# Supplementary material
Source: Research Square preprint supplement (doi:10.21203/rs.3.rs-9818054/v1)
Supplement: Supplementary file 1 [file cb5d746756f8d71239a04883.xlsx]

## Sheet: S1_panel_comp
field	value	note
recommended_direction_type	shared_hotspot	Highest composite support score in the narrative scoreboard.
recommended_direction_label	Shared hotspot architecture: arabica cultivated vs arabica introgressed	Recommended primary manuscript direction.
support_scope	shared hotspot architecture	Panel scope represented by the primary direction.
composite_support_score	0.875	Average of direction-specific support components.
top_accession_shortlist_size	24	Union of top role-specific accession candidates.
top_shared_hotspot_count	10	Number of retained shared hotspot rows.
primary_source_key	arabica_cultivated__vs__arabica_introgressed	Primary contrast or contrast-linked source key.
Table S1. Composition of the coffee diversity panel used in this study.
Summary of the accessions retained for the final analysis panel, including species assignment, arabica analysis-group classification, varietal label, country of origin, and genome-structure categories. This table provides the descriptive framework for the population-genomic comparisons presented in Figure 1 and for the accession-level analyses summarized in Tables S2–S7.

## Sheet: S2_accession_priorities
seq_id	accession_name	analysis_group	variety	primary_role_labels	primary_role_count	best_primary_role_priority	combined_evidence_percentile	overall_combined_evidence_rank	introgression_affinity_percentile	overall_introgression_affinity_rank	subgenome_asymmetry_percentile	overall_subgenome_asymmetry_rank	mean_introgressed_shift	mean_wild_shift	mean_canephora_affinity	mean_eugenioides_affinity	country_of_origin	donor_institute	notes
11	H.Timor	arabica_introgressed	Introgressed	introgressed_reference	1	1	0.762821	1	0.987179	1	0.538462	13	0.0480891	-0.0218761	0.444852	0.575864	Brazil	IAPAR	HT832/2 - Accession Introgressed with C. canephora
31_ArabustaPizze	Arabusta Pizze	arabica_introgressed	Introgressed	introgressed_reference	1	1	0.737179	2	0.948718	3	0.525641	16	0.00354437	-0.018686	0.504729	0.59924	France	R&D Nestlé	Arabusta generally designate first generation hybrids C. arabica X C. canephora (4n) made by IFCC in the 70s
10	Iapar 59	arabica_introgressed	Introgressed	introgressed_reference	1	1	0.727564	3	0.961538	2	0.49359	24	0.0306615	-0.0255515	0.426746	0.571342	Brazil	IAPAR	Cross between H. timor HT832/2 x Villa Sarchi. Parent to Sarchimores
30_OroAzteca	Oro Azteca	arabica_introgressed	Introgressed	introgressed_reference	1	1	0.721154	4	0.935897	4	0.50641	21	0.018322	-0.02771	0.424658	0.572857	France	R&D Nestlé	Descendant of HT832/1 x Caturra - Catimores
16	IPR99	arabica_introgressed	Introgressed	introgressed_reference	1	1	0.701923	6	0.910256	5	0.49359	24	0.00411927	-0.0256202	0.42165	0.575675	Brazil	IAPAR	Cultivar Introgressed with C. canephora - HT832/2
29_CostaRica95	Costa Rica 95	arabica_introgressed	Introgressed	introgressed_reference	1	1	0.669872	8	0.820513	7	0.519231	19	-0.0220365	-0.029582	0.414369	0.574303	France	R&D Nestlé	Descendant of HT832/1 x Caturra - Catimores
14	Geisha	arabica_cultivated	Cultivated	asymmetry_support; cultivated_comparator	2	2	0.451923	24	0.24359	30	0.660256	4	-0.0903482	-0.0131539	0.408119	0.589017	Ethiopia	IAPAR	Independent of Yemen cultivars, Ethiopian wild accession found near the town of Gesha (1931) and directly put to field. No known relationship with Bourbon/Typica.
TIP1	TIP1	arabica_cultivated	Cultivated	asymmetry_support; cultivated_comparator	2	2	0.439103	27	0.269231	28	0.608974	10	-0.0923032	-0.0308554	0.409211	0.587702	Brazil	IAC - Campinas	C. arabica variety Typica reference
BB1	BB1	arabica_cultivated	Cultivated	asymmetry_support; cultivated_comparator	2	2	0.371795	31	0.0897436	38	0.653846	5	-0.0932954	-0.0324153	0.407446	0.585972	Brazil	IAC - Campinas	C. arabica variety Bourbon reference
17_BMJM	BMJM	arabica_cultivated	Cultivated	cultivated_comparator	1	2	0.522436	19	0.564103	17	0.480769	28	-0.0879784	-0.0172785	0.410874	0.590502	Brazil	EMBRAPA	C. arabica bourbon (Blue Mountain) from Jamaica can be considered as cultivated but with very few breeding cycles. British introduced coffee to Jamaica in 1730 using Typica obtained from French in Martinique.
23_Erecta	Erecta	arabica_cultivated	Cultivated	cultivated_comparator	1	2	0.442308	26	0.358974	27	0.525641	16	-0.0893235	-0.0296148	0.408284	0.586651	Brazil	EMBRAPA	C. arabica Typica mutant probably from Java - indonesia
Amsterdam	Amsterdam	arabica_cultivated	Cultivated	cultivated_comparator	1	2	0.429487	28	0.371795	26	0.487179	26	-0.093071	-0.0297788	0.411396	0.59209	The Netherlands	Amsterdam Botanical Garden	Bourbon variant growing in Amsterdam Botanical Gardens
28_Topazio	Topazio	arabica_cultivated	Cultivated	cultivated_comparator	1	2	0.394231	29	0.384615	25	0.403846	33	-0.0915182	-0.0315151	0.410928	0.588245	Brazil	EMBRAPA	C. arabica cultivar issued from a cross between Catuaí Amarelo and Mundo Novo
37_Catuai99	Catuai99	arabica_cultivated	Cultivated	cultivated_comparator	1	2	0.384615	30	0.205128	33	0.564103	12	-0.0931934	-0.0323007	0.408393	0.588764	Brazil	EMBRAPA	Issued from a cross between Mundo Novo and Caturra (Caturra is a mutated Bourbon)
5	Ar22-05	arabica_wild	Wild	asymmetry_support	1	3	0.708333	5	0.679487	13	0.737179	1	-0.0881088	0.00581241	0.413198	0.593065	Ethiopia	IRD	Ethiopian accession, IRD recollection mission 1966.
15	Eth28.2	arabica_wild	Wild	asymmetry_support	1	3	0.682692	7	0.730769	12	0.634615	7	-0.0878257	0.0117439	0.413407	0.594397	Ethiopia	R&D Nestlé	Ethiopian accession, Seeds from Jimma Agricultural Research Centre, Ethiopian Institute of Agricultural Research -JARC/EIAR
9	E159/180	arabica_wild	Wild	asymmetry_support	1	3	0.647436	10	0.653846	14	0.641026	6	-0.0878569	0.00144556	0.412245	0.591586	Ethiopia	IAPAR	Ethiopian accession, Seeds from CATIE, FAO collection 1964
4	Ar02-05	arabica_wild	Wild	asymmetry_support	1	3	0.621795	11	0.551282	18	0.692308	2	-0.0889013	0.0108482	0.411355	0.593663	Ethiopia	IRD	Ethiopian accession, IRD recollection mission 1966.
19_E237	E237	arabica_wild	Wild	asymmetry_support	1	3	0.573718	12	0.525641	19	0.621795	8	-0.0898157	0.00448652	0.412647	0.592829	Ethiopia	EMBRAPA	Ethiopian accession, Seeds from CATIE, FAO collection 1964
24_ET59	ET59	arabica_wild	Wild	asymmetry_support	1	3	0.557692	15	0.448718	21	0.666667	3	-0.0898355	-0.00377055	0.411258	0.58999	Ethiopia	EMBRAPA	Ethiopian accession related to Ar59
27_Rubi	Rubi	arabica_cultivated	Cultivated	asymmetry_support	1	3	0.339744	35	0.0641026	39	0.615385	9	-0.0946207	-0.0329724	0.407835	0.585938	Brazil	EMBRAPA	C. arabica cultivar issued from a cross between Catuaí Vermelho and Mundo Novo
Table S4. Accession-level evidence and priority rankings across the primary introgression and subgenome-asymmetry axes.
Accession-level rankings derived from combined evidence, introgression affinity, subgenome asymmetry, and affinity to Coffea canephora and C. eugenioides. This table identifies the accessions that most strongly anchor the cultivated–introgressed contrast and distinguishes them from accessions prioritized primarily by subgenome asymmetry.

## Sheet: S3_shared_hotspot_metrics
contrast	contig	sgC_n_markers_hotspot	sgE_n_markers_hotspot	combined_n_markers_hotspot	sgC_top_marker_count_in_hotspot	sgE_top_marker_count_in_hotspot	combined_top_marker_count_in_hotspot	sgC_min_pos	sgC_max_pos	sgE_min_pos	sgE_max_pos	union_min_pos	union_max_pos	union_span_bp	overlap_min_pos	overlap_max_pos	overlap_bp	jaccard_bp	sgC_mean_abs_delta_af	sgE_mean_abs_delta_af	combined_mean_abs_delta_af	combined_max_abs_delta_af	sgC_overlap_fraction	sgE_overlap_fraction	hotspot_support_balance	sgC_top_marker_count_in_overlap	sgE_top_marker_count_in_overlap	combined_top_marker_count_in_overlap	overlap_status	combined_marker_support_percentile	combined_effect_percentile	interval_overlap_percentile	support_balance_percentile	consensus_hotspot_percentile	consensus_hotspot_rank	hotspot_category	priority_score
arabica_cultivated__vs__arabica_introgressed	chr_D_sg_C_(Scaffold_1;HRSCAF_2)	177	155	332	177	155	332	6804956	30148002	7028545	30145533	6804956	30148002	23343046	7028545	30145533	23116988	0.990316	0.83936	0.838871	0.839115	0.916667	0.990316	1	0.875706	174	155	329	overlap	1	1	1	0.8	0.95	1	shared	0.95
Table S2. Metrics defining the primary cultivated–introgressed hotspot shared across both subgenomes.
Summary statistics for the primary shared hotspot associated with the cultivated–introgressed contrast, including subgenome-specific interval spans, marker counts, overlap statistics, annotation support, and combined evidence metrics. These values define the core hotspot shown in Figure 2.

## Sheet: S4_subgenome_specific
contrast	contig	subgenome	n_markers_hotspot	n_markers_top_marker_table	min_pos	max_pos	span_bp	mean_abs_delta_af	max_abs_delta_af	subgenome_specific_support_percentile	hotspot_category	priority_score	combined_n_markers_hotspot	consensus_hotspot_rank
arabica_cultivated__vs__arabica_introgressed	Scaffold_8057;HRSCAF_8058	sgC	3	3	24237	82382	58145	0.916667	0.916667	0.997585	subgenome_specific	0.997585	3
arabica_cultivated__vs__arabica_introgressed	Scaffold_8102;HRSCAF_8103	sgC	3	3	21248	144170	122922	0.805556	0.833333	0.997585	subgenome_specific	0.997585	3
arabica_cultivated__vs__arabica_introgressed	Scaffold_7400;HRSCAF_7401	sgC	2	2	55064	63193	8129	0.916667	0.916667	0.961353	subgenome_specific	0.961353	2
arabica_cultivated__vs__arabica_introgressed	Scaffold_8097;HRSCAF_8098	sgC	2	2	31885	66821	34936	0.916667	0.916667	0.961353	subgenome_specific	0.961353	2
arabica_cultivated__vs__arabica_introgressed	Scaffold_6280;HRSCAF_6281	sgE	2	2	40180	40321	141	0.9	0.916667	0.961353	subgenome_specific	0.961353	2
arabica_cultivated__vs__arabica_introgressed	Scaffold_5277;HRSCAF_5278	sgE	2	2	25473	34295	8822	0.875	0.916667	0.961353	subgenome_specific	0.961353	2
arabica_cultivated__vs__arabica_introgressed	Scaffold_8079;HRSCAF_8080	sgE	2	2	36242	62856	26614	0.875	0.916667	0.961353	subgenome_specific	0.961353	2
arabica_cultivated__vs__arabica_introgressed	Scaffold_8099;HRSCAF_8100	sgE	2	2	86272	99365	13093	0.791667	0.916667	0.961353	subgenome_specific	0.961353	2
arabica_cultivated__vs__arabica_introgressed	Scaffold_8106;HRSCAF_8107	sgE	2	2	12708	54911	42203	0.758333	0.916667	0.961353	subgenome_specific	0.961353	2
arabica_cultivated__vs__arabica_introgressed	Scaffold_8068;HRSCAF_8069	sgE	2	2	19766	33965	14199	0.716667	0.833333	0.961353	subgenome_specific	0.961353	2
arabica_cultivated__vs__arabica_introgressed	chr_J_sg_C_(Scaffold_7;HRSCAF_8)	sgC	2	2	16779132	17175026	395894	0.7	0.716667	0.961353	subgenome_specific	0.961353	2
arabica_cultivated__vs__arabica_introgressed	Scaffold_8116;HRSCAF_8117	sgE	2	2	28359	56928	28569	0.616667	0.633333	0.961353	subgenome_specific	0.961353	2
arabica_cultivated__vs__arabica_introgressed	Scaffold_7841;HRSCAF_7842	sgE	2	2	50787	112666	61879	0.583333	0.583333	0.961353	subgenome_specific	0.961353	2
arabica_cultivated__vs__arabica_introgressed	Scaffold_7875;HRSCAF_7876	sgE	2	2	62024	73179	11155	0.583333	0.583333	0.961353	subgenome_specific	0.961353	2
Table S3. Subgenome-specific hotspot intervals retained outside the primary shared-hotspot model.
Summary of hotspot intervals that were retained numerically in either subgenome but did not replace the primary shared-hotspot model as the strongest explanation of panel structure. These regions provide additional context for subgenome-specific differentiation beyond the dominant cultivated–introgressed hotspot.

## Sheet: S5_primary_hotspot_genes
hotspot_identifier	contrast	source_contig	target_chromosome_label	gene_id	gene_symbol	gene_name	gene_biotype	description	keyword_categories					Table S5. RefSeq gene inventory overlapping the annotation-supported primary hotspot in subgenomes C and E.
arabica_cultivated__vs__arabica_introgressed::chr_D_sg_C_(Scaffold_1;HRSCAF_2)::sgC	arabica_cultivated__vs__arabica_introgressed	chr_D_sg_C_(Scaffold_1;HRSCAF_2)	4c	gene-LOC113738984	LOC113738984	LOC113738984	protein_coding	self-incompatibility protein S1-like						Complete inventory of RefSeq genes overlapping the conservatively rescued primary hotspot intervals in subgenomes C and E. Gene models are listed as recovered from the annotation-supported coordinate transfer and provide the full gene space underlying the hotspot summarized in Figure 4.
arabica_cultivated__vs__arabica_introgressed::chr_D_sg_C_(Scaffold_1;HRSCAF_2)::sgC	arabica_cultivated__vs__arabica_introgressed	chr_D_sg_C_(Scaffold_1;HRSCAF_2)	4c	gene-LOC113740483	LOC113740483	LOC113740483	snoRNA	small nucleolar RNA R71
arabica_cultivated__vs__arabica_introgressed::chr_D_sg_C_(Scaffold_1;HRSCAF_2)::sgC	arabica_cultivated__vs__arabica_introgressed	chr_D_sg_C_(Scaffold_1;HRSCAF_2)	4c	gene-LOC113740505	LOC113740505	LOC113740505	snoRNA	small nucleolar RNA R71
arabica_cultivated__vs__arabica_introgressed::chr_D_sg_C_(Scaffold_1;HRSCAF_2)::sgC	arabica_cultivated__vs__arabica_introgressed	chr_D_sg_C_(Scaffold_1;HRSCAF_2)	4c	gene-LOC113739880	LOC113739880	LOC113739880	protein_coding	uncharacterized LOC113739880
arabica_cultivated__vs__arabica_introgressed::chr_D_sg_C_(Scaffold_1;HRSCAF_2)::sgC	arabica_cultivated__vs__arabica_introgressed	chr_D_sg_C_(Scaffold_1;HRSCAF_2)	4c	gene-LOC113739881	LOC113739881	LOC113739881	protein_coding	FKBP12-interacting protein of 37 kDa
arabica_cultivated__vs__arabica_introgressed::chr_D_sg_C_(Scaffold_1;HRSCAF_2)::sgC	arabica_cultivated__vs__arabica_introgressed	chr_D_sg_C_(Scaffold_1;HRSCAF_2)	4c	gene-LOC113740250	LOC113740250	LOC113740250	lncRNA	uncharacterized LOC113740250
arabica_cultivated__vs__arabica_introgressed::chr_D_sg_C_(Scaffold_1;HRSCAF_2)::sgC	arabica_cultivated__vs__arabica_introgressed	chr_D_sg_C_(Scaffold_1;HRSCAF_2)	4c	gene-LOC113739431	LOC113739431	LOC113739431	protein_coding	short-chain dehydrogenase TIC 32 B%2C chloroplastic-like
arabica_cultivated__vs__arabica_introgressed::chr_D_sg_C_(Scaffold_1;HRSCAF_2)::sgC	arabica_cultivated__vs__arabica_introgressed	chr_D_sg_C_(Scaffold_1;HRSCAF_2)	4c	gene-LOC113738646	LOC113738646	LOC113738646	protein_coding	kinetochore protein SPC25 homolog
arabica_cultivated__vs__arabica_introgressed::chr_D_sg_C_(Scaffold_1;HRSCAF_2)::sgC	arabica_cultivated__vs__arabica_introgressed	chr_D_sg_C_(Scaffold_1;HRSCAF_2)	4c	gene-LOC113739883	LOC113739883	LOC113739883	protein_coding	uncharacterized LOC113739883
arabica_cultivated__vs__arabica_introgressed::chr_D_sg_C_(Scaffold_1;HRSCAF_2)::sgC	arabica_cultivated__vs__arabica_introgressed	chr_D_sg_C_(Scaffold_1;HRSCAF_2)	4c	gene-LOC113739957	LOC113739957	LOC113739957	protein_coding	cell division cycle protein 48 homolog
arabica_cultivated__vs__arabica_introgressed::chr_D_sg_C_(Scaffold_1;HRSCAF_2)::sgC	arabica_cultivated__vs__arabica_introgressed	chr_D_sg_C_(Scaffold_1;HRSCAF_2)	4c	gene-LOC140004679	LOC140004679	LOC140004679	protein_coding	uncharacterized LOC140004679
arabica_cultivated__vs__arabica_introgressed::chr_D_sg_C_(Scaffold_1;HRSCAF_2)::sgC	arabica_cultivated__vs__arabica_introgressed	chr_D_sg_C_(Scaffold_1;HRSCAF_2)	4c	gene-LOC113740259	LOC113740259	LOC113740259	protein_coding	arginine-specific demethylase JMJ20
arabica_cultivated__vs__arabica_introgressed::chr_D_sg_C_(Scaffold_1;HRSCAF_2)::sgC	arabica_cultivated__vs__arabica_introgressed	chr_D_sg_C_(Scaffold_1;HRSCAF_2)	4c	gene-LOC113740443	LOC113740443	LOC113740443	protein_coding	protein neprosin-like
arabica_cultivated__vs__arabica_introgressed::chr_D_sg_C_(Scaffold_1;HRSCAF_2)::sgC	arabica_cultivated__vs__arabica_introgressed	chr_D_sg_C_(Scaffold_1;HRSCAF_2)	4c	gene-LOC113738437	LOC113738437	LOC113738437	protein_coding	pterocarpan synthase 1-like
arabica_cultivated__vs__arabica_introgressed::chr_D_sg_C_(Scaffold_1;HRSCAF_2)::sgC	arabica_cultivated__vs__arabica_introgressed	chr_D_sg_C_(Scaffold_1;HRSCAF_2)	4c	gene-LOC113738987	LOC113738987	LOC113738987	protein_coding	pterocarpan synthase 1-like
arabica_cultivated__vs__arabica_introgressed::chr_D_sg_C_(Scaffold_1;HRSCAF_2)::sgC	arabica_cultivated__vs__arabica_introgressed	chr_D_sg_C_(Scaffold_1;HRSCAF_2)	4c	gene-LOC113738988	LOC113738988	LOC113738988	protein_coding	pterocarpan synthase 1-like
arabica_cultivated__vs__arabica_introgressed::chr_D_sg_C_(Scaffold_1;HRSCAF_2)::sgC	arabica_cultivated__vs__arabica_introgressed	chr_D_sg_C_(Scaffold_1;HRSCAF_2)	4c	gene-LOC113738989	LOC113738989	LOC113738989	protein_coding	dirigent protein 2-like
arabica_cultivated__vs__arabica_introgressed::chr_D_sg_C_(Scaffold_1;HRSCAF_2)::sgC	arabica_cultivated__vs__arabica_introgressed	chr_D_sg_C_(Scaffold_1;HRSCAF_2)	4c	gene-LOC113738990	LOC113738990	LOC113738990	protein_coding	protein neprosin-like
arabica_cultivated__vs__arabica_introgressed::chr_D_sg_C_(Scaffold_1;HRSCAF_2)::sgC	arabica_cultivated__vs__arabica_introgressed	chr_D_sg_C_(Scaffold_1;HRSCAF_2)	4c	gene-LOC113738991	LOC113738991	LOC113738991	protein_coding	pterocarpan synthase 1-like
arabica_cultivated__vs__arabica_introgressed::chr_D_sg_C_(Scaffold_1;HRSCAF_2)::sgC	arabica_cultivated__vs__arabica_introgressed	chr_D_sg_C_(Scaffold_1;HRSCAF_2)	4c	gene-LOC140004680	LOC140004680	LOC140004680	protein_coding	uncharacterized LOC140004680
arabica_cultivated__vs__arabica_introgressed::chr_D_sg_C_(Scaffold_1;HRSCAF_2)::sgC	arabica_cultivated__vs__arabica_introgressed	chr_D_sg_C_(Scaffold_1;HRSCAF_2)	4c	gene-LOC113740377	LOC113740377	LOC113740377	protein_coding	protein neprosin
arabica_cultivated__vs__arabica_introgressed::chr_D_sg_C_(Scaffold_1;HRSCAF_2)::sgC	arabica_cultivated__vs__arabica_introgressed	chr_D_sg_C_(Scaffold_1;HRSCAF_2)	4c	gene-LOC113739884	LOC113739884	LOC113739884	protein_coding	protein neprosin
arabica_cultivated__vs__arabica_introgressed::chr_D_sg_C_(Scaffold_1;HRSCAF_2)::sgC	arabica_cultivated__vs__arabica_introgressed	chr_D_sg_C_(Scaffold_1;HRSCAF_2)	4c	gene-LOC113739886	LOC113739886	LOC113739886	protein_coding	plant UBX domain-containing protein 10
arabica_cultivated__vs__arabica_introgressed::chr_D_sg_C_(Scaffold_1;HRSCAF_2)::sgC	arabica_cultivated__vs__arabica_introgressed	chr_D_sg_C_(Scaffold_1;HRSCAF_2)	4c	gene-LOC113739885	LOC113739885	LOC113739885	protein_coding	inosine-5'-monophosphate dehydrogenase 2
arabica_cultivated__vs__arabica_introgressed::chr_D_sg_C_(Scaffold_1;HRSCAF_2)::sgC	arabica_cultivated__vs__arabica_introgressed	chr_D_sg_C_(Scaffold_1;HRSCAF_2)	4c	gene-LOC113739416	LOC113739416	LOC113739416	protein_coding	uncharacterized LOC113739416
arabica_cultivated__vs__arabica_introgressed::chr_D_sg_C_(Scaffold_1;HRSCAF_2)::sgC	arabica_cultivated__vs__arabica_introgressed	chr_D_sg_C_(Scaffold_1;HRSCAF_2)	4c	gene-LOC113739888	LOC113739888	LOC113739888	protein_coding	protein MODIFIER OF SNC1 1-like
arabica_cultivated__vs__arabica_introgressed::chr_D_sg_C_(Scaffold_1;HRSCAF_2)::sgC	arabica_cultivated__vs__arabica_introgressed	chr_D_sg_C_(Scaffold_1;HRSCAF_2)	4c	gene-LOC113740018	LOC113740018	LOC113740018	protein_coding	uncharacterized LOC113740018
arabica_cultivated__vs__arabica_introgressed::chr_D_sg_C_(Scaffold_1;HRSCAF_2)::sgC	arabica_cultivated__vs__arabica_introgressed	chr_D_sg_C_(Scaffold_1;HRSCAF_2)	4c	gene-LOC140003964	LOC140003964	LOC140003964	protein_coding	uncharacterized LOC140003964
arabica_cultivated__vs__arabica_introgressed::chr_D_sg_C_(Scaffold_1;HRSCAF_2)::sgC	arabica_cultivated__vs__arabica_introgressed	chr_D_sg_C_(Scaffold_1;HRSCAF_2)	4c	gene-LOC113738992	LOC113738992	LOC113738992	protein_coding	DELLA protein RGL3-like
arabica_cultivated__vs__arabica_introgressed::chr_D_sg_C_(Scaffold_1;HRSCAF_2)::sgC	arabica_cultivated__vs__arabica_introgressed	chr_D_sg_C_(Scaffold_1;HRSCAF_2)	4c	gene-LOC140005282	LOC140005282	LOC140005282	protein_coding	uncharacterized LOC140005282
arabica_cultivated__vs__arabica_introgressed::chr_D_sg_C_(Scaffold_1;HRSCAF_2)::sgC	arabica_cultivated__vs__arabica_introgressed	chr_D_sg_C_(Scaffold_1;HRSCAF_2)	4c	gene-LOC140005281	LOC140005281	LOC140005281	protein_coding	probable apyrase 7
arabica_cultivated__vs__arabica_introgressed::chr_D_sg_C_(Scaffold_1;HRSCAF_2)::sgC	arabica_cultivated__vs__arabica_introgressed	chr_D_sg_C_(Scaffold_1;HRSCAF_2)	4c	gene-LOC140004681	LOC140004681	LOC140004681	protein_coding	DELLA protein RGL1-like
arabica_cultivated__vs__arabica_introgressed::chr_D_sg_C_(Scaffold_1;HRSCAF_2)::sgC	arabica_cultivated__vs__arabica_introgressed	chr_D_sg_C_(Scaffold_1;HRSCAF_2)	4c	gene-LOC140005284	LOC140005284	LOC140005284	protein_coding	uncharacterized LOC140005284
arabica_cultivated__vs__arabica_introgressed::chr_D_sg_C_(Scaffold_1;HRSCAF_2)::sgC	arabica_cultivated__vs__arabica_introgressed	chr_D_sg_C_(Scaffold_1;HRSCAF_2)	4c	gene-LOC140005285	LOC140005285	LOC140005285	lncRNA	uncharacterized LOC140005285
arabica_cultivated__vs__arabica_introgressed::chr_D_sg_C_(Scaffold_1;HRSCAF_2)::sgC	arabica_cultivated__vs__arabica_introgressed	chr_D_sg_C_(Scaffold_1;HRSCAF_2)	4c	gene-LOC140005283	LOC140005283	LOC140005283	protein_coding	probable apyrase 7
arabica_cultivated__vs__arabica_introgressed::chr_D_sg_C_(Scaffold_1;HRSCAF_2)::sgC	arabica_cultivated__vs__arabica_introgressed	chr_D_sg_C_(Scaffold_1;HRSCAF_2)	4c	gene-LOC140005286	LOC140005286	LOC140005286	protein_coding	uncharacterized LOC140005286
arabica_cultivated__vs__arabica_introgressed::chr_D_sg_C_(Scaffold_1;HRSCAF_2)::sgC	arabica_cultivated__vs__arabica_introgressed	chr_D_sg_C_(Scaffold_1;HRSCAF_2)	4c	gene-LOC140004682	LOC140004682	LOC140004682	protein_coding	DELLA protein RGL3-like
arabica_cultivated__vs__arabica_introgressed::chr_D_sg_C_(Scaffold_1;HRSCAF_2)::sgC	arabica_cultivated__vs__arabica_introgressed	chr_D_sg_C_(Scaffold_1;HRSCAF_2)	4c	gene-LOC113738994	LOC113738994	LOC113738994	protein_coding	uncharacterized LOC113738994
arabica_cultivated__vs__arabica_introgressed::chr_D_sg_C_(Scaffold_1;HRSCAF_2)::sgC	arabica_cultivated__vs__arabica_introgressed	chr_D_sg_C_(Scaffold_1;HRSCAF_2)	4c	gene-LOC113739964	LOC113739964	LOC113739964	protein_coding	probable apyrase 7
arabica_cultivated__vs__arabica_introgressed::chr_D_sg_C_(Scaffold_1;HRSCAF_2)::sgC	arabica_cultivated__vs__arabica_introgressed	chr_D_sg_C_(Scaffold_1;HRSCAF_2)	4c	gene-LOC113738573	LOC113738573	LOC113738573	protein_coding	uncharacterized LOC113738573
arabica_cultivated__vs__arabica_introgressed::chr_D_sg_C_(Scaffold_1;HRSCAF_2)::sgC	arabica_cultivated__vs__arabica_introgressed	chr_D_sg_C_(Scaffold_1;HRSCAF_2)	4c	gene-LOC140004683	LOC140004683	LOC140004683	protein_coding	uncharacterized LOC140004683
arabica_cultivated__vs__arabica_introgressed::chr_D_sg_C_(Scaffold_1;HRSCAF_2)::sgC	arabica_cultivated__vs__arabica_introgressed	chr_D_sg_C_(Scaffold_1;HRSCAF_2)	4c	gene-LOC113738995	LOC113738995	LOC113738995	protein_coding	major allergen Pyr c 1-like
arabica_cultivated__vs__arabica_introgressed::chr_D_sg_C_(Scaffold_1;HRSCAF_2)::sgC	arabica_cultivated__vs__arabica_introgressed	chr_D_sg_C_(Scaffold_1;HRSCAF_2)	4c	gene-LOC113738996	LOC113738996	LOC113738996	protein_coding	major allergen Pru ar 1-like
arabica_cultivated__vs__arabica_introgressed::chr_D_sg_C_(Scaffold_1;HRSCAF_2)::sgC	arabica_cultivated__vs__arabica_introgressed	chr_D_sg_C_(Scaffold_1;HRSCAF_2)	4c	gene-LOC113738797	LOC113738797	LOC113738797	protein_coding	uncharacterized LOC113738797
arabica_cultivated__vs__arabica_introgressed::chr_D_sg_C_(Scaffold_1;HRSCAF_2)::sgC	arabica_cultivated__vs__arabica_introgressed	chr_D_sg_C_(Scaffold_1;HRSCAF_2)	4c	gene-LOC113738436	LOC113738436	LOC113738436	protein_coding	DEAD-box ATP-dependent RNA helicase 50
arabica_cultivated__vs__arabica_introgressed::chr_D_sg_C_(Scaffold_1;HRSCAF_2)::sgC	arabica_cultivated__vs__arabica_introgressed	chr_D_sg_C_(Scaffold_1;HRSCAF_2)	4c	gene-LOC113738998	LOC113738998	LOC113738998	protein_coding	protein MICRORCHIDIA 6-like
arabica_cultivated__vs__arabica_introgressed::chr_D_sg_C_(Scaffold_1;HRSCAF_2)::sgC	arabica_cultivated__vs__arabica_introgressed	chr_D_sg_C_(Scaffold_1;HRSCAF_2)	4c	gene-LOC140004921	LOC140004921	LOC140004921	lncRNA	uncharacterized LOC140004921
arabica_cultivated__vs__arabica_introgressed::chr_D_sg_C_(Scaffold_1;HRSCAF_2)::sgC	arabica_cultivated__vs__arabica_introgressed	chr_D_sg_C_(Scaffold_1;HRSCAF_2)	4c	gene-LOC113739890	LOC113739890	LOC113739890	protein_coding	vacuolar sorting protein 18
arabica_cultivated__vs__arabica_introgressed::chr_D_sg_C_(Scaffold_1;HRSCAF_2)::sgC	arabica_cultivated__vs__arabica_introgressed	chr_D_sg_C_(Scaffold_1;HRSCAF_2)	4c	gene-LOC113739891	LOC113739891	LOC113739891	protein_coding	serine/threonine protein phosphatase 2A 55 kDa regulatory subunit B beta isoform-like	kinase_signaling
arabica_cultivated__vs__arabica_introgressed::chr_D_sg_C_(Scaffold_1;HRSCAF_2)::sgC	arabica_cultivated__vs__arabica_introgressed	chr_D_sg_C_(Scaffold_1;HRSCAF_2)	4c	gene-LOC140004684	LOC140004684	LOC140004684	protein_coding	pectinesterase QRT1-like
arabica_cultivated__vs__arabica_introgressed::chr_D_sg_C_(Scaffold_1;HRSCAF_2)::sgC	arabica_cultivated__vs__arabica_introgressed	chr_D_sg_C_(Scaffold_1;HRSCAF_2)	4c	gene-LOC113739000	LOC113739000	LOC113739000	protein_coding	homeobox protein knotted-1-like 2
arabica_cultivated__vs__arabica_introgressed::chr_D_sg_C_(Scaffold_1;HRSCAF_2)::sgC	arabica_cultivated__vs__arabica_introgressed	chr_D_sg_C_(Scaffold_1;HRSCAF_2)	4c	gene-LOC113739001	LOC113739001	LOC113739001	protein_coding	protein STRICTOSIDINE SYNTHASE-LIKE 11-like
arabica_cultivated__vs__arabica_introgressed::chr_D_sg_C_(Scaffold_1;HRSCAF_2)::sgC	arabica_cultivated__vs__arabica_introgressed	chr_D_sg_C_(Scaffold_1;HRSCAF_2)	4c	gene-LOC140004685	LOC140004685	LOC140004685	protein_coding	uncharacterized LOC140004685
arabica_cultivated__vs__arabica_introgressed::chr_D_sg_C_(Scaffold_1;HRSCAF_2)::sgC	arabica_cultivated__vs__arabica_introgressed	chr_D_sg_C_(Scaffold_1;HRSCAF_2)	4c	gene-LOC140004923	LOC140004923	LOC140004923	lncRNA	uncharacterized LOC140004923
arabica_cultivated__vs__arabica_introgressed::chr_D_sg_C_(Scaffold_1;HRSCAF_2)::sgC	arabica_cultivated__vs__arabica_introgressed	chr_D_sg_C_(Scaffold_1;HRSCAF_2)	4c	gene-LOC140004686	LOC140004686	LOC140004686	protein_coding	replication protein A 70 kDa DNA-binding subunit B-like
arabica_cultivated__vs__arabica_introgressed::chr_D_sg_C_(Scaffold_1;HRSCAF_2)::sgC	arabica_cultivated__vs__arabica_introgressed	chr_D_sg_C_(Scaffold_1;HRSCAF_2)	4c	gene-LOC113739003	LOC113739003	LOC113739003	protein_coding	uncharacterized LOC113739003
arabica_cultivated__vs__arabica_introgressed::chr_D_sg_C_(Scaffold_1;HRSCAF_2)::sgC	arabica_cultivated__vs__arabica_introgressed	chr_D_sg_C_(Scaffold_1;HRSCAF_2)	4c	gene-LOC113738753	LOC113738753	LOC113738753	protein_coding	uncharacterized LOC113738753
arabica_cultivated__vs__arabica_introgressed::chr_D_sg_C_(Scaffold_1;HRSCAF_2)::sgC	arabica_cultivated__vs__arabica_introgressed	chr_D_sg_C_(Scaffold_1;HRSCAF_2)	4c	gene-LOC113739892	LOC113739892	LOC113739892	protein_coding	uncharacterized LOC113739892
arabica_cultivated__vs__arabica_introgressed::chr_D_sg_C_(Scaffold_1;HRSCAF_2)::sgC	arabica_cultivated__vs__arabica_introgressed	chr_D_sg_C_(Scaffold_1;HRSCAF_2)	4c	gene-LOC113739893	LOC113739893	LOC113739893	protein_coding	glutaredoxin-like
arabica_cultivated__vs__arabica_introgressed::chr_D_sg_C_(Scaffold_1;HRSCAF_2)::sgC	arabica_cultivated__vs__arabica_introgressed	chr_D_sg_C_(Scaffold_1;HRSCAF_2)	4c	gene-LOC113739894	LOC113739894	LOC113739894	protein_coding	TSL-kinase interacting protein 1-like	kinase_signaling
arabica_cultivated__vs__arabica_introgressed::chr_D_sg_C_(Scaffold_1;HRSCAF_2)::sgC	arabica_cultivated__vs__arabica_introgressed	chr_D_sg_C_(Scaffold_1;HRSCAF_2)	4c	gene-LOC113739896	LOC113739896	LOC113739896	lncRNA	uncharacterized LOC113739896
arabica_cultivated__vs__arabica_introgressed::chr_D_sg_C_(Scaffold_1;HRSCAF_2)::sgC	arabica_cultivated__vs__arabica_introgressed	chr_D_sg_C_(Scaffold_1;HRSCAF_2)	4c	gene-LOC113739492	LOC113739492	LOC113739492	protein_coding	uncharacterized LOC113739492
arabica_cultivated__vs__arabica_introgressed::chr_D_sg_C_(Scaffold_1;HRSCAF_2)::sgC	arabica_cultivated__vs__arabica_introgressed	chr_D_sg_C_(Scaffold_1;HRSCAF_2)	4c	gene-LOC113738687	LOC113738687	LOC113738687	protein_coding	uncharacterized LOC113738687
arabica_cultivated__vs__arabica_introgressed::chr_D_sg_C_(Scaffold_1;HRSCAF_2)::sgC	arabica_cultivated__vs__arabica_introgressed	chr_D_sg_C_(Scaffold_1;HRSCAF_2)	4c	gene-LOC113739004	LOC113739004	LOC113739004	protein_coding	transcription factor ABORTED MICROSPORES-like	transcriptional_regulation
arabica_cultivated__vs__arabica_introgressed::chr_D_sg_C_(Scaffold_1;HRSCAF_2)::sgC	arabica_cultivated__vs__arabica_introgressed	chr_D_sg_C_(Scaffold_1;HRSCAF_2)	4c	gene-LOC113738416	LOC113738416	LOC113738416	protein_coding	M phase phosphoprotein 10-like
arabica_cultivated__vs__arabica_introgressed::chr_D_sg_C_(Scaffold_1;HRSCAF_2)::sgC	arabica_cultivated__vs__arabica_introgressed	chr_D_sg_C_(Scaffold_1;HRSCAF_2)	4c	gene-LOC113739898	LOC113739898	LOC113739898	protein_coding	uncharacterized LOC113739898
arabica_cultivated__vs__arabica_introgressed::chr_D_sg_C_(Scaffold_1;HRSCAF_2)::sgC	arabica_cultivated__vs__arabica_introgressed	chr_D_sg_C_(Scaffold_1;HRSCAF_2)	4c	gene-LOC113739899	LOC113739899	LOC113739899	protein_coding	uncharacterized LOC113739899
arabica_cultivated__vs__arabica_introgressed::chr_D_sg_C_(Scaffold_1;HRSCAF_2)::sgC	arabica_cultivated__vs__arabica_introgressed	chr_D_sg_C_(Scaffold_1;HRSCAF_2)	4c	gene-LOC113739006	LOC113739006	LOC113739006	protein_coding	uncharacterized LOC113739006
arabica_cultivated__vs__arabica_introgressed::chr_D_sg_C_(Scaffold_1;HRSCAF_2)::sgC	arabica_cultivated__vs__arabica_introgressed	chr_D_sg_C_(Scaffold_1;HRSCAF_2)	4c	gene-LOC113740452	LOC113740452	LOC113740452	protein_coding	putative disease resistance RPP13-like protein 3	stress_response
arabica_cultivated__vs__arabica_introgressed::chr_D_sg_C_(Scaffold_1;HRSCAF_2)::sgC	arabica_cultivated__vs__arabica_introgressed	chr_D_sg_C_(Scaffold_1;HRSCAF_2)	4c	gene-LOC113738645	LOC113738645	LOC113738645	protein_coding	probable disease resistance RPP8-like protein 2	stress_response
arabica_cultivated__vs__arabica_introgressed::chr_D_sg_C_(Scaffold_1;HRSCAF_2)::sgC	arabica_cultivated__vs__arabica_introgressed	chr_D_sg_C_(Scaffold_1;HRSCAF_2)	4c	gene-LOC113739007	LOC113739007	LOC113739007	protein_coding	putative disease resistance protein At1g50180	stress_response
arabica_cultivated__vs__arabica_introgressed::chr_D_sg_C_(Scaffold_1;HRSCAF_2)::sgC	arabica_cultivated__vs__arabica_introgressed	chr_D_sg_C_(Scaffold_1;HRSCAF_2)	4c	gene-LOC113740484	LOC113740484	LOC113740484	snoRNA	small nucleolar RNA R71
arabica_cultivated__vs__arabica_introgressed::chr_D_sg_C_(Scaffold_1;HRSCAF_2)::sgC	arabica_cultivated__vs__arabica_introgressed	chr_D_sg_C_(Scaffold_1;HRSCAF_2)	4c	gene-LOC113739375	LOC113739375	LOC113739375	protein_coding	putative disease resistance protein At1g50180	stress_response
arabica_cultivated__vs__arabica_introgressed::chr_D_sg_C_(Scaffold_1;HRSCAF_2)::sgC	arabica_cultivated__vs__arabica_introgressed	chr_D_sg_C_(Scaffold_1;HRSCAF_2)	4c	gene-LOC113739376	LOC113739376	LOC113739376	lncRNA	uncharacterized LOC113739376
arabica_cultivated__vs__arabica_introgressed::chr_D_sg_C_(Scaffold_1;HRSCAF_2)::sgC	arabica_cultivated__vs__arabica_introgressed	chr_D_sg_C_(Scaffold_1;HRSCAF_2)	4c	gene-LOC113740506	LOC113740506	LOC113740506	snoRNA	small nucleolar RNA R71
arabica_cultivated__vs__arabica_introgressed::chr_D_sg_C_(Scaffold_1;HRSCAF_2)::sgC	arabica_cultivated__vs__arabica_introgressed	chr_D_sg_C_(Scaffold_1;HRSCAF_2)	4c	gene-LOC113740498	LOC113740498	LOC113740498	snoRNA	small nucleolar RNA R71
arabica_cultivated__vs__arabica_introgressed::chr_D_sg_C_(Scaffold_1;HRSCAF_2)::sgC	arabica_cultivated__vs__arabica_introgressed	chr_D_sg_C_(Scaffold_1;HRSCAF_2)	4c	gene-LOC113739904	LOC113739904	LOC113739904	protein_coding	RAF-like serine/threonine-protein kinase PRAF	kinase_signaling
arabica_cultivated__vs__arabica_introgressed::chr_D_sg_C_(Scaffold_1;HRSCAF_2)::sgC	arabica_cultivated__vs__arabica_introgressed	chr_D_sg_C_(Scaffold_1;HRSCAF_2)	4c	gene-LOC113738831	LOC113738831	LOC113738831	protein_coding	putative disease resistance RPP13-like protein 3	stress_response
arabica_cultivated__vs__arabica_introgressed::chr_D_sg_C_(Scaffold_1;HRSCAF_2)::sgC	arabica_cultivated__vs__arabica_introgressed	chr_D_sg_C_(Scaffold_1;HRSCAF_2)	4c	gene-LOC113739412	LOC113739412	LOC113739412	protein_coding	putative disease resistance RPP13-like protein 3	stress_response
arabica_cultivated__vs__arabica_introgressed::chr_D_sg_C_(Scaffold_1;HRSCAF_2)::sgC	arabica_cultivated__vs__arabica_introgressed	chr_D_sg_C_(Scaffold_1;HRSCAF_2)	4c	gene-LOC113740214	LOC113740214	LOC113740214	protein_coding	putative disease resistance RPP13-like protein 3	stress_response
arabica_cultivated__vs__arabica_introgressed::chr_D_sg_C_(Scaffold_1;HRSCAF_2)::sgC	arabica_cultivated__vs__arabica_introgressed	chr_D_sg_C_(Scaffold_1;HRSCAF_2)	4c	gene-LOC113739010	LOC113739010	LOC113739010	protein_coding	phosphoenolpyruvate/phosphate translocator 1%2C chloroplastic-like
arabica_cultivated__vs__arabica_introgressed::chr_D_sg_C_(Scaffold_1;HRSCAF_2)::sgC	arabica_cultivated__vs__arabica_introgressed	chr_D_sg_C_(Scaffold_1;HRSCAF_2)	4c	gene-LOC113740512	LOC113740512	LOC113740512	snoRNA	small nucleolar RNA R71
arabica_cultivated__vs__arabica_introgressed::chr_D_sg_C_(Scaffold_1;HRSCAF_2)::sgC	arabica_cultivated__vs__arabica_introgressed	chr_D_sg_C_(Scaffold_1;HRSCAF_2)	4c	gene-LOC140005290	LOC140005290	LOC140005290	protein_coding	uncharacterized LOC140005290
arabica_cultivated__vs__arabica_introgressed::chr_D_sg_C_(Scaffold_1;HRSCAF_2)::sgC	arabica_cultivated__vs__arabica_introgressed	chr_D_sg_C_(Scaffold_1;HRSCAF_2)	4c	gene-LOC140004687	LOC140004687	LOC140004687	protein_coding	transcription factor MYB115-like	transcriptional_regulation
arabica_cultivated__vs__arabica_introgressed::chr_D_sg_C_(Scaffold_1;HRSCAF_2)::sgC	arabica_cultivated__vs__arabica_introgressed	chr_D_sg_C_(Scaffold_1;HRSCAF_2)	4c	gene-LOC113739012	LOC113739012	LOC113739012	protein_coding	transcription factor MYB98-like	transcriptional_regulation
arabica_cultivated__vs__arabica_introgressed::chr_D_sg_C_(Scaffold_1;HRSCAF_2)::sgC	arabica_cultivated__vs__arabica_introgressed	chr_D_sg_C_(Scaffold_1;HRSCAF_2)	4c	gene-LOC140005291	LOC140005291	LOC140005291	protein_coding	GDSL esterase/lipase At5g62930-like
arabica_cultivated__vs__arabica_introgressed::chr_D_sg_C_(Scaffold_1;HRSCAF_2)::sgC	arabica_cultivated__vs__arabica_introgressed	chr_D_sg_C_(Scaffold_1;HRSCAF_2)	4c	gene-LOC140004924	LOC140004924	LOC140004924	lncRNA	uncharacterized LOC140004924
arabica_cultivated__vs__arabica_introgressed::chr_D_sg_C_(Scaffold_1;HRSCAF_2)::sgC	arabica_cultivated__vs__arabica_introgressed	chr_D_sg_C_(Scaffold_1;HRSCAF_2)	4c	gene-LOC113739906	LOC113739906	LOC113739906	protein_coding	probable boron transporter 2	transport_membrane
arabica_cultivated__vs__arabica_introgressed::chr_D_sg_C_(Scaffold_1;HRSCAF_2)::sgC	arabica_cultivated__vs__arabica_introgressed	chr_D_sg_C_(Scaffold_1;HRSCAF_2)	4c	gene-LOC140004925	LOC140004925	LOC140004925	lncRNA	uncharacterized LOC140004925
arabica_cultivated__vs__arabica_introgressed::chr_D_sg_C_(Scaffold_1;HRSCAF_2)::sgC	arabica_cultivated__vs__arabica_introgressed	chr_D_sg_C_(Scaffold_1;HRSCAF_2)	4c	gene-LOC140004688	LOC140004688	LOC140004688	protein_coding	uncharacterized LOC140004688
arabica_cultivated__vs__arabica_introgressed::chr_D_sg_C_(Scaffold_1;HRSCAF_2)::sgC	arabica_cultivated__vs__arabica_introgressed	chr_D_sg_C_(Scaffold_1;HRSCAF_2)	4c	gene-LOC140005292	LOC140005292	LOC140005292	lncRNA	uncharacterized LOC140005292
arabica_cultivated__vs__arabica_introgressed::chr_D_sg_C_(Scaffold_1;HRSCAF_2)::sgC	arabica_cultivated__vs__arabica_introgressed	chr_D_sg_C_(Scaffold_1;HRSCAF_2)	4c	gene-LOC140005293	LOC140005293	LOC140005293	protein_coding	iron-sulfur cluster assembly protein 1-like
arabica_cultivated__vs__arabica_introgressed::chr_D_sg_C_(Scaffold_1;HRSCAF_2)::sgC	arabica_cultivated__vs__arabica_introgressed	chr_D_sg_C_(Scaffold_1;HRSCAF_2)	4c	gene-LOC140004689	LOC140004689	LOC140004689	protein_coding	B3 domain-containing protein Os03g0212300-like
arabica_cultivated__vs__arabica_introgressed::chr_D_sg_C_(Scaffold_1;HRSCAF_2)::sgC	arabica_cultivated__vs__arabica_introgressed	chr_D_sg_C_(Scaffold_1;HRSCAF_2)	4c	gene-LOC140005295	LOC140005295	LOC140005295	protein_coding	pantothenate kinase 2-like	kinase_signaling
arabica_cultivated__vs__arabica_introgressed::chr_D_sg_C_(Scaffold_1;HRSCAF_2)::sgC	arabica_cultivated__vs__arabica_introgressed	chr_D_sg_C_(Scaffold_1;HRSCAF_2)	4c	gene-TRNAP-UGG-19	TRNAP-UGG	TRNAP-UGG	tRNA	transfer RNA proline (anticodon UGG)
arabica_cultivated__vs__arabica_introgressed::chr_D_sg_C_(Scaffold_1;HRSCAF_2)::sgC	arabica_cultivated__vs__arabica_introgressed	chr_D_sg_C_(Scaffold_1;HRSCAF_2)	4c	gene-LOC113742996	LOC113742996	LOC113742996	protein_coding	uncharacterized LOC113742996
arabica_cultivated__vs__arabica_introgressed::chr_D_sg_C_(Scaffold_1;HRSCAF_2)::sgC	arabica_cultivated__vs__arabica_introgressed	chr_D_sg_C_(Scaffold_1;HRSCAF_2)	4c	gene-LOC113739911	LOC113739911	LOC113739911	protein_coding	dof zinc finger protein DOF5.6
arabica_cultivated__vs__arabica_introgressed::chr_D_sg_C_(Scaffold_1;HRSCAF_2)::sgC	arabica_cultivated__vs__arabica_introgressed	chr_D_sg_C_(Scaffold_1;HRSCAF_2)	4c	gene-LOC140004690	LOC140004690	LOC140004690	protein_coding	uncharacterized LOC140004690
arabica_cultivated__vs__arabica_introgressed::chr_D_sg_C_(Scaffold_1;HRSCAF_2)::sgC	arabica_cultivated__vs__arabica_introgressed	chr_D_sg_C_(Scaffold_1;HRSCAF_2)	4c	gene-LOC140005296	LOC140005296	LOC140005296	protein_coding	serine/threonine-protein kinase ATM-like	kinase_signaling
arabica_cultivated__vs__arabica_introgressed::chr_D_sg_C_(Scaffold_1;HRSCAF_2)::sgC	arabica_cultivated__vs__arabica_introgressed	chr_D_sg_C_(Scaffold_1;HRSCAF_2)	4c	gene-LOC113739408	LOC113739408	LOC113739408	protein_coding	probable inactive poly [ADP-ribose] polymerase SRO5
arabica_cultivated__vs__arabica_introgressed::chr_D_sg_C_(Scaffold_1;HRSCAF_2)::sgC	arabica_cultivated__vs__arabica_introgressed	chr_D_sg_C_(Scaffold_1;HRSCAF_2)	4c	gene-LOC113739383	LOC113739383	LOC113739383	protein_coding	putative pentatricopeptide repeat-containing protein At5g08490
arabica_cultivated__vs__arabica_introgressed::chr_D_sg_C_(Scaffold_1;HRSCAF_2)::sgC	arabica_cultivated__vs__arabica_introgressed	chr_D_sg_C_(Scaffold_1;HRSCAF_2)	4c	gene-LOC113739142	LOC113739142	LOC113739142	protein_coding	uncharacterized LOC113739142
arabica_cultivated__vs__arabica_introgressed::chr_D_sg_C_(Scaffold_1;HRSCAF_2)::sgC	arabica_cultivated__vs__arabica_introgressed	chr_D_sg_C_(Scaffold_1;HRSCAF_2)	4c	gene-LOC113709083	LOC113709083	LOC113709083	protein_coding	uncharacterized LOC113709083
arabica_cultivated__vs__arabica_introgressed::chr_D_sg_C_(Scaffold_1;HRSCAF_2)::sgC	arabica_cultivated__vs__arabica_introgressed	chr_D_sg_C_(Scaffold_1;HRSCAF_2)	4c	gene-LOC113708423	LOC113708423	LOC113708423	protein_coding	putative disease resistance RPP13-like protein 3	stress_response
arabica_cultivated__vs__arabica_introgressed::chr_D_sg_C_(Scaffold_1;HRSCAF_2)::sgC	arabica_cultivated__vs__arabica_introgressed	chr_D_sg_C_(Scaffold_1;HRSCAF_2)	4c	gene-LOC113739915	LOC113739915	LOC113739915	protein_coding	putative disease resistance protein At1g50180	stress_response
arabica_cultivated__vs__arabica_introgressed::chr_D_sg_C_(Scaffold_1;HRSCAF_2)::sgC	arabica_cultivated__vs__arabica_introgressed	chr_D_sg_C_(Scaffold_1;HRSCAF_2)	4c	gene-LOC140004692	LOC140004692	LOC140004692	protein_coding	disease resistance protein RPP8-like	stress_response
arabica_cultivated__vs__arabica_introgressed::chr_D_sg_C_(Scaffold_1;HRSCAF_2)::sgC	arabica_cultivated__vs__arabica_introgressed	chr_D_sg_C_(Scaffold_1;HRSCAF_2)	4c	gene-LOC113740487	LOC113740487	LOC113740487	snoRNA	small nucleolar RNA R71
arabica_cultivated__vs__arabica_introgressed::chr_D_sg_C_(Scaffold_1;HRSCAF_2)::sgC	arabica_cultivated__vs__arabica_introgressed	chr_D_sg_C_(Scaffold_1;HRSCAF_2)	4c	gene-LOC113739013	LOC113739013	LOC113739013	protein_coding	uncharacterized LOC113739013
arabica_cultivated__vs__arabica_introgressed::chr_D_sg_C_(Scaffold_1;HRSCAF_2)::sgC	arabica_cultivated__vs__arabica_introgressed	chr_D_sg_C_(Scaffold_1;HRSCAF_2)	4c	gene-LOC113738390	LOC113738390	LOC113738390	lncRNA	uncharacterized LOC113738390
arabica_cultivated__vs__arabica_introgressed::chr_D_sg_C_(Scaffold_1;HRSCAF_2)::sgC	arabica_cultivated__vs__arabica_introgressed	chr_D_sg_C_(Scaffold_1;HRSCAF_2)	4c	gene-LOC113739014	LOC113739014	LOC113739014	protein_coding	putative disease resistance RPP13-like protein 3	stress_response
arabica_cultivated__vs__arabica_introgressed::chr_D_sg_C_(Scaffold_1;HRSCAF_2)::sgC	arabica_cultivated__vs__arabica_introgressed	chr_D_sg_C_(Scaffold_1;HRSCAF_2)	4c	gene-LOC113739017	LOC113739017	LOC113739017	protein_coding	uncharacterized LOC113739017
arabica_cultivated__vs__arabica_introgressed::chr_D_sg_C_(Scaffold_1;HRSCAF_2)::sgC	arabica_cultivated__vs__arabica_introgressed	chr_D_sg_C_(Scaffold_1;HRSCAF_2)	4c	gene-LOC113739018	LOC113739018	LOC113739018	protein_coding	replication factor A protein 1-like
arabica_cultivated__vs__arabica_introgressed::chr_D_sg_C_(Scaffold_1;HRSCAF_2)::sgC	arabica_cultivated__vs__arabica_introgressed	chr_D_sg_C_(Scaffold_1;HRSCAF_2)	4c	gene-LOC113739019	LOC113739019	LOC113739019	protein_coding	1-deoxy-D-xylulose 5-phosphate reductoisomerase%2C chloroplastic-like
arabica_cultivated__vs__arabica_introgressed::chr_D_sg_C_(Scaffold_1;HRSCAF_2)::sgC	arabica_cultivated__vs__arabica_introgressed	chr_D_sg_C_(Scaffold_1;HRSCAF_2)	4c	gene-LOC140005298	LOC140005298	LOC140005298	protein_coding	disease resistance protein RPP8-like	stress_response
arabica_cultivated__vs__arabica_introgressed::chr_D_sg_C_(Scaffold_1;HRSCAF_2)::sgC	arabica_cultivated__vs__arabica_introgressed	chr_D_sg_C_(Scaffold_1;HRSCAF_2)	4c	gene-LOC140004693	LOC140004693	LOC140004693	protein_coding	putative disease resistance RPP13-like protein 3	stress_response
arabica_cultivated__vs__arabica_introgressed::chr_D_sg_C_(Scaffold_1;HRSCAF_2)::sgC	arabica_cultivated__vs__arabica_introgressed	chr_D_sg_C_(Scaffold_1;HRSCAF_2)	4c	gene-LOC140004694	LOC140004694	LOC140004694	protein_coding	epi-neemfruitin B 7-O-acetyltransferse L7AT-like
arabica_cultivated__vs__arabica_introgressed::chr_D_sg_C_(Scaffold_1;HRSCAF_2)::sgC	arabica_cultivated__vs__arabica_introgressed	chr_D_sg_C_(Scaffold_1;HRSCAF_2)	4c	gene-LOC140005422	LOC140005422	LOC140005422	snoRNA	small nucleolar RNA R71
arabica_cultivated__vs__arabica_introgressed::chr_D_sg_C_(Scaffold_1;HRSCAF_2)::sgC	arabica_cultivated__vs__arabica_introgressed	chr_D_sg_C_(Scaffold_1;HRSCAF_2)	4c	gene-LOC140005299	LOC140005299	LOC140005299	protein_coding	putative disease resistance RPP13-like protein 3	stress_response
arabica_cultivated__vs__arabica_introgressed::chr_D_sg_C_(Scaffold_1;HRSCAF_2)::sgC	arabica_cultivated__vs__arabica_introgressed	chr_D_sg_C_(Scaffold_1;HRSCAF_2)	4c	gene-LOC140004696	LOC140004696	LOC140004696	protein_coding	uncharacterized LOC140004696
arabica_cultivated__vs__arabica_introgressed::chr_D_sg_C_(Scaffold_1;HRSCAF_2)::sgC	arabica_cultivated__vs__arabica_introgressed	chr_D_sg_C_(Scaffold_1;HRSCAF_2)	4c	gene-LOC113717512	LOC113717512	LOC113717512	snoRNA	small nucleolar RNA R71
arabica_cultivated__vs__arabica_introgressed::chr_D_sg_C_(Scaffold_1;HRSCAF_2)::sgC	arabica_cultivated__vs__arabica_introgressed	chr_D_sg_C_(Scaffold_1;HRSCAF_2)	4c	gene-LOC140004697	LOC140004697	LOC140004697	protein_coding	uncharacterized LOC140004697
arabica_cultivated__vs__arabica_introgressed::chr_D_sg_C_(Scaffold_1;HRSCAF_2)::sgC	arabica_cultivated__vs__arabica_introgressed	chr_D_sg_C_(Scaffold_1;HRSCAF_2)	4c	gene-LOC113736170	LOC113736170	LOC113736170	snoRNA	small nucleolar RNA R71
arabica_cultivated__vs__arabica_introgressed::chr_D_sg_C_(Scaffold_1;HRSCAF_2)::sgC	arabica_cultivated__vs__arabica_introgressed	chr_D_sg_C_(Scaffold_1;HRSCAF_2)	4c	gene-LOC140004698	LOC140004698	LOC140004698	protein_coding	1-deoxy-D-xylulose 5-phosphate reductoisomerase
arabica_cultivated__vs__arabica_introgressed::chr_D_sg_C_(Scaffold_1;HRSCAF_2)::sgC	arabica_cultivated__vs__arabica_introgressed	chr_D_sg_C_(Scaffold_1;HRSCAF_2)	4c	gene-LOC140005301	LOC140005301	LOC140005301	protein_coding	putative disease resistance protein At1g50180	stress_response
arabica_cultivated__vs__arabica_introgressed::chr_D_sg_C_(Scaffold_1;HRSCAF_2)::sgC	arabica_cultivated__vs__arabica_introgressed	chr_D_sg_C_(Scaffold_1;HRSCAF_2)	4c	gene-LOC140005300	LOC140005300	LOC140005300	protein_coding	probable disease resistance RPP8-like protein 2	stress_response
arabica_cultivated__vs__arabica_introgressed::chr_D_sg_C_(Scaffold_1;HRSCAF_2)::sgC	arabica_cultivated__vs__arabica_introgressed	chr_D_sg_C_(Scaffold_1;HRSCAF_2)	4c	gene-LOC113739020	LOC113739020	LOC113739020	lncRNA	uncharacterized LOC113739020
arabica_cultivated__vs__arabica_introgressed::chr_D_sg_C_(Scaffold_1;HRSCAF_2)::sgC	arabica_cultivated__vs__arabica_introgressed	chr_D_sg_C_(Scaffold_1;HRSCAF_2)	4c	gene-LOC113739913	LOC113739913	LOC113739913	protein_coding	putative disease resistance RPP13-like protein 3	stress_response
arabica_cultivated__vs__arabica_introgressed::chr_D_sg_C_(Scaffold_1;HRSCAF_2)::sgC	arabica_cultivated__vs__arabica_introgressed	chr_D_sg_C_(Scaffold_1;HRSCAF_2)	4c	gene-LOC140004699	LOC140004699	LOC140004699	protein_coding	stemmadenine O-acetyltransferase-like
arabica_cultivated__vs__arabica_introgressed::chr_D_sg_C_(Scaffold_1;HRSCAF_2)::sgC	arabica_cultivated__vs__arabica_introgressed	chr_D_sg_C_(Scaffold_1;HRSCAF_2)	4c	gene-LOC113739916	LOC113739916	LOC113739916	protein_coding	1-deoxy-D-xylulose 5-phosphate reductoisomerase%2C chloroplastic-like
arabica_cultivated__vs__arabica_introgressed::chr_D_sg_C_(Scaffold_1;HRSCAF_2)::sgC	arabica_cultivated__vs__arabica_introgressed	chr_D_sg_C_(Scaffold_1;HRSCAF_2)	4c	gene-LOC113739939	LOC113739939	LOC113739939	protein_coding	peroxisomal membrane protein PEX14-like	transport_membrane
arabica_cultivated__vs__arabica_introgressed::chr_D_sg_C_(Scaffold_1;HRSCAF_2)::sgC	arabica_cultivated__vs__arabica_introgressed	chr_D_sg_C_(Scaffold_1;HRSCAF_2)	4c	gene-LOC113738529	LOC113738529	LOC113738529	protein_coding	uncharacterized LOC113738529
arabica_cultivated__vs__arabica_introgressed::chr_D_sg_C_(Scaffold_1;HRSCAF_2)::sgC	arabica_cultivated__vs__arabica_introgressed	chr_D_sg_C_(Scaffold_1;HRSCAF_2)	4c	gene-LOC113742089	LOC113742089	LOC113742089	protein_coding	protein KINESIN LIGHT CHAIN-RELATED 3
arabica_cultivated__vs__arabica_introgressed::chr_D_sg_C_(Scaffold_1;HRSCAF_2)::sgC	arabica_cultivated__vs__arabica_introgressed	chr_D_sg_C_(Scaffold_1;HRSCAF_2)	4c	gene-LOC113740372	LOC113740372	LOC113740372	protein_coding	putative disease resistance RPP13-like protein 3	stress_response
arabica_cultivated__vs__arabica_introgressed::chr_D_sg_C_(Scaffold_1;HRSCAF_2)::sgC	arabica_cultivated__vs__arabica_introgressed	chr_D_sg_C_(Scaffold_1;HRSCAF_2)	4c	gene-TRNAL-UAG-5	TRNAL-UAG	TRNAL-UAG	tRNA	transfer RNA leucine (anticodon UAG)
arabica_cultivated__vs__arabica_introgressed::chr_D_sg_C_(Scaffold_1;HRSCAF_2)::sgC	arabica_cultivated__vs__arabica_introgressed	chr_D_sg_C_(Scaffold_1;HRSCAF_2)	4c	gene-LOC113738617	LOC113738617	LOC113738617	protein_coding	serine/threonine/tyrosine-protein kinase HT1-like	kinase_signaling
arabica_cultivated__vs__arabica_introgressed::chr_D_sg_C_(Scaffold_1;HRSCAF_2)::sgC	arabica_cultivated__vs__arabica_introgressed	chr_D_sg_C_(Scaffold_1;HRSCAF_2)	4c	gene-LOC140004926	LOC140004926	LOC140004926	lncRNA	uncharacterized LOC140004926
arabica_cultivated__vs__arabica_introgressed::chr_D_sg_C_(Scaffold_1;HRSCAF_2)::sgC	arabica_cultivated__vs__arabica_introgressed	chr_D_sg_C_(Scaffold_1;HRSCAF_2)	4c	gene-LOC113740170	LOC113740170	LOC113740170	protein_coding	4-hydroxybenzoate geranyltransferase 2-like
arabica_cultivated__vs__arabica_introgressed::chr_D_sg_C_(Scaffold_1;HRSCAF_2)::sgC	arabica_cultivated__vs__arabica_introgressed	chr_D_sg_C_(Scaffold_1;HRSCAF_2)	4c	gene-LOC113738597	LOC113738597	LOC113738597	protein_coding	protein FAR1-RELATED SEQUENCE 8-like
arabica_cultivated__vs__arabica_introgressed::chr_D_sg_C_(Scaffold_1;HRSCAF_2)::sgC	arabica_cultivated__vs__arabica_introgressed	chr_D_sg_C_(Scaffold_1;HRSCAF_2)	4c	gene-LOC140005303	LOC140005303	LOC140005303	protein_coding	replication protein A 70 kDa DNA-binding subunit B-like
arabica_cultivated__vs__arabica_introgressed::chr_D_sg_C_(Scaffold_1;HRSCAF_2)::sgC	arabica_cultivated__vs__arabica_introgressed	chr_D_sg_C_(Scaffold_1;HRSCAF_2)	4c	gene-LOC113739528	LOC113739528	LOC113739528	protein_coding	4-hydroxybenzoate geranyltransferase 2
arabica_cultivated__vs__arabica_introgressed::chr_D_sg_C_(Scaffold_1;HRSCAF_2)::sgC	arabica_cultivated__vs__arabica_introgressed	chr_D_sg_C_(Scaffold_1;HRSCAF_2)	4c	gene-LOC113739024	LOC113739024	LOC113739024	protein_coding	4-hydroxybenzoate geranyltransferase 2-like
arabica_cultivated__vs__arabica_introgressed::chr_D_sg_C_(Scaffold_1;HRSCAF_2)::sgC	arabica_cultivated__vs__arabica_introgressed	chr_D_sg_C_(Scaffold_1;HRSCAF_2)	4c	gene-LOC113740264	LOC113740264	LOC113740264	protein_coding	general transcription and DNA repair factor IIH subunit TFB4
arabica_cultivated__vs__arabica_introgressed::chr_D_sg_C_(Scaffold_1;HRSCAF_2)::sgC	arabica_cultivated__vs__arabica_introgressed	chr_D_sg_C_(Scaffold_1;HRSCAF_2)	4c	gene-LOC113739923	LOC113739923	LOC113739923	protein_coding	metal tolerance protein 1-like
arabica_cultivated__vs__arabica_introgressed::chr_D_sg_C_(Scaffold_1;HRSCAF_2)::sgC	arabica_cultivated__vs__arabica_introgressed	chr_D_sg_C_(Scaffold_1;HRSCAF_2)	4c	gene-LOC140004927	LOC140004927	LOC140004927	lncRNA	uncharacterized LOC140004927
arabica_cultivated__vs__arabica_introgressed::chr_D_sg_C_(Scaffold_1;HRSCAF_2)::sgC	arabica_cultivated__vs__arabica_introgressed	chr_D_sg_C_(Scaffold_1;HRSCAF_2)	4c	gene-LOC113739517	LOC113739517	LOC113739517	protein_coding	cysteine proteinase inhibitor 4-like
arabica_cultivated__vs__arabica_introgressed::chr_D_sg_C_(Scaffold_1;HRSCAF_2)::sgC	arabica_cultivated__vs__arabica_introgressed	chr_D_sg_C_(Scaffold_1;HRSCAF_2)	4c	gene-LOC140005305	LOC140005305	LOC140005305	protein_coding	cysteine proteinase inhibitor 1-like
arabica_cultivated__vs__arabica_introgressed::chr_D_sg_C_(Scaffold_1;HRSCAF_2)::sgC	arabica_cultivated__vs__arabica_introgressed	chr_D_sg_C_(Scaffold_1;HRSCAF_2)	4c	gene-LOC113739425	LOC113739425	LOC113739425	protein_coding	cysteine proteinase inhibitor 8-like
arabica_cultivated__vs__arabica_introgressed::chr_D_sg_C_(Scaffold_1;HRSCAF_2)::sgC	arabica_cultivated__vs__arabica_introgressed	chr_D_sg_C_(Scaffold_1;HRSCAF_2)	4c	gene-LOC140004701	LOC140004701	LOC140004701	protein_coding	uncharacterized LOC140004701
arabica_cultivated__vs__arabica_introgressed::chr_D_sg_C_(Scaffold_1;HRSCAF_2)::sgC	arabica_cultivated__vs__arabica_introgressed	chr_D_sg_C_(Scaffold_1;HRSCAF_2)	4c	gene-LOC113739637	LOC113739637	LOC113739637	protein_coding	uncharacterized LOC113739637
arabica_cultivated__vs__arabica_introgressed::chr_D_sg_C_(Scaffold_1;HRSCAF_2)::sgC	arabica_cultivated__vs__arabica_introgressed	chr_D_sg_C_(Scaffold_1;HRSCAF_2)	4c	gene-LOC140004928	LOC140004928	LOC140004928	lncRNA	uncharacterized LOC140004928
arabica_cultivated__vs__arabica_introgressed::chr_D_sg_C_(Scaffold_1;HRSCAF_2)::sgC	arabica_cultivated__vs__arabica_introgressed	chr_D_sg_C_(Scaffold_1;HRSCAF_2)	4c	gene-LOC140004702	LOC140004702	LOC140004702	protein_coding	uncharacterized LOC140004702
arabica_cultivated__vs__arabica_introgressed::chr_D_sg_C_(Scaffold_1;HRSCAF_2)::sgC	arabica_cultivated__vs__arabica_introgressed	chr_D_sg_C_(Scaffold_1;HRSCAF_2)	4c	gene-LOC113738526	LOC113738526	LOC113738526	protein_coding	CASP-like protein 4A3
arabica_cultivated__vs__arabica_introgressed::chr_D_sg_C_(Scaffold_1;HRSCAF_2)::sgC	arabica_cultivated__vs__arabica_introgressed	chr_D_sg_C_(Scaffold_1;HRSCAF_2)	4c	gene-LOC113739927	LOC113739927	LOC113739927	protein_coding	protein EXECUTER 2%2C chloroplastic-like
arabica_cultivated__vs__arabica_introgressed::chr_D_sg_C_(Scaffold_1;HRSCAF_2)::sgC	arabica_cultivated__vs__arabica_introgressed	chr_D_sg_C_(Scaffold_1;HRSCAF_2)	4c	gene-LOC113739502	LOC113739502	LOC113739502	protein_coding	uncharacterized LOC113739502
arabica_cultivated__vs__arabica_introgressed::chr_D_sg_C_(Scaffold_1;HRSCAF_2)::sgC	arabica_cultivated__vs__arabica_introgressed	chr_D_sg_C_(Scaffold_1;HRSCAF_2)	4c	gene-LOC113740511	LOC113740511	LOC113740511	snoRNA	small nucleolar RNA R71
arabica_cultivated__vs__arabica_introgressed::chr_D_sg_C_(Scaffold_1;HRSCAF_2)::sgC	arabica_cultivated__vs__arabica_introgressed	chr_D_sg_C_(Scaffold_1;HRSCAF_2)	4c	gene-LOC113739485	LOC113739485	LOC113739485	protein_coding	probable serine/threonine-protein kinase PIX13	kinase_signaling
arabica_cultivated__vs__arabica_introgressed::chr_D_sg_C_(Scaffold_1;HRSCAF_2)::sgC	arabica_cultivated__vs__arabica_introgressed	chr_D_sg_C_(Scaffold_1;HRSCAF_2)	4c	gene-LOC113740215	LOC113740215	LOC113740215	protein_coding	E3 ubiquitin-protein ligase SIS3-like
arabica_cultivated__vs__arabica_introgressed::chr_D_sg_C_(Scaffold_1;HRSCAF_2)::sgC	arabica_cultivated__vs__arabica_introgressed	chr_D_sg_C_(Scaffold_1;HRSCAF_2)	4c	gene-LOC113738775	LOC113738775	LOC113738775	protein_coding	uncharacterized LOC113738775
arabica_cultivated__vs__arabica_introgressed::chr_D_sg_C_(Scaffold_1;HRSCAF_2)::sgC	arabica_cultivated__vs__arabica_introgressed	chr_D_sg_C_(Scaffold_1;HRSCAF_2)	4c	gene-LOC113739513	LOC113739513	LOC113739513	protein_coding	polygalacturonase 1 beta-like protein 2
arabica_cultivated__vs__arabica_introgressed::chr_D_sg_C_(Scaffold_1;HRSCAF_2)::sgC	arabica_cultivated__vs__arabica_introgressed	chr_D_sg_C_(Scaffold_1;HRSCAF_2)	4c	gene-LOC140004703	LOC140004703	LOC140004703	protein_coding	uncharacterized LOC140004703
arabica_cultivated__vs__arabica_introgressed::chr_D_sg_C_(Scaffold_1;HRSCAF_2)::sgC	arabica_cultivated__vs__arabica_introgressed	chr_D_sg_C_(Scaffold_1;HRSCAF_2)	4c	gene-LOC140005306	LOC140005306	LOC140005306	lncRNA	uncharacterized LOC140005306
arabica_cultivated__vs__arabica_introgressed::chr_D_sg_C_(Scaffold_1;HRSCAF_2)::sgC	arabica_cultivated__vs__arabica_introgressed	chr_D_sg_C_(Scaffold_1;HRSCAF_2)	4c	gene-LOC140004929	LOC140004929	LOC140004929	lncRNA	uncharacterized LOC140004929
arabica_cultivated__vs__arabica_introgressed::chr_D_sg_C_(Scaffold_1;HRSCAF_2)::sgC	arabica_cultivated__vs__arabica_introgressed	chr_D_sg_C_(Scaffold_1;HRSCAF_2)	4c	gene-LOC140005307	LOC140005307	LOC140005307	protein_coding	uncharacterized LOC140005307
arabica_cultivated__vs__arabica_introgressed::chr_D_sg_C_(Scaffold_1;HRSCAF_2)::sgC	arabica_cultivated__vs__arabica_introgressed	chr_D_sg_C_(Scaffold_1;HRSCAF_2)	4c	gene-LOC140004930	LOC140004930	LOC140004930	lncRNA	uncharacterized LOC140004930
arabica_cultivated__vs__arabica_introgressed::chr_D_sg_C_(Scaffold_1;HRSCAF_2)::sgC	arabica_cultivated__vs__arabica_introgressed	chr_D_sg_C_(Scaffold_1;HRSCAF_2)	4c	gene-LOC113739108	LOC113739108	LOC113739108	protein_coding	transcription factor bHLH162-like	transcriptional_regulation
arabica_cultivated__vs__arabica_introgressed::chr_D_sg_C_(Scaffold_1;HRSCAF_2)::sgC	arabica_cultivated__vs__arabica_introgressed	chr_D_sg_C_(Scaffold_1;HRSCAF_2)	4c	gene-LOC113740513	LOC113740513	LOC113740513	snoRNA	small nucleolar RNA R71
arabica_cultivated__vs__arabica_introgressed::chr_D_sg_C_(Scaffold_1;HRSCAF_2)::sgC	arabica_cultivated__vs__arabica_introgressed	chr_D_sg_C_(Scaffold_1;HRSCAF_2)	4c	gene-LOC113739538	LOC113739538	LOC113739538	protein_coding	transcription factor bHLH162-like	transcriptional_regulation
arabica_cultivated__vs__arabica_introgressed::chr_D_sg_C_(Scaffold_1;HRSCAF_2)::sgC	arabica_cultivated__vs__arabica_introgressed	chr_D_sg_C_(Scaffold_1;HRSCAF_2)	4c	gene-LOC113740509	LOC113740509	LOC113740509	snoRNA	small nucleolar RNA R71
arabica_cultivated__vs__arabica_introgressed::chr_D_sg_C_(Scaffold_1;HRSCAF_2)::sgC	arabica_cultivated__vs__arabica_introgressed	chr_D_sg_C_(Scaffold_1;HRSCAF_2)	4c	gene-LOC113739539	LOC113739539	LOC113739539	protein_coding	transcription factor bHLH162-like	transcriptional_regulation
arabica_cultivated__vs__arabica_introgressed::chr_D_sg_C_(Scaffold_1;HRSCAF_2)::sgC	arabica_cultivated__vs__arabica_introgressed	chr_D_sg_C_(Scaffold_1;HRSCAF_2)	4c	gene-LOC113739110	LOC113739110	LOC113739110	protein_coding	transcription factor bHLH162-like	transcriptional_regulation
arabica_cultivated__vs__arabica_introgressed::chr_D_sg_C_(Scaffold_1;HRSCAF_2)::sgC	arabica_cultivated__vs__arabica_introgressed	chr_D_sg_C_(Scaffold_1;HRSCAF_2)	4c	gene-LOC113739112	LOC113739112	LOC113739112	protein_coding	uncharacterized LOC113739112
arabica_cultivated__vs__arabica_introgressed::chr_D_sg_C_(Scaffold_1;HRSCAF_2)::sgC	arabica_cultivated__vs__arabica_introgressed	chr_D_sg_C_(Scaffold_1;HRSCAF_2)	4c	gene-LOC113740002	LOC113740002	LOC113740002	protein_coding	serine/threonine-protein kinase 52-like	kinase_signaling
arabica_cultivated__vs__arabica_introgressed::chr_D_sg_C_(Scaffold_1;HRSCAF_2)::sgC	arabica_cultivated__vs__arabica_introgressed	chr_D_sg_C_(Scaffold_1;HRSCAF_2)	4c	gene-LOC113739114	LOC113739114	LOC113739114	protein_coding	bidirectional sugar transporter SWEET5-like	transport_membrane
arabica_cultivated__vs__arabica_introgressed::chr_D_sg_C_(Scaffold_1;HRSCAF_2)::sgC	arabica_cultivated__vs__arabica_introgressed	chr_D_sg_C_(Scaffold_1;HRSCAF_2)	4c	gene-LOC113739382	LOC113739382	LOC113739382	protein_coding	bidirectional sugar transporter SWEET5	transport_membrane
arabica_cultivated__vs__arabica_introgressed::chr_D_sg_C_(Scaffold_1;HRSCAF_2)::sgC	arabica_cultivated__vs__arabica_introgressed	chr_D_sg_C_(Scaffold_1;HRSCAF_2)	4c	gene-LOC113738470	LOC113738470	LOC113738470	protein_coding	RING-H2 finger protein ATL60-like
arabica_cultivated__vs__arabica_introgressed::chr_D_sg_C_(Scaffold_1;HRSCAF_2)::sgC	arabica_cultivated__vs__arabica_introgressed	chr_D_sg_C_(Scaffold_1;HRSCAF_2)	4c	gene-LOC140004704	LOC140004704	LOC140004704	protein_coding	uncharacterized LOC140004704
arabica_cultivated__vs__arabica_introgressed::chr_D_sg_C_(Scaffold_1;HRSCAF_2)::sgC	arabica_cultivated__vs__arabica_introgressed	chr_D_sg_C_(Scaffold_1;HRSCAF_2)	4c	gene-LOC113714157	LOC113714157	LOC113714157	protein_coding	UDP-glycosyltransferase 90A1-like
arabica_cultivated__vs__arabica_introgressed::chr_D_sg_C_(Scaffold_1;HRSCAF_2)::sgC	arabica_cultivated__vs__arabica_introgressed	chr_D_sg_C_(Scaffold_1;HRSCAF_2)	4c	gene-LOC140004705	LOC140004705	LOC140004705	protein_coding	uncharacterized LOC140004705
arabica_cultivated__vs__arabica_introgressed::chr_D_sg_C_(Scaffold_1;HRSCAF_2)::sgC	arabica_cultivated__vs__arabica_introgressed	chr_D_sg_C_(Scaffold_1;HRSCAF_2)	4c	gene-LOC113714158	LOC113714158	LOC113714158	protein_coding	UDP-glycosyltransferase 90A1
arabica_cultivated__vs__arabica_introgressed::chr_D_sg_C_(Scaffold_1;HRSCAF_2)::sgC	arabica_cultivated__vs__arabica_introgressed	chr_D_sg_C_(Scaffold_1;HRSCAF_2)	4c	gene-LOC140004931	LOC140004931	LOC140004931	lncRNA	uncharacterized LOC140004931
arabica_cultivated__vs__arabica_introgressed::chr_D_sg_C_(Scaffold_1;HRSCAF_2)::sgC	arabica_cultivated__vs__arabica_introgressed	chr_D_sg_C_(Scaffold_1;HRSCAF_2)	4c	gene-LOC113739484	LOC113739484	LOC113739484	protein_coding	UDP-glycosyltransferase 90A1-like
arabica_cultivated__vs__arabica_introgressed::chr_D_sg_C_(Scaffold_1;HRSCAF_2)::sgC	arabica_cultivated__vs__arabica_introgressed	chr_D_sg_C_(Scaffold_1;HRSCAF_2)	4c	gene-LOC113739120	LOC113739120	LOC113739120	protein_coding	receptor-like cytosolic serine/threonine-protein kinase RBK2	defense_receptor, kinase_signaling
arabica_cultivated__vs__arabica_introgressed::chr_D_sg_C_(Scaffold_1;HRSCAF_2)::sgC	arabica_cultivated__vs__arabica_introgressed	chr_D_sg_C_(Scaffold_1;HRSCAF_2)	4c	gene-LOC113740004	LOC113740004	LOC113740004	protein_coding	gibberellin 3-beta-dioxygenase 1-like
arabica_cultivated__vs__arabica_introgressed::chr_D_sg_C_(Scaffold_1;HRSCAF_2)::sgC	arabica_cultivated__vs__arabica_introgressed	chr_D_sg_C_(Scaffold_1;HRSCAF_2)	4c	gene-LOC113739121	LOC113739121	LOC113739121	protein_coding	UDP-glycosyltransferase 90A1-like
arabica_cultivated__vs__arabica_introgressed::chr_D_sg_C_(Scaffold_1;HRSCAF_2)::sgC	arabica_cultivated__vs__arabica_introgressed	chr_D_sg_C_(Scaffold_1;HRSCAF_2)	4c	gene-LOC113740348	LOC113740348	LOC113740348	protein_coding	protein DELETION OF SUV3 SUPPRESSOR 1(I)
arabica_cultivated__vs__arabica_introgressed::chr_D_sg_C_(Scaffold_1;HRSCAF_2)::sgC	arabica_cultivated__vs__arabica_introgressed	chr_D_sg_C_(Scaffold_1;HRSCAF_2)	4c	gene-LOC113740470	LOC113740470	LOC113740470	snoRNA	small nucleolar RNA snoR145
arabica_cultivated__vs__arabica_introgressed::chr_D_sg_C_(Scaffold_1;HRSCAF_2)::sgC	arabica_cultivated__vs__arabica_introgressed	chr_D_sg_C_(Scaffold_1;HRSCAF_2)	4c	gene-LOC113740474	LOC113740474	LOC113740474	snoRNA	small nucleolar RNA snoR145
arabica_cultivated__vs__arabica_introgressed::chr_D_sg_C_(Scaffold_1;HRSCAF_2)::sgC	arabica_cultivated__vs__arabica_introgressed	chr_D_sg_C_(Scaffold_1;HRSCAF_2)	4c	gene-LOC113740472	LOC113740472	LOC113740472	snoRNA	small nucleolar RNA snoR145
arabica_cultivated__vs__arabica_introgressed::chr_D_sg_C_(Scaffold_1;HRSCAF_2)::sgC	arabica_cultivated__vs__arabica_introgressed	chr_D_sg_C_(Scaffold_1;HRSCAF_2)	4c	gene-LOC113739508	LOC113739508	LOC113739508	protein_coding	U-box domain-containing protein 19-like
arabica_cultivated__vs__arabica_introgressed::chr_D_sg_C_(Scaffold_1;HRSCAF_2)::sgC	arabica_cultivated__vs__arabica_introgressed	chr_D_sg_C_(Scaffold_1;HRSCAF_2)	4c	gene-LOC113739122	LOC113739122	LOC113739122	protein_coding	aldehyde dehydrogenase family 2 member B4%2C mitochondrial-like
arabica_cultivated__vs__arabica_introgressed::chr_D_sg_C_(Scaffold_1;HRSCAF_2)::sgC	arabica_cultivated__vs__arabica_introgressed	chr_D_sg_C_(Scaffold_1;HRSCAF_2)	4c	gene-LOC113740006	LOC113740006	LOC113740006	protein_coding	benzaldehyde dehydrogenase%2C mitochondrial-like
arabica_cultivated__vs__arabica_introgressed::chr_D_sg_C_(Scaffold_1;HRSCAF_2)::sgC	arabica_cultivated__vs__arabica_introgressed	chr_D_sg_C_(Scaffold_1;HRSCAF_2)	4c	gene-LOC113738688	LOC113738688	LOC113738688	protein_coding	probable cyclic nucleotide-gated ion channel 16	transport_membrane
arabica_cultivated__vs__arabica_introgressed::chr_D_sg_C_(Scaffold_1;HRSCAF_2)::sgC	arabica_cultivated__vs__arabica_introgressed	chr_D_sg_C_(Scaffold_1;HRSCAF_2)	4c	gene-LOC113740007	LOC113740007	LOC113740007	protein_coding	uncharacterized LOC113740007
arabica_cultivated__vs__arabica_introgressed::chr_D_sg_C_(Scaffold_1;HRSCAF_2)::sgC	arabica_cultivated__vs__arabica_introgressed	chr_D_sg_C_(Scaffold_1;HRSCAF_2)	4c	gene-LOC113738777	LOC113738777	LOC113738777	lncRNA	uncharacterized LOC113738777
arabica_cultivated__vs__arabica_introgressed::chr_D_sg_C_(Scaffold_1;HRSCAF_2)::sgC	arabica_cultivated__vs__arabica_introgressed	chr_D_sg_C_(Scaffold_1;HRSCAF_2)	4c	gene-LOC113740270	LOC113740270	LOC113740270	protein_coding	RNA-dependent RNA polymerase 2-like
arabica_cultivated__vs__arabica_introgressed::chr_D_sg_C_(Scaffold_1;HRSCAF_2)::sgC	arabica_cultivated__vs__arabica_introgressed	chr_D_sg_C_(Scaffold_1;HRSCAF_2)	4c	gene-LOC140004706	LOC140004706	LOC140004706	protein_coding	uncharacterized LOC140004706
arabica_cultivated__vs__arabica_introgressed::chr_D_sg_C_(Scaffold_1;HRSCAF_2)::sgC	arabica_cultivated__vs__arabica_introgressed	chr_D_sg_C_(Scaffold_1;HRSCAF_2)	4c	gene-LOC113738766	LOC113738766	LOC113738766	lncRNA	uncharacterized LOC113738766
arabica_cultivated__vs__arabica_introgressed::chr_D_sg_C_(Scaffold_1;HRSCAF_2)::sgC	arabica_cultivated__vs__arabica_introgressed	chr_D_sg_C_(Scaffold_1;HRSCAF_2)	4c	gene-LOC113738493	LOC113738493	LOC113738493	lncRNA	uncharacterized LOC113738493
arabica_cultivated__vs__arabica_introgressed::chr_D_sg_C_(Scaffold_1;HRSCAF_2)::sgC	arabica_cultivated__vs__arabica_introgressed	chr_D_sg_C_(Scaffold_1;HRSCAF_2)	4c	gene-LOC113739945	LOC113739945	LOC113739945	protein_coding	2-isopropylmalate synthase A-like
arabica_cultivated__vs__arabica_introgressed::chr_D_sg_C_(Scaffold_1;HRSCAF_2)::sgC	arabica_cultivated__vs__arabica_introgressed	chr_D_sg_C_(Scaffold_1;HRSCAF_2)	4c	gene-LOC140005308	LOC140005308	LOC140005308	lncRNA	uncharacterized LOC140005308
arabica_cultivated__vs__arabica_introgressed::chr_D_sg_C_(Scaffold_1;HRSCAF_2)::sgC	arabica_cultivated__vs__arabica_introgressed	chr_D_sg_C_(Scaffold_1;HRSCAF_2)	4c	gene-LOC113738364	LOC113738364	LOC113738364	protein_coding	RING-H2 finger protein ATL46-like
arabica_cultivated__vs__arabica_introgressed::chr_D_sg_C_(Scaffold_1;HRSCAF_2)::sgC	arabica_cultivated__vs__arabica_introgressed	chr_D_sg_C_(Scaffold_1;HRSCAF_2)	4c	gene-LOC113738756	LOC113738756	LOC113738756	protein_coding	probable inactive receptor kinase At2g26730	defense_receptor, kinase_signaling
arabica_cultivated__vs__arabica_introgressed::chr_D_sg_C_(Scaffold_1;HRSCAF_2)::sgC	arabica_cultivated__vs__arabica_introgressed	chr_D_sg_C_(Scaffold_1;HRSCAF_2)	4c	gene-LOC113738540	LOC113738540	LOC113738540	protein_coding	ubiquitin-conjugating enzyme E2 5-like
arabica_cultivated__vs__arabica_introgressed::chr_D_sg_C_(Scaffold_1;HRSCAF_2)::sgC	arabica_cultivated__vs__arabica_introgressed	chr_D_sg_C_(Scaffold_1;HRSCAF_2)	4c	gene-LOC140005309	LOC140005309	LOC140005309	lncRNA	uncharacterized LOC140005309
arabica_cultivated__vs__arabica_introgressed::chr_D_sg_C_(Scaffold_1;HRSCAF_2)::sgC	arabica_cultivated__vs__arabica_introgressed	chr_D_sg_C_(Scaffold_1;HRSCAF_2)	4c	gene-LOC113742157	LOC113742157	LOC113742157	protein_coding	protease Do-like 9
arabica_cultivated__vs__arabica_introgressed::chr_D_sg_C_(Scaffold_1;HRSCAF_2)::sgC	arabica_cultivated__vs__arabica_introgressed	chr_D_sg_C_(Scaffold_1;HRSCAF_2)	4c	gene-LOC113738632	LOC113738632	LOC113738632	protein_coding	alpha-N-acetylglucosaminidase
arabica_cultivated__vs__arabica_introgressed::chr_D_sg_C_(Scaffold_1;HRSCAF_2)::sgC	arabica_cultivated__vs__arabica_introgressed	chr_D_sg_C_(Scaffold_1;HRSCAF_2)	4c	gene-LOC113740455	LOC113740455	LOC113740455	lncRNA	uncharacterized LOC113740455
arabica_cultivated__vs__arabica_introgressed::chr_D_sg_C_(Scaffold_1;HRSCAF_2)::sgC	arabica_cultivated__vs__arabica_introgressed	chr_D_sg_C_(Scaffold_1;HRSCAF_2)	4c	gene-LOC113739042	LOC113739042	LOC113739042	protein_coding	uncharacterized LOC113739042
arabica_cultivated__vs__arabica_introgressed::chr_D_sg_C_(Scaffold_1;HRSCAF_2)::sgC	arabica_cultivated__vs__arabica_introgressed	chr_D_sg_C_(Scaffold_1;HRSCAF_2)	4c	gene-LOC113739043	LOC113739043	LOC113739043	protein_coding	uncharacterized LOC113739043
arabica_cultivated__vs__arabica_introgressed::chr_D_sg_C_(Scaffold_1;HRSCAF_2)::sgC	arabica_cultivated__vs__arabica_introgressed	chr_D_sg_C_(Scaffold_1;HRSCAF_2)	4c	gene-LOC113739044	LOC113739044	LOC113739044	protein_coding	uncharacterized LOC113739044
arabica_cultivated__vs__arabica_introgressed::chr_D_sg_C_(Scaffold_1;HRSCAF_2)::sgC	arabica_cultivated__vs__arabica_introgressed	chr_D_sg_C_(Scaffold_1;HRSCAF_2)	4c	gene-LOC140004708	LOC140004708	LOC140004708	protein_coding	uncharacterized LOC140004708
arabica_cultivated__vs__arabica_introgressed::chr_D_sg_C_(Scaffold_1;HRSCAF_2)::sgC	arabica_cultivated__vs__arabica_introgressed	chr_D_sg_C_(Scaffold_1;HRSCAF_2)	4c	gene-LOC113739046	LOC113739046	LOC113739046	protein_coding	uncharacterized LOC113739046
arabica_cultivated__vs__arabica_introgressed::chr_D_sg_C_(Scaffold_1;HRSCAF_2)::sgC	arabica_cultivated__vs__arabica_introgressed	chr_D_sg_C_(Scaffold_1;HRSCAF_2)	4c	gene-LOC113739947	LOC113739947	LOC113739947	protein_coding	rac-like GTP-binding protein 3
arabica_cultivated__vs__arabica_introgressed::chr_D_sg_C_(Scaffold_1;HRSCAF_2)::sgC	arabica_cultivated__vs__arabica_introgressed	chr_D_sg_C_(Scaffold_1;HRSCAF_2)	4c	gene-LOC113739946	LOC113739946	LOC113739946	protein_coding	uncharacterized LOC113739946
arabica_cultivated__vs__arabica_introgressed::chr_D_sg_C_(Scaffold_1;HRSCAF_2)::sgC	arabica_cultivated__vs__arabica_introgressed	chr_D_sg_C_(Scaffold_1;HRSCAF_2)	4c	gene-LOC113740166	LOC113740166	LOC113740166	protein_coding	proteasome subunit alpha type-2-like
arabica_cultivated__vs__arabica_introgressed::chr_D_sg_C_(Scaffold_1;HRSCAF_2)::sgC	arabica_cultivated__vs__arabica_introgressed	chr_D_sg_C_(Scaffold_1;HRSCAF_2)	4c	gene-LOC140005310	LOC140005310	LOC140005310	lncRNA	uncharacterized LOC140005310
arabica_cultivated__vs__arabica_introgressed::chr_D_sg_C_(Scaffold_1;HRSCAF_2)::sgC	arabica_cultivated__vs__arabica_introgressed	chr_D_sg_C_(Scaffold_1;HRSCAF_2)	4c	gene-LOC113739949	LOC113739949	LOC113739949	protein_coding	nucleobase-ascorbate transporter 6	transport_membrane
arabica_cultivated__vs__arabica_introgressed::chr_D_sg_C_(Scaffold_1;HRSCAF_2)::sgC	arabica_cultivated__vs__arabica_introgressed	chr_D_sg_C_(Scaffold_1;HRSCAF_2)	4c	gene-LOC113738654	LOC113738654	LOC113738654	protein_coding	uncharacterized LOC113738654
arabica_cultivated__vs__arabica_introgressed::chr_D_sg_C_(Scaffold_1;HRSCAF_2)::sgC	arabica_cultivated__vs__arabica_introgressed	chr_D_sg_C_(Scaffold_1;HRSCAF_2)	4c	gene-LOC113739950	LOC113739950	LOC113739950	protein_coding	SUPPRESSOR OF ABI3-5
arabica_cultivated__vs__arabica_introgressed::chr_D_sg_C_(Scaffold_1;HRSCAF_2)::sgC	arabica_cultivated__vs__arabica_introgressed	chr_D_sg_C_(Scaffold_1;HRSCAF_2)	4c	gene-LOC113739051	LOC113739051	LOC113739051	protein_coding	putative F-box protein At1g67623
arabica_cultivated__vs__arabica_introgressed::chr_D_sg_C_(Scaffold_1;HRSCAF_2)::sgC	arabica_cultivated__vs__arabica_introgressed	chr_D_sg_C_(Scaffold_1;HRSCAF_2)	4c	gene-LOC113739052	LOC113739052	LOC113739052	protein_coding	protein MAIN-LIKE 2-like
arabica_cultivated__vs__arabica_introgressed::chr_D_sg_C_(Scaffold_1;HRSCAF_2)::sgC	arabica_cultivated__vs__arabica_introgressed	chr_D_sg_C_(Scaffold_1;HRSCAF_2)	4c	gene-LOC113739053	LOC113739053	LOC113739053	protein_coding	protein FAR1-RELATED SEQUENCE 5-like
arabica_cultivated__vs__arabica_introgressed::chr_D_sg_C_(Scaffold_1;HRSCAF_2)::sgC	arabica_cultivated__vs__arabica_introgressed	chr_D_sg_C_(Scaffold_1;HRSCAF_2)	4c	gene-LOC113739460	LOC113739460	LOC113739460	protein_coding	ankyrin repeat-containing protein BDA1-like
arabica_cultivated__vs__arabica_introgressed::chr_D_sg_C_(Scaffold_1;HRSCAF_2)::sgC	arabica_cultivated__vs__arabica_introgressed	chr_D_sg_C_(Scaffold_1;HRSCAF_2)	4c	gene-LOC113739442	LOC113739442	LOC113739442	protein_coding	LIM domain-containing protein WLIM1
arabica_cultivated__vs__arabica_introgressed::chr_D_sg_C_(Scaffold_1;HRSCAF_2)::sgC	arabica_cultivated__vs__arabica_introgressed	chr_D_sg_C_(Scaffold_1;HRSCAF_2)	4c	gene-LOC140005311	LOC140005311	LOC140005311	protein_coding	succinate dehydrogenase subunit 7B%2C mitochondrial-like
arabica_cultivated__vs__arabica_introgressed::chr_D_sg_C_(Scaffold_1;HRSCAF_2)::sgC	arabica_cultivated__vs__arabica_introgressed	chr_D_sg_C_(Scaffold_1;HRSCAF_2)	4c	gene-LOC113740494	LOC113740494	LOC113740494	snoRNA	small nucleolar RNA R71
arabica_cultivated__vs__arabica_introgressed::chr_D_sg_C_(Scaffold_1;HRSCAF_2)::sgC	arabica_cultivated__vs__arabica_introgressed	chr_D_sg_C_(Scaffold_1;HRSCAF_2)	4c	gene-LOC140004932	LOC140004932	LOC140004932	lncRNA	uncharacterized LOC140004932
arabica_cultivated__vs__arabica_introgressed::chr_D_sg_C_(Scaffold_1;HRSCAF_2)::sgC	arabica_cultivated__vs__arabica_introgressed	chr_D_sg_C_(Scaffold_1;HRSCAF_2)	4c	gene-LOC113738593	LOC113738593	LOC113738593	lncRNA	uncharacterized LOC113738593
arabica_cultivated__vs__arabica_introgressed::chr_D_sg_C_(Scaffold_1;HRSCAF_2)::sgC	arabica_cultivated__vs__arabica_introgressed	chr_D_sg_C_(Scaffold_1;HRSCAF_2)	4c	gene-LOC113738565	LOC113738565	LOC113738565	protein_coding	uncharacterized protein At5g50100%2C chloroplastic-like
arabica_cultivated__vs__arabica_introgressed::chr_D_sg_C_(Scaffold_1;HRSCAF_2)::sgC	arabica_cultivated__vs__arabica_introgressed	chr_D_sg_C_(Scaffold_1;HRSCAF_2)	4c	gene-LOC113739445	LOC113739445	LOC113739445	protein_coding	calmodulin-binding protein 60 A-like	kinase_signaling
arabica_cultivated__vs__arabica_introgressed::chr_D_sg_C_(Scaffold_1;HRSCAF_2)::sgC	arabica_cultivated__vs__arabica_introgressed	chr_D_sg_C_(Scaffold_1;HRSCAF_2)	4c	gene-LOC113739056	LOC113739056	LOC113739056	protein_coding	zinc finger BED domain-containing protein RICESLEEPER 1-like
arabica_cultivated__vs__arabica_introgressed::chr_D_sg_C_(Scaffold_1;HRSCAF_2)::sgC	arabica_cultivated__vs__arabica_introgressed	chr_D_sg_C_(Scaffold_1;HRSCAF_2)	4c	gene-LOC140005312	LOC140005312	LOC140005312	lncRNA	uncharacterized LOC140005312
arabica_cultivated__vs__arabica_introgressed::chr_D_sg_C_(Scaffold_1;HRSCAF_2)::sgC	arabica_cultivated__vs__arabica_introgressed	chr_D_sg_C_(Scaffold_1;HRSCAF_2)	4c	gene-LOC113739944	LOC113739944	LOC113739944	protein_coding	probable 2-oxoglutarate-dependent dioxygenase AOP1
arabica_cultivated__vs__arabica_introgressed::chr_D_sg_C_(Scaffold_1;HRSCAF_2)::sgC	arabica_cultivated__vs__arabica_introgressed	chr_D_sg_C_(Scaffold_1;HRSCAF_2)	4c	gene-LOC113740491	LOC113740491	LOC113740491	snoRNA	small nucleolar RNA R71
arabica_cultivated__vs__arabica_introgressed::chr_D_sg_C_(Scaffold_1;HRSCAF_2)::sgC	arabica_cultivated__vs__arabica_introgressed	chr_D_sg_C_(Scaffold_1;HRSCAF_2)	4c	gene-LOC113739057	LOC113739057	LOC113739057	protein_coding	uncharacterized LOC113739057
arabica_cultivated__vs__arabica_introgressed::chr_D_sg_C_(Scaffold_1;HRSCAF_2)::sgC	arabica_cultivated__vs__arabica_introgressed	chr_D_sg_C_(Scaffold_1;HRSCAF_2)	4c	gene-LOC113738836	LOC113738836	LOC113738836	protein_coding	calmodulin-binding protein 60 A	kinase_signaling
arabica_cultivated__vs__arabica_introgressed::chr_D_sg_C_(Scaffold_1;HRSCAF_2)::sgC	arabica_cultivated__vs__arabica_introgressed	chr_D_sg_C_(Scaffold_1;HRSCAF_2)	4c	gene-LOC113740499	LOC113740499	LOC113740499	snoRNA	small nucleolar RNA R71
arabica_cultivated__vs__arabica_introgressed::chr_D_sg_C_(Scaffold_1;HRSCAF_2)::sgC	arabica_cultivated__vs__arabica_introgressed	chr_D_sg_C_(Scaffold_1;HRSCAF_2)	4c	gene-LOC113740510	LOC113740510	LOC113740510	snoRNA	small nucleolar RNA R71
arabica_cultivated__vs__arabica_introgressed::chr_D_sg_C_(Scaffold_1;HRSCAF_2)::sgC	arabica_cultivated__vs__arabica_introgressed	chr_D_sg_C_(Scaffold_1;HRSCAF_2)	4c	gene-LOC113739058	LOC113739058	LOC113739058	protein_coding	zinc finger BED domain-containing protein RICESLEEPER 2-like
arabica_cultivated__vs__arabica_introgressed::chr_D_sg_C_(Scaffold_1;HRSCAF_2)::sgC	arabica_cultivated__vs__arabica_introgressed	chr_D_sg_C_(Scaffold_1;HRSCAF_2)	4c	gene-LOC113739059	LOC113739059	LOC113739059	protein_coding	uncharacterized LOC113739059
arabica_cultivated__vs__arabica_introgressed::chr_D_sg_C_(Scaffold_1;HRSCAF_2)::sgC	arabica_cultivated__vs__arabica_introgressed	chr_D_sg_C_(Scaffold_1;HRSCAF_2)	4c	gene-LOC113740236	LOC113740236	LOC113740236	protein_coding	uncharacterized LOC113740236
arabica_cultivated__vs__arabica_introgressed::chr_D_sg_C_(Scaffold_1;HRSCAF_2)::sgC	arabica_cultivated__vs__arabica_introgressed	chr_D_sg_C_(Scaffold_1;HRSCAF_2)	4c	gene-LOC113740235	LOC113740235	LOC113740235	protein_coding	ADP%2CATP carrier protein ER-ANT1
arabica_cultivated__vs__arabica_introgressed::chr_D_sg_C_(Scaffold_1;HRSCAF_2)::sgC	arabica_cultivated__vs__arabica_introgressed	chr_D_sg_C_(Scaffold_1;HRSCAF_2)	4c	gene-LOC140004933	LOC140004933	LOC140004933	lncRNA	uncharacterized LOC140004933
arabica_cultivated__vs__arabica_introgressed::chr_D_sg_C_(Scaffold_1;HRSCAF_2)::sgC	arabica_cultivated__vs__arabica_introgressed	chr_D_sg_C_(Scaffold_1;HRSCAF_2)	4c	gene-LOC113738466	LOC113738466	LOC113738466	protein_coding	calmodulin-binding protein 60 A-like	kinase_signaling
arabica_cultivated__vs__arabica_introgressed::chr_D_sg_C_(Scaffold_1;HRSCAF_2)::sgC	arabica_cultivated__vs__arabica_introgressed	chr_D_sg_C_(Scaffold_1;HRSCAF_2)	4c	gene-LOC113739480	LOC113739480	LOC113739480	protein_coding	calmodulin-binding protein 60 G-like	kinase_signaling
arabica_cultivated__vs__arabica_introgressed::chr_D_sg_C_(Scaffold_1;HRSCAF_2)::sgC	arabica_cultivated__vs__arabica_introgressed	chr_D_sg_C_(Scaffold_1;HRSCAF_2)	4c	gene-LOC113739955	LOC113739955	LOC113739955	protein_coding	calmodulin-binding protein 60 B-like	kinase_signaling
arabica_cultivated__vs__arabica_introgressed::chr_D_sg_C_(Scaffold_1;HRSCAF_2)::sgC	arabica_cultivated__vs__arabica_introgressed	chr_D_sg_C_(Scaffold_1;HRSCAF_2)	4c	gene-LOC113738793	LOC113738793	LOC113738793	protein_coding	UDP-glycosyltransferase 74B1-like
arabica_cultivated__vs__arabica_introgressed::chr_D_sg_C_(Scaffold_1;HRSCAF_2)::sgC	arabica_cultivated__vs__arabica_introgressed	chr_D_sg_C_(Scaffold_1;HRSCAF_2)	4c	gene-LOC113739061	LOC113739061	LOC113739061	protein_coding	uncharacterized LOC113739061
arabica_cultivated__vs__arabica_introgressed::chr_D_sg_C_(Scaffold_1;HRSCAF_2)::sgC	arabica_cultivated__vs__arabica_introgressed	chr_D_sg_C_(Scaffold_1;HRSCAF_2)	4c	gene-LOC113739062	LOC113739062	LOC113739062	protein_coding	uncharacterized LOC113739062
arabica_cultivated__vs__arabica_introgressed::chr_D_sg_C_(Scaffold_1;HRSCAF_2)::sgC	arabica_cultivated__vs__arabica_introgressed	chr_D_sg_C_(Scaffold_1;HRSCAF_2)	4c	gene-LOC113739956	LOC113739956	LOC113739956	protein_coding	calmodulin-binding protein 60 A-like	kinase_signaling
arabica_cultivated__vs__arabica_introgressed::chr_D_sg_C_(Scaffold_1;HRSCAF_2)::sgC	arabica_cultivated__vs__arabica_introgressed	chr_D_sg_C_(Scaffold_1;HRSCAF_2)	4c	gene-LOC113738446	LOC113738446	LOC113738446	lncRNA	uncharacterized LOC113738446
arabica_cultivated__vs__arabica_introgressed::chr_D_sg_C_(Scaffold_1;HRSCAF_2)::sgC	arabica_cultivated__vs__arabica_introgressed	chr_D_sg_C_(Scaffold_1;HRSCAF_2)	4c	gene-LOC113739415	LOC113739415	LOC113739415	misc_RNA	uncharacterized LOC113739415
arabica_cultivated__vs__arabica_introgressed::chr_D_sg_C_(Scaffold_1;HRSCAF_2)::sgC	arabica_cultivated__vs__arabica_introgressed	chr_D_sg_C_(Scaffold_1;HRSCAF_2)	4c	gene-LOC113739411	LOC113739411	LOC113739411	protein_coding	uncharacterized LOC113739411
arabica_cultivated__vs__arabica_introgressed::chr_D_sg_C_(Scaffold_1;HRSCAF_2)::sgC	arabica_cultivated__vs__arabica_introgressed	chr_D_sg_C_(Scaffold_1;HRSCAF_2)	4c	gene-LOC113739474	LOC113739474	LOC113739474	protein_coding	receptor kinase-like protein Xa21	defense_receptor, kinase_signaling
arabica_cultivated__vs__arabica_introgressed::chr_D_sg_C_(Scaffold_1;HRSCAF_2)::sgC	arabica_cultivated__vs__arabica_introgressed	chr_D_sg_C_(Scaffold_1;HRSCAF_2)	4c	gene-LOC140004710	LOC140004710	LOC140004710	protein_coding	uncharacterized LOC140004710
arabica_cultivated__vs__arabica_introgressed::chr_D_sg_C_(Scaffold_1;HRSCAF_2)::sgC	arabica_cultivated__vs__arabica_introgressed	chr_D_sg_C_(Scaffold_1;HRSCAF_2)	4c	gene-LOC140005314	LOC140005314	LOC140005314	protein_coding	uncharacterized LOC140005314
arabica_cultivated__vs__arabica_introgressed::chr_D_sg_C_(Scaffold_1;HRSCAF_2)::sgC	arabica_cultivated__vs__arabica_introgressed	chr_D_sg_C_(Scaffold_1;HRSCAF_2)	4c	gene-LOC113739969	LOC113739969	LOC113739969	protein_coding	uncharacterized LOC113739969
arabica_cultivated__vs__arabica_introgressed::chr_D_sg_C_(Scaffold_1;HRSCAF_2)::sgC	arabica_cultivated__vs__arabica_introgressed	chr_D_sg_C_(Scaffold_1;HRSCAF_2)	4c	gene-LOC113739970	LOC113739970	LOC113739970	lncRNA	uncharacterized LOC113739970
arabica_cultivated__vs__arabica_introgressed::chr_D_sg_C_(Scaffold_1;HRSCAF_2)::sgC	arabica_cultivated__vs__arabica_introgressed	chr_D_sg_C_(Scaffold_1;HRSCAF_2)	4c	gene-LOC113740524	LOC113740524	LOC113740524	snRNA	U6atac minor spliceosomal RNA
arabica_cultivated__vs__arabica_introgressed::chr_D_sg_C_(Scaffold_1;HRSCAF_2)::sgC	arabica_cultivated__vs__arabica_introgressed	chr_D_sg_C_(Scaffold_1;HRSCAF_2)	4c	gene-LOC113738515	LOC113738515	LOC113738515	protein_coding	uncharacterized LOC113738515
arabica_cultivated__vs__arabica_introgressed::chr_D_sg_C_(Scaffold_1;HRSCAF_2)::sgC	arabica_cultivated__vs__arabica_introgressed	chr_D_sg_C_(Scaffold_1;HRSCAF_2)	4c	gene-LOC113739373	LOC113739373	LOC113739373	protein_coding	protein SWOLLEN 1-like
arabica_cultivated__vs__arabica_introgressed::chr_D_sg_C_(Scaffold_1;HRSCAF_2)::sgC	arabica_cultivated__vs__arabica_introgressed	chr_D_sg_C_(Scaffold_1;HRSCAF_2)	4c	gene-LOC113739064	LOC113739064	LOC113739064	protein_coding	uncharacterized LOC113739064
arabica_cultivated__vs__arabica_introgressed::chr_D_sg_C_(Scaffold_1;HRSCAF_2)::sgC	arabica_cultivated__vs__arabica_introgressed	chr_D_sg_C_(Scaffold_1;HRSCAF_2)	4c	gene-LOC113740011	LOC113740011	LOC113740011	protein_coding	protein MOS2-like
arabica_cultivated__vs__arabica_introgressed::chr_D_sg_C_(Scaffold_1;HRSCAF_2)::sgC	arabica_cultivated__vs__arabica_introgressed	chr_D_sg_C_(Scaffold_1;HRSCAF_2)	4c	gene-LOC140004711	LOC140004711	LOC140004711	protein_coding	uncharacterized LOC140004711
arabica_cultivated__vs__arabica_introgressed::chr_D_sg_C_(Scaffold_1;HRSCAF_2)::sgC	arabica_cultivated__vs__arabica_introgressed	chr_D_sg_C_(Scaffold_1;HRSCAF_2)	4c	gene-LOC113739065	LOC113739065	LOC113739065	protein_coding	uncharacterized LOC113739065
arabica_cultivated__vs__arabica_introgressed::chr_D_sg_C_(Scaffold_1;HRSCAF_2)::sgC	arabica_cultivated__vs__arabica_introgressed	chr_D_sg_C_(Scaffold_1;HRSCAF_2)	4c	gene-LOC113738782	LOC113738782	LOC113738782	lncRNA	uncharacterized LOC113738782
arabica_cultivated__vs__arabica_introgressed::chr_D_sg_C_(Scaffold_1;HRSCAF_2)::sgC	arabica_cultivated__vs__arabica_introgressed	chr_D_sg_C_(Scaffold_1;HRSCAF_2)	4c	gene-LOC113738781	LOC113738781	LOC113738781	protein_coding	G-type lectin S-receptor-like serine/threonine-protein kinase At4g03230	defense_receptor, kinase_signaling
arabica_cultivated__vs__arabica_introgressed::chr_D_sg_C_(Scaffold_1;HRSCAF_2)::sgC	arabica_cultivated__vs__arabica_introgressed	chr_D_sg_C_(Scaffold_1;HRSCAF_2)	4c	gene-LOC113738773	LOC113738773	LOC113738773	protein_coding	uncharacterized LOC113738773
arabica_cultivated__vs__arabica_introgressed::chr_D_sg_C_(Scaffold_1;HRSCAF_2)::sgC	arabica_cultivated__vs__arabica_introgressed	chr_D_sg_C_(Scaffold_1;HRSCAF_2)	4c	gene-LOC113739963	LOC113739963	LOC113739963	protein_coding	protein MOS2
arabica_cultivated__vs__arabica_introgressed::chr_D_sg_C_(Scaffold_1;HRSCAF_2)::sgC	arabica_cultivated__vs__arabica_introgressed	chr_D_sg_C_(Scaffold_1;HRSCAF_2)	4c	gene-LOC113740218	LOC113740218	LOC113740218	protein_coding	alpha-mannosidase I MNS5
arabica_cultivated__vs__arabica_introgressed::chr_D_sg_C_(Scaffold_1;HRSCAF_2)::sgC	arabica_cultivated__vs__arabica_introgressed	chr_D_sg_C_(Scaffold_1;HRSCAF_2)	4c	gene-LOC113739066	LOC113739066	LOC113739066	protein_coding	peroxidase 41-like
arabica_cultivated__vs__arabica_introgressed::chr_D_sg_C_(Scaffold_1;HRSCAF_2)::sgC	arabica_cultivated__vs__arabica_introgressed	chr_D_sg_C_(Scaffold_1;HRSCAF_2)	4c	gene-LOC113740075	LOC113740075	LOC113740075	protein_coding	putative DNA glycosylase At3g47830
arabica_cultivated__vs__arabica_introgressed::chr_D_sg_C_(Scaffold_1;HRSCAF_2)::sgC	arabica_cultivated__vs__arabica_introgressed	chr_D_sg_C_(Scaffold_1;HRSCAF_2)	4c	gene-LOC113739068	LOC113739068	LOC113739068	protein_coding	uncharacterized LOC113739068
arabica_cultivated__vs__arabica_introgressed::chr_D_sg_C_(Scaffold_1;HRSCAF_2)::sgC	arabica_cultivated__vs__arabica_introgressed	chr_D_sg_C_(Scaffold_1;HRSCAF_2)	4c	gene-LOC140005315	LOC140005315	LOC140005315	protein_coding	uncharacterized LOC140005315
arabica_cultivated__vs__arabica_introgressed::chr_D_sg_C_(Scaffold_1;HRSCAF_2)::sgC	arabica_cultivated__vs__arabica_introgressed	chr_D_sg_C_(Scaffold_1;HRSCAF_2)	4c	gene-LOC113739069	LOC113739069	LOC113739069	protein_coding	uncharacterized LOC113739069
arabica_cultivated__vs__arabica_introgressed::chr_D_sg_C_(Scaffold_1;HRSCAF_2)::sgC	arabica_cultivated__vs__arabica_introgressed	chr_D_sg_C_(Scaffold_1;HRSCAF_2)	4c	gene-LOC113740427	LOC113740427	LOC113740427	protein_coding	uncharacterized LOC113740427
arabica_cultivated__vs__arabica_introgressed::chr_D_sg_C_(Scaffold_1;HRSCAF_2)::sgC	arabica_cultivated__vs__arabica_introgressed	chr_D_sg_C_(Scaffold_1;HRSCAF_2)	4c	gene-LOC113740213	LOC113740213	LOC113740213	protein_coding	U-box domain-containing protein 40
arabica_cultivated__vs__arabica_introgressed::chr_D_sg_C_(Scaffold_1;HRSCAF_2)::sgC	arabica_cultivated__vs__arabica_introgressed	chr_D_sg_C_(Scaffold_1;HRSCAF_2)	4c	gene-LOC140004935	LOC140004935	LOC140004935	lncRNA	uncharacterized LOC140004935
arabica_cultivated__vs__arabica_introgressed::chr_D_sg_C_(Scaffold_1;HRSCAF_2)::sgC	arabica_cultivated__vs__arabica_introgressed	chr_D_sg_C_(Scaffold_1;HRSCAF_2)	4c	gene-LOC113738387	LOC113738387	LOC113738387	protein_coding	uncharacterized LOC113738387
arabica_cultivated__vs__arabica_introgressed::chr_D_sg_C_(Scaffold_1;HRSCAF_2)::sgC	arabica_cultivated__vs__arabica_introgressed	chr_D_sg_C_(Scaffold_1;HRSCAF_2)	4c	gene-LOC113738386	LOC113738386	LOC113738386	protein_coding	protein JINGUBANG-like
arabica_cultivated__vs__arabica_introgressed::chr_D_sg_C_(Scaffold_1;HRSCAF_2)::sgC	arabica_cultivated__vs__arabica_introgressed	chr_D_sg_C_(Scaffold_1;HRSCAF_2)	4c	gene-LOC113739986	LOC113739986	LOC113739986	protein_coding	pyridoxine/pyridoxamine 5'-phosphate oxidase 1%2C chloroplastic
arabica_cultivated__vs__arabica_introgressed::chr_D_sg_C_(Scaffold_1;HRSCAF_2)::sgC	arabica_cultivated__vs__arabica_introgressed	chr_D_sg_C_(Scaffold_1;HRSCAF_2)	4c	gene-LOC113739072	LOC113739072	LOC113739072	protein_coding	uncharacterized LOC113739072
arabica_cultivated__vs__arabica_introgressed::chr_D_sg_C_(Scaffold_1;HRSCAF_2)::sgC	arabica_cultivated__vs__arabica_introgressed	chr_D_sg_C_(Scaffold_1;HRSCAF_2)	4c	gene-LOC113739965	LOC113739965	LOC113739965	protein_coding	aminoaldehyde dehydrogenase 2%2C peroxisomal-like
arabica_cultivated__vs__arabica_introgressed::chr_D_sg_C_(Scaffold_1;HRSCAF_2)::sgC	arabica_cultivated__vs__arabica_introgressed	chr_D_sg_C_(Scaffold_1;HRSCAF_2)	4c	gene-LOC113739966	LOC113739966	LOC113739966	protein_coding	uncharacterized LOC113739966
arabica_cultivated__vs__arabica_introgressed::chr_D_sg_C_(Scaffold_1;HRSCAF_2)::sgC	arabica_cultivated__vs__arabica_introgressed	chr_D_sg_C_(Scaffold_1;HRSCAF_2)	4c	gene-LOC113739073	LOC113739073	LOC113739073	protein_coding	zinc finger BED domain-containing protein RICESLEEPER 2-like
arabica_cultivated__vs__arabica_introgressed::chr_D_sg_C_(Scaffold_1;HRSCAF_2)::sgC	arabica_cultivated__vs__arabica_introgressed	chr_D_sg_C_(Scaffold_1;HRSCAF_2)	4c	gene-LOC113739074	LOC113739074	LOC113739074	protein_coding	uncharacterized LOC113739074
arabica_cultivated__vs__arabica_introgressed::chr_D_sg_C_(Scaffold_1;HRSCAF_2)::sgC	arabica_cultivated__vs__arabica_introgressed	chr_D_sg_C_(Scaffold_1;HRSCAF_2)	4c	gene-LOC113738507	LOC113738507	LOC113738507	protein_coding	large ribosomal subunit protein uL18c-like
arabica_cultivated__vs__arabica_introgressed::chr_D_sg_C_(Scaffold_1;HRSCAF_2)::sgC	arabica_cultivated__vs__arabica_introgressed	chr_D_sg_C_(Scaffold_1;HRSCAF_2)	4c	gene-LOC113739075	LOC113739075	LOC113739075	protein_coding	uncharacterized LOC113739075
arabica_cultivated__vs__arabica_introgressed::chr_D_sg_C_(Scaffold_1;HRSCAF_2)::sgC	arabica_cultivated__vs__arabica_introgressed	chr_D_sg_C_(Scaffold_1;HRSCAF_2)	4c	gene-LOC140004713	LOC140004713	LOC140004713	protein_coding	uncharacterized LOC140004713
arabica_cultivated__vs__arabica_introgressed::chr_D_sg_C_(Scaffold_1;HRSCAF_2)::sgC	arabica_cultivated__vs__arabica_introgressed	chr_D_sg_C_(Scaffold_1;HRSCAF_2)	4c	gene-LOC113739971	LOC113739971	LOC113739971	protein_coding	uncharacterized LOC113739971
arabica_cultivated__vs__arabica_introgressed::chr_D_sg_C_(Scaffold_1;HRSCAF_2)::sgC	arabica_cultivated__vs__arabica_introgressed	chr_D_sg_C_(Scaffold_1;HRSCAF_2)	4c	gene-LOC140005316	LOC140005316	LOC140005316	lncRNA	uncharacterized LOC140005316
arabica_cultivated__vs__arabica_introgressed::chr_D_sg_C_(Scaffold_1;HRSCAF_2)::sgC	arabica_cultivated__vs__arabica_introgressed	chr_D_sg_C_(Scaffold_1;HRSCAF_2)	4c	gene-LOC140004936	LOC140004936	LOC140004936	lncRNA	uncharacterized LOC140004936
arabica_cultivated__vs__arabica_introgressed::chr_D_sg_C_(Scaffold_1;HRSCAF_2)::sgC	arabica_cultivated__vs__arabica_introgressed	chr_D_sg_C_(Scaffold_1;HRSCAF_2)	4c	gene-LOC140004714	LOC140004714	LOC140004714	protein_coding	uncharacterized LOC140004714
arabica_cultivated__vs__arabica_introgressed::chr_D_sg_C_(Scaffold_1;HRSCAF_2)::sgC	arabica_cultivated__vs__arabica_introgressed	chr_D_sg_C_(Scaffold_1;HRSCAF_2)	4c	gene-LOC113739972	LOC113739972	LOC113739972	protein_coding	ABC transporter G family member 11	transport_membrane
arabica_cultivated__vs__arabica_introgressed::chr_D_sg_C_(Scaffold_1;HRSCAF_2)::sgC	arabica_cultivated__vs__arabica_introgressed	chr_D_sg_C_(Scaffold_1;HRSCAF_2)	4c	gene-LOC140005317	LOC140005317	LOC140005317	lncRNA	uncharacterized LOC140005317
arabica_cultivated__vs__arabica_introgressed::chr_D_sg_C_(Scaffold_1;HRSCAF_2)::sgC	arabica_cultivated__vs__arabica_introgressed	chr_D_sg_C_(Scaffold_1;HRSCAF_2)	4c	gene-LOC140005318	LOC140005318	LOC140005318	lncRNA	uncharacterized LOC140005318
arabica_cultivated__vs__arabica_introgressed::chr_D_sg_C_(Scaffold_1;HRSCAF_2)::sgC	arabica_cultivated__vs__arabica_introgressed	chr_D_sg_C_(Scaffold_1;HRSCAF_2)	4c	gene-LOC113738643	LOC113738643	LOC113738643	protein_coding	rhomboid-like protein 14%2C mitochondrial
arabica_cultivated__vs__arabica_introgressed::chr_D_sg_C_(Scaffold_1;HRSCAF_2)::sgC	arabica_cultivated__vs__arabica_introgressed	chr_D_sg_C_(Scaffold_1;HRSCAF_2)	4c	gene-LOC140005319	LOC140005319	LOC140005319	lncRNA	uncharacterized LOC140005319
arabica_cultivated__vs__arabica_introgressed::chr_D_sg_C_(Scaffold_1;HRSCAF_2)::sgC	arabica_cultivated__vs__arabica_introgressed	chr_D_sg_C_(Scaffold_1;HRSCAF_2)	4c	gene-LOC113740457	LOC113740457	LOC113740457	protein_coding	alpha-galactosidase
arabica_cultivated__vs__arabica_introgressed::chr_D_sg_C_(Scaffold_1;HRSCAF_2)::sgC	arabica_cultivated__vs__arabica_introgressed	chr_D_sg_C_(Scaffold_1;HRSCAF_2)	4c	gene-LOC140004937	LOC140004937	LOC140004937	lncRNA	uncharacterized LOC140004937
arabica_cultivated__vs__arabica_introgressed::chr_D_sg_C_(Scaffold_1;HRSCAF_2)::sgC	arabica_cultivated__vs__arabica_introgressed	chr_D_sg_C_(Scaffold_1;HRSCAF_2)	4c	gene-LOC140004938	LOC140004938	LOC140004938	lncRNA	uncharacterized LOC140004938
arabica_cultivated__vs__arabica_introgressed::chr_D_sg_C_(Scaffold_1;HRSCAF_2)::sgC	arabica_cultivated__vs__arabica_introgressed	chr_D_sg_C_(Scaffold_1;HRSCAF_2)	4c	gene-LOC140004939	LOC140004939	LOC140004939	lncRNA	uncharacterized LOC140004939
arabica_cultivated__vs__arabica_introgressed::chr_D_sg_C_(Scaffold_1;HRSCAF_2)::sgC	arabica_cultivated__vs__arabica_introgressed	chr_D_sg_C_(Scaffold_1;HRSCAF_2)	4c	gene-LOC140004715	LOC140004715	LOC140004715	protein_coding	uncharacterized LOC140004715
arabica_cultivated__vs__arabica_introgressed::chr_D_sg_C_(Scaffold_1;HRSCAF_2)::sgC	arabica_cultivated__vs__arabica_introgressed	chr_D_sg_C_(Scaffold_1;HRSCAF_2)	4c	gene-LOC140004716	LOC140004716	LOC140004716	protein_coding	uncharacterized LOC140004716
arabica_cultivated__vs__arabica_introgressed::chr_D_sg_C_(Scaffold_1;HRSCAF_2)::sgC	arabica_cultivated__vs__arabica_introgressed	chr_D_sg_C_(Scaffold_1;HRSCAF_2)	4c	gene-LOC140004718	LOC140004718	LOC140004718	protein_coding	uncharacterized LOC140004718
arabica_cultivated__vs__arabica_introgressed::chr_D_sg_C_(Scaffold_1;HRSCAF_2)::sgC	arabica_cultivated__vs__arabica_introgressed	chr_D_sg_C_(Scaffold_1;HRSCAF_2)	4c	gene-LOC113739092	LOC113739092	LOC113739092	protein_coding	uncharacterized LOC113739092
arabica_cultivated__vs__arabica_introgressed::chr_D_sg_C_(Scaffold_1;HRSCAF_2)::sgC	arabica_cultivated__vs__arabica_introgressed	chr_D_sg_C_(Scaffold_1;HRSCAF_2)	4c	gene-LOC140005320	LOC140005320	LOC140005320	lncRNA	uncharacterized LOC140005320
arabica_cultivated__vs__arabica_introgressed::chr_D_sg_C_(Scaffold_1;HRSCAF_2)::sgC	arabica_cultivated__vs__arabica_introgressed	chr_D_sg_C_(Scaffold_1;HRSCAF_2)	4c	gene-LOC113739090	LOC113739090	LOC113739090	protein_coding	nucleolar GTP-binding protein 1-like
arabica_cultivated__vs__arabica_introgressed::chr_D_sg_C_(Scaffold_1;HRSCAF_2)::sgC	arabica_cultivated__vs__arabica_introgressed	chr_D_sg_C_(Scaffold_1;HRSCAF_2)	4c	gene-LOC140004719	LOC140004719	LOC140004719	protein_coding	replication protein A 70 kDa DNA-binding subunit B-like
arabica_cultivated__vs__arabica_introgressed::chr_D_sg_C_(Scaffold_1;HRSCAF_2)::sgC	arabica_cultivated__vs__arabica_introgressed	chr_D_sg_C_(Scaffold_1;HRSCAF_2)	4c	gene-LOC113740446	LOC113740446	LOC113740446	protein_coding	uncharacterized LOC113740446
arabica_cultivated__vs__arabica_introgressed::chr_D_sg_C_(Scaffold_1;HRSCAF_2)::sgC	arabica_cultivated__vs__arabica_introgressed	chr_D_sg_C_(Scaffold_1;HRSCAF_2)	4c	gene-LOC113739081	LOC113739081	LOC113739081	protein_coding	uncharacterized LOC113739081
arabica_cultivated__vs__arabica_introgressed::chr_D_sg_C_(Scaffold_1;HRSCAF_2)::sgC	arabica_cultivated__vs__arabica_introgressed	chr_D_sg_C_(Scaffold_1;HRSCAF_2)	4c	gene-LOC140004721	LOC140004721	LOC140004721	protein_coding	uncharacterized LOC140004721
arabica_cultivated__vs__arabica_introgressed::chr_D_sg_C_(Scaffold_1;HRSCAF_2)::sgC	arabica_cultivated__vs__arabica_introgressed	chr_D_sg_C_(Scaffold_1;HRSCAF_2)	4c	gene-LOC113739514	LOC113739514	LOC113739514	protein_coding	probable aquaporin TIP3-2
arabica_cultivated__vs__arabica_introgressed::chr_D_sg_C_(Scaffold_1;HRSCAF_2)::sgC	arabica_cultivated__vs__arabica_introgressed	chr_D_sg_C_(Scaffold_1;HRSCAF_2)	4c	gene-LOC113739083	LOC113739083	LOC113739083	protein_coding	probable leucine-rich repeat receptor-like protein kinase At1g68400	defense_receptor, kinase_signaling
arabica_cultivated__vs__arabica_introgressed::chr_D_sg_C_(Scaffold_1;HRSCAF_2)::sgC	arabica_cultivated__vs__arabica_introgressed	chr_D_sg_C_(Scaffold_1;HRSCAF_2)	4c	gene-LOC140005321	LOC140005321	LOC140005321	lncRNA	uncharacterized LOC140005321
arabica_cultivated__vs__arabica_introgressed::chr_D_sg_C_(Scaffold_1;HRSCAF_2)::sgC	arabica_cultivated__vs__arabica_introgressed	chr_D_sg_C_(Scaffold_1;HRSCAF_2)	4c	gene-LOC113738655	LOC113738655	LOC113738655	protein_coding	uncharacterized LOC113738655
arabica_cultivated__vs__arabica_introgressed::chr_D_sg_C_(Scaffold_1;HRSCAF_2)::sgC	arabica_cultivated__vs__arabica_introgressed	chr_D_sg_C_(Scaffold_1;HRSCAF_2)	4c	gene-LOC113740035	LOC113740035	LOC113740035	protein_coding	uncharacterized LOC113740035
arabica_cultivated__vs__arabica_introgressed::chr_D_sg_C_(Scaffold_1;HRSCAF_2)::sgC	arabica_cultivated__vs__arabica_introgressed	chr_D_sg_C_(Scaffold_1;HRSCAF_2)	4c	gene-LOC140004722	LOC140004722	LOC140004722	protein_coding	uncharacterized LOC140004722
arabica_cultivated__vs__arabica_introgressed::chr_D_sg_C_(Scaffold_1;HRSCAF_2)::sgC	arabica_cultivated__vs__arabica_introgressed	chr_D_sg_C_(Scaffold_1;HRSCAF_2)	4c	gene-LOC113738397	LOC113738397	LOC113738397	protein_coding	GDSL esterase/lipase At5g22810-like
arabica_cultivated__vs__arabica_introgressed::chr_D_sg_C_(Scaffold_1;HRSCAF_2)::sgC	arabica_cultivated__vs__arabica_introgressed	chr_D_sg_C_(Scaffold_1;HRSCAF_2)	4c	gene-LOC113739084	LOC113739084	LOC113739084	protein_coding	exocyst complex component EXO70E2-like
arabica_cultivated__vs__arabica_introgressed::chr_D_sg_C_(Scaffold_1;HRSCAF_2)::sgC	arabica_cultivated__vs__arabica_introgressed	chr_D_sg_C_(Scaffold_1;HRSCAF_2)	4c	gene-LOC140005322	LOC140005322	LOC140005322	lncRNA	uncharacterized LOC140005322
arabica_cultivated__vs__arabica_introgressed::chr_D_sg_C_(Scaffold_1;HRSCAF_2)::sgC	arabica_cultivated__vs__arabica_introgressed	chr_D_sg_C_(Scaffold_1;HRSCAF_2)	4c	gene-LOC113738598	LOC113738598	LOC113738598	protein_coding	presenilin-like protein At2g29900
arabica_cultivated__vs__arabica_introgressed::chr_D_sg_C_(Scaffold_1;HRSCAF_2)::sgC	arabica_cultivated__vs__arabica_introgressed	chr_D_sg_C_(Scaffold_1;HRSCAF_2)	4c	gene-LOC140004941	LOC140004941	LOC140004941	lncRNA	uncharacterized LOC140004941
arabica_cultivated__vs__arabica_introgressed::chr_D_sg_C_(Scaffold_1;HRSCAF_2)::sgC	arabica_cultivated__vs__arabica_introgressed	chr_D_sg_C_(Scaffold_1;HRSCAF_2)	4c	gene-LOC113739085	LOC113739085	LOC113739085	protein_coding	uncharacterized LOC113739085
arabica_cultivated__vs__arabica_introgressed::chr_D_sg_C_(Scaffold_1;HRSCAF_2)::sgC	arabica_cultivated__vs__arabica_introgressed	chr_D_sg_C_(Scaffold_1;HRSCAF_2)	4c	gene-LOC140004724	LOC140004724	LOC140004724	protein_coding	uncharacterized LOC140004724
arabica_cultivated__vs__arabica_introgressed::chr_D_sg_C_(Scaffold_1;HRSCAF_2)::sgC	arabica_cultivated__vs__arabica_introgressed	chr_D_sg_C_(Scaffold_1;HRSCAF_2)	4c	gene-LOC113722457	LOC113722457	LOC113722457	protein_coding	uncharacterized LOC113722457
arabica_cultivated__vs__arabica_introgressed::chr_D_sg_C_(Scaffold_1;HRSCAF_2)::sgC	arabica_cultivated__vs__arabica_introgressed	chr_D_sg_C_(Scaffold_1;HRSCAF_2)	4c	gene-LOC140005324	LOC140005324	LOC140005324	protein_coding	uncharacterized LOC140005324
arabica_cultivated__vs__arabica_introgressed::chr_D_sg_C_(Scaffold_1;HRSCAF_2)::sgC	arabica_cultivated__vs__arabica_introgressed	chr_D_sg_C_(Scaffold_1;HRSCAF_2)	4c	gene-LOC140005325	LOC140005325	LOC140005325	lncRNA	uncharacterized LOC140005325
arabica_cultivated__vs__arabica_introgressed::chr_D_sg_C_(Scaffold_1;HRSCAF_2)::sgC	arabica_cultivated__vs__arabica_introgressed	chr_D_sg_C_(Scaffold_1;HRSCAF_2)	4c	gene-LOC113740321	LOC113740321	LOC113740321	protein_coding	COBRA-like protein 2
arabica_cultivated__vs__arabica_introgressed::chr_D_sg_C_(Scaffold_1;HRSCAF_2)::sgC	arabica_cultivated__vs__arabica_introgressed	chr_D_sg_C_(Scaffold_1;HRSCAF_2)	4c	gene-LOC113740320	LOC113740320	LOC113740320	protein_coding	COBRA-like protein 4
arabica_cultivated__vs__arabica_introgressed::chr_D_sg_C_(Scaffold_1;HRSCAF_2)::sgC	arabica_cultivated__vs__arabica_introgressed	chr_D_sg_C_(Scaffold_1;HRSCAF_2)	4c	gene-LOC113740322	LOC113740322	LOC113740322	lncRNA	uncharacterized LOC113740322
arabica_cultivated__vs__arabica_introgressed::chr_D_sg_C_(Scaffold_1;HRSCAF_2)::sgC	arabica_cultivated__vs__arabica_introgressed	chr_D_sg_C_(Scaffold_1;HRSCAF_2)	4c	gene-LOC113739033	LOC113739033	LOC113739033	protein_coding	uncharacterized LOC113739033
arabica_cultivated__vs__arabica_introgressed::chr_D_sg_C_(Scaffold_1;HRSCAF_2)::sgC	arabica_cultivated__vs__arabica_introgressed	chr_D_sg_C_(Scaffold_1;HRSCAF_2)	4c	gene-LOC140004725	LOC140004725	LOC140004725	protein_coding	uncharacterized LOC140004725
arabica_cultivated__vs__arabica_introgressed::chr_D_sg_C_(Scaffold_1;HRSCAF_2)::sgC	arabica_cultivated__vs__arabica_introgressed	chr_D_sg_C_(Scaffold_1;HRSCAF_2)	4c	gene-LOC113739427	LOC113739427	LOC113739427	protein_coding	protein COBRA-like
arabica_cultivated__vs__arabica_introgressed::chr_D_sg_C_(Scaffold_1;HRSCAF_2)::sgC	arabica_cultivated__vs__arabica_introgressed	chr_D_sg_C_(Scaffold_1;HRSCAF_2)	4c	gene-LOC113739428	LOC113739428	LOC113739428	lncRNA	uncharacterized LOC113739428
arabica_cultivated__vs__arabica_introgressed::chr_D_sg_C_(Scaffold_1;HRSCAF_2)::sgC	arabica_cultivated__vs__arabica_introgressed	chr_D_sg_C_(Scaffold_1;HRSCAF_2)	4c	gene-LOC140004726	LOC140004726	LOC140004726	protein_coding	secreted RxLR effector protein 161-like
arabica_cultivated__vs__arabica_introgressed::chr_D_sg_C_(Scaffold_1;HRSCAF_2)::sgC	arabica_cultivated__vs__arabica_introgressed	chr_D_sg_C_(Scaffold_1;HRSCAF_2)	4c	gene-LOC113740158	LOC113740158	LOC113740158	protein_coding	cleavage stimulation factor subunit 50
arabica_cultivated__vs__arabica_introgressed::chr_D_sg_C_(Scaffold_1;HRSCAF_2)::sgC	arabica_cultivated__vs__arabica_introgressed	chr_D_sg_C_(Scaffold_1;HRSCAF_2)	4c	gene-LOC113739929	LOC113739929	LOC113739929	protein_coding	small ribosomal subunit protein mL104 (rPPR9)
arabica_cultivated__vs__arabica_introgressed::chr_D_sg_C_(Scaffold_1;HRSCAF_2)::sgC	arabica_cultivated__vs__arabica_introgressed	chr_D_sg_C_(Scaffold_1;HRSCAF_2)	4c	gene-LOC113739930	LOC113739930	LOC113739930	protein_coding	psbP-like protein 1%2C chloroplastic
arabica_cultivated__vs__arabica_introgressed::chr_D_sg_C_(Scaffold_1;HRSCAF_2)::sgC	arabica_cultivated__vs__arabica_introgressed	chr_D_sg_C_(Scaffold_1;HRSCAF_2)	4c	gene-LOC113739401	LOC113739401	LOC113739401	protein_coding	cytochrome P450 78A5
arabica_cultivated__vs__arabica_introgressed::chr_D_sg_C_(Scaffold_1;HRSCAF_2)::sgC	arabica_cultivated__vs__arabica_introgressed	chr_D_sg_C_(Scaffold_1;HRSCAF_2)	4c	gene-LOC113739030	LOC113739030	LOC113739030	protein_coding	uncharacterized LOC113739030
arabica_cultivated__vs__arabica_introgressed::chr_D_sg_C_(Scaffold_1;HRSCAF_2)::sgC	arabica_cultivated__vs__arabica_introgressed	chr_D_sg_C_(Scaffold_1;HRSCAF_2)	4c	gene-LOC113739031	LOC113739031	LOC113739031	protein_coding	uncharacterized LOC113739031
arabica_cultivated__vs__arabica_introgressed::chr_D_sg_C_(Scaffold_1;HRSCAF_2)::sgC	arabica_cultivated__vs__arabica_introgressed	chr_D_sg_C_(Scaffold_1;HRSCAF_2)	4c	gene-LOC140005326	LOC140005326	LOC140005326	lncRNA	uncharacterized LOC140005326
arabica_cultivated__vs__arabica_introgressed::chr_D_sg_C_(Scaffold_1;HRSCAF_2)::sgC	arabica_cultivated__vs__arabica_introgressed	chr_D_sg_C_(Scaffold_1;HRSCAF_2)	4c	gene-LOC140004727	LOC140004727	LOC140004727	protein_coding	uncharacterized LOC140004727
arabica_cultivated__vs__arabica_introgressed::chr_D_sg_C_(Scaffold_1;HRSCAF_2)::sgC	arabica_cultivated__vs__arabica_introgressed	chr_D_sg_C_(Scaffold_1;HRSCAF_2)	4c	gene-LOC140004728	LOC140004728	LOC140004728	protein_coding	uncharacterized LOC140004728
arabica_cultivated__vs__arabica_introgressed::chr_D_sg_C_(Scaffold_1;HRSCAF_2)::sgC	arabica_cultivated__vs__arabica_introgressed	chr_D_sg_C_(Scaffold_1;HRSCAF_2)	4c	gene-LOC140004729	LOC140004729	LOC140004729	protein_coding	uncharacterized LOC140004729
arabica_cultivated__vs__arabica_introgressed::chr_D_sg_C_(Scaffold_1;HRSCAF_2)::sgC	arabica_cultivated__vs__arabica_introgressed	chr_D_sg_C_(Scaffold_1;HRSCAF_2)	4c	gene-LOC113743833	LOC113743833	LOC113743833	snoRNA	small nucleolar RNA R71
arabica_cultivated__vs__arabica_introgressed::chr_D_sg_C_(Scaffold_1;HRSCAF_2)::sgC	arabica_cultivated__vs__arabica_introgressed	chr_D_sg_C_(Scaffold_1;HRSCAF_2)	4c	gene-LOC140004730	LOC140004730	LOC140004730	protein_coding	uncharacterized LOC140004730
arabica_cultivated__vs__arabica_introgressed::chr_D_sg_C_(Scaffold_1;HRSCAF_2)::sgC	arabica_cultivated__vs__arabica_introgressed	chr_D_sg_C_(Scaffold_1;HRSCAF_2)	4c	gene-LOC140004731	LOC140004731	LOC140004731	protein_coding	uncharacterized LOC140004731
arabica_cultivated__vs__arabica_introgressed::chr_D_sg_C_(Scaffold_1;HRSCAF_2)::sgC	arabica_cultivated__vs__arabica_introgressed	chr_D_sg_C_(Scaffold_1;HRSCAF_2)	4c	gene-LOC113739088	LOC113739088	LOC113739088	protein_coding	blue-light photoreceptor PHR2-like
arabica_cultivated__vs__arabica_introgressed::chr_D_sg_C_(Scaffold_1;HRSCAF_2)::sgC	arabica_cultivated__vs__arabica_introgressed	chr_D_sg_C_(Scaffold_1;HRSCAF_2)	4c	gene-LOC140004732	LOC140004732	LOC140004732	protein_coding	uncharacterized LOC140004732
arabica_cultivated__vs__arabica_introgressed::chr_D_sg_C_(Scaffold_1;HRSCAF_2)::sgC	arabica_cultivated__vs__arabica_introgressed	chr_D_sg_C_(Scaffold_1;HRSCAF_2)	4c	gene-LOC113738630	LOC113738630	LOC113738630	protein_coding	RHOMBOID-like protein 12%2C mitochondrial
arabica_cultivated__vs__arabica_introgressed::chr_D_sg_C_(Scaffold_1;HRSCAF_2)::sgC	arabica_cultivated__vs__arabica_introgressed	chr_D_sg_C_(Scaffold_1;HRSCAF_2)	4c	gene-LOC140004733	LOC140004733	LOC140004733	protein_coding	uncharacterized LOC140004733
arabica_cultivated__vs__arabica_introgressed::chr_D_sg_C_(Scaffold_1;HRSCAF_2)::sgC	arabica_cultivated__vs__arabica_introgressed	chr_D_sg_C_(Scaffold_1;HRSCAF_2)	4c	gene-LOC140005327	LOC140005327	LOC140005327	lncRNA	uncharacterized LOC140005327
arabica_cultivated__vs__arabica_introgressed::chr_D_sg_C_(Scaffold_1;HRSCAF_2)::sgC	arabica_cultivated__vs__arabica_introgressed	chr_D_sg_C_(Scaffold_1;HRSCAF_2)	4c	gene-LOC113739941	LOC113739941	LOC113739941	protein_coding	protein GLUTELIN PRECURSOR ACCUMULATION 3-like
arabica_cultivated__vs__arabica_introgressed::chr_D_sg_C_(Scaffold_1;HRSCAF_2)::sgC	arabica_cultivated__vs__arabica_introgressed	chr_D_sg_C_(Scaffold_1;HRSCAF_2)	4c	gene-LOC113739940	LOC113739940	LOC113739940	protein_coding	protein SPIRAL1-like 2
arabica_cultivated__vs__arabica_introgressed::chr_D_sg_C_(Scaffold_1;HRSCAF_2)::sgC	arabica_cultivated__vs__arabica_introgressed	chr_D_sg_C_(Scaffold_1;HRSCAF_2)	4c	gene-LOC113738464	LOC113738464	LOC113738464	lncRNA	uncharacterized LOC113738464
arabica_cultivated__vs__arabica_introgressed::chr_D_sg_C_(Scaffold_1;HRSCAF_2)::sgC	arabica_cultivated__vs__arabica_introgressed	chr_D_sg_C_(Scaffold_1;HRSCAF_2)	4c	gene-LOC113739039	LOC113739039	LOC113739039	protein_coding	zinc finger protein ENHYDROUS-like
arabica_cultivated__vs__arabica_introgressed::chr_D_sg_C_(Scaffold_1;HRSCAF_2)::sgC	arabica_cultivated__vs__arabica_introgressed	chr_D_sg_C_(Scaffold_1;HRSCAF_2)	4c	gene-LOC140005328	LOC140005328	LOC140005328	lncRNA	uncharacterized LOC140005328
arabica_cultivated__vs__arabica_introgressed::chr_D_sg_C_(Scaffold_1;HRSCAF_2)::sgC	arabica_cultivated__vs__arabica_introgressed	chr_D_sg_C_(Scaffold_1;HRSCAF_2)	4c	gene-LOC140004942	LOC140004942	LOC140004942	lncRNA	uncharacterized LOC140004942
arabica_cultivated__vs__arabica_introgressed::chr_D_sg_C_(Scaffold_1;HRSCAF_2)::sgC	arabica_cultivated__vs__arabica_introgressed	chr_D_sg_C_(Scaffold_1;HRSCAF_2)	4c	gene-LOC113739037	LOC113739037	LOC113739037	protein_coding	uncharacterized LOC113739037
arabica_cultivated__vs__arabica_introgressed::chr_D_sg_C_(Scaffold_1;HRSCAF_2)::sgC	arabica_cultivated__vs__arabica_introgressed	chr_D_sg_C_(Scaffold_1;HRSCAF_2)	4c	gene-LOC140004735	LOC140004735	LOC140004735	protein_coding	uncharacterized LOC140004735
arabica_cultivated__vs__arabica_introgressed::chr_D_sg_C_(Scaffold_1;HRSCAF_2)::sgC	arabica_cultivated__vs__arabica_introgressed	chr_D_sg_C_(Scaffold_1;HRSCAF_2)	4c	gene-LOC140004736	LOC140004736	LOC140004736	protein_coding	uncharacterized LOC140004736
arabica_cultivated__vs__arabica_introgressed::chr_D_sg_C_(Scaffold_1;HRSCAF_2)::sgC	arabica_cultivated__vs__arabica_introgressed	chr_D_sg_C_(Scaffold_1;HRSCAF_2)	4c	gene-LOC140004943	LOC140004943	LOC140004943	lncRNA	uncharacterized LOC140004943
arabica_cultivated__vs__arabica_introgressed::chr_D_sg_C_(Scaffold_1;HRSCAF_2)::sgC	arabica_cultivated__vs__arabica_introgressed	chr_D_sg_C_(Scaffold_1;HRSCAF_2)	4c	gene-LOC140004737	LOC140004737	LOC140004737	protein_coding	uncharacterized LOC140004737
arabica_cultivated__vs__arabica_introgressed::chr_D_sg_C_(Scaffold_1;HRSCAF_2)::sgC	arabica_cultivated__vs__arabica_introgressed	chr_D_sg_C_(Scaffold_1;HRSCAF_2)	4c	gene-LOC140004944	LOC140004944	LOC140004944	lncRNA	uncharacterized LOC140004944
arabica_cultivated__vs__arabica_introgressed::chr_D_sg_C_(Scaffold_1;HRSCAF_2)::sgC	arabica_cultivated__vs__arabica_introgressed	chr_D_sg_C_(Scaffold_1;HRSCAF_2)	4c	gene-LOC140004738	LOC140004738	LOC140004738	protein_coding	small ribosomal subunit protein eS4-like
arabica_cultivated__vs__arabica_introgressed::chr_D_sg_C_(Scaffold_1;HRSCAF_2)::sgC	arabica_cultivated__vs__arabica_introgressed	chr_D_sg_C_(Scaffold_1;HRSCAF_2)	4c	gene-LOC113689231	LOC113689231	LOC113689231	protein_coding	small ribosomal subunit protein eS4-like
arabica_cultivated__vs__arabica_introgressed::chr_D_sg_C_(Scaffold_1;HRSCAF_2)::sgC	arabica_cultivated__vs__arabica_introgressed	chr_D_sg_C_(Scaffold_1;HRSCAF_2)	4c	gene-LOC140004945	LOC140004945	LOC140004945	lncRNA	uncharacterized LOC140004945
arabica_cultivated__vs__arabica_introgressed::chr_D_sg_C_(Scaffold_1;HRSCAF_2)::sgC	arabica_cultivated__vs__arabica_introgressed	chr_D_sg_C_(Scaffold_1;HRSCAF_2)	4c	gene-LOC140004946	LOC140004946	LOC140004946	lncRNA	uncharacterized LOC140004946
arabica_cultivated__vs__arabica_introgressed::chr_D_sg_C_(Scaffold_1;HRSCAF_2)::sgC	arabica_cultivated__vs__arabica_introgressed	chr_D_sg_C_(Scaffold_1;HRSCAF_2)	4c	gene-LOC140004947	LOC140004947	LOC140004947	lncRNA	uncharacterized LOC140004947
arabica_cultivated__vs__arabica_introgressed::chr_D_sg_C_(Scaffold_1;HRSCAF_2)::sgC	arabica_cultivated__vs__arabica_introgressed	chr_D_sg_C_(Scaffold_1;HRSCAF_2)	4c	gene-LOC140004948	LOC140004948	LOC140004948	lncRNA	uncharacterized LOC140004948
arabica_cultivated__vs__arabica_introgressed::chr_D_sg_C_(Scaffold_1;HRSCAF_2)::sgC	arabica_cultivated__vs__arabica_introgressed	chr_D_sg_C_(Scaffold_1;HRSCAF_2)	4c	gene-LOC113701448	LOC113701448	LOC113701448	protein_coding	agamous-like MADS-box protein AP1
arabica_cultivated__vs__arabica_introgressed::chr_D_sg_C_(Scaffold_1;HRSCAF_2)::sgC	arabica_cultivated__vs__arabica_introgressed	chr_D_sg_C_(Scaffold_1;HRSCAF_2)	4c	gene-LOC113700724	LOC113700724	LOC113700724	protein_coding	uncharacterized LOC113700724
arabica_cultivated__vs__arabica_introgressed::chr_D_sg_C_(Scaffold_1;HRSCAF_2)::sgC	arabica_cultivated__vs__arabica_introgressed	chr_D_sg_C_(Scaffold_1;HRSCAF_2)	4c	gene-LOC140005329	LOC140005329	LOC140005329	lncRNA	uncharacterized LOC140005329
arabica_cultivated__vs__arabica_introgressed::chr_D_sg_C_(Scaffold_1;HRSCAF_2)::sgC	arabica_cultivated__vs__arabica_introgressed	chr_D_sg_C_(Scaffold_1;HRSCAF_2)	4c	gene-LOC140005330	LOC140005330	LOC140005330	lncRNA	uncharacterized LOC140005330
arabica_cultivated__vs__arabica_introgressed::chr_D_sg_C_(Scaffold_1;HRSCAF_2)::sgC	arabica_cultivated__vs__arabica_introgressed	chr_D_sg_C_(Scaffold_1;HRSCAF_2)	4c	gene-LOC140005331	LOC140005331	LOC140005331	lncRNA	uncharacterized LOC140005331
arabica_cultivated__vs__arabica_introgressed::chr_D_sg_C_(Scaffold_1;HRSCAF_2)::sgC	arabica_cultivated__vs__arabica_introgressed	chr_D_sg_C_(Scaffold_1;HRSCAF_2)	4c	gene-LOC140004739	LOC140004739	LOC140004739	protein_coding	uncharacterized LOC140004739
arabica_cultivated__vs__arabica_introgressed::chr_D_sg_C_(Scaffold_1;HRSCAF_2)::sgC	arabica_cultivated__vs__arabica_introgressed	chr_D_sg_C_(Scaffold_1;HRSCAF_2)	4c	gene-LOC113739135	LOC113739135	LOC113739135	protein_coding	uncharacterized LOC113739135
arabica_cultivated__vs__arabica_introgressed::chr_D_sg_C_(Scaffold_1;HRSCAF_2)::sgC	arabica_cultivated__vs__arabica_introgressed	chr_D_sg_C_(Scaffold_1;HRSCAF_2)	4c	gene-LOC140004949	LOC140004949	LOC140004949	lncRNA	uncharacterized LOC140004949
arabica_cultivated__vs__arabica_introgressed::chr_D_sg_C_(Scaffold_1;HRSCAF_2)::sgC	arabica_cultivated__vs__arabica_introgressed	chr_D_sg_C_(Scaffold_1;HRSCAF_2)	4c	gene-LOC140005332	LOC140005332	LOC140005332	lncRNA	uncharacterized LOC140005332
arabica_cultivated__vs__arabica_introgressed::chr_D_sg_C_(Scaffold_1;HRSCAF_2)::sgC	arabica_cultivated__vs__arabica_introgressed	chr_D_sg_C_(Scaffold_1;HRSCAF_2)	4c	gene-LOC140004950	LOC140004950	LOC140004950	lncRNA	uncharacterized LOC140004950
arabica_cultivated__vs__arabica_introgressed::chr_D_sg_C_(Scaffold_1;HRSCAF_2)::sgC	arabica_cultivated__vs__arabica_introgressed	chr_D_sg_C_(Scaffold_1;HRSCAF_2)	4c	gene-LOC140004951	LOC140004951	LOC140004951	lncRNA	uncharacterized LOC140004951
arabica_cultivated__vs__arabica_introgressed::chr_D_sg_C_(Scaffold_1;HRSCAF_2)::sgC	arabica_cultivated__vs__arabica_introgressed	chr_D_sg_C_(Scaffold_1;HRSCAF_2)	4c	gene-LOC140004952	LOC140004952	LOC140004952	lncRNA	uncharacterized LOC140004952
arabica_cultivated__vs__arabica_introgressed::chr_D_sg_C_(Scaffold_1;HRSCAF_2)::sgC	arabica_cultivated__vs__arabica_introgressed	chr_D_sg_C_(Scaffold_1;HRSCAF_2)	4c	gene-LOC140004953	LOC140004953	LOC140004953	lncRNA	uncharacterized LOC140004953
arabica_cultivated__vs__arabica_introgressed::chr_D_sg_C_(Scaffold_1;HRSCAF_2)::sgC	arabica_cultivated__vs__arabica_introgressed	chr_D_sg_C_(Scaffold_1;HRSCAF_2)	4c	gene-LOC140004740	LOC140004740	LOC140004740	protein_coding	uncharacterized LOC140004740
arabica_cultivated__vs__arabica_introgressed::chr_D_sg_C_(Scaffold_1;HRSCAF_2)::sgC	arabica_cultivated__vs__arabica_introgressed	chr_D_sg_C_(Scaffold_1;HRSCAF_2)	4c	gene-LOC113740486	LOC113740486	LOC113740486	snoRNA	small nucleolar RNA R71
arabica_cultivated__vs__arabica_introgressed::chr_D_sg_C_(Scaffold_1;HRSCAF_2)::sgC	arabica_cultivated__vs__arabica_introgressed	chr_D_sg_C_(Scaffold_1;HRSCAF_2)	4c	gene-LOC140004741	LOC140004741	LOC140004741	protein_coding	uncharacterized LOC140004741
arabica_cultivated__vs__arabica_introgressed::chr_D_sg_C_(Scaffold_1;HRSCAF_2)::sgC	arabica_cultivated__vs__arabica_introgressed	chr_D_sg_C_(Scaffold_1;HRSCAF_2)	4c	gene-LOC113740008	LOC113740008	LOC113740008	protein_coding	phytochrome-associated serine/threonine-protein phosphatase	kinase_signaling
arabica_cultivated__vs__arabica_introgressed::chr_D_sg_C_(Scaffold_1;HRSCAF_2)::sgC	arabica_cultivated__vs__arabica_introgressed	chr_D_sg_C_(Scaffold_1;HRSCAF_2)	4c	gene-LOC140004954	LOC140004954	LOC140004954	lncRNA	uncharacterized LOC140004954
arabica_cultivated__vs__arabica_introgressed::chr_D_sg_C_(Scaffold_1;HRSCAF_2)::sgC	arabica_cultivated__vs__arabica_introgressed	chr_D_sg_C_(Scaffold_1;HRSCAF_2)	4c	gene-LOC113740009	LOC113740009	LOC113740009	protein_coding	DEAD-box ATP-dependent RNA helicase 35-like
arabica_cultivated__vs__arabica_introgressed::chr_D_sg_C_(Scaffold_1;HRSCAF_2)::sgC	arabica_cultivated__vs__arabica_introgressed	chr_D_sg_C_(Scaffold_1;HRSCAF_2)	4c	gene-LOC113721858	LOC113721858	LOC113721858	protein_coding	uncharacterized LOC113721858
arabica_cultivated__vs__arabica_introgressed::chr_D_sg_C_(Scaffold_1;HRSCAF_2)::sgC	arabica_cultivated__vs__arabica_introgressed	chr_D_sg_C_(Scaffold_1;HRSCAF_2)	4c	gene-LOC140004955	LOC140004955	LOC140004955	lncRNA	uncharacterized LOC140004955
arabica_cultivated__vs__arabica_introgressed::chr_D_sg_C_(Scaffold_1;HRSCAF_2)::sgC	arabica_cultivated__vs__arabica_introgressed	chr_D_sg_C_(Scaffold_1;HRSCAF_2)	4c	gene-LOC140004956	LOC140004956	LOC140004956	lncRNA	uncharacterized LOC140004956
arabica_cultivated__vs__arabica_introgressed::chr_D_sg_C_(Scaffold_1;HRSCAF_2)::sgC	arabica_cultivated__vs__arabica_introgressed	chr_D_sg_C_(Scaffold_1;HRSCAF_2)	4c	gene-LOC140004957	LOC140004957	LOC140004957	lncRNA	uncharacterized LOC140004957
arabica_cultivated__vs__arabica_introgressed::chr_D_sg_C_(Scaffold_1;HRSCAF_2)::sgC	arabica_cultivated__vs__arabica_introgressed	chr_D_sg_C_(Scaffold_1;HRSCAF_2)	4c	gene-LOC140004958	LOC140004958	LOC140004958	lncRNA	uncharacterized LOC140004958
arabica_cultivated__vs__arabica_introgressed::chr_D_sg_C_(Scaffold_1;HRSCAF_2)::sgC	arabica_cultivated__vs__arabica_introgressed	chr_D_sg_C_(Scaffold_1;HRSCAF_2)	4c	gene-LOC140004742	LOC140004742	LOC140004742	protein_coding	uncharacterized LOC140004742
arabica_cultivated__vs__arabica_introgressed::chr_D_sg_C_(Scaffold_1;HRSCAF_2)::sgC	arabica_cultivated__vs__arabica_introgressed	chr_D_sg_C_(Scaffold_1;HRSCAF_2)	4c	gene-LOC140004743	LOC140004743	LOC140004743	protein_coding	uncharacterized LOC140004743
arabica_cultivated__vs__arabica_introgressed::chr_D_sg_C_(Scaffold_1;HRSCAF_2)::sgC	arabica_cultivated__vs__arabica_introgressed	chr_D_sg_C_(Scaffold_1;HRSCAF_2)	4c	gene-LOC140004744	LOC140004744	LOC140004744	protein_coding	uncharacterized LOC140004744
arabica_cultivated__vs__arabica_introgressed::chr_D_sg_C_(Scaffold_1;HRSCAF_2)::sgC	arabica_cultivated__vs__arabica_introgressed	chr_D_sg_C_(Scaffold_1;HRSCAF_2)	4c	gene-LOC140004745	LOC140004745	LOC140004745	protein_coding	uncharacterized LOC140004745
arabica_cultivated__vs__arabica_introgressed::chr_D_sg_C_(Scaffold_1;HRSCAF_2)::sgC	arabica_cultivated__vs__arabica_introgressed	chr_D_sg_C_(Scaffold_1;HRSCAF_2)	4c	gene-LOC140004959	LOC140004959	LOC140004959	lncRNA	uncharacterized LOC140004959
arabica_cultivated__vs__arabica_introgressed::chr_D_sg_C_(Scaffold_1;HRSCAF_2)::sgC	arabica_cultivated__vs__arabica_introgressed	chr_D_sg_C_(Scaffold_1;HRSCAF_2)	4c	gene-LOC140004746	LOC140004746	LOC140004746	protein_coding	uncharacterized LOC140004746
arabica_cultivated__vs__arabica_introgressed::chr_D_sg_C_(Scaffold_1;HRSCAF_2)::sgC	arabica_cultivated__vs__arabica_introgressed	chr_D_sg_C_(Scaffold_1;HRSCAF_2)	4c	gene-LOC140004960	LOC140004960	LOC140004960	lncRNA	uncharacterized LOC140004960
arabica_cultivated__vs__arabica_introgressed::chr_D_sg_C_(Scaffold_1;HRSCAF_2)::sgC	arabica_cultivated__vs__arabica_introgressed	chr_D_sg_C_(Scaffold_1;HRSCAF_2)	4c	gene-LOC140004747	LOC140004747	LOC140004747	protein_coding	uncharacterized LOC140004747
arabica_cultivated__vs__arabica_introgressed::chr_D_sg_C_(Scaffold_1;HRSCAF_2)::sgC	arabica_cultivated__vs__arabica_introgressed	chr_D_sg_C_(Scaffold_1;HRSCAF_2)	4c	gene-LOC140004748	LOC140004748	LOC140004748	protein_coding	uncharacterized LOC140004748
arabica_cultivated__vs__arabica_introgressed::chr_D_sg_C_(Scaffold_1;HRSCAF_2)::sgC	arabica_cultivated__vs__arabica_introgressed	chr_D_sg_C_(Scaffold_1;HRSCAF_2)	4c	gene-LOC140004749	LOC140004749	LOC140004749	protein_coding	uncharacterized LOC140004749
arabica_cultivated__vs__arabica_introgressed::chr_D_sg_C_(Scaffold_1;HRSCAF_2)::sgC	arabica_cultivated__vs__arabica_introgressed	chr_D_sg_C_(Scaffold_1;HRSCAF_2)	4c	gene-LOC113738609	LOC113738609	LOC113738609	protein_coding	uncharacterized LOC113738609
arabica_cultivated__vs__arabica_introgressed::chr_D_sg_C_(Scaffold_1;HRSCAF_2)::sgC	arabica_cultivated__vs__arabica_introgressed	chr_D_sg_C_(Scaffold_1;HRSCAF_2)	4c	gene-LOC140004750	LOC140004750	LOC140004750	protein_coding	uncharacterized LOC140004750
arabica_cultivated__vs__arabica_introgressed::chr_D_sg_C_(Scaffold_1;HRSCAF_2)::sgC	arabica_cultivated__vs__arabica_introgressed	chr_D_sg_C_(Scaffold_1;HRSCAF_2)	4c	gene-LOC113738594	LOC113738594	LOC113738594	protein_coding	UPF0426 protein At1g28150%2C chloroplastic-like
arabica_cultivated__vs__arabica_introgressed::chr_D_sg_C_(Scaffold_1;HRSCAF_2)::sgC	arabica_cultivated__vs__arabica_introgressed	chr_D_sg_C_(Scaffold_1;HRSCAF_2)	4c	gene-LOC113739123	LOC113739123	LOC113739123	protein_coding	amino acid transporter AVT6C-like	transport_membrane
arabica_cultivated__vs__arabica_introgressed::chr_D_sg_C_(Scaffold_1;HRSCAF_2)::sgC	arabica_cultivated__vs__arabica_introgressed	chr_D_sg_C_(Scaffold_1;HRSCAF_2)	4c	gene-LOC140004751	LOC140004751	LOC140004751	protein_coding	uncharacterized LOC140004751
arabica_cultivated__vs__arabica_introgressed::chr_D_sg_C_(Scaffold_1;HRSCAF_2)::sgC	arabica_cultivated__vs__arabica_introgressed	chr_D_sg_C_(Scaffold_1;HRSCAF_2)	4c	gene-LOC113739124	LOC113739124	LOC113739124	protein_coding	uncharacterized LOC113739124
arabica_cultivated__vs__arabica_introgressed::chr_D_sg_C_(Scaffold_1;HRSCAF_2)::sgC	arabica_cultivated__vs__arabica_introgressed	chr_D_sg_C_(Scaffold_1;HRSCAF_2)	4c	gene-LOC140004752	LOC140004752	LOC140004752	protein_coding	uncharacterized LOC140004752
arabica_cultivated__vs__arabica_introgressed::chr_D_sg_C_(Scaffold_1;HRSCAF_2)::sgC	arabica_cultivated__vs__arabica_introgressed	chr_D_sg_C_(Scaffold_1;HRSCAF_2)	4c	gene-LOC113738403	LOC113738403	LOC113738403	protein_coding	uncharacterized LOC113738403
arabica_cultivated__vs__arabica_introgressed::chr_D_sg_C_(Scaffold_1;HRSCAF_2)::sgC	arabica_cultivated__vs__arabica_introgressed	chr_D_sg_C_(Scaffold_1;HRSCAF_2)	4c	gene-LOC113739125	LOC113739125	LOC113739125	protein_coding	uncharacterized LOC113739125
arabica_cultivated__vs__arabica_introgressed::chr_D_sg_C_(Scaffold_1;HRSCAF_2)::sgC	arabica_cultivated__vs__arabica_introgressed	chr_D_sg_C_(Scaffold_1;HRSCAF_2)	4c	gene-LOC113740021	LOC113740021	LOC113740021	protein_coding	tryptophan--tRNA ligase%2C cytoplasmic
arabica_cultivated__vs__arabica_introgressed::chr_D_sg_C_(Scaffold_1;HRSCAF_2)::sgC	arabica_cultivated__vs__arabica_introgressed	chr_D_sg_C_(Scaffold_1;HRSCAF_2)	4c	gene-LOC140004961	LOC140004961	LOC140004961	lncRNA	uncharacterized LOC140004961
arabica_cultivated__vs__arabica_introgressed::chr_D_sg_C_(Scaffold_1;HRSCAF_2)::sgC	arabica_cultivated__vs__arabica_introgressed	chr_D_sg_C_(Scaffold_1;HRSCAF_2)	4c	gene-LOC113738725	LOC113738725	LOC113738725	lncRNA	uncharacterized LOC113738725
arabica_cultivated__vs__arabica_introgressed::chr_D_sg_C_(Scaffold_1;HRSCAF_2)::sgC	arabica_cultivated__vs__arabica_introgressed	chr_D_sg_C_(Scaffold_1;HRSCAF_2)	4c	gene-LOC113740023	LOC113740023	LOC113740023	protein_coding	uncharacterized LOC113740023
arabica_cultivated__vs__arabica_introgressed::chr_D_sg_C_(Scaffold_1;HRSCAF_2)::sgC	arabica_cultivated__vs__arabica_introgressed	chr_D_sg_C_(Scaffold_1;HRSCAF_2)	4c	gene-LOC113738592	LOC113738592	LOC113738592	protein_coding	uncharacterized LOC113738592
arabica_cultivated__vs__arabica_introgressed::chr_D_sg_C_(Scaffold_1;HRSCAF_2)::sgC	arabica_cultivated__vs__arabica_introgressed	chr_D_sg_C_(Scaffold_1;HRSCAF_2)	4c	gene-LOC140004754	LOC140004754	LOC140004754	protein_coding	uncharacterized LOC140004754
arabica_cultivated__vs__arabica_introgressed::chr_D_sg_C_(Scaffold_1;HRSCAF_2)::sgC	arabica_cultivated__vs__arabica_introgressed	chr_D_sg_C_(Scaffold_1;HRSCAF_2)	4c	gene-LOC113693529	LOC113693529	LOC113693529	protein_coding	uncharacterized LOC113693529
arabica_cultivated__vs__arabica_introgressed::chr_D_sg_C_(Scaffold_1;HRSCAF_2)::sgC	arabica_cultivated__vs__arabica_introgressed	chr_D_sg_C_(Scaffold_1;HRSCAF_2)	4c	gene-LOC113693528	LOC113693528	LOC113693528	protein_coding	uncharacterized LOC113693528
arabica_cultivated__vs__arabica_introgressed::chr_D_sg_C_(Scaffold_1;HRSCAF_2)::sgC	arabica_cultivated__vs__arabica_introgressed	chr_D_sg_C_(Scaffold_1;HRSCAF_2)	4c	gene-LOC140004755	LOC140004755	LOC140004755	protein_coding	uncharacterized LOC140004755
arabica_cultivated__vs__arabica_introgressed::chr_D_sg_C_(Scaffold_1;HRSCAF_2)::sgC	arabica_cultivated__vs__arabica_introgressed	chr_D_sg_C_(Scaffold_1;HRSCAF_2)	4c	gene-LOC113740248	LOC113740248	LOC113740248	protein_coding	uncharacterized membrane protein At4g09580-like	transport_membrane
arabica_cultivated__vs__arabica_introgressed::chr_D_sg_C_(Scaffold_1;HRSCAF_2)::sgC	arabica_cultivated__vs__arabica_introgressed	chr_D_sg_C_(Scaffold_1;HRSCAF_2)	4c	gene-LOC140005334	LOC140005334	LOC140005334	lncRNA	uncharacterized LOC140005334
arabica_cultivated__vs__arabica_introgressed::chr_D_sg_C_(Scaffold_1;HRSCAF_2)::sgC	arabica_cultivated__vs__arabica_introgressed	chr_D_sg_C_(Scaffold_1;HRSCAF_2)	4c	gene-LOC140004756	LOC140004756	LOC140004756	protein_coding	uncharacterized LOC140004756
arabica_cultivated__vs__arabica_introgressed::chr_D_sg_C_(Scaffold_1;HRSCAF_2)::sgC	arabica_cultivated__vs__arabica_introgressed	chr_D_sg_C_(Scaffold_1;HRSCAF_2)	4c	gene-LOC113738505	LOC113738505	LOC113738505	lncRNA	uncharacterized LOC113738505
arabica_cultivated__vs__arabica_introgressed::chr_D_sg_C_(Scaffold_1;HRSCAF_2)::sgC	arabica_cultivated__vs__arabica_introgressed	chr_D_sg_C_(Scaffold_1;HRSCAF_2)	4c	gene-LOC113739087	LOC113739087	LOC113739087	protein_coding	uncharacterized LOC113739087
arabica_cultivated__vs__arabica_introgressed::chr_D_sg_C_(Scaffold_1;HRSCAF_2)::sgC	arabica_cultivated__vs__arabica_introgressed	chr_D_sg_C_(Scaffold_1;HRSCAF_2)	4c	gene-LOC140004757	LOC140004757	LOC140004757	protein_coding	uncharacterized LOC140004757
arabica_cultivated__vs__arabica_introgressed::chr_D_sg_C_(Scaffold_1;HRSCAF_2)::sgC	arabica_cultivated__vs__arabica_introgressed	chr_D_sg_C_(Scaffold_1;HRSCAF_2)	4c	gene-LOC113723443	LOC113723443	LOC113723443	protein_coding	transcription factor TCP5	transcriptional_regulation
arabica_cultivated__vs__arabica_introgressed::chr_D_sg_C_(Scaffold_1;HRSCAF_2)::sgC	arabica_cultivated__vs__arabica_introgressed	chr_D_sg_C_(Scaffold_1;HRSCAF_2)	4c	gene-LOC140005335	LOC140005335	LOC140005335	lncRNA	uncharacterized LOC140005335
arabica_cultivated__vs__arabica_introgressed::chr_D_sg_C_(Scaffold_1;HRSCAF_2)::sgC	arabica_cultivated__vs__arabica_introgressed	chr_D_sg_C_(Scaffold_1;HRSCAF_2)	4c	gene-LOC140004758	LOC140004758	LOC140004758	protein_coding	uncharacterized LOC140004758
arabica_cultivated__vs__arabica_introgressed::chr_D_sg_C_(Scaffold_1;HRSCAF_2)::sgC	arabica_cultivated__vs__arabica_introgressed	chr_D_sg_C_(Scaffold_1;HRSCAF_2)	4c	gene-LOC140004962	LOC140004962	LOC140004962	lncRNA	uncharacterized LOC140004962
arabica_cultivated__vs__arabica_introgressed::chr_D_sg_C_(Scaffold_1;HRSCAF_2)::sgC	arabica_cultivated__vs__arabica_introgressed	chr_D_sg_C_(Scaffold_1;HRSCAF_2)	4c	gene-LOC113741281	LOC113741281	LOC113741281	protein_coding	alcohol dehydrogenase-like 6
arabica_cultivated__vs__arabica_introgressed::chr_D_sg_C_(Scaffold_1;HRSCAF_2)::sgC	arabica_cultivated__vs__arabica_introgressed	chr_D_sg_C_(Scaffold_1;HRSCAF_2)	4c	gene-LOC140005336	LOC140005336	LOC140005336	lncRNA	uncharacterized LOC140005336
arabica_cultivated__vs__arabica_introgressed::chr_D_sg_C_(Scaffold_1;HRSCAF_2)::sgC	arabica_cultivated__vs__arabica_introgressed	chr_D_sg_C_(Scaffold_1;HRSCAF_2)	4c	gene-LOC113742121	LOC113742121	LOC113742121	protein_coding	uncharacterized LOC113742121
arabica_cultivated__vs__arabica_introgressed::chr_D_sg_C_(Scaffold_1;HRSCAF_2)::sgC	arabica_cultivated__vs__arabica_introgressed	chr_D_sg_C_(Scaffold_1;HRSCAF_2)	4c	gene-LOC140004759	LOC140004759	LOC140004759	protein_coding	uncharacterized LOC140004759
arabica_cultivated__vs__arabica_introgressed::chr_D_sg_C_(Scaffold_1;HRSCAF_2)::sgC	arabica_cultivated__vs__arabica_introgressed	chr_D_sg_C_(Scaffold_1;HRSCAF_2)	4c	gene-LOC140004760	LOC140004760	LOC140004760	protein_coding	uncharacterized LOC140004760
arabica_cultivated__vs__arabica_introgressed::chr_D_sg_C_(Scaffold_1;HRSCAF_2)::sgC	arabica_cultivated__vs__arabica_introgressed	chr_D_sg_C_(Scaffold_1;HRSCAF_2)	4c	gene-LOC140005337	LOC140005337	LOC140005337	lncRNA	uncharacterized LOC140005337
arabica_cultivated__vs__arabica_introgressed::chr_D_sg_C_(Scaffold_1;HRSCAF_2)::sgC	arabica_cultivated__vs__arabica_introgressed	chr_D_sg_C_(Scaffold_1;HRSCAF_2)	4c	gene-LOC113727323	LOC113727323	LOC113727323	protein_coding	NF-X1-type zinc finger protein NFXL1
arabica_cultivated__vs__arabica_introgressed::chr_D_sg_C_(Scaffold_1;HRSCAF_2)::sgC	arabica_cultivated__vs__arabica_introgressed	chr_D_sg_C_(Scaffold_1;HRSCAF_2)	4c	gene-LOC113724367	LOC113724367	LOC113724367	lncRNA	uncharacterized LOC113724367
arabica_cultivated__vs__arabica_introgressed::chr_D_sg_C_(Scaffold_1;HRSCAF_2)::sgC	arabica_cultivated__vs__arabica_introgressed	chr_D_sg_C_(Scaffold_1;HRSCAF_2)	4c	gene-LOC113727324	LOC113727324	LOC113727324	lncRNA	uncharacterized LOC113727324
arabica_cultivated__vs__arabica_introgressed::chr_D_sg_C_(Scaffold_1;HRSCAF_2)::sgC	arabica_cultivated__vs__arabica_introgressed	chr_D_sg_C_(Scaffold_1;HRSCAF_2)	4c	gene-LOC113724368	LOC113724368	LOC113724368	lncRNA	uncharacterized LOC113724368
arabica_cultivated__vs__arabica_introgressed::chr_D_sg_C_(Scaffold_1;HRSCAF_2)::sgC	arabica_cultivated__vs__arabica_introgressed	chr_D_sg_C_(Scaffold_1;HRSCAF_2)	4c	gene-LOC140004963	LOC140004963	LOC140004963	lncRNA	uncharacterized LOC140004963
arabica_cultivated__vs__arabica_introgressed::chr_D_sg_C_(Scaffold_1;HRSCAF_2)::sgC	arabica_cultivated__vs__arabica_introgressed	chr_D_sg_C_(Scaffold_1;HRSCAF_2)	4c	gene-LOC113723349	LOC113723349	LOC113723349	lncRNA	uncharacterized LOC113723349
arabica_cultivated__vs__arabica_introgressed::chr_D_sg_C_(Scaffold_1;HRSCAF_2)::sgC	arabica_cultivated__vs__arabica_introgressed	chr_D_sg_C_(Scaffold_1;HRSCAF_2)	4c	gene-LOC113724369	LOC113724369	LOC113724369	protein_coding	uncharacterized LOC113724369
arabica_cultivated__vs__arabica_introgressed::chr_D_sg_C_(Scaffold_1;HRSCAF_2)::sgC	arabica_cultivated__vs__arabica_introgressed	chr_D_sg_C_(Scaffold_1;HRSCAF_2)	4c	gene-LOC140005338	LOC140005338	LOC140005338	protein_coding	uncharacterized LOC140005338
arabica_cultivated__vs__arabica_introgressed::chr_D_sg_C_(Scaffold_1;HRSCAF_2)::sgC	arabica_cultivated__vs__arabica_introgressed	chr_D_sg_C_(Scaffold_1;HRSCAF_2)	4c	gene-LOC113724370	LOC113724370	LOC113724370	protein_coding	uncharacterized LOC113724370
arabica_cultivated__vs__arabica_introgressed::chr_D_sg_C_(Scaffold_1;HRSCAF_2)::sgC	arabica_cultivated__vs__arabica_introgressed	chr_D_sg_C_(Scaffold_1;HRSCAF_2)	4c	gene-LOC140005339	LOC140005339	LOC140005339	lncRNA	uncharacterized LOC140005339
arabica_cultivated__vs__arabica_introgressed::chr_D_sg_C_(Scaffold_1;HRSCAF_2)::sgC	arabica_cultivated__vs__arabica_introgressed	chr_D_sg_C_(Scaffold_1;HRSCAF_2)	4c	gene-LOC140005340	LOC140005340	LOC140005340	lncRNA	uncharacterized LOC140005340
arabica_cultivated__vs__arabica_introgressed::chr_D_sg_C_(Scaffold_1;HRSCAF_2)::sgC	arabica_cultivated__vs__arabica_introgressed	chr_D_sg_C_(Scaffold_1;HRSCAF_2)	4c	gene-LOC140004964	LOC140004964	LOC140004964	lncRNA	uncharacterized LOC140004964
arabica_cultivated__vs__arabica_introgressed::chr_D_sg_C_(Scaffold_1;HRSCAF_2)::sgC	arabica_cultivated__vs__arabica_introgressed	chr_D_sg_C_(Scaffold_1;HRSCAF_2)	4c	gene-LOC113722282	LOC113722282	LOC113722282	protein_coding	uncharacterized LOC113722282
arabica_cultivated__vs__arabica_introgressed::chr_D_sg_C_(Scaffold_1;HRSCAF_2)::sgC	arabica_cultivated__vs__arabica_introgressed	chr_D_sg_C_(Scaffold_1;HRSCAF_2)	4c	gene-LOC113741213	LOC113741213	LOC113741213	protein_coding	pentatricopeptide repeat-containing protein At1g62350-like
arabica_cultivated__vs__arabica_introgressed::chr_D_sg_C_(Scaffold_1;HRSCAF_2)::sgC	arabica_cultivated__vs__arabica_introgressed	chr_D_sg_C_(Scaffold_1;HRSCAF_2)	4c	gene-LOC140004761	LOC140004761	LOC140004761	protein_coding	uncharacterized LOC140004761
arabica_cultivated__vs__arabica_introgressed::chr_D_sg_C_(Scaffold_1;HRSCAF_2)::sgC	arabica_cultivated__vs__arabica_introgressed	chr_D_sg_C_(Scaffold_1;HRSCAF_2)	4c	gene-LOC140004763	LOC140004763	LOC140004763	protein_coding	uncharacterized LOC140004763
arabica_cultivated__vs__arabica_introgressed::chr_D_sg_C_(Scaffold_1;HRSCAF_2)::sgC	arabica_cultivated__vs__arabica_introgressed	chr_D_sg_C_(Scaffold_1;HRSCAF_2)	4c	gene-LOC140004965	LOC140004965	LOC140004965	protein_coding	NDR1/HIN1-like protein 6
arabica_cultivated__vs__arabica_introgressed::chr_D_sg_C_(Scaffold_1;HRSCAF_2)::sgC	arabica_cultivated__vs__arabica_introgressed	chr_D_sg_C_(Scaffold_1;HRSCAF_2)	4c	gene-LOC113740176	LOC113740176	LOC113740176	protein_coding	uncharacterized LOC113740176
arabica_cultivated__vs__arabica_introgressed::chr_D_sg_C_(Scaffold_1;HRSCAF_2)::sgC	arabica_cultivated__vs__arabica_introgressed	chr_D_sg_C_(Scaffold_1;HRSCAF_2)	4c	gene-LOC140004764	LOC140004764	LOC140004764	protein_coding	uncharacterized LOC140004764
arabica_cultivated__vs__arabica_introgressed::chr_D_sg_C_(Scaffold_1;HRSCAF_2)::sgC	arabica_cultivated__vs__arabica_introgressed	chr_D_sg_C_(Scaffold_1;HRSCAF_2)	4c	gene-LOC140004966	LOC140004966	LOC140004966	lncRNA	uncharacterized LOC140004966
arabica_cultivated__vs__arabica_introgressed::chr_D_sg_C_(Scaffold_1;HRSCAF_2)::sgC	arabica_cultivated__vs__arabica_introgressed	chr_D_sg_C_(Scaffold_1;HRSCAF_2)	4c	gene-LOC113739130	LOC113739130	LOC113739130	protein_coding	uncharacterized LOC113739130
arabica_cultivated__vs__arabica_introgressed::chr_D_sg_C_(Scaffold_1;HRSCAF_2)::sgC	arabica_cultivated__vs__arabica_introgressed	chr_D_sg_C_(Scaffold_1;HRSCAF_2)	4c	gene-LOC140004765	LOC140004765	LOC140004765	protein_coding	uncharacterized LOC140004765
arabica_cultivated__vs__arabica_introgressed::chr_D_sg_C_(Scaffold_1;HRSCAF_2)::sgC	arabica_cultivated__vs__arabica_introgressed	chr_D_sg_C_(Scaffold_1;HRSCAF_2)	4c	gene-LOC113719873	LOC113719873	LOC113719873	protein_coding	nuclear transport factor 2-like
arabica_cultivated__vs__arabica_introgressed::chr_D_sg_C_(Scaffold_1;HRSCAF_2)::sgC	arabica_cultivated__vs__arabica_introgressed	chr_D_sg_C_(Scaffold_1;HRSCAF_2)	4c	gene-LOC113719878	LOC113719878	LOC113719878	protein_coding	uncharacterized LOC113719878
arabica_cultivated__vs__arabica_introgressed::chr_D_sg_C_(Scaffold_1;HRSCAF_2)::sgC	arabica_cultivated__vs__arabica_introgressed	chr_D_sg_C_(Scaffold_1;HRSCAF_2)	4c	gene-LOC113719866	LOC113719866	LOC113719866	misc_RNA	uncharacterized LOC113719866
arabica_cultivated__vs__arabica_introgressed::chr_D_sg_C_(Scaffold_1;HRSCAF_2)::sgC	arabica_cultivated__vs__arabica_introgressed	chr_D_sg_C_(Scaffold_1;HRSCAF_2)	4c	gene-LOC140004767	LOC140004767	LOC140004767	protein_coding	uncharacterized LOC140004767
arabica_cultivated__vs__arabica_introgressed::chr_D_sg_C_(Scaffold_1;HRSCAF_2)::sgC	arabica_cultivated__vs__arabica_introgressed	chr_D_sg_C_(Scaffold_1;HRSCAF_2)	4c	gene-LOC140004768	LOC140004768	LOC140004768	protein_coding	uncharacterized LOC140004768
arabica_cultivated__vs__arabica_introgressed::chr_D_sg_C_(Scaffold_1;HRSCAF_2)::sgC	arabica_cultivated__vs__arabica_introgressed	chr_D_sg_C_(Scaffold_1;HRSCAF_2)	4c	gene-LOC140004769	LOC140004769	LOC140004769	protein_coding	uncharacterized LOC140004769
arabica_cultivated__vs__arabica_introgressed::chr_D_sg_C_(Scaffold_1;HRSCAF_2)::sgC	arabica_cultivated__vs__arabica_introgressed	chr_D_sg_C_(Scaffold_1;HRSCAF_2)	4c	gene-LOC140004967	LOC140004967	LOC140004967	lncRNA	uncharacterized LOC140004967
arabica_cultivated__vs__arabica_introgressed::chr_D_sg_C_(Scaffold_1;HRSCAF_2)::sgC	arabica_cultivated__vs__arabica_introgressed	chr_D_sg_C_(Scaffold_1;HRSCAF_2)	4c	gene-LOC140004968	LOC140004968	LOC140004968	lncRNA	uncharacterized LOC140004968
arabica_cultivated__vs__arabica_introgressed::chr_D_sg_C_(Scaffold_1;HRSCAF_2)::sgC	arabica_cultivated__vs__arabica_introgressed	chr_D_sg_C_(Scaffold_1;HRSCAF_2)	4c	gene-LOC140004969	LOC140004969	LOC140004969	lncRNA	uncharacterized LOC140004969
arabica_cultivated__vs__arabica_introgressed::chr_D_sg_C_(Scaffold_1;HRSCAF_2)::sgC	arabica_cultivated__vs__arabica_introgressed	chr_D_sg_C_(Scaffold_1;HRSCAF_2)	4c	gene-LOC140004770	LOC140004770	LOC140004770	protein_coding	uncharacterized LOC140004770
arabica_cultivated__vs__arabica_introgressed::chr_D_sg_C_(Scaffold_1;HRSCAF_2)::sgC	arabica_cultivated__vs__arabica_introgressed	chr_D_sg_C_(Scaffold_1;HRSCAF_2)	4c	gene-LOC140004970	LOC140004970	LOC140004970	lncRNA	uncharacterized LOC140004970
arabica_cultivated__vs__arabica_introgressed::chr_D_sg_C_(Scaffold_1;HRSCAF_2)::sgC	arabica_cultivated__vs__arabica_introgressed	chr_D_sg_C_(Scaffold_1;HRSCAF_2)	4c	gene-LOC140005342	LOC140005342	LOC140005342	lncRNA	uncharacterized LOC140005342
arabica_cultivated__vs__arabica_introgressed::chr_D_sg_C_(Scaffold_1;HRSCAF_2)::sgC	arabica_cultivated__vs__arabica_introgressed	chr_D_sg_C_(Scaffold_1;HRSCAF_2)	4c	gene-LOC113720290	LOC113720290	LOC113720290	protein_coding	uncharacterized LOC113720290
arabica_cultivated__vs__arabica_introgressed::chr_D_sg_C_(Scaffold_1;HRSCAF_2)::sgC	arabica_cultivated__vs__arabica_introgressed	chr_D_sg_C_(Scaffold_1;HRSCAF_2)	4c	gene-LOC113740052	LOC113740052	LOC113740052	protein_coding	uncharacterized LOC113740052
arabica_cultivated__vs__arabica_introgressed::chr_D_sg_C_(Scaffold_1;HRSCAF_2)::sgC	arabica_cultivated__vs__arabica_introgressed	chr_D_sg_C_(Scaffold_1;HRSCAF_2)	4c	gene-LOC140004772	LOC140004772	LOC140004772	protein_coding	uncharacterized LOC140004772
arabica_cultivated__vs__arabica_introgressed::chr_D_sg_C_(Scaffold_1;HRSCAF_2)::sgC	arabica_cultivated__vs__arabica_introgressed	chr_D_sg_C_(Scaffold_1;HRSCAF_2)	4c	gene-LOC113739138	LOC113739138	LOC113739138	protein_coding	protein FAR1-RELATED SEQUENCE 5-like
arabica_cultivated__vs__arabica_introgressed::chr_D_sg_C_(Scaffold_1;HRSCAF_2)::sgC	arabica_cultivated__vs__arabica_introgressed	chr_D_sg_C_(Scaffold_1;HRSCAF_2)	4c	gene-LOC113739137	LOC113739137	LOC113739137	protein_coding	protein FAR1-RELATED SEQUENCE 5-like
arabica_cultivated__vs__arabica_introgressed::chr_D_sg_C_(Scaffold_1;HRSCAF_2)::sgC	arabica_cultivated__vs__arabica_introgressed	chr_D_sg_C_(Scaffold_1;HRSCAF_2)	4c	gene-LOC113738524	LOC113738524	LOC113738524	lncRNA	uncharacterized LOC113738524
arabica_cultivated__vs__arabica_introgressed::chr_D_sg_C_(Scaffold_1;HRSCAF_2)::sgC	arabica_cultivated__vs__arabica_introgressed	chr_D_sg_C_(Scaffold_1;HRSCAF_2)	4c	gene-LOC140004773	LOC140004773	LOC140004773	protein_coding	uncharacterized LOC140004773
arabica_cultivated__vs__arabica_introgressed::chr_D_sg_C_(Scaffold_1;HRSCAF_2)::sgC	arabica_cultivated__vs__arabica_introgressed	chr_D_sg_C_(Scaffold_1;HRSCAF_2)	4c	gene-LOC113708326	LOC113708326	LOC113708326	protein_coding	uncharacterized LOC113708326
arabica_cultivated__vs__arabica_introgressed::chr_D_sg_C_(Scaffold_1;HRSCAF_2)::sgC	arabica_cultivated__vs__arabica_introgressed	chr_D_sg_C_(Scaffold_1;HRSCAF_2)	4c	gene-LOC140004775	LOC140004775	LOC140004775	protein_coding	uncharacterized LOC140004775
arabica_cultivated__vs__arabica_introgressed::chr_D_sg_C_(Scaffold_1;HRSCAF_2)::sgC	arabica_cultivated__vs__arabica_introgressed	chr_D_sg_C_(Scaffold_1;HRSCAF_2)	4c	gene-LOC113740414	LOC113740414	LOC113740414	protein_coding	uncharacterized LOC113740414
arabica_cultivated__vs__arabica_introgressed::chr_D_sg_C_(Scaffold_1;HRSCAF_2)::sgC	arabica_cultivated__vs__arabica_introgressed	chr_D_sg_C_(Scaffold_1;HRSCAF_2)	4c	gene-LOC113740067	LOC113740067	LOC113740067	protein_coding	protein LONGIFOLIA 1-like
arabica_cultivated__vs__arabica_introgressed::chr_D_sg_C_(Scaffold_1;HRSCAF_2)::sgC	arabica_cultivated__vs__arabica_introgressed	chr_D_sg_C_(Scaffold_1;HRSCAF_2)	4c	gene-LOC113740489	LOC113740489	LOC113740489	snoRNA	small nucleolar RNA R71
arabica_cultivated__vs__arabica_introgressed::chr_D_sg_C_(Scaffold_1;HRSCAF_2)::sgC	arabica_cultivated__vs__arabica_introgressed	chr_D_sg_C_(Scaffold_1;HRSCAF_2)	4c	gene-LOC140004971	LOC140004971	LOC140004971	lncRNA	uncharacterized LOC140004971
arabica_cultivated__vs__arabica_introgressed::chr_D_sg_C_(Scaffold_1;HRSCAF_2)::sgC	arabica_cultivated__vs__arabica_introgressed	chr_D_sg_C_(Scaffold_1;HRSCAF_2)	4c	gene-LOC113740071	LOC113740071	LOC113740071	protein_coding	transcription termination factor MTERF15%2C mitochondrial
arabica_cultivated__vs__arabica_introgressed::chr_D_sg_C_(Scaffold_1;HRSCAF_2)::sgC	arabica_cultivated__vs__arabica_introgressed	chr_D_sg_C_(Scaffold_1;HRSCAF_2)	4c	gene-LOC113740070	LOC113740070	LOC113740070	protein_coding	ABC transporter B family member 25	transport_membrane
arabica_cultivated__vs__arabica_introgressed::chr_D_sg_C_(Scaffold_1;HRSCAF_2)::sgC	arabica_cultivated__vs__arabica_introgressed	chr_D_sg_C_(Scaffold_1;HRSCAF_2)	4c	gene-LOC140004776	LOC140004776	LOC140004776	protein_coding	uncharacterized LOC140004776
arabica_cultivated__vs__arabica_introgressed::chr_D_sg_C_(Scaffold_1;HRSCAF_2)::sgC	arabica_cultivated__vs__arabica_introgressed	chr_D_sg_C_(Scaffold_1;HRSCAF_2)	4c	gene-LOC140004778	LOC140004778	LOC140004778	protein_coding	uncharacterized LOC140004778
arabica_cultivated__vs__arabica_introgressed::chr_D_sg_C_(Scaffold_1;HRSCAF_2)::sgC	arabica_cultivated__vs__arabica_introgressed	chr_D_sg_C_(Scaffold_1;HRSCAF_2)	4c	gene-LOC140004779	LOC140004779	LOC140004779	protein_coding	uncharacterized LOC140004779
arabica_cultivated__vs__arabica_introgressed::chr_D_sg_C_(Scaffold_1;HRSCAF_2)::sgC	arabica_cultivated__vs__arabica_introgressed	chr_D_sg_C_(Scaffold_1;HRSCAF_2)	4c	gene-LOC140004780	LOC140004780	LOC140004780	protein_coding	uncharacterized LOC140004780
arabica_cultivated__vs__arabica_introgressed::chr_D_sg_C_(Scaffold_1;HRSCAF_2)::sgC	arabica_cultivated__vs__arabica_introgressed	chr_D_sg_C_(Scaffold_1;HRSCAF_2)	4c	gene-LOC140004781	LOC140004781	LOC140004781	protein_coding	uncharacterized LOC140004781
arabica_cultivated__vs__arabica_introgressed::chr_D_sg_C_(Scaffold_1;HRSCAF_2)::sgC	arabica_cultivated__vs__arabica_introgressed	chr_D_sg_C_(Scaffold_1;HRSCAF_2)	4c	gene-LOC113738477	LOC113738477	LOC113738477	protein_coding	glycerophosphodiester phosphodiesterase GDPD6-like
arabica_cultivated__vs__arabica_introgressed::chr_D_sg_C_(Scaffold_1;HRSCAF_2)::sgC	arabica_cultivated__vs__arabica_introgressed	chr_D_sg_C_(Scaffold_1;HRSCAF_2)	4c	gene-LOC140004783	LOC140004783	LOC140004783	protein_coding	uncharacterized LOC140004783
arabica_cultivated__vs__arabica_introgressed::chr_D_sg_C_(Scaffold_1;HRSCAF_2)::sgC	arabica_cultivated__vs__arabica_introgressed	chr_D_sg_C_(Scaffold_1;HRSCAF_2)	4c	gene-LOC140004784	LOC140004784	LOC140004784	protein_coding	uncharacterized LOC140004784
arabica_cultivated__vs__arabica_introgressed::chr_D_sg_C_(Scaffold_1;HRSCAF_2)::sgC	arabica_cultivated__vs__arabica_introgressed	chr_D_sg_C_(Scaffold_1;HRSCAF_2)	4c	gene-LOC140004785	LOC140004785	LOC140004785	protein_coding	uncharacterized LOC140004785
arabica_cultivated__vs__arabica_introgressed::chr_D_sg_C_(Scaffold_1;HRSCAF_2)::sgC	arabica_cultivated__vs__arabica_introgressed	chr_D_sg_C_(Scaffold_1;HRSCAF_2)	4c	gene-LOC140004786	LOC140004786	LOC140004786	protein_coding	uncharacterized LOC140004786
arabica_cultivated__vs__arabica_introgressed::chr_D_sg_C_(Scaffold_1;HRSCAF_2)::sgC	arabica_cultivated__vs__arabica_introgressed	chr_D_sg_C_(Scaffold_1;HRSCAF_2)	4c	gene-LOC140004972	LOC140004972	LOC140004972	lncRNA	uncharacterized LOC140004972
arabica_cultivated__vs__arabica_introgressed::chr_D_sg_C_(Scaffold_1;HRSCAF_2)::sgC	arabica_cultivated__vs__arabica_introgressed	chr_D_sg_C_(Scaffold_1;HRSCAF_2)	4c	gene-LOC140004787	LOC140004787	LOC140004787	protein_coding	uncharacterized LOC140004787
arabica_cultivated__vs__arabica_introgressed::chr_D_sg_C_(Scaffold_1;HRSCAF_2)::sgC	arabica_cultivated__vs__arabica_introgressed	chr_D_sg_C_(Scaffold_1;HRSCAF_2)	4c	gene-LOC140004973	LOC140004973	LOC140004973	lncRNA	uncharacterized LOC140004973
arabica_cultivated__vs__arabica_introgressed::chr_D_sg_C_(Scaffold_1;HRSCAF_2)::sgC	arabica_cultivated__vs__arabica_introgressed	chr_D_sg_C_(Scaffold_1;HRSCAF_2)	4c	gene-LOC140004974	LOC140004974	LOC140004974	lncRNA	uncharacterized LOC140004974
arabica_cultivated__vs__arabica_introgressed::chr_D_sg_C_(Scaffold_1;HRSCAF_2)::sgC	arabica_cultivated__vs__arabica_introgressed	chr_D_sg_C_(Scaffold_1;HRSCAF_2)	4c	gene-LOC140004975	LOC140004975	LOC140004975	lncRNA	uncharacterized LOC140004975
arabica_cultivated__vs__arabica_introgressed::chr_D_sg_C_(Scaffold_1;HRSCAF_2)::sgC	arabica_cultivated__vs__arabica_introgressed	chr_D_sg_C_(Scaffold_1;HRSCAF_2)	4c	gene-LOC113739148	LOC113739148	LOC113739148	protein_coding	B3 domain-containing protein At3g17010-like
arabica_cultivated__vs__arabica_introgressed::chr_D_sg_C_(Scaffold_1;HRSCAF_2)::sgC	arabica_cultivated__vs__arabica_introgressed	chr_D_sg_C_(Scaffold_1;HRSCAF_2)	4c	gene-LOC113705174	LOC113705174	LOC113705174	snoRNA	small nucleolar RNA R71
arabica_cultivated__vs__arabica_introgressed::chr_D_sg_C_(Scaffold_1;HRSCAF_2)::sgC	arabica_cultivated__vs__arabica_introgressed	chr_D_sg_C_(Scaffold_1;HRSCAF_2)	4c	gene-LOC140004976	LOC140004976	LOC140004976	lncRNA	uncharacterized LOC140004976
arabica_cultivated__vs__arabica_introgressed::chr_D_sg_C_(Scaffold_1;HRSCAF_2)::sgC	arabica_cultivated__vs__arabica_introgressed	chr_D_sg_C_(Scaffold_1;HRSCAF_2)	4c	gene-LOC140004977	LOC140004977	LOC140004977	lncRNA	uncharacterized LOC140004977
arabica_cultivated__vs__arabica_introgressed::chr_D_sg_C_(Scaffold_1;HRSCAF_2)::sgC	arabica_cultivated__vs__arabica_introgressed	chr_D_sg_C_(Scaffold_1;HRSCAF_2)	4c	gene-LOC140004978	LOC140004978	LOC140004978	lncRNA	uncharacterized LOC140004978
arabica_cultivated__vs__arabica_introgressed::chr_D_sg_C_(Scaffold_1;HRSCAF_2)::sgC	arabica_cultivated__vs__arabica_introgressed	chr_D_sg_C_(Scaffold_1;HRSCAF_2)	4c	gene-LOC140004788	LOC140004788	LOC140004788	protein_coding	uncharacterized LOC140004788
arabica_cultivated__vs__arabica_introgressed::chr_D_sg_C_(Scaffold_1;HRSCAF_2)::sgC	arabica_cultivated__vs__arabica_introgressed	chr_D_sg_C_(Scaffold_1;HRSCAF_2)	4c	gene-LOC140005343	LOC140005343	LOC140005343	lncRNA	uncharacterized LOC140005343
arabica_cultivated__vs__arabica_introgressed::chr_D_sg_C_(Scaffold_1;HRSCAF_2)::sgC	arabica_cultivated__vs__arabica_introgressed	chr_D_sg_C_(Scaffold_1;HRSCAF_2)	4c	gene-LOC113740109	LOC113740109	LOC113740109	protein_coding	glycerophosphodiester phosphodiesterase GDPD6-like
arabica_cultivated__vs__arabica_introgressed::chr_D_sg_C_(Scaffold_1;HRSCAF_2)::sgC	arabica_cultivated__vs__arabica_introgressed	chr_D_sg_C_(Scaffold_1;HRSCAF_2)	4c	gene-LOC113738692	LOC113738692	LOC113738692	protein_coding	replication protein A 70 kDa DNA-binding subunit B-like
arabica_cultivated__vs__arabica_introgressed::chr_D_sg_C_(Scaffold_1;HRSCAF_2)::sgC	arabica_cultivated__vs__arabica_introgressed	chr_D_sg_C_(Scaffold_1;HRSCAF_2)	4c	gene-LOC140004979	LOC140004979	LOC140004979	lncRNA	uncharacterized LOC140004979
arabica_cultivated__vs__arabica_introgressed::chr_D_sg_C_(Scaffold_1;HRSCAF_2)::sgC	arabica_cultivated__vs__arabica_introgressed	chr_D_sg_C_(Scaffold_1;HRSCAF_2)	4c	gene-LOC140004790	LOC140004790	LOC140004790	protein_coding	uncharacterized LOC140004790
arabica_cultivated__vs__arabica_introgressed::chr_D_sg_C_(Scaffold_1;HRSCAF_2)::sgC	arabica_cultivated__vs__arabica_introgressed	chr_D_sg_C_(Scaffold_1;HRSCAF_2)	4c	gene-LOC113739149	LOC113739149	LOC113739149	protein_coding	uncharacterized LOC113739149
arabica_cultivated__vs__arabica_introgressed::chr_D_sg_C_(Scaffold_1;HRSCAF_2)::sgC	arabica_cultivated__vs__arabica_introgressed	chr_D_sg_C_(Scaffold_1;HRSCAF_2)	4c	gene-LOC140004791	LOC140004791	LOC140004791	protein_coding	uncharacterized LOC140004791
arabica_cultivated__vs__arabica_introgressed::chr_D_sg_C_(Scaffold_1;HRSCAF_2)::sgC	arabica_cultivated__vs__arabica_introgressed	chr_D_sg_C_(Scaffold_1;HRSCAF_2)	4c	gene-LOC140004792	LOC140004792	LOC140004792	protein_coding	uncharacterized LOC140004792
arabica_cultivated__vs__arabica_introgressed::chr_D_sg_C_(Scaffold_1;HRSCAF_2)::sgC	arabica_cultivated__vs__arabica_introgressed	chr_D_sg_C_(Scaffold_1;HRSCAF_2)	4c	gene-LOC140004793	LOC140004793	LOC140004793	protein_coding	uncharacterized LOC140004793
arabica_cultivated__vs__arabica_introgressed::chr_D_sg_C_(Scaffold_1;HRSCAF_2)::sgC	arabica_cultivated__vs__arabica_introgressed	chr_D_sg_C_(Scaffold_1;HRSCAF_2)	4c	gene-LOC140004794	LOC140004794	LOC140004794	protein_coding	uncharacterized LOC140004794
arabica_cultivated__vs__arabica_introgressed::chr_D_sg_C_(Scaffold_1;HRSCAF_2)::sgC	arabica_cultivated__vs__arabica_introgressed	chr_D_sg_C_(Scaffold_1;HRSCAF_2)	4c	gene-LOC140004795	LOC140004795	LOC140004795	protein_coding	uncharacterized LOC140004795
arabica_cultivated__vs__arabica_introgressed::chr_D_sg_C_(Scaffold_1;HRSCAF_2)::sgC	arabica_cultivated__vs__arabica_introgressed	chr_D_sg_C_(Scaffold_1;HRSCAF_2)	4c	gene-LOC113708299	LOC113708299	LOC113708299	protein_coding	protein FAR1-RELATED SEQUENCE 5-like
arabica_cultivated__vs__arabica_introgressed::chr_D_sg_C_(Scaffold_1;HRSCAF_2)::sgC	arabica_cultivated__vs__arabica_introgressed	chr_D_sg_C_(Scaffold_1;HRSCAF_2)	4c	gene-LOC113708811	LOC113708811	LOC113708811	protein_coding	UDP-arabinopyranose mutase 3
arabica_cultivated__vs__arabica_introgressed::chr_D_sg_C_(Scaffold_1;HRSCAF_2)::sgC	arabica_cultivated__vs__arabica_introgressed	chr_D_sg_C_(Scaffold_1;HRSCAF_2)	4c	gene-LOC113722568	LOC113722568	LOC113722568	protein_coding	uncharacterized LOC113722568
arabica_cultivated__vs__arabica_introgressed::chr_D_sg_C_(Scaffold_1;HRSCAF_2)::sgC	arabica_cultivated__vs__arabica_introgressed	chr_D_sg_C_(Scaffold_1;HRSCAF_2)	4c	gene-LOC113692230	LOC113692230	LOC113692230	protein_coding	putative B3 domain-containing protein Os03g0621600
arabica_cultivated__vs__arabica_introgressed::chr_D_sg_C_(Scaffold_1;HRSCAF_2)::sgC	arabica_cultivated__vs__arabica_introgressed	chr_D_sg_C_(Scaffold_1;HRSCAF_2)	4c	gene-LOC113691788	LOC113691788	LOC113691788	protein_coding	DNAJ protein JJJ1 homolog
arabica_cultivated__vs__arabica_introgressed::chr_D_sg_C_(Scaffold_1;HRSCAF_2)::sgC	arabica_cultivated__vs__arabica_introgressed	chr_D_sg_C_(Scaffold_1;HRSCAF_2)	4c	gene-LOC113693845	LOC113693845	LOC113693845	protein_coding	histone deacetylase 5-like
arabica_cultivated__vs__arabica_introgressed::chr_D_sg_C_(Scaffold_1;HRSCAF_2)::sgC	arabica_cultivated__vs__arabica_introgressed	chr_D_sg_C_(Scaffold_1;HRSCAF_2)	4c	gene-LOC113692304	LOC113692304	LOC113692304	lncRNA	uncharacterized LOC113692304
arabica_cultivated__vs__arabica_introgressed::chr_D_sg_C_(Scaffold_1;HRSCAF_2)::sgC	arabica_cultivated__vs__arabica_introgressed	chr_D_sg_C_(Scaffold_1;HRSCAF_2)	4c	gene-LOC113693523	LOC113693523	LOC113693523	protein_coding	uncharacterized LOC113693523
arabica_cultivated__vs__arabica_introgressed::chr_D_sg_C_(Scaffold_1;HRSCAF_2)::sgC	arabica_cultivated__vs__arabica_introgressed	chr_D_sg_C_(Scaffold_1;HRSCAF_2)	4c	gene-LOC140004797	LOC140004797	LOC140004797	protein_coding	uncharacterized LOC140004797
arabica_cultivated__vs__arabica_introgressed::chr_D_sg_C_(Scaffold_1;HRSCAF_2)::sgC	arabica_cultivated__vs__arabica_introgressed	chr_D_sg_C_(Scaffold_1;HRSCAF_2)	4c	gene-LOC113738811	LOC113738811	LOC113738811	protein_coding	E3 ubiquitin-protein ligase ORTHRUS 2-like
arabica_cultivated__vs__arabica_introgressed::chr_D_sg_C_(Scaffold_1;HRSCAF_2)::sgC	arabica_cultivated__vs__arabica_introgressed	chr_D_sg_C_(Scaffold_1;HRSCAF_2)	4c	gene-LOC113738438	LOC113738438	LOC113738438	lncRNA	uncharacterized LOC113738438
arabica_cultivated__vs__arabica_introgressed::chr_D_sg_C_(Scaffold_1;HRSCAF_2)::sgC	arabica_cultivated__vs__arabica_introgressed	chr_D_sg_C_(Scaffold_1;HRSCAF_2)	4c	gene-LOC140004798	LOC140004798	LOC140004798	protein_coding	uncharacterized LOC140004798
arabica_cultivated__vs__arabica_introgressed::chr_D_sg_C_(Scaffold_1;HRSCAF_2)::sgC	arabica_cultivated__vs__arabica_introgressed	chr_D_sg_C_(Scaffold_1;HRSCAF_2)	4c	gene-LOC113739158	LOC113739158	LOC113739158	protein_coding	protein FAR1-RELATED SEQUENCE 5-like
arabica_cultivated__vs__arabica_introgressed::chr_D_sg_C_(Scaffold_1;HRSCAF_2)::sgC	arabica_cultivated__vs__arabica_introgressed	chr_D_sg_C_(Scaffold_1;HRSCAF_2)	4c	gene-LOC113738806	LOC113738806	LOC113738806	protein_coding	uncharacterized LOC113738806
arabica_cultivated__vs__arabica_introgressed::chr_D_sg_C_(Scaffold_1;HRSCAF_2)::sgC	arabica_cultivated__vs__arabica_introgressed	chr_D_sg_C_(Scaffold_1;HRSCAF_2)	4c	gene-LOC140005344	LOC140005344	LOC140005344	lncRNA	uncharacterized LOC140005344
arabica_cultivated__vs__arabica_introgressed::chr_D_sg_C_(Scaffold_1;HRSCAF_2)::sgC	arabica_cultivated__vs__arabica_introgressed	chr_D_sg_C_(Scaffold_1;HRSCAF_2)	4c	gene-LOC140005345	LOC140005345	LOC140005345	lncRNA	uncharacterized LOC140005345
arabica_cultivated__vs__arabica_introgressed::chr_D_sg_C_(Scaffold_1;HRSCAF_2)::sgC	arabica_cultivated__vs__arabica_introgressed	chr_D_sg_C_(Scaffold_1;HRSCAF_2)	4c	gene-LOC113738785	LOC113738785	LOC113738785	protein_coding	PHD finger-containing protein 6
arabica_cultivated__vs__arabica_introgressed::chr_D_sg_C_(Scaffold_1;HRSCAF_2)::sgC	arabica_cultivated__vs__arabica_introgressed	chr_D_sg_C_(Scaffold_1;HRSCAF_2)	4c	gene-LOC140004980	LOC140004980	LOC140004980	lncRNA	uncharacterized LOC140004980
arabica_cultivated__vs__arabica_introgressed::chr_D_sg_C_(Scaffold_1;HRSCAF_2)::sgC	arabica_cultivated__vs__arabica_introgressed	chr_D_sg_C_(Scaffold_1;HRSCAF_2)	4c	gene-LOC113738534	LOC113738534	LOC113738534	protein_coding	uncharacterized LOC113738534
arabica_cultivated__vs__arabica_introgressed::chr_D_sg_C_(Scaffold_1;HRSCAF_2)::sgC	arabica_cultivated__vs__arabica_introgressed	chr_D_sg_C_(Scaffold_1;HRSCAF_2)	4c	gene-LOC113739160	LOC113739160	LOC113739160	protein_coding	uncharacterized LOC113739160
arabica_cultivated__vs__arabica_introgressed::chr_D_sg_C_(Scaffold_1;HRSCAF_2)::sgC	arabica_cultivated__vs__arabica_introgressed	chr_D_sg_C_(Scaffold_1;HRSCAF_2)	4c	gene-LOC140005347	LOC140005347	LOC140005347	lncRNA	uncharacterized LOC140005347
arabica_cultivated__vs__arabica_introgressed::chr_D_sg_C_(Scaffold_1;HRSCAF_2)::sgC	arabica_cultivated__vs__arabica_introgressed	chr_D_sg_C_(Scaffold_1;HRSCAF_2)	4c	gene-LOC113740161	LOC113740161	LOC113740161	protein_coding	uncharacterized LOC113740161
arabica_cultivated__vs__arabica_introgressed::chr_D_sg_C_(Scaffold_1;HRSCAF_2)::sgC	arabica_cultivated__vs__arabica_introgressed	chr_D_sg_C_(Scaffold_1;HRSCAF_2)	4c	gene-LOC113740160	LOC113740160	LOC113740160	protein_coding	probable glutathione peroxidase 2
arabica_cultivated__vs__arabica_introgressed::chr_D_sg_C_(Scaffold_1;HRSCAF_2)::sgC	arabica_cultivated__vs__arabica_introgressed	chr_D_sg_C_(Scaffold_1;HRSCAF_2)	4c	gene-LOC113740493	LOC113740493	LOC113740493	snoRNA	small nucleolar RNA R71
arabica_cultivated__vs__arabica_introgressed::chr_D_sg_C_(Scaffold_1;HRSCAF_2)::sgC	arabica_cultivated__vs__arabica_introgressed	chr_D_sg_C_(Scaffold_1;HRSCAF_2)	4c	gene-LOC113739161	LOC113739161	LOC113739161	protein_coding	uncharacterized LOC113739161
arabica_cultivated__vs__arabica_introgressed::chr_D_sg_C_(Scaffold_1;HRSCAF_2)::sgC	arabica_cultivated__vs__arabica_introgressed	chr_D_sg_C_(Scaffold_1;HRSCAF_2)	4c	gene-LOC140004799	LOC140004799	LOC140004799	protein_coding	uncharacterized LOC140004799
arabica_cultivated__vs__arabica_introgressed::chr_D_sg_C_(Scaffold_1;HRSCAF_2)::sgC	arabica_cultivated__vs__arabica_introgressed	chr_D_sg_C_(Scaffold_1;HRSCAF_2)	4c	gene-LOC113739162	LOC113739162	LOC113739162	protein_coding	uncharacterized LOC113739162
arabica_cultivated__vs__arabica_introgressed::chr_D_sg_C_(Scaffold_1;HRSCAF_2)::sgC	arabica_cultivated__vs__arabica_introgressed	chr_D_sg_C_(Scaffold_1;HRSCAF_2)	4c	gene-LOC140004800	LOC140004800	LOC140004800	protein_coding	uncharacterized LOC140004800
arabica_cultivated__vs__arabica_introgressed::chr_D_sg_C_(Scaffold_1;HRSCAF_2)::sgC	arabica_cultivated__vs__arabica_introgressed	chr_D_sg_C_(Scaffold_1;HRSCAF_2)	4c	gene-LOC113739163	LOC113739163	LOC113739163	protein_coding	uncharacterized LOC113739163
arabica_cultivated__vs__arabica_introgressed::chr_D_sg_C_(Scaffold_1;HRSCAF_2)::sgC	arabica_cultivated__vs__arabica_introgressed	chr_D_sg_C_(Scaffold_1;HRSCAF_2)	4c	gene-LOC113739166	LOC113739166	LOC113739166	protein_coding	uncharacterized LOC113739166
arabica_cultivated__vs__arabica_introgressed::chr_D_sg_C_(Scaffold_1;HRSCAF_2)::sgC	arabica_cultivated__vs__arabica_introgressed	chr_D_sg_C_(Scaffold_1;HRSCAF_2)	4c	gene-LOC140005348	LOC140005348	LOC140005348	lncRNA	uncharacterized LOC140005348
arabica_cultivated__vs__arabica_introgressed::chr_D_sg_C_(Scaffold_1;HRSCAF_2)::sgC	arabica_cultivated__vs__arabica_introgressed	chr_D_sg_C_(Scaffold_1;HRSCAF_2)	4c	gene-LOC113739497	LOC113739497	LOC113739497	lncRNA	uncharacterized LOC113739497
arabica_cultivated__vs__arabica_introgressed::chr_D_sg_C_(Scaffold_1;HRSCAF_2)::sgC	arabica_cultivated__vs__arabica_introgressed	chr_D_sg_C_(Scaffold_1;HRSCAF_2)	4c	gene-LOC113740165	LOC113740165	LOC113740165	protein_coding	PLASMODESMATA CALLOSE-BINDING PROTEIN 2
arabica_cultivated__vs__arabica_introgressed::chr_D_sg_C_(Scaffold_1;HRSCAF_2)::sgC	arabica_cultivated__vs__arabica_introgressed	chr_D_sg_C_(Scaffold_1;HRSCAF_2)	4c	gene-LOC140004801	LOC140004801	LOC140004801	protein_coding	uncharacterized LOC140004801
arabica_cultivated__vs__arabica_introgressed::chr_D_sg_C_(Scaffold_1;HRSCAF_2)::sgC	arabica_cultivated__vs__arabica_introgressed	chr_D_sg_C_(Scaffold_1;HRSCAF_2)	4c	gene-LOC113739167	LOC113739167	LOC113739167	protein_coding	DExH-box ATP-dependent RNA helicase DExH14
arabica_cultivated__vs__arabica_introgressed::chr_D_sg_C_(Scaffold_1;HRSCAF_2)::sgC	arabica_cultivated__vs__arabica_introgressed	chr_D_sg_C_(Scaffold_1;HRSCAF_2)	4c	gene-LOC113738575	LOC113738575	LOC113738575	protein_coding	protein CANDIDATE G-PROTEIN COUPLED RECEPTOR 2	defense_receptor
arabica_cultivated__vs__arabica_introgressed::chr_D_sg_C_(Scaffold_1;HRSCAF_2)::sgC	arabica_cultivated__vs__arabica_introgressed	chr_D_sg_C_(Scaffold_1;HRSCAF_2)	4c	gene-LOC113739372	LOC113739372	LOC113739372	lncRNA	uncharacterized LOC113739372
arabica_cultivated__vs__arabica_introgressed::chr_D_sg_C_(Scaffold_1;HRSCAF_2)::sgC	arabica_cultivated__vs__arabica_introgressed	chr_D_sg_C_(Scaffold_1;HRSCAF_2)	4c	gene-LOC140004803	LOC140004803	LOC140004803	protein_coding	uncharacterized LOC140004803
arabica_cultivated__vs__arabica_introgressed::chr_D_sg_C_(Scaffold_1;HRSCAF_2)::sgC	arabica_cultivated__vs__arabica_introgressed	chr_D_sg_C_(Scaffold_1;HRSCAF_2)	4c	gene-LOC140004805	LOC140004805	LOC140004805	protein_coding	uncharacterized LOC140004805
arabica_cultivated__vs__arabica_introgressed::chr_D_sg_C_(Scaffold_1;HRSCAF_2)::sgC	arabica_cultivated__vs__arabica_introgressed	chr_D_sg_C_(Scaffold_1;HRSCAF_2)	4c	gene-LOC140005349	LOC140005349	LOC140005349	lncRNA	uncharacterized LOC140005349
arabica_cultivated__vs__arabica_introgressed::chr_D_sg_C_(Scaffold_1;HRSCAF_2)::sgC	arabica_cultivated__vs__arabica_introgressed	chr_D_sg_C_(Scaffold_1;HRSCAF_2)	4c	gene-LOC113739491	LOC113739491	LOC113739491	protein_coding	F-box/kelch-repeat protein At3g06240-like
arabica_cultivated__vs__arabica_introgressed::chr_D_sg_C_(Scaffold_1;HRSCAF_2)::sgC	arabica_cultivated__vs__arabica_introgressed	chr_D_sg_C_(Scaffold_1;HRSCAF_2)	4c	gene-LOC140005350	LOC140005350	LOC140005350	lncRNA	uncharacterized LOC140005350
arabica_cultivated__vs__arabica_introgressed::chr_D_sg_C_(Scaffold_1;HRSCAF_2)::sgC	arabica_cultivated__vs__arabica_introgressed	chr_D_sg_C_(Scaffold_1;HRSCAF_2)	4c	gene-LOC113738601	LOC113738601	LOC113738601	protein_coding	flavonoid 3'-monooxygenase
arabica_cultivated__vs__arabica_introgressed::chr_D_sg_C_(Scaffold_1;HRSCAF_2)::sgC	arabica_cultivated__vs__arabica_introgressed	chr_D_sg_C_(Scaffold_1;HRSCAF_2)	4c	gene-LOC113739170	LOC113739170	LOC113739170	protein_coding	uncharacterized LOC113739170
arabica_cultivated__vs__arabica_introgressed::chr_D_sg_C_(Scaffold_1;HRSCAF_2)::sgC	arabica_cultivated__vs__arabica_introgressed	chr_D_sg_C_(Scaffold_1;HRSCAF_2)	4c	gene-LOC113739171	LOC113739171	LOC113739171	protein_coding	uncharacterized LOC113739171
arabica_cultivated__vs__arabica_introgressed::chr_D_sg_C_(Scaffold_1;HRSCAF_2)::sgC	arabica_cultivated__vs__arabica_introgressed	chr_D_sg_C_(Scaffold_1;HRSCAF_2)	4c	gene-LOC140004806	LOC140004806	LOC140004806	protein_coding	zinc finger BED domain-containing protein RICESLEEPER 2-like
arabica_cultivated__vs__arabica_introgressed::chr_D_sg_C_(Scaffold_1;HRSCAF_2)::sgC	arabica_cultivated__vs__arabica_introgressed	chr_D_sg_C_(Scaffold_1;HRSCAF_2)	4c	gene-LOC140004981	LOC140004981	LOC140004981	lncRNA	uncharacterized LOC140004981
arabica_cultivated__vs__arabica_introgressed::chr_D_sg_C_(Scaffold_1;HRSCAF_2)::sgC	arabica_cultivated__vs__arabica_introgressed	chr_D_sg_C_(Scaffold_1;HRSCAF_2)	4c	gene-LOC113740448	LOC113740448	LOC113740448	protein_coding	flavonoid 3'-monooxygenase-like
arabica_cultivated__vs__arabica_introgressed::chr_D_sg_C_(Scaffold_1;HRSCAF_2)::sgC	arabica_cultivated__vs__arabica_introgressed	chr_D_sg_C_(Scaffold_1;HRSCAF_2)	4c	gene-LOC140004807	LOC140004807	LOC140004807	protein_coding	uncharacterized LOC140004807
arabica_cultivated__vs__arabica_introgressed::chr_D_sg_C_(Scaffold_1;HRSCAF_2)::sgC	arabica_cultivated__vs__arabica_introgressed	chr_D_sg_C_(Scaffold_1;HRSCAF_2)	4c	gene-LOC113740171	LOC113740171	LOC113740171	protein_coding	chaperone protein ClpB1
arabica_cultivated__vs__arabica_introgressed::chr_D_sg_C_(Scaffold_1;HRSCAF_2)::sgC	arabica_cultivated__vs__arabica_introgressed	chr_D_sg_C_(Scaffold_1;HRSCAF_2)	4c	gene-LOC140005351	LOC140005351	LOC140005351	lncRNA	uncharacterized LOC140005351
arabica_cultivated__vs__arabica_introgressed::chr_D_sg_C_(Scaffold_1;HRSCAF_2)::sgC	arabica_cultivated__vs__arabica_introgressed	chr_D_sg_C_(Scaffold_1;HRSCAF_2)	4c	gene-LOC113738755	LOC113738755	LOC113738755	protein_coding	urease accessory protein F
arabica_cultivated__vs__arabica_introgressed::chr_D_sg_C_(Scaffold_1;HRSCAF_2)::sgC	arabica_cultivated__vs__arabica_introgressed	chr_D_sg_C_(Scaffold_1;HRSCAF_2)	4c	gene-LOC140005353	LOC140005353	LOC140005353	lncRNA	uncharacterized LOC140005353
arabica_cultivated__vs__arabica_introgressed::chr_D_sg_C_(Scaffold_1;HRSCAF_2)::sgC	arabica_cultivated__vs__arabica_introgressed	chr_D_sg_C_(Scaffold_1;HRSCAF_2)	4c	gene-LOC140005352	LOC140005352	LOC140005352	lncRNA	uncharacterized LOC140005352
arabica_cultivated__vs__arabica_introgressed::chr_D_sg_C_(Scaffold_1;HRSCAF_2)::sgC	arabica_cultivated__vs__arabica_introgressed	chr_D_sg_C_(Scaffold_1;HRSCAF_2)	4c	gene-LOC140005354	LOC140005354	LOC140005354	lncRNA	uncharacterized LOC140005354
arabica_cultivated__vs__arabica_introgressed::chr_D_sg_C_(Scaffold_1;HRSCAF_2)::sgC	arabica_cultivated__vs__arabica_introgressed	chr_D_sg_C_(Scaffold_1;HRSCAF_2)	4c	gene-LOC113738723	LOC113738723	LOC113738723	protein_coding	protein ANTAGONIST OF LIKE HETEROCHROMATIN PROTEIN 1-like
arabica_cultivated__vs__arabica_introgressed::chr_D_sg_C_(Scaffold_1;HRSCAF_2)::sgC	arabica_cultivated__vs__arabica_introgressed	chr_D_sg_C_(Scaffold_1;HRSCAF_2)	4c	gene-LOC113740172	LOC113740172	LOC113740172	protein_coding	protein LEO1 homolog
arabica_cultivated__vs__arabica_introgressed::chr_D_sg_C_(Scaffold_1;HRSCAF_2)::sgC	arabica_cultivated__vs__arabica_introgressed	chr_D_sg_C_(Scaffold_1;HRSCAF_2)	4c	gene-LOC113739175	LOC113739175	LOC113739175	protein_coding	uncharacterized LOC113739175
arabica_cultivated__vs__arabica_introgressed::chr_D_sg_C_(Scaffold_1;HRSCAF_2)::sgC	arabica_cultivated__vs__arabica_introgressed	chr_D_sg_C_(Scaffold_1;HRSCAF_2)	4c	gene-LOC140004808	LOC140004808	LOC140004808	protein_coding	uncharacterized LOC140004808
arabica_cultivated__vs__arabica_introgressed::chr_D_sg_C_(Scaffold_1;HRSCAF_2)::sgC	arabica_cultivated__vs__arabica_introgressed	chr_D_sg_C_(Scaffold_1;HRSCAF_2)	4c	gene-LOC140004809	LOC140004809	LOC140004809	protein_coding	uncharacterized LOC140004809
arabica_cultivated__vs__arabica_introgressed::chr_D_sg_C_(Scaffold_1;HRSCAF_2)::sgC	arabica_cultivated__vs__arabica_introgressed	chr_D_sg_C_(Scaffold_1;HRSCAF_2)	4c	gene-LOC113738433	LOC113738433	LOC113738433	lncRNA	uncharacterized LOC113738433
arabica_cultivated__vs__arabica_introgressed::chr_D_sg_C_(Scaffold_1;HRSCAF_2)::sgC	arabica_cultivated__vs__arabica_introgressed	chr_D_sg_C_(Scaffold_1;HRSCAF_2)	4c	gene-LOC140004810	LOC140004810	LOC140004810	protein_coding	uncharacterized LOC140004810
arabica_cultivated__vs__arabica_introgressed::chr_D_sg_C_(Scaffold_1;HRSCAF_2)::sgC	arabica_cultivated__vs__arabica_introgressed	chr_D_sg_C_(Scaffold_1;HRSCAF_2)	4c	gene-LOC140004982	LOC140004982	LOC140004982	lncRNA	uncharacterized LOC140004982
arabica_cultivated__vs__arabica_introgressed::chr_D_sg_C_(Scaffold_1;HRSCAF_2)::sgC	arabica_cultivated__vs__arabica_introgressed	chr_D_sg_C_(Scaffold_1;HRSCAF_2)	4c	gene-LOC113740178	LOC113740178	LOC113740178	protein_coding	uncharacterized LOC113740178
arabica_cultivated__vs__arabica_introgressed::chr_D_sg_C_(Scaffold_1;HRSCAF_2)::sgC	arabica_cultivated__vs__arabica_introgressed	chr_D_sg_C_(Scaffold_1;HRSCAF_2)	4c	gene-LOC113740220	LOC113740220	LOC113740220	protein_coding	uncharacterized LOC113740220
arabica_cultivated__vs__arabica_introgressed::chr_D_sg_C_(Scaffold_1;HRSCAF_2)::sgC	arabica_cultivated__vs__arabica_introgressed	chr_D_sg_C_(Scaffold_1;HRSCAF_2)	4c	gene-LOC113739500	LOC113739500	LOC113739500	lncRNA	uncharacterized LOC113739500
arabica_cultivated__vs__arabica_introgressed::chr_D_sg_C_(Scaffold_1;HRSCAF_2)::sgC	arabica_cultivated__vs__arabica_introgressed	chr_D_sg_C_(Scaffold_1;HRSCAF_2)	4c	gene-LOC113739185	LOC113739185	LOC113739185	protein_coding	UDP-glycosyltransferase 83A1-like
arabica_cultivated__vs__arabica_introgressed::chr_D_sg_C_(Scaffold_1;HRSCAF_2)::sgC	arabica_cultivated__vs__arabica_introgressed	chr_D_sg_C_(Scaffold_1;HRSCAF_2)	4c	gene-LOC140004811	LOC140004811	LOC140004811	protein_coding	uncharacterized LOC140004811
arabica_cultivated__vs__arabica_introgressed::chr_D_sg_C_(Scaffold_1;HRSCAF_2)::sgC	arabica_cultivated__vs__arabica_introgressed	chr_D_sg_C_(Scaffold_1;HRSCAF_2)	4c	gene-LOC113740422	LOC113740422	LOC113740422	lncRNA	uncharacterized LOC113740422
arabica_cultivated__vs__arabica_introgressed::chr_D_sg_C_(Scaffold_1;HRSCAF_2)::sgC	arabica_cultivated__vs__arabica_introgressed	chr_D_sg_C_(Scaffold_1;HRSCAF_2)	4c	gene-TRNAN-AUU	TRNAN-AUU	TRNAN-AUU	tRNA	transfer RNA asparagine (anticodon AUU)
arabica_cultivated__vs__arabica_introgressed::chr_D_sg_C_(Scaffold_1;HRSCAF_2)::sgC	arabica_cultivated__vs__arabica_introgressed	chr_D_sg_C_(Scaffold_1;HRSCAF_2)	4c	gene-LOC140004812	LOC140004812	LOC140004812	protein_coding	secreted RxLR effector protein 161-like
arabica_cultivated__vs__arabica_introgressed::chr_D_sg_C_(Scaffold_1;HRSCAF_2)::sgC	arabica_cultivated__vs__arabica_introgressed	chr_D_sg_C_(Scaffold_1;HRSCAF_2)	4c	gene-LOC140004813	LOC140004813	LOC140004813	protein_coding	uncharacterized mitochondrial protein AtMg00300-like
arabica_cultivated__vs__arabica_introgressed::chr_D_sg_C_(Scaffold_1;HRSCAF_2)::sgC	arabica_cultivated__vs__arabica_introgressed	chr_D_sg_C_(Scaffold_1;HRSCAF_2)	4c	gene-LOC113738704	LOC113738704	LOC113738704	protein_coding	UDP-glycosyltransferase 83A1-like
arabica_cultivated__vs__arabica_introgressed::chr_D_sg_C_(Scaffold_1;HRSCAF_2)::sgC	arabica_cultivated__vs__arabica_introgressed	chr_D_sg_C_(Scaffold_1;HRSCAF_2)	4c	gene-LOC113738814	LOC113738814	LOC113738814	lncRNA	uncharacterized LOC113738814
arabica_cultivated__vs__arabica_introgressed::chr_D_sg_C_(Scaffold_1;HRSCAF_2)::sgC	arabica_cultivated__vs__arabica_introgressed	chr_D_sg_C_(Scaffold_1;HRSCAF_2)	4c	gene-LOC140004814	LOC140004814	LOC140004814	protein_coding	uncharacterized LOC140004814
arabica_cultivated__vs__arabica_introgressed::chr_D_sg_C_(Scaffold_1;HRSCAF_2)::sgC	arabica_cultivated__vs__arabica_introgressed	chr_D_sg_C_(Scaffold_1;HRSCAF_2)	4c	gene-LOC140004983	LOC140004983	LOC140004983	lncRNA	uncharacterized LOC140004983
arabica_cultivated__vs__arabica_introgressed::chr_D_sg_C_(Scaffold_1;HRSCAF_2)::sgC	arabica_cultivated__vs__arabica_introgressed	chr_D_sg_C_(Scaffold_1;HRSCAF_2)	4c	gene-LOC113738478	LOC113738478	LOC113738478	protein_coding	S-type anion channel SLAH3-like	transport_membrane
arabica_cultivated__vs__arabica_introgressed::chr_D_sg_C_(Scaffold_1;HRSCAF_2)::sgC	arabica_cultivated__vs__arabica_introgressed	chr_D_sg_C_(Scaffold_1;HRSCAF_2)	4c	gene-LOC113739188	LOC113739188	LOC113739188	protein_coding	protein SOMBRERO-like
arabica_cultivated__vs__arabica_introgressed::chr_D_sg_C_(Scaffold_1;HRSCAF_2)::sgC	arabica_cultivated__vs__arabica_introgressed	chr_D_sg_C_(Scaffold_1;HRSCAF_2)	4c	gene-LOC140004815	LOC140004815	LOC140004815	protein_coding	uncharacterized LOC140004815
arabica_cultivated__vs__arabica_introgressed::chr_D_sg_C_(Scaffold_1;HRSCAF_2)::sgC	arabica_cultivated__vs__arabica_introgressed	chr_D_sg_C_(Scaffold_1;HRSCAF_2)	4c	gene-LOC140004816	LOC140004816	LOC140004816	protein_coding	uncharacterized LOC140004816
arabica_cultivated__vs__arabica_introgressed::chr_D_sg_C_(Scaffold_1;HRSCAF_2)::sgC	arabica_cultivated__vs__arabica_introgressed	chr_D_sg_C_(Scaffold_1;HRSCAF_2)	4c	gene-LOC113738539	LOC113738539	LOC113738539	protein_coding	small ribosomal subunit protein eS19x
arabica_cultivated__vs__arabica_introgressed::chr_D_sg_C_(Scaffold_1;HRSCAF_2)::sgC	arabica_cultivated__vs__arabica_introgressed	chr_D_sg_C_(Scaffold_1;HRSCAF_2)	4c	gene-LOC113740202	LOC113740202	LOC113740202	protein_coding	diacylglycerol kinase 1-like	kinase_signaling
arabica_cultivated__vs__arabica_introgressed::chr_D_sg_C_(Scaffold_1;HRSCAF_2)::sgC	arabica_cultivated__vs__arabica_introgressed	chr_D_sg_C_(Scaffold_1;HRSCAF_2)	4c	gene-LOC113739461	LOC113739461	LOC113739461	protein_coding	UDP-glucose 6-dehydrogenase 1
arabica_cultivated__vs__arabica_introgressed::chr_D_sg_C_(Scaffold_1;HRSCAF_2)::sgC	arabica_cultivated__vs__arabica_introgressed	chr_D_sg_C_(Scaffold_1;HRSCAF_2)	4c	gene-LOC113739199	LOC113739199	LOC113739199	protein_coding	putative F-box protein At1g67623
arabica_cultivated__vs__arabica_introgressed::chr_D_sg_C_(Scaffold_1;HRSCAF_2)::sgC	arabica_cultivated__vs__arabica_introgressed	chr_D_sg_C_(Scaffold_1;HRSCAF_2)	4c	gene-LOC113739198	LOC113739198	LOC113739198	protein_coding	protein MAIN-LIKE 2-like
arabica_cultivated__vs__arabica_introgressed::chr_D_sg_C_(Scaffold_1;HRSCAF_2)::sgC	arabica_cultivated__vs__arabica_introgressed	chr_D_sg_C_(Scaffold_1;HRSCAF_2)	4c	gene-LOC113739197	LOC113739197	LOC113739197	protein_coding	protein FAR1-RELATED SEQUENCE 5-like
arabica_cultivated__vs__arabica_introgressed::chr_D_sg_C_(Scaffold_1;HRSCAF_2)::sgC	arabica_cultivated__vs__arabica_introgressed	chr_D_sg_C_(Scaffold_1;HRSCAF_2)	4c	gene-LOC113740201	LOC113740201	LOC113740201	protein_coding	pre-mRNA-splicing factor ATP-dependent RNA helicase DEAH1
arabica_cultivated__vs__arabica_introgressed::chr_D_sg_C_(Scaffold_1;HRSCAF_2)::sgC	arabica_cultivated__vs__arabica_introgressed	chr_D_sg_C_(Scaffold_1;HRSCAF_2)	4c	gene-LOC113740437	LOC113740437	LOC113740437	protein_coding	plant intracellular Ras-group-related LRR protein 7	defense_receptor
arabica_cultivated__vs__arabica_introgressed::chr_D_sg_C_(Scaffold_1;HRSCAF_2)::sgC	arabica_cultivated__vs__arabica_introgressed	chr_D_sg_C_(Scaffold_1;HRSCAF_2)	4c	gene-LOC140004818	LOC140004818	LOC140004818	protein_coding	SNF2 domain-containing protein CLASSY 3-like
arabica_cultivated__vs__arabica_introgressed::chr_D_sg_C_(Scaffold_1;HRSCAF_2)::sgC	arabica_cultivated__vs__arabica_introgressed	chr_D_sg_C_(Scaffold_1;HRSCAF_2)	4c	gene-LOC113740212	LOC113740212	LOC113740212	protein_coding	uncharacterized LOC113740212
arabica_cultivated__vs__arabica_introgressed::chr_D_sg_C_(Scaffold_1;HRSCAF_2)::sgC	arabica_cultivated__vs__arabica_introgressed	chr_D_sg_C_(Scaffold_1;HRSCAF_2)	4c	gene-LOC113739452	LOC113739452	LOC113739452	protein_coding	uncharacterized LOC113739452
arabica_cultivated__vs__arabica_introgressed::chr_D_sg_C_(Scaffold_1;HRSCAF_2)::sgC	arabica_cultivated__vs__arabica_introgressed	chr_D_sg_C_(Scaffold_1;HRSCAF_2)	4c	gene-LOC140005358	LOC140005358	LOC140005358	lncRNA	uncharacterized LOC140005358
arabica_cultivated__vs__arabica_introgressed::chr_D_sg_C_(Scaffold_1;HRSCAF_2)::sgC	arabica_cultivated__vs__arabica_introgressed	chr_D_sg_C_(Scaffold_1;HRSCAF_2)	4c	gene-LOC113738579	LOC113738579	LOC113738579	protein_coding	uncharacterized LOC113738579
arabica_cultivated__vs__arabica_introgressed::chr_D_sg_C_(Scaffold_1;HRSCAF_2)::sgC	arabica_cultivated__vs__arabica_introgressed	chr_D_sg_C_(Scaffold_1;HRSCAF_2)	4c	gene-LOC113738545	LOC113738545	LOC113738545	protein_coding	SNAP25 homologous protein SNAP33
arabica_cultivated__vs__arabica_introgressed::chr_D_sg_C_(Scaffold_1;HRSCAF_2)::sgC	arabica_cultivated__vs__arabica_introgressed	chr_D_sg_C_(Scaffold_1;HRSCAF_2)	4c	gene-LOC113738662	LOC113738662	LOC113738662	protein_coding	uncharacterized LOC113738662
arabica_cultivated__vs__arabica_introgressed::chr_D_sg_C_(Scaffold_1;HRSCAF_2)::sgC	arabica_cultivated__vs__arabica_introgressed	chr_D_sg_C_(Scaffold_1;HRSCAF_2)	4c	gene-LOC113738739	LOC113738739	LOC113738739	protein_coding	pentatricopeptide repeat-containing protein At2g40240%2C mitochondrial-like
arabica_cultivated__vs__arabica_introgressed::chr_D_sg_C_(Scaffold_1;HRSCAF_2)::sgC	arabica_cultivated__vs__arabica_introgressed	chr_D_sg_C_(Scaffold_1;HRSCAF_2)	4c	gene-LOC113739192	LOC113739192	LOC113739192	protein_coding	uncharacterized LOC113739192
arabica_cultivated__vs__arabica_introgressed::chr_D_sg_C_(Scaffold_1;HRSCAF_2)::sgC	arabica_cultivated__vs__arabica_introgressed	chr_D_sg_C_(Scaffold_1;HRSCAF_2)	4c	gene-LOC113739529	LOC113739529	LOC113739529	protein_coding	cation/H(+) antiporter 4
arabica_cultivated__vs__arabica_introgressed::chr_D_sg_C_(Scaffold_1;HRSCAF_2)::sgC	arabica_cultivated__vs__arabica_introgressed	chr_D_sg_C_(Scaffold_1;HRSCAF_2)	4c	gene-LOC113740196	LOC113740196	LOC113740196	protein_coding	heparanase-like protein 2
arabica_cultivated__vs__arabica_introgressed::chr_D_sg_C_(Scaffold_1;HRSCAF_2)::sgC	arabica_cultivated__vs__arabica_introgressed	chr_D_sg_C_(Scaffold_1;HRSCAF_2)	4c	gene-LOC140004984	LOC140004984	LOC140004984	lncRNA	uncharacterized LOC140004984
arabica_cultivated__vs__arabica_introgressed::chr_D_sg_C_(Scaffold_1;HRSCAF_2)::sgC	arabica_cultivated__vs__arabica_introgressed	chr_D_sg_C_(Scaffold_1;HRSCAF_2)	4c	gene-LOC113740219	LOC113740219	LOC113740219	lncRNA	uncharacterized LOC113740219
arabica_cultivated__vs__arabica_introgressed::chr_D_sg_C_(Scaffold_1;HRSCAF_2)::sgC	arabica_cultivated__vs__arabica_introgressed	chr_D_sg_C_(Scaffold_1;HRSCAF_2)	4c	gene-LOC113740194	LOC113740194	LOC113740194	protein_coding	uncharacterized LOC113740194
arabica_cultivated__vs__arabica_introgressed::chr_D_sg_C_(Scaffold_1;HRSCAF_2)::sgC	arabica_cultivated__vs__arabica_introgressed	chr_D_sg_C_(Scaffold_1;HRSCAF_2)	4c	gene-LOC140005359	LOC140005359	LOC140005359	lncRNA	uncharacterized LOC140005359
arabica_cultivated__vs__arabica_introgressed::chr_D_sg_C_(Scaffold_1;HRSCAF_2)::sgC	arabica_cultivated__vs__arabica_introgressed	chr_D_sg_C_(Scaffold_1;HRSCAF_2)	4c	gene-LOC113738637	LOC113738637	LOC113738637	protein_coding	uncharacterized LOC113738637
arabica_cultivated__vs__arabica_introgressed::chr_D_sg_C_(Scaffold_1;HRSCAF_2)::sgC	arabica_cultivated__vs__arabica_introgressed	chr_D_sg_C_(Scaffold_1;HRSCAF_2)	4c	gene-LOC140004985	LOC140004985	LOC140004985	lncRNA	uncharacterized LOC140004985
arabica_cultivated__vs__arabica_introgressed::chr_D_sg_C_(Scaffold_1;HRSCAF_2)::sgC	arabica_cultivated__vs__arabica_introgressed	chr_D_sg_C_(Scaffold_1;HRSCAF_2)	4c	gene-LOC140004986	LOC140004986	LOC140004986	lncRNA	uncharacterized LOC140004986
arabica_cultivated__vs__arabica_introgressed::chr_D_sg_C_(Scaffold_1;HRSCAF_2)::sgC	arabica_cultivated__vs__arabica_introgressed	chr_D_sg_C_(Scaffold_1;HRSCAF_2)	4c	gene-LOC140004567	LOC140004567	LOC140004567	protein_coding	uncharacterized LOC140004567
arabica_cultivated__vs__arabica_introgressed::chr_D_sg_C_(Scaffold_1;HRSCAF_2)::sgC	arabica_cultivated__vs__arabica_introgressed	chr_D_sg_C_(Scaffold_1;HRSCAF_2)	4c	gene-LOC140005360	LOC140005360	LOC140005360	protein_coding	uncharacterized LOC140005360
arabica_cultivated__vs__arabica_introgressed::chr_D_sg_C_(Scaffold_1;HRSCAF_2)::sgC	arabica_cultivated__vs__arabica_introgressed	chr_D_sg_C_(Scaffold_1;HRSCAF_2)	4c	gene-LOC113741011	LOC113741011	LOC113741011	protein_coding	uncharacterized mitochondrial protein AtMg00310-like
arabica_cultivated__vs__arabica_introgressed::chr_D_sg_C_(Scaffold_1;HRSCAF_2)::sgC	arabica_cultivated__vs__arabica_introgressed	chr_D_sg_C_(Scaffold_1;HRSCAF_2)	4c	gene-LOC140004820	LOC140004820	LOC140004820	protein_coding	uncharacterized LOC140004820
arabica_cultivated__vs__arabica_introgressed::chr_D_sg_C_(Scaffold_1;HRSCAF_2)::sgC	arabica_cultivated__vs__arabica_introgressed	chr_D_sg_C_(Scaffold_1;HRSCAF_2)	4c	gene-LOC140004821	LOC140004821	LOC140004821	protein_coding	uncharacterized LOC140004821
arabica_cultivated__vs__arabica_introgressed::chr_D_sg_C_(Scaffold_1;HRSCAF_2)::sgC	arabica_cultivated__vs__arabica_introgressed	chr_D_sg_C_(Scaffold_1;HRSCAF_2)	4c	gene-LOC113741810	LOC113741810	LOC113741810	protein_coding	uncharacterized LOC113741810
arabica_cultivated__vs__arabica_introgressed::chr_D_sg_C_(Scaffold_1;HRSCAF_2)::sgC	arabica_cultivated__vs__arabica_introgressed	chr_D_sg_C_(Scaffold_1;HRSCAF_2)	4c	gene-LOC113741919	LOC113741919	LOC113741919	protein_coding	transcription factor PIF7-like	transcriptional_regulation
arabica_cultivated__vs__arabica_introgressed::chr_D_sg_C_(Scaffold_1;HRSCAF_2)::sgC	arabica_cultivated__vs__arabica_introgressed	chr_D_sg_C_(Scaffold_1;HRSCAF_2)	4c	gene-LOC140005361	LOC140005361	LOC140005361	lncRNA	uncharacterized LOC140005361
arabica_cultivated__vs__arabica_introgressed::chr_D_sg_C_(Scaffold_1;HRSCAF_2)::sgC	arabica_cultivated__vs__arabica_introgressed	chr_D_sg_C_(Scaffold_1;HRSCAF_2)	4c	gene-LOC140004987	LOC140004987	LOC140004987	lncRNA	uncharacterized LOC140004987
arabica_cultivated__vs__arabica_introgressed::chr_D_sg_C_(Scaffold_1;HRSCAF_2)::sgC	arabica_cultivated__vs__arabica_introgressed	chr_D_sg_C_(Scaffold_1;HRSCAF_2)	4c	gene-LOC113740496	LOC113740496	LOC113740496	snoRNA	small nucleolar RNA R71
arabica_cultivated__vs__arabica_introgressed::chr_D_sg_C_(Scaffold_1;HRSCAF_2)::sgC	arabica_cultivated__vs__arabica_introgressed	chr_D_sg_C_(Scaffold_1;HRSCAF_2)	4c	gene-LOC113739201	LOC113739201	LOC113739201	protein_coding	protein STRICTOSIDINE SYNTHASE-LIKE 10-like
arabica_cultivated__vs__arabica_introgressed::chr_D_sg_C_(Scaffold_1;HRSCAF_2)::sgC	arabica_cultivated__vs__arabica_introgressed	chr_D_sg_C_(Scaffold_1;HRSCAF_2)	4c	gene-LOC113739202	LOC113739202	LOC113739202	protein_coding	uncharacterized LOC113739202
arabica_cultivated__vs__arabica_introgressed::chr_D_sg_C_(Scaffold_1;HRSCAF_2)::sgC	arabica_cultivated__vs__arabica_introgressed	chr_D_sg_C_(Scaffold_1;HRSCAF_2)	4c	gene-LOC140004822	LOC140004822	LOC140004822	protein_coding	uncharacterized LOC140004822
arabica_cultivated__vs__arabica_introgressed::chr_D_sg_C_(Scaffold_1;HRSCAF_2)::sgC	arabica_cultivated__vs__arabica_introgressed	chr_D_sg_C_(Scaffold_1;HRSCAF_2)	4c	gene-LOC140004823	LOC140004823	LOC140004823	protein_coding	uncharacterized LOC140004823
arabica_cultivated__vs__arabica_introgressed::chr_D_sg_C_(Scaffold_1;HRSCAF_2)::sgC	arabica_cultivated__vs__arabica_introgressed	chr_D_sg_C_(Scaffold_1;HRSCAF_2)	4c	gene-LOC113740206	LOC113740206	LOC113740206	protein_coding	probable splicing factor 3A subunit 1
arabica_cultivated__vs__arabica_introgressed::chr_D_sg_C_(Scaffold_1;HRSCAF_2)::sgC	arabica_cultivated__vs__arabica_introgressed	chr_D_sg_C_(Scaffold_1;HRSCAF_2)	4c	gene-LOC113740209	LOC113740209	LOC113740209	protein_coding	vacuolar-sorting receptor 6-like	defense_receptor
arabica_cultivated__vs__arabica_introgressed::chr_D_sg_C_(Scaffold_1;HRSCAF_2)::sgC	arabica_cultivated__vs__arabica_introgressed	chr_D_sg_C_(Scaffold_1;HRSCAF_2)	4c	gene-LOC140004824	LOC140004824	LOC140004824	protein_coding	uncharacterized LOC140004824
arabica_cultivated__vs__arabica_introgressed::chr_D_sg_C_(Scaffold_1;HRSCAF_2)::sgC	arabica_cultivated__vs__arabica_introgressed	chr_D_sg_C_(Scaffold_1;HRSCAF_2)	4c	gene-LOC140004825	LOC140004825	LOC140004825	protein_coding	uncharacterized LOC140004825
arabica_cultivated__vs__arabica_introgressed::chr_D_sg_C_(Scaffold_1;HRSCAF_2)::sgC	arabica_cultivated__vs__arabica_introgressed	chr_D_sg_C_(Scaffold_1;HRSCAF_2)	4c	gene-LOC113739205	LOC113739205	LOC113739205	protein_coding	uncharacterized LOC113739205
arabica_cultivated__vs__arabica_introgressed::chr_D_sg_C_(Scaffold_1;HRSCAF_2)::sgC	arabica_cultivated__vs__arabica_introgressed	chr_D_sg_C_(Scaffold_1;HRSCAF_2)	4c	gene-LOC113738591	LOC113738591	LOC113738591	lncRNA	uncharacterized LOC113738591
arabica_cultivated__vs__arabica_introgressed::chr_D_sg_C_(Scaffold_1;HRSCAF_2)::sgC	arabica_cultivated__vs__arabica_introgressed	chr_D_sg_C_(Scaffold_1;HRSCAF_2)	4c	gene-LOC113739207	LOC113739207	LOC113739207	protein_coding	uncharacterized LOC113739207
arabica_cultivated__vs__arabica_introgressed::chr_D_sg_C_(Scaffold_1;HRSCAF_2)::sgC	arabica_cultivated__vs__arabica_introgressed	chr_D_sg_C_(Scaffold_1;HRSCAF_2)	4c	gene-LOC113739208	LOC113739208	LOC113739208	protein_coding	uncharacterized LOC113739208
arabica_cultivated__vs__arabica_introgressed::chr_D_sg_C_(Scaffold_1;HRSCAF_2)::sgC	arabica_cultivated__vs__arabica_introgressed	chr_D_sg_C_(Scaffold_1;HRSCAF_2)	4c	gene-LOC113739213	LOC113739213	LOC113739213	protein_coding	uncharacterized LOC113739213
arabica_cultivated__vs__arabica_introgressed::chr_D_sg_C_(Scaffold_1;HRSCAF_2)::sgC	arabica_cultivated__vs__arabica_introgressed	chr_D_sg_C_(Scaffold_1;HRSCAF_2)	4c	gene-LOC113738602	LOC113738602	LOC113738602	protein_coding	sugar transport protein 8-like
arabica_cultivated__vs__arabica_introgressed::chr_D_sg_C_(Scaffold_1;HRSCAF_2)::sgC	arabica_cultivated__vs__arabica_introgressed	chr_D_sg_C_(Scaffold_1;HRSCAF_2)	4c	gene-LOC140004989	LOC140004989	LOC140004989	lncRNA	uncharacterized LOC140004989
arabica_cultivated__vs__arabica_introgressed::chr_D_sg_C_(Scaffold_1;HRSCAF_2)::sgC	arabica_cultivated__vs__arabica_introgressed	chr_D_sg_C_(Scaffold_1;HRSCAF_2)	4c	gene-LOC113739214	LOC113739214	LOC113739214	protein_coding	sugar transport protein 8-like
arabica_cultivated__vs__arabica_introgressed::chr_D_sg_C_(Scaffold_1;HRSCAF_2)::sgC	arabica_cultivated__vs__arabica_introgressed	chr_D_sg_C_(Scaffold_1;HRSCAF_2)	4c	gene-LOC113739215	LOC113739215	LOC113739215	protein_coding	uncharacterized LOC113739215
arabica_cultivated__vs__arabica_introgressed::chr_D_sg_C_(Scaffold_1;HRSCAF_2)::sgC	arabica_cultivated__vs__arabica_introgressed	chr_D_sg_C_(Scaffold_1;HRSCAF_2)	4c	gene-LOC140004826	LOC140004826	LOC140004826	protein_coding	uncharacterized LOC140004826
arabica_cultivated__vs__arabica_introgressed::chr_D_sg_C_(Scaffold_1;HRSCAF_2)::sgC	arabica_cultivated__vs__arabica_introgressed	chr_D_sg_C_(Scaffold_1;HRSCAF_2)	4c	gene-LOC140004991	LOC140004991	LOC140004991	lncRNA	uncharacterized LOC140004991
arabica_cultivated__vs__arabica_introgressed::chr_D_sg_C_(Scaffold_1;HRSCAF_2)::sgC	arabica_cultivated__vs__arabica_introgressed	chr_D_sg_C_(Scaffold_1;HRSCAF_2)	4c	gene-LOC113740492	LOC113740492	LOC113740492	snoRNA	small nucleolar RNA R71
arabica_cultivated__vs__arabica_introgressed::chr_D_sg_C_(Scaffold_1;HRSCAF_2)::sgC	arabica_cultivated__vs__arabica_introgressed	chr_D_sg_C_(Scaffold_1;HRSCAF_2)	4c	gene-LOC140004827	LOC140004827	LOC140004827	protein_coding	uncharacterized LOC140004827
arabica_cultivated__vs__arabica_introgressed::chr_D_sg_C_(Scaffold_1;HRSCAF_2)::sgC	arabica_cultivated__vs__arabica_introgressed	chr_D_sg_C_(Scaffold_1;HRSCAF_2)	4c	gene-LOC140004992	LOC140004992	LOC140004992	lncRNA	uncharacterized LOC140004992
arabica_cultivated__vs__arabica_introgressed::chr_D_sg_C_(Scaffold_1;HRSCAF_2)::sgC	arabica_cultivated__vs__arabica_introgressed	chr_D_sg_C_(Scaffold_1;HRSCAF_2)	4c	gene-LOC113689203	LOC113689203	LOC113689203	protein_coding	uncharacterized LOC113689203
arabica_cultivated__vs__arabica_introgressed::chr_D_sg_C_(Scaffold_1;HRSCAF_2)::sgC	arabica_cultivated__vs__arabica_introgressed	chr_D_sg_C_(Scaffold_1;HRSCAF_2)	4c	gene-LOC140004993	LOC140004993	LOC140004993	lncRNA	uncharacterized LOC140004993
arabica_cultivated__vs__arabica_introgressed::chr_D_sg_C_(Scaffold_1;HRSCAF_2)::sgC	arabica_cultivated__vs__arabica_introgressed	chr_D_sg_C_(Scaffold_1;HRSCAF_2)	4c	gene-LOC113739216	LOC113739216	LOC113739216	protein_coding	uncharacterized LOC113739216
arabica_cultivated__vs__arabica_introgressed::chr_D_sg_C_(Scaffold_1;HRSCAF_2)::sgC	arabica_cultivated__vs__arabica_introgressed	chr_D_sg_C_(Scaffold_1;HRSCAF_2)	4c	gene-LOC113740314	LOC113740314	LOC113740314	protein_coding	uncharacterized LOC113740314
arabica_cultivated__vs__arabica_introgressed::chr_D_sg_C_(Scaffold_1;HRSCAF_2)::sgC	arabica_cultivated__vs__arabica_introgressed	chr_D_sg_C_(Scaffold_1;HRSCAF_2)	4c	gene-LOC113739218	LOC113739218	LOC113739218	protein_coding	germin-like protein 1-1
arabica_cultivated__vs__arabica_introgressed::chr_D_sg_C_(Scaffold_1;HRSCAF_2)::sgC	arabica_cultivated__vs__arabica_introgressed	chr_D_sg_C_(Scaffold_1;HRSCAF_2)	4c	gene-LOC113741039	LOC113741039	LOC113741039	protein_coding	germin-like protein 1-1
arabica_cultivated__vs__arabica_introgressed::chr_D_sg_C_(Scaffold_1;HRSCAF_2)::sgC	arabica_cultivated__vs__arabica_introgressed	chr_D_sg_C_(Scaffold_1;HRSCAF_2)	4c	gene-LOC113739219	LOC113739219	LOC113739219	protein_coding	uncharacterized LOC113739219
arabica_cultivated__vs__arabica_introgressed::chr_D_sg_C_(Scaffold_1;HRSCAF_2)::sgC	arabica_cultivated__vs__arabica_introgressed	chr_D_sg_C_(Scaffold_1;HRSCAF_2)	4c	gene-LOC140004828	LOC140004828	LOC140004828	protein_coding	uncharacterized LOC140004828
arabica_cultivated__vs__arabica_introgressed::chr_D_sg_C_(Scaffold_1;HRSCAF_2)::sgC	arabica_cultivated__vs__arabica_introgressed	chr_D_sg_C_(Scaffold_1;HRSCAF_2)	4c	gene-LOC140004994	LOC140004994	LOC140004994	lncRNA	uncharacterized LOC140004994
arabica_cultivated__vs__arabica_introgressed::chr_D_sg_C_(Scaffold_1;HRSCAF_2)::sgC	arabica_cultivated__vs__arabica_introgressed	chr_D_sg_C_(Scaffold_1;HRSCAF_2)	4c	gene-LOC113739226	LOC113739226	LOC113739226	protein_coding	uncharacterized LOC113739226
arabica_cultivated__vs__arabica_introgressed::chr_D_sg_C_(Scaffold_1;HRSCAF_2)::sgC	arabica_cultivated__vs__arabica_introgressed	chr_D_sg_C_(Scaffold_1;HRSCAF_2)	4c	gene-LOC113739228	LOC113739228	LOC113739228	protein_coding	uncharacterized LOC113739228
arabica_cultivated__vs__arabica_introgressed::chr_D_sg_C_(Scaffold_1;HRSCAF_2)::sgC	arabica_cultivated__vs__arabica_introgressed	chr_D_sg_C_(Scaffold_1;HRSCAF_2)	4c	gene-LOC113740503	LOC113740503	LOC113740503	snoRNA	small nucleolar RNA R71
arabica_cultivated__vs__arabica_introgressed::chr_D_sg_C_(Scaffold_1;HRSCAF_2)::sgC	arabica_cultivated__vs__arabica_introgressed	chr_D_sg_C_(Scaffold_1;HRSCAF_2)	4c	gene-LOC140004995	LOC140004995	LOC140004995	lncRNA	uncharacterized LOC140004995
arabica_cultivated__vs__arabica_introgressed::chr_D_sg_C_(Scaffold_1;HRSCAF_2)::sgC	arabica_cultivated__vs__arabica_introgressed	chr_D_sg_C_(Scaffold_1;HRSCAF_2)	4c	gene-LOC113739229	LOC113739229	LOC113739229	protein_coding	germin-like protein 1-1
arabica_cultivated__vs__arabica_introgressed::chr_D_sg_C_(Scaffold_1;HRSCAF_2)::sgC	arabica_cultivated__vs__arabica_introgressed	chr_D_sg_C_(Scaffold_1;HRSCAF_2)	4c	gene-LOC113739423	LOC113739423	LOC113739423	protein_coding	flavin-containing monooxygenase FMO GS-OX-like 8
arabica_cultivated__vs__arabica_introgressed::chr_D_sg_C_(Scaffold_1;HRSCAF_2)::sgC	arabica_cultivated__vs__arabica_introgressed	chr_D_sg_C_(Scaffold_1;HRSCAF_2)	4c	gene-LOC140005364	LOC140005364	LOC140005364	lncRNA	uncharacterized LOC140005364
arabica_cultivated__vs__arabica_introgressed::chr_D_sg_C_(Scaffold_1;HRSCAF_2)::sgC	arabica_cultivated__vs__arabica_introgressed	chr_D_sg_C_(Scaffold_1;HRSCAF_2)	4c	gene-LOC113740224	LOC113740224	LOC113740224	protein_coding	uncharacterized WD repeat-containing protein C17D11.16-like
arabica_cultivated__vs__arabica_introgressed::chr_D_sg_C_(Scaffold_1;HRSCAF_2)::sgC	arabica_cultivated__vs__arabica_introgressed	chr_D_sg_C_(Scaffold_1;HRSCAF_2)	4c	gene-LOC113738776	LOC113738776	LOC113738776	protein_coding	uncharacterized LOC113738776
arabica_cultivated__vs__arabica_introgressed::chr_D_sg_C_(Scaffold_1;HRSCAF_2)::sgC	arabica_cultivated__vs__arabica_introgressed	chr_D_sg_C_(Scaffold_1;HRSCAF_2)	4c	gene-LOC140005365	LOC140005365	LOC140005365	lncRNA	uncharacterized LOC140005365
arabica_cultivated__vs__arabica_introgressed::chr_D_sg_C_(Scaffold_1;HRSCAF_2)::sgC	arabica_cultivated__vs__arabica_introgressed	chr_D_sg_C_(Scaffold_1;HRSCAF_2)	4c	gene-LOC140004829	LOC140004829	LOC140004829	protein_coding	uncharacterized LOC140004829
arabica_cultivated__vs__arabica_introgressed::chr_D_sg_C_(Scaffold_1;HRSCAF_2)::sgC	arabica_cultivated__vs__arabica_introgressed	chr_D_sg_C_(Scaffold_1;HRSCAF_2)	4c	gene-LOC113740227	LOC113740227	LOC113740227	protein_coding	exosome complex component RRP4 homolog
arabica_cultivated__vs__arabica_introgressed::chr_D_sg_C_(Scaffold_1;HRSCAF_2)::sgC	arabica_cultivated__vs__arabica_introgressed	chr_D_sg_C_(Scaffold_1;HRSCAF_2)	4c	gene-LOC113738426	LOC113738426	LOC113738426	protein_coding	uncharacterized LOC113738426
arabica_cultivated__vs__arabica_introgressed::chr_D_sg_C_(Scaffold_1;HRSCAF_2)::sgC	arabica_cultivated__vs__arabica_introgressed	chr_D_sg_C_(Scaffold_1;HRSCAF_2)	4c	gene-LOC113740485	LOC113740485	LOC113740485	snRNA	U1 spliceosomal RNA
arabica_cultivated__vs__arabica_introgressed::chr_D_sg_C_(Scaffold_1;HRSCAF_2)::sgC	arabica_cultivated__vs__arabica_introgressed	chr_D_sg_C_(Scaffold_1;HRSCAF_2)	4c	gene-LOC140005367	LOC140005367	LOC140005367	lncRNA	uncharacterized LOC140005367
arabica_cultivated__vs__arabica_introgressed::chr_D_sg_C_(Scaffold_1;HRSCAF_2)::sgC	arabica_cultivated__vs__arabica_introgressed	chr_D_sg_C_(Scaffold_1;HRSCAF_2)	4c	gene-LOC113740228	LOC113740228	LOC113740228	protein_coding	large ribosomal subunit protein uL30w
arabica_cultivated__vs__arabica_introgressed::chr_D_sg_C_(Scaffold_1;HRSCAF_2)::sgC	arabica_cultivated__vs__arabica_introgressed	chr_D_sg_C_(Scaffold_1;HRSCAF_2)	4c	gene-LOC113738683	LOC113738683	LOC113738683	protein_coding	uncharacterized LOC113738683
arabica_cultivated__vs__arabica_introgressed::chr_D_sg_C_(Scaffold_1;HRSCAF_2)::sgC	arabica_cultivated__vs__arabica_introgressed	chr_D_sg_C_(Scaffold_1;HRSCAF_2)	4c	gene-LOC113739233	LOC113739233	LOC113739233	protein_coding	uncharacterized LOC113739233
arabica_cultivated__vs__arabica_introgressed::chr_D_sg_C_(Scaffold_1;HRSCAF_2)::sgC	arabica_cultivated__vs__arabica_introgressed	chr_D_sg_C_(Scaffold_1;HRSCAF_2)	4c	gene-LOC113739457	LOC113739457	LOC113739457	protein_coding	probable LRR receptor-like serine/threonine-protein kinase At1g74360	defense_receptor, kinase_signaling
arabica_cultivated__vs__arabica_introgressed::chr_D_sg_C_(Scaffold_1;HRSCAF_2)::sgC	arabica_cultivated__vs__arabica_introgressed	chr_D_sg_C_(Scaffold_1;HRSCAF_2)	4c	gene-LOC113739234	LOC113739234	LOC113739234	protein_coding	WEB family protein At1g12150-like
arabica_cultivated__vs__arabica_introgressed::chr_D_sg_C_(Scaffold_1;HRSCAF_2)::sgC	arabica_cultivated__vs__arabica_introgressed	chr_D_sg_C_(Scaffold_1;HRSCAF_2)	4c	gene-LOC113740230	LOC113740230	LOC113740230	protein_coding	uncharacterized LOC113740230
arabica_cultivated__vs__arabica_introgressed::chr_D_sg_C_(Scaffold_1;HRSCAF_2)::sgC	arabica_cultivated__vs__arabica_introgressed	chr_D_sg_C_(Scaffold_1;HRSCAF_2)	4c	gene-LOC113740231	LOC113740231	LOC113740231	protein_coding	uncharacterized protein At5g01610-like
arabica_cultivated__vs__arabica_introgressed::chr_D_sg_C_(Scaffold_1;HRSCAF_2)::sgC	arabica_cultivated__vs__arabica_introgressed	chr_D_sg_C_(Scaffold_1;HRSCAF_2)	4c	gene-LOC140004830	LOC140004830	LOC140004830	protein_coding	uncharacterized LOC140004830
arabica_cultivated__vs__arabica_introgressed::chr_D_sg_C_(Scaffold_1;HRSCAF_2)::sgC	arabica_cultivated__vs__arabica_introgressed	chr_D_sg_C_(Scaffold_1;HRSCAF_2)	4c	gene-LOC113738812	LOC113738812	LOC113738812	protein_coding	protein SRG1
arabica_cultivated__vs__arabica_introgressed::chr_D_sg_C_(Scaffold_1;HRSCAF_2)::sgC	arabica_cultivated__vs__arabica_introgressed	chr_D_sg_C_(Scaffold_1;HRSCAF_2)	4c	gene-LOC140004831	LOC140004831	LOC140004831	protein_coding	uncharacterized LOC140004831
arabica_cultivated__vs__arabica_introgressed::chr_D_sg_C_(Scaffold_1;HRSCAF_2)::sgC	arabica_cultivated__vs__arabica_introgressed	chr_D_sg_C_(Scaffold_1;HRSCAF_2)	4c	gene-LOC113739236	LOC113739236	LOC113739236	protein_coding	uncharacterized LOC113739236
arabica_cultivated__vs__arabica_introgressed::chr_D_sg_C_(Scaffold_1;HRSCAF_2)::sgC	arabica_cultivated__vs__arabica_introgressed	chr_D_sg_C_(Scaffold_1;HRSCAF_2)	4c	gene-LOC113738369	LOC113738369	LOC113738369	protein_coding	GDSL esterase/lipase At5g22810-like
arabica_cultivated__vs__arabica_introgressed::chr_D_sg_C_(Scaffold_1;HRSCAF_2)::sgC	arabica_cultivated__vs__arabica_introgressed	chr_D_sg_C_(Scaffold_1;HRSCAF_2)	4c	gene-LOC113739237	LOC113739237	LOC113739237	protein_coding	protein FAR1-RELATED SEQUENCE 5-like
arabica_cultivated__vs__arabica_introgressed::chr_D_sg_C_(Scaffold_1;HRSCAF_2)::sgC	arabica_cultivated__vs__arabica_introgressed	chr_D_sg_C_(Scaffold_1;HRSCAF_2)	4c	gene-LOC113740341	LOC113740341	LOC113740341	protein_coding	protein root UVB sensitive 2%2C chloroplastic
arabica_cultivated__vs__arabica_introgressed::chr_D_sg_C_(Scaffold_1;HRSCAF_2)::sgC	arabica_cultivated__vs__arabica_introgressed	chr_D_sg_C_(Scaffold_1;HRSCAF_2)	4c	gene-LOC140004832	LOC140004832	LOC140004832	protein_coding	uncharacterized LOC140004832
arabica_cultivated__vs__arabica_introgressed::chr_D_sg_C_(Scaffold_1;HRSCAF_2)::sgC	arabica_cultivated__vs__arabica_introgressed	chr_D_sg_C_(Scaffold_1;HRSCAF_2)	4c	gene-LOC113738706	LOC113738706	LOC113738706	protein_coding	uncharacterized LOC113738706
arabica_cultivated__vs__arabica_introgressed::chr_D_sg_C_(Scaffold_1;HRSCAF_2)::sgC	arabica_cultivated__vs__arabica_introgressed	chr_D_sg_C_(Scaffold_1;HRSCAF_2)	4c	gene-LOC113740242	LOC113740242	LOC113740242	protein_coding	protein IMPAIRED IN BABA-INDUCED STERILITY 1
arabica_cultivated__vs__arabica_introgressed::chr_D_sg_C_(Scaffold_1;HRSCAF_2)::sgC	arabica_cultivated__vs__arabica_introgressed	chr_D_sg_C_(Scaffold_1;HRSCAF_2)	4c	gene-LOC140005368	LOC140005368	LOC140005368	lncRNA	uncharacterized LOC140005368
arabica_cultivated__vs__arabica_introgressed::chr_D_sg_C_(Scaffold_1;HRSCAF_2)::sgC	arabica_cultivated__vs__arabica_introgressed	chr_D_sg_C_(Scaffold_1;HRSCAF_2)	4c	gene-LOC113739239	LOC113739239	LOC113739239	protein_coding	uncharacterized LOC113739239
arabica_cultivated__vs__arabica_introgressed::chr_D_sg_C_(Scaffold_1;HRSCAF_2)::sgC	arabica_cultivated__vs__arabica_introgressed	chr_D_sg_C_(Scaffold_1;HRSCAF_2)	4c	gene-LOC113739238	LOC113739238	LOC113739238	protein_coding	uncharacterized LOC113739238
arabica_cultivated__vs__arabica_introgressed::chr_D_sg_C_(Scaffold_1;HRSCAF_2)::sgC	arabica_cultivated__vs__arabica_introgressed	chr_D_sg_C_(Scaffold_1;HRSCAF_2)	4c	gene-LOC113740237	LOC113740237	LOC113740237	protein_coding	formin-like protein 20
arabica_cultivated__vs__arabica_introgressed::chr_D_sg_C_(Scaffold_1;HRSCAF_2)::sgC	arabica_cultivated__vs__arabica_introgressed	chr_D_sg_C_(Scaffold_1;HRSCAF_2)	4c	gene-LOC140004833	LOC140004833	LOC140004833	protein_coding	uncharacterized LOC140004833
arabica_cultivated__vs__arabica_introgressed::chr_D_sg_C_(Scaffold_1;HRSCAF_2)::sgC	arabica_cultivated__vs__arabica_introgressed	chr_D_sg_C_(Scaffold_1;HRSCAF_2)	4c	gene-LOC140005369	LOC140005369	LOC140005369	lncRNA	uncharacterized LOC140005369
arabica_cultivated__vs__arabica_introgressed::chr_D_sg_C_(Scaffold_1;HRSCAF_2)::sgC	arabica_cultivated__vs__arabica_introgressed	chr_D_sg_C_(Scaffold_1;HRSCAF_2)	4c	gene-LOC113740255	LOC113740255	LOC113740255	protein_coding	SNF1-related protein kinase catalytic subunit alpha KIN10-like	kinase_signaling
arabica_cultivated__vs__arabica_introgressed::chr_D_sg_C_(Scaffold_1;HRSCAF_2)::sgC	arabica_cultivated__vs__arabica_introgressed	chr_D_sg_C_(Scaffold_1;HRSCAF_2)	4c	gene-LOC113740254	LOC113740254	LOC113740254	protein_coding	probable receptor-like protein kinase At5g61350	defense_receptor, kinase_signaling
arabica_cultivated__vs__arabica_introgressed::chr_D_sg_C_(Scaffold_1;HRSCAF_2)::sgC	arabica_cultivated__vs__arabica_introgressed	chr_D_sg_C_(Scaffold_1;HRSCAF_2)	4c	gene-LOC140005370	LOC140005370	LOC140005370	lncRNA	uncharacterized LOC140005370
arabica_cultivated__vs__arabica_introgressed::chr_D_sg_C_(Scaffold_1;HRSCAF_2)::sgC	arabica_cultivated__vs__arabica_introgressed	chr_D_sg_C_(Scaffold_1;HRSCAF_2)	4c	gene-LOC140004834	LOC140004834	LOC140004834	protein_coding	secreted RxLR effector protein 161-like
arabica_cultivated__vs__arabica_introgressed::chr_D_sg_C_(Scaffold_1;HRSCAF_2)::sgC	arabica_cultivated__vs__arabica_introgressed	chr_D_sg_C_(Scaffold_1;HRSCAF_2)	4c	gene-LOC113738596	LOC113738596	LOC113738596	lncRNA	uncharacterized LOC113738596
arabica_cultivated__vs__arabica_introgressed::chr_D_sg_C_(Scaffold_1;HRSCAF_2)::sgC	arabica_cultivated__vs__arabica_introgressed	chr_D_sg_C_(Scaffold_1;HRSCAF_2)	4c	gene-LOC113739255	LOC113739255	LOC113739255	protein_coding	two-component response regulator ORR22-like
arabica_cultivated__vs__arabica_introgressed::chr_D_sg_C_(Scaffold_1;HRSCAF_2)::sgC	arabica_cultivated__vs__arabica_introgressed	chr_D_sg_C_(Scaffold_1;HRSCAF_2)	4c	gene-LOC140004836	LOC140004836	LOC140004836	protein_coding	uncharacterized LOC140004836
arabica_cultivated__vs__arabica_introgressed::chr_D_sg_C_(Scaffold_1;HRSCAF_2)::sgC	arabica_cultivated__vs__arabica_introgressed	chr_D_sg_C_(Scaffold_1;HRSCAF_2)	4c	gene-LOC140004837	LOC140004837	LOC140004837	protein_coding	uncharacterized LOC140004837
arabica_cultivated__vs__arabica_introgressed::chr_D_sg_C_(Scaffold_1;HRSCAF_2)::sgC	arabica_cultivated__vs__arabica_introgressed	chr_D_sg_C_(Scaffold_1;HRSCAF_2)	4c	gene-LOC113739262	LOC113739262	LOC113739262	protein_coding	cysteine proteinase mucunain-like
arabica_cultivated__vs__arabica_introgressed::chr_D_sg_C_(Scaffold_1;HRSCAF_2)::sgC	arabica_cultivated__vs__arabica_introgressed	chr_D_sg_C_(Scaffold_1;HRSCAF_2)	4c	gene-LOC140004996	LOC140004996	LOC140004996	lncRNA	uncharacterized LOC140004996
arabica_cultivated__vs__arabica_introgressed::chr_D_sg_C_(Scaffold_1;HRSCAF_2)::sgC	arabica_cultivated__vs__arabica_introgressed	chr_D_sg_C_(Scaffold_1;HRSCAF_2)	4c	gene-LOC140004838	LOC140004838	LOC140004838	protein_coding	uncharacterized LOC140004838
arabica_cultivated__vs__arabica_introgressed::chr_D_sg_C_(Scaffold_1;HRSCAF_2)::sgC	arabica_cultivated__vs__arabica_introgressed	chr_D_sg_C_(Scaffold_1;HRSCAF_2)	4c	gene-LOC113739243	LOC113739243	LOC113739243	protein_coding	protein FAR1-RELATED SEQUENCE 5-like
arabica_cultivated__vs__arabica_introgressed::chr_D_sg_C_(Scaffold_1;HRSCAF_2)::sgC	arabica_cultivated__vs__arabica_introgressed	chr_D_sg_C_(Scaffold_1;HRSCAF_2)	4c	gene-LOC113739245	LOC113739245	LOC113739245	protein_coding	protein FAR1-RELATED SEQUENCE 5-like
arabica_cultivated__vs__arabica_introgressed::chr_D_sg_C_(Scaffold_1;HRSCAF_2)::sgC	arabica_cultivated__vs__arabica_introgressed	chr_D_sg_C_(Scaffold_1;HRSCAF_2)	4c	gene-LOC140004997	LOC140004997	LOC140004997	protein_coding	uncharacterized LOC140004997
arabica_cultivated__vs__arabica_introgressed::chr_D_sg_C_(Scaffold_1;HRSCAF_2)::sgC	arabica_cultivated__vs__arabica_introgressed	chr_D_sg_C_(Scaffold_1;HRSCAF_2)	4c	gene-LOC113739246	LOC113739246	LOC113739246	lncRNA	uncharacterized LOC113739246
arabica_cultivated__vs__arabica_introgressed::chr_D_sg_C_(Scaffold_1;HRSCAF_2)::sgC	arabica_cultivated__vs__arabica_introgressed	chr_D_sg_C_(Scaffold_1;HRSCAF_2)	4c	gene-LOC140004998	LOC140004998	LOC140004998	lncRNA	uncharacterized LOC140004998
arabica_cultivated__vs__arabica_introgressed::chr_D_sg_C_(Scaffold_1;HRSCAF_2)::sgC	arabica_cultivated__vs__arabica_introgressed	chr_D_sg_C_(Scaffold_1;HRSCAF_2)	4c	gene-LOC140005371	LOC140005371	LOC140005371	lncRNA	uncharacterized LOC140005371
arabica_cultivated__vs__arabica_introgressed::chr_D_sg_C_(Scaffold_1;HRSCAF_2)::sgC	arabica_cultivated__vs__arabica_introgressed	chr_D_sg_C_(Scaffold_1;HRSCAF_2)	4c	gene-LOC113739248	LOC113739248	LOC113739248	protein_coding	uncharacterized LOC113739248
arabica_cultivated__vs__arabica_introgressed::chr_D_sg_C_(Scaffold_1;HRSCAF_2)::sgC	arabica_cultivated__vs__arabica_introgressed	chr_D_sg_C_(Scaffold_1;HRSCAF_2)	4c	gene-LOC113739256	LOC113739256	LOC113739256	protein_coding	protein ALP1-like
arabica_cultivated__vs__arabica_introgressed::chr_D_sg_C_(Scaffold_1;HRSCAF_2)::sgC	arabica_cultivated__vs__arabica_introgressed	chr_D_sg_C_(Scaffold_1;HRSCAF_2)	4c	gene-LOC140004839	LOC140004839	LOC140004839	protein_coding	two-component response regulator ORR22-like
arabica_cultivated__vs__arabica_introgressed::chr_D_sg_C_(Scaffold_1;HRSCAF_2)::sgC	arabica_cultivated__vs__arabica_introgressed	chr_D_sg_C_(Scaffold_1;HRSCAF_2)	4c	gene-LOC140004840	LOC140004840	LOC140004840	protein_coding	uncharacterized LOC140004840
arabica_cultivated__vs__arabica_introgressed::chr_D_sg_C_(Scaffold_1;HRSCAF_2)::sgC	arabica_cultivated__vs__arabica_introgressed	chr_D_sg_C_(Scaffold_1;HRSCAF_2)	4c	gene-LOC140004841	LOC140004841	LOC140004841	protein_coding	protein FAR1-RELATED SEQUENCE 5-like
arabica_cultivated__vs__arabica_introgressed::chr_D_sg_C_(Scaffold_1;HRSCAF_2)::sgC	arabica_cultivated__vs__arabica_introgressed	chr_D_sg_C_(Scaffold_1;HRSCAF_2)	4c	gene-LOC113739410	LOC113739410	LOC113739410	protein_coding	uncharacterized LOC113739410
arabica_cultivated__vs__arabica_introgressed::chr_D_sg_C_(Scaffold_1;HRSCAF_2)::sgC	arabica_cultivated__vs__arabica_introgressed	chr_D_sg_C_(Scaffold_1;HRSCAF_2)	4c	gene-LOC113740265	LOC113740265	LOC113740265	protein_coding	probable xyloglucan 6-xylosyltransferase 3
arabica_cultivated__vs__arabica_introgressed::chr_D_sg_C_(Scaffold_1;HRSCAF_2)::sgC	arabica_cultivated__vs__arabica_introgressed	chr_D_sg_C_(Scaffold_1;HRSCAF_2)	4c	gene-LOC140005373	LOC140005373	LOC140005373	protein_coding	uncharacterized LOC140005373
arabica_cultivated__vs__arabica_introgressed::chr_D_sg_C_(Scaffold_1;HRSCAF_2)::sgC	arabica_cultivated__vs__arabica_introgressed	chr_D_sg_C_(Scaffold_1;HRSCAF_2)	4c	gene-LOC113740267	LOC113740267	LOC113740267	protein_coding	vesicle transport v-SNARE 11-like
arabica_cultivated__vs__arabica_introgressed::chr_D_sg_C_(Scaffold_1;HRSCAF_2)::sgC	arabica_cultivated__vs__arabica_introgressed	chr_D_sg_C_(Scaffold_1;HRSCAF_2)	4c	gene-LOC113740268	LOC113740268	LOC113740268	protein_coding	two-component response regulator-like APRR1
arabica_cultivated__vs__arabica_introgressed::chr_D_sg_C_(Scaffold_1;HRSCAF_2)::sgC	arabica_cultivated__vs__arabica_introgressed	chr_D_sg_C_(Scaffold_1;HRSCAF_2)	4c	gene-LOC140004842	LOC140004842	LOC140004842	protein_coding	uncharacterized LOC140004842
arabica_cultivated__vs__arabica_introgressed::chr_D_sg_C_(Scaffold_1;HRSCAF_2)::sgC	arabica_cultivated__vs__arabica_introgressed	chr_D_sg_C_(Scaffold_1;HRSCAF_2)	4c	gene-LOC113738676	LOC113738676	LOC113738676	protein_coding	pentatricopeptide repeat-containing protein At1g25360
arabica_cultivated__vs__arabica_introgressed::chr_D_sg_C_(Scaffold_1;HRSCAF_2)::sgC	arabica_cultivated__vs__arabica_introgressed	chr_D_sg_C_(Scaffold_1;HRSCAF_2)	4c	gene-LOC113739432	LOC113739432	LOC113739432	lncRNA	uncharacterized LOC113739432
arabica_cultivated__vs__arabica_introgressed::chr_D_sg_C_(Scaffold_1;HRSCAF_2)::sgC	arabica_cultivated__vs__arabica_introgressed	chr_D_sg_C_(Scaffold_1;HRSCAF_2)	4c	gene-LOC113739271	LOC113739271	LOC113739271	protein_coding	uncharacterized LOC113739271
arabica_cultivated__vs__arabica_introgressed::chr_D_sg_C_(Scaffold_1;HRSCAF_2)::sgC	arabica_cultivated__vs__arabica_introgressed	chr_D_sg_C_(Scaffold_1;HRSCAF_2)	4c	gene-LOC140004999	LOC140004999	LOC140004999	protein_coding	replication protein A 70 kDa DNA-binding subunit D-like
arabica_cultivated__vs__arabica_introgressed::chr_D_sg_C_(Scaffold_1;HRSCAF_2)::sgC	arabica_cultivated__vs__arabica_introgressed	chr_D_sg_C_(Scaffold_1;HRSCAF_2)	4c	gene-LOC113738389	LOC113738389	LOC113738389	protein_coding	protein NEN1
arabica_cultivated__vs__arabica_introgressed::chr_D_sg_C_(Scaffold_1;HRSCAF_2)::sgC	arabica_cultivated__vs__arabica_introgressed	chr_D_sg_C_(Scaffold_1;HRSCAF_2)	4c	gene-LOC113739272	LOC113739272	LOC113739272	protein_coding	pentatricopeptide repeat-containing protein At5g48910
arabica_cultivated__vs__arabica_introgressed::chr_D_sg_C_(Scaffold_1;HRSCAF_2)::sgC	arabica_cultivated__vs__arabica_introgressed	chr_D_sg_C_(Scaffold_1;HRSCAF_2)	4c	gene-LOC113739274	LOC113739274	LOC113739274	protein_coding	uncharacterized LOC113739274
arabica_cultivated__vs__arabica_introgressed::chr_D_sg_C_(Scaffold_1;HRSCAF_2)::sgC	arabica_cultivated__vs__arabica_introgressed	chr_D_sg_C_(Scaffold_1;HRSCAF_2)	4c	gene-LOC113738791	LOC113738791	LOC113738791	protein_coding	putative pentatricopeptide repeat-containing protein At1g74400
arabica_cultivated__vs__arabica_introgressed::chr_D_sg_C_(Scaffold_1;HRSCAF_2)::sgC	arabica_cultivated__vs__arabica_introgressed	chr_D_sg_C_(Scaffold_1;HRSCAF_2)	4c	gene-LOC113738718	LOC113738718	LOC113738718	protein_coding	NEP1-interacting protein-like 2
arabica_cultivated__vs__arabica_introgressed::chr_D_sg_C_(Scaffold_1;HRSCAF_2)::sgC	arabica_cultivated__vs__arabica_introgressed	chr_D_sg_C_(Scaffold_1;HRSCAF_2)	4c	gene-LOC113738465	LOC113738465	LOC113738465	protein_coding	uncharacterized LOC113738465
arabica_cultivated__vs__arabica_introgressed::chr_D_sg_C_(Scaffold_1;HRSCAF_2)::sgC	arabica_cultivated__vs__arabica_introgressed	chr_D_sg_C_(Scaffold_1;HRSCAF_2)	4c	gene-LOC113740272	LOC113740272	LOC113740272	protein_coding	ribulose-phosphate 3-epimerase%2C chloroplastic-like
arabica_cultivated__vs__arabica_introgressed::chr_D_sg_C_(Scaffold_1;HRSCAF_2)::sgC	arabica_cultivated__vs__arabica_introgressed	chr_D_sg_C_(Scaffold_1;HRSCAF_2)	4c	gene-LOC113739275	LOC113739275	LOC113739275	protein_coding	galactoside 2-alpha-L-fucosyltransferase-like
arabica_cultivated__vs__arabica_introgressed::chr_D_sg_C_(Scaffold_1;HRSCAF_2)::sgC	arabica_cultivated__vs__arabica_introgressed	chr_D_sg_C_(Scaffold_1;HRSCAF_2)	4c	gene-LOC113739387	LOC113739387	LOC113739387	protein_coding	galactoside 2-alpha-L-fucosyltransferase
arabica_cultivated__vs__arabica_introgressed::chr_D_sg_C_(Scaffold_1;HRSCAF_2)::sgC	arabica_cultivated__vs__arabica_introgressed	chr_D_sg_C_(Scaffold_1;HRSCAF_2)	4c	gene-LOC113739277	LOC113739277	LOC113739277	protein_coding	galactoside 2-alpha-L-fucosyltransferase-like
arabica_cultivated__vs__arabica_introgressed::chr_D_sg_C_(Scaffold_1;HRSCAF_2)::sgC	arabica_cultivated__vs__arabica_introgressed	chr_D_sg_C_(Scaffold_1;HRSCAF_2)	4c	gene-LOC113739278	LOC113739278	LOC113739278	protein_coding	uncharacterized LOC113739278
arabica_cultivated__vs__arabica_introgressed::chr_D_sg_C_(Scaffold_1;HRSCAF_2)::sgC	arabica_cultivated__vs__arabica_introgressed	chr_D_sg_C_(Scaffold_1;HRSCAF_2)	4c	gene-LOC113739380	LOC113739380	LOC113739380	protein_coding	galactoside 2-alpha-L-fucosyltransferase
arabica_cultivated__vs__arabica_introgressed::chr_D_sg_C_(Scaffold_1;HRSCAF_2)::sgC	arabica_cultivated__vs__arabica_introgressed	chr_D_sg_C_(Scaffold_1;HRSCAF_2)	4c	gene-LOC113740275	LOC113740275	LOC113740275	protein_coding	galactoside 2-alpha-L-fucosyltransferase-like
arabica_cultivated__vs__arabica_introgressed::chr_D_sg_C_(Scaffold_1;HRSCAF_2)::sgC	arabica_cultivated__vs__arabica_introgressed	chr_D_sg_C_(Scaffold_1;HRSCAF_2)	4c	gene-LOC113740276	LOC113740276	LOC113740276	protein_coding	uncharacterized LOC113740276
arabica_cultivated__vs__arabica_introgressed::chr_D_sg_C_(Scaffold_1;HRSCAF_2)::sgC	arabica_cultivated__vs__arabica_introgressed	chr_D_sg_C_(Scaffold_1;HRSCAF_2)	4c	gene-LOC140005000	LOC140005000	LOC140005000	lncRNA	uncharacterized LOC140005000
arabica_cultivated__vs__arabica_introgressed::chr_D_sg_C_(Scaffold_1;HRSCAF_2)::sgC	arabica_cultivated__vs__arabica_introgressed	chr_D_sg_C_(Scaffold_1;HRSCAF_2)	4c	gene-LOC113739421	LOC113739421	LOC113739421	protein_coding	nucleobase-ascorbate transporter 6-like	transport_membrane
arabica_cultivated__vs__arabica_introgressed::chr_D_sg_C_(Scaffold_1;HRSCAF_2)::sgC	arabica_cultivated__vs__arabica_introgressed	chr_D_sg_C_(Scaffold_1;HRSCAF_2)	4c	gene-LOC113740277	LOC113740277	LOC113740277	protein_coding	uncharacterized LOC113740277
arabica_cultivated__vs__arabica_introgressed::chr_D_sg_C_(Scaffold_1;HRSCAF_2)::sgC	arabica_cultivated__vs__arabica_introgressed	chr_D_sg_C_(Scaffold_1;HRSCAF_2)	4c	gene-LOC113739468	LOC113739468	LOC113739468	lncRNA	uncharacterized LOC113739468
arabica_cultivated__vs__arabica_introgressed::chr_D_sg_C_(Scaffold_1;HRSCAF_2)::sgC	arabica_cultivated__vs__arabica_introgressed	chr_D_sg_C_(Scaffold_1;HRSCAF_2)	4c	gene-LOC113740281	LOC113740281	LOC113740281	protein_coding	hexosyltransferase GAUT11
arabica_cultivated__vs__arabica_introgressed::chr_D_sg_C_(Scaffold_1;HRSCAF_2)::sgC	arabica_cultivated__vs__arabica_introgressed	chr_D_sg_C_(Scaffold_1;HRSCAF_2)	4c	gene-LOC140004843	LOC140004843	LOC140004843	protein_coding	uncharacterized LOC140004843
arabica_cultivated__vs__arabica_introgressed::chr_D_sg_C_(Scaffold_1;HRSCAF_2)::sgC	arabica_cultivated__vs__arabica_introgressed	chr_D_sg_C_(Scaffold_1;HRSCAF_2)	4c	gene-LOC113738568	LOC113738568	LOC113738568	protein_coding	adenylate kinase isoenzyme 6 homolog	kinase_signaling
arabica_cultivated__vs__arabica_introgressed::chr_D_sg_C_(Scaffold_1;HRSCAF_2)::sgC	arabica_cultivated__vs__arabica_introgressed	chr_D_sg_C_(Scaffold_1;HRSCAF_2)	4c	gene-LOC140004844	LOC140004844	LOC140004844	protein_coding	uncharacterized LOC140004844
arabica_cultivated__vs__arabica_introgressed::chr_D_sg_C_(Scaffold_1;HRSCAF_2)::sgC	arabica_cultivated__vs__arabica_introgressed	chr_D_sg_C_(Scaffold_1;HRSCAF_2)	4c	gene-LOC113738657	LOC113738657	LOC113738657	protein_coding	NAC domain-containing protein 100-like	transcriptional_regulation
arabica_cultivated__vs__arabica_introgressed::chr_D_sg_C_(Scaffold_1;HRSCAF_2)::sgC	arabica_cultivated__vs__arabica_introgressed	chr_D_sg_C_(Scaffold_1;HRSCAF_2)	4c	gene-LOC113740284	LOC113740284	LOC113740284	protein_coding	uncharacterized LOC113740284
arabica_cultivated__vs__arabica_introgressed::chr_D_sg_C_(Scaffold_1;HRSCAF_2)::sgC	arabica_cultivated__vs__arabica_introgressed	chr_D_sg_C_(Scaffold_1;HRSCAF_2)	4c	gene-LOC113740286	LOC113740286	LOC113740286	protein_coding	2-hydroxy-palmitic acid dioxygenase MPO1
arabica_cultivated__vs__arabica_introgressed::chr_D_sg_C_(Scaffold_1;HRSCAF_2)::sgC	arabica_cultivated__vs__arabica_introgressed	chr_D_sg_C_(Scaffold_1;HRSCAF_2)	4c	gene-TRNAI-AAU-9	TRNAI-AAU	TRNAI-AAU	tRNA	transfer RNA isoleucine (anticodon AAU)
arabica_cultivated__vs__arabica_introgressed::chr_D_sg_C_(Scaffold_1;HRSCAF_2)::sgC	arabica_cultivated__vs__arabica_introgressed	chr_D_sg_C_(Scaffold_1;HRSCAF_2)	4c	gene-LOC113738555	LOC113738555	LOC113738555	protein_coding	photosynthetic NDH subunit of subcomplex B 4%2C chloroplastic
arabica_cultivated__vs__arabica_introgressed::chr_D_sg_C_(Scaffold_1;HRSCAF_2)::sgC	arabica_cultivated__vs__arabica_introgressed	chr_D_sg_C_(Scaffold_1;HRSCAF_2)	4c	gene-LOC113740289	LOC113740289	LOC113740289	protein_coding	thioredoxin-like 1-2%2C chloroplastic
arabica_cultivated__vs__arabica_introgressed::chr_D_sg_C_(Scaffold_1;HRSCAF_2)::sgC	arabica_cultivated__vs__arabica_introgressed	chr_D_sg_C_(Scaffold_1;HRSCAF_2)	4c	gene-LOC140005374	LOC140005374	LOC140005374	lncRNA	uncharacterized LOC140005374
arabica_cultivated__vs__arabica_introgressed::chr_D_sg_C_(Scaffold_1;HRSCAF_2)::sgC	arabica_cultivated__vs__arabica_introgressed	chr_D_sg_C_(Scaffold_1;HRSCAF_2)	4c	gene-LOC113740469	LOC113740469	LOC113740469	snoRNA	small nucleolar RNA snoR122
arabica_cultivated__vs__arabica_introgressed::chr_D_sg_C_(Scaffold_1;HRSCAF_2)::sgC	arabica_cultivated__vs__arabica_introgressed	chr_D_sg_C_(Scaffold_1;HRSCAF_2)	4c	gene-LOC113740523	LOC113740523	LOC113740523	snoRNA	small nucleolar RNA R44/J54/Z268 family
arabica_cultivated__vs__arabica_introgressed::chr_D_sg_C_(Scaffold_1;HRSCAF_2)::sgC	arabica_cultivated__vs__arabica_introgressed	chr_D_sg_C_(Scaffold_1;HRSCAF_2)	4c	gene-LOC113740518	LOC113740518	LOC113740518	snoRNA	small nucleolar RNA Z267
arabica_cultivated__vs__arabica_introgressed::chr_D_sg_C_(Scaffold_1;HRSCAF_2)::sgC	arabica_cultivated__vs__arabica_introgressed	chr_D_sg_C_(Scaffold_1;HRSCAF_2)	4c	gene-LOC113740522	LOC113740522	LOC113740522	snoRNA	small nucleolar RNA R44/J54/Z268 family
arabica_cultivated__vs__arabica_introgressed::chr_D_sg_C_(Scaffold_1;HRSCAF_2)::sgC	arabica_cultivated__vs__arabica_introgressed	chr_D_sg_C_(Scaffold_1;HRSCAF_2)	4c	gene-LOC113740520	LOC113740520	LOC113740520	snoRNA	small nucleolar RNA Z267
arabica_cultivated__vs__arabica_introgressed::chr_D_sg_C_(Scaffold_1;HRSCAF_2)::sgC	arabica_cultivated__vs__arabica_introgressed	chr_D_sg_C_(Scaffold_1;HRSCAF_2)	4c	gene-LOC113738363	LOC113738363	LOC113738363	protein_coding	expansin-A10
arabica_cultivated__vs__arabica_introgressed::chr_D_sg_C_(Scaffold_1;HRSCAF_2)::sgC	arabica_cultivated__vs__arabica_introgressed	chr_D_sg_C_(Scaffold_1;HRSCAF_2)	4c	gene-LOC113739285	LOC113739285	LOC113739285	protein_coding	uncharacterized LOC113739285
arabica_cultivated__vs__arabica_introgressed::chr_D_sg_C_(Scaffold_1;HRSCAF_2)::sgC	arabica_cultivated__vs__arabica_introgressed	chr_D_sg_C_(Scaffold_1;HRSCAF_2)	4c	gene-LOC113739286	LOC113739286	LOC113739286	protein_coding	zinc finger BED domain-containing protein RICESLEEPER 2-like
arabica_cultivated__vs__arabica_introgressed::chr_D_sg_C_(Scaffold_1;HRSCAF_2)::sgC	arabica_cultivated__vs__arabica_introgressed	chr_D_sg_C_(Scaffold_1;HRSCAF_2)	4c	gene-LOC113739288	LOC113739288	LOC113739288	lncRNA	uncharacterized LOC113739288
arabica_cultivated__vs__arabica_introgressed::chr_D_sg_C_(Scaffold_1;HRSCAF_2)::sgC	arabica_cultivated__vs__arabica_introgressed	chr_D_sg_C_(Scaffold_1;HRSCAF_2)	4c	gene-LOC140005001	LOC140005001	LOC140005001	lncRNA	uncharacterized LOC140005001
arabica_cultivated__vs__arabica_introgressed::chr_D_sg_C_(Scaffold_1;HRSCAF_2)::sgC	arabica_cultivated__vs__arabica_introgressed	chr_D_sg_C_(Scaffold_1;HRSCAF_2)	4c	gene-LOC140005002	LOC140005002	LOC140005002	lncRNA	uncharacterized LOC140005002
arabica_cultivated__vs__arabica_introgressed::chr_D_sg_C_(Scaffold_1;HRSCAF_2)::sgC	arabica_cultivated__vs__arabica_introgressed	chr_D_sg_C_(Scaffold_1;HRSCAF_2)	4c	gene-TRNAN-GUU-15	TRNAN-GUU	TRNAN-GUU	tRNA	transfer RNA asparagine (anticodon GUU)
arabica_cultivated__vs__arabica_introgressed::chr_D_sg_C_(Scaffold_1;HRSCAF_2)::sgC	arabica_cultivated__vs__arabica_introgressed	chr_D_sg_C_(Scaffold_1;HRSCAF_2)	4c	gene-LOC113739289	LOC113739289	LOC113739289	protein_coding	(-)-germacrene D synthase-like
arabica_cultivated__vs__arabica_introgressed::chr_D_sg_C_(Scaffold_1;HRSCAF_2)::sgC	arabica_cultivated__vs__arabica_introgressed	chr_D_sg_C_(Scaffold_1;HRSCAF_2)	4c	gene-TRNAN-GUU-16	TRNAN-GUU	TRNAN-GUU	tRNA	transfer RNA asparagine (anticodon GUU)
arabica_cultivated__vs__arabica_introgressed::chr_D_sg_C_(Scaffold_1;HRSCAF_2)::sgC	arabica_cultivated__vs__arabica_introgressed	chr_D_sg_C_(Scaffold_1;HRSCAF_2)	4c	gene-LOC140005003	LOC140005003	LOC140005003	lncRNA	uncharacterized LOC140005003
arabica_cultivated__vs__arabica_introgressed::chr_D_sg_C_(Scaffold_1;HRSCAF_2)::sgC	arabica_cultivated__vs__arabica_introgressed	chr_D_sg_C_(Scaffold_1;HRSCAF_2)	4c	gene-LOC140004847	LOC140004847	LOC140004847	protein_coding	uncharacterized LOC140004847
arabica_cultivated__vs__arabica_introgressed::chr_D_sg_C_(Scaffold_1;HRSCAF_2)::sgC	arabica_cultivated__vs__arabica_introgressed	chr_D_sg_C_(Scaffold_1;HRSCAF_2)	4c	gene-LOC113739291	LOC113739291	LOC113739291	protein_coding	(-)-germacrene D synthase-like
arabica_cultivated__vs__arabica_introgressed::chr_D_sg_C_(Scaffold_1;HRSCAF_2)::sgC	arabica_cultivated__vs__arabica_introgressed	chr_D_sg_C_(Scaffold_1;HRSCAF_2)	4c	gene-LOC113740295	LOC113740295	LOC113740295	protein_coding	chlorophyll a-b binding protein 4%2C chloroplastic
arabica_cultivated__vs__arabica_introgressed::chr_D_sg_C_(Scaffold_1;HRSCAF_2)::sgC	arabica_cultivated__vs__arabica_introgressed	chr_D_sg_C_(Scaffold_1;HRSCAF_2)	4c	gene-LOC113740294	LOC113740294	LOC113740294	protein_coding	agamous-like MADS-box protein AGL65
arabica_cultivated__vs__arabica_introgressed::chr_D_sg_C_(Scaffold_1;HRSCAF_2)::sgC	arabica_cultivated__vs__arabica_introgressed	chr_D_sg_C_(Scaffold_1;HRSCAF_2)	4c	gene-LOC140005375	LOC140005375	LOC140005375	protein_coding	zinc finger BED domain-containing protein RICESLEEPER 3-like
arabica_cultivated__vs__arabica_introgressed::chr_D_sg_C_(Scaffold_1;HRSCAF_2)::sgC	arabica_cultivated__vs__arabica_introgressed	chr_D_sg_C_(Scaffold_1;HRSCAF_2)	4c	gene-LOC113739292	LOC113739292	LOC113739292	lncRNA	uncharacterized LOC113739292
arabica_cultivated__vs__arabica_introgressed::chr_D_sg_C_(Scaffold_1;HRSCAF_2)::sgC	arabica_cultivated__vs__arabica_introgressed	chr_D_sg_C_(Scaffold_1;HRSCAF_2)	4c	gene-LOC113740386	LOC113740386	LOC113740386	protein_coding	thioredoxin-like protein YLS8
arabica_cultivated__vs__arabica_introgressed::chr_D_sg_C_(Scaffold_1;HRSCAF_2)::sgC	arabica_cultivated__vs__arabica_introgressed	chr_D_sg_C_(Scaffold_1;HRSCAF_2)	4c	gene-LOC113740296	LOC113740296	LOC113740296	protein_coding	cytosolic sulfotransferase 7-like
arabica_cultivated__vs__arabica_introgressed::chr_D_sg_C_(Scaffold_1;HRSCAF_2)::sgC	arabica_cultivated__vs__arabica_introgressed	chr_D_sg_C_(Scaffold_1;HRSCAF_2)	4c	gene-LOC140005377	LOC140005377	LOC140005377	lncRNA	uncharacterized LOC140005377
arabica_cultivated__vs__arabica_introgressed::chr_D_sg_C_(Scaffold_1;HRSCAF_2)::sgC	arabica_cultivated__vs__arabica_introgressed	chr_D_sg_C_(Scaffold_1;HRSCAF_2)	4c	gene-LOC113740298	LOC113740298	LOC113740298	protein_coding	cytosolic sulfotransferase 7-like
arabica_cultivated__vs__arabica_introgressed::chr_D_sg_C_(Scaffold_1;HRSCAF_2)::sgC	arabica_cultivated__vs__arabica_introgressed	chr_D_sg_C_(Scaffold_1;HRSCAF_2)	4c	gene-LOC113738487	LOC113738487	LOC113738487	protein_coding	uncharacterized LOC113738487
arabica_cultivated__vs__arabica_introgressed::chr_D_sg_C_(Scaffold_1;HRSCAF_2)::sgC	arabica_cultivated__vs__arabica_introgressed	chr_D_sg_C_(Scaffold_1;HRSCAF_2)	4c	gene-LOC113739294	LOC113739294	LOC113739294	protein_coding	probable calcium-binding protein CML46
arabica_cultivated__vs__arabica_introgressed::chr_D_sg_C_(Scaffold_1;HRSCAF_2)::sgC	arabica_cultivated__vs__arabica_introgressed	chr_D_sg_C_(Scaffold_1;HRSCAF_2)	4c	gene-LOC113739295	LOC113739295	LOC113739295	protein_coding	uncharacterized LOC113739295
arabica_cultivated__vs__arabica_introgressed::chr_D_sg_C_(Scaffold_1;HRSCAF_2)::sgC	arabica_cultivated__vs__arabica_introgressed	chr_D_sg_C_(Scaffold_1;HRSCAF_2)	4c	gene-LOC140004848	LOC140004848	LOC140004848	protein_coding	zinc finger BED domain-containing protein RICESLEEPER 3-like
arabica_cultivated__vs__arabica_introgressed::chr_D_sg_C_(Scaffold_1;HRSCAF_2)::sgC	arabica_cultivated__vs__arabica_introgressed	chr_D_sg_C_(Scaffold_1;HRSCAF_2)	4c	gene-LOC113739296	LOC113739296	LOC113739296	protein_coding	zinc finger BED domain-containing protein RICESLEEPER 2-like
arabica_cultivated__vs__arabica_introgressed::chr_D_sg_C_(Scaffold_1;HRSCAF_2)::sgC	arabica_cultivated__vs__arabica_introgressed	chr_D_sg_C_(Scaffold_1;HRSCAF_2)	4c	gene-LOC113740301	LOC113740301	LOC113740301	protein_coding	cyclic dof factor 3-like
arabica_cultivated__vs__arabica_introgressed::chr_D_sg_C_(Scaffold_1;HRSCAF_2)::sgC	arabica_cultivated__vs__arabica_introgressed	chr_D_sg_C_(Scaffold_1;HRSCAF_2)	4c	gene-LOC140005379	LOC140005379	LOC140005379	lncRNA	uncharacterized LOC140005379
arabica_cultivated__vs__arabica_introgressed::chr_D_sg_C_(Scaffold_1;HRSCAF_2)::sgC	arabica_cultivated__vs__arabica_introgressed	chr_D_sg_C_(Scaffold_1;HRSCAF_2)	4c	gene-LOC113739299	LOC113739299	LOC113739299	protein_coding	(-)-germacrene D synthase-like
arabica_cultivated__vs__arabica_introgressed::chr_D_sg_C_(Scaffold_1;HRSCAF_2)::sgC	arabica_cultivated__vs__arabica_introgressed	chr_D_sg_C_(Scaffold_1;HRSCAF_2)	4c	gene-LOC113742889	LOC113742889	LOC113742889	protein_coding	uncharacterized LOC113742889
arabica_cultivated__vs__arabica_introgressed::chr_D_sg_C_(Scaffold_1;HRSCAF_2)::sgC	arabica_cultivated__vs__arabica_introgressed	chr_D_sg_C_(Scaffold_1;HRSCAF_2)	4c	gene-LOC140005380	LOC140005380	LOC140005380	protein_coding	GDSL esterase/lipase At1g74460-like
arabica_cultivated__vs__arabica_introgressed::chr_D_sg_C_(Scaffold_1;HRSCAF_2)::sgC	arabica_cultivated__vs__arabica_introgressed	chr_D_sg_C_(Scaffold_1;HRSCAF_2)	4c	gene-LOC113742146	LOC113742146	LOC113742146	protein_coding	geranylgeranyl diphosphate reductase%2C chloroplastic
arabica_cultivated__vs__arabica_introgressed::chr_D_sg_C_(Scaffold_1;HRSCAF_2)::sgC	arabica_cultivated__vs__arabica_introgressed	chr_D_sg_C_(Scaffold_1;HRSCAF_2)	4c	gene-LOC140004849	LOC140004849	LOC140004849	protein_coding	uncharacterized LOC140004849
arabica_cultivated__vs__arabica_introgressed::chr_D_sg_C_(Scaffold_1;HRSCAF_2)::sgC	arabica_cultivated__vs__arabica_introgressed	chr_D_sg_C_(Scaffold_1;HRSCAF_2)	4c	gene-LOC113740304	LOC113740304	LOC113740304	protein_coding	malate dehydrogenase%2C chloroplastic-like
arabica_cultivated__vs__arabica_introgressed::chr_D_sg_C_(Scaffold_1;HRSCAF_2)::sgC	arabica_cultivated__vs__arabica_introgressed	chr_D_sg_C_(Scaffold_1;HRSCAF_2)	4c	gene-LOC113742598	LOC113742598	LOC113742598	protein_coding	pentatricopeptide repeat-containing protein At3g47530
arabica_cultivated__vs__arabica_introgressed::chr_D_sg_C_(Scaffold_1;HRSCAF_2)::sgC	arabica_cultivated__vs__arabica_introgressed	chr_D_sg_C_(Scaffold_1;HRSCAF_2)	4c	gene-LOC140005381	LOC140005381	LOC140005381	lncRNA	uncharacterized LOC140005381
arabica_cultivated__vs__arabica_introgressed::chr_D_sg_C_(Scaffold_1;HRSCAF_2)::sgC	arabica_cultivated__vs__arabica_introgressed	chr_D_sg_C_(Scaffold_1;HRSCAF_2)	4c	gene-LOC113741223	LOC113741223	LOC113741223	protein_coding	uncharacterized LOC113741223
arabica_cultivated__vs__arabica_introgressed::chr_D_sg_C_(Scaffold_1;HRSCAF_2)::sgC	arabica_cultivated__vs__arabica_introgressed	chr_D_sg_C_(Scaffold_1;HRSCAF_2)	4c	gene-LOC140005382	LOC140005382	LOC140005382	lncRNA	uncharacterized LOC140005382
arabica_cultivated__vs__arabica_introgressed::chr_D_sg_C_(Scaffold_1;HRSCAF_2)::sgC	arabica_cultivated__vs__arabica_introgressed	chr_D_sg_C_(Scaffold_1;HRSCAF_2)	4c	gene-LOC113740305	LOC113740305	LOC113740305	protein_coding	uncharacterized LOC113740305
arabica_cultivated__vs__arabica_introgressed::chr_D_sg_C_(Scaffold_1;HRSCAF_2)::sgC	arabica_cultivated__vs__arabica_introgressed	chr_D_sg_C_(Scaffold_1;HRSCAF_2)	4c	gene-LOC113740344	LOC113740344	LOC113740344	protein_coding	probable arabinosyltransferase ARAD1
arabica_cultivated__vs__arabica_introgressed::chr_D_sg_C_(Scaffold_1;HRSCAF_2)::sgC	arabica_cultivated__vs__arabica_introgressed	chr_D_sg_C_(Scaffold_1;HRSCAF_2)	4c	gene-LOC113741847	LOC113741847	LOC113741847	protein_coding	gibberellin-regulated protein 6-like
arabica_cultivated__vs__arabica_introgressed::chr_D_sg_C_(Scaffold_1;HRSCAF_2)::sgC	arabica_cultivated__vs__arabica_introgressed	chr_D_sg_C_(Scaffold_1;HRSCAF_2)	4c	gene-LOC113738407	LOC113738407	LOC113738407	lncRNA	uncharacterized LOC113738407
arabica_cultivated__vs__arabica_introgressed::chr_D_sg_C_(Scaffold_1;HRSCAF_2)::sgC	arabica_cultivated__vs__arabica_introgressed	chr_D_sg_C_(Scaffold_1;HRSCAF_2)	4c	gene-LOC113741969	LOC113741969	LOC113741969	lncRNA	uncharacterized LOC113741969
arabica_cultivated__vs__arabica_introgressed::chr_D_sg_C_(Scaffold_1;HRSCAF_2)::sgC	arabica_cultivated__vs__arabica_introgressed	chr_D_sg_C_(Scaffold_1;HRSCAF_2)	4c	gene-LOC140004850	LOC140004850	LOC140004850	protein_coding	transcription factor MYB96-like	transcriptional_regulation
arabica_cultivated__vs__arabica_introgressed::chr_D_sg_C_(Scaffold_1;HRSCAF_2)::sgC	arabica_cultivated__vs__arabica_introgressed	chr_D_sg_C_(Scaffold_1;HRSCAF_2)	4c	gene-LOC113741623	LOC113741623	LOC113741623	protein_coding	pentatricopeptide repeat-containing protein At1g74630-like
arabica_cultivated__vs__arabica_introgressed::chr_D_sg_C_(Scaffold_1;HRSCAF_2)::sgC	arabica_cultivated__vs__arabica_introgressed	chr_D_sg_C_(Scaffold_1;HRSCAF_2)	4c	gene-LOC113742693	LOC113742693	LOC113742693	protein_coding	uncharacterized LOC113742693
arabica_cultivated__vs__arabica_introgressed::chr_D_sg_C_(Scaffold_1;HRSCAF_2)::sgC	arabica_cultivated__vs__arabica_introgressed	chr_D_sg_C_(Scaffold_1;HRSCAF_2)	4c	gene-LOC140004851	LOC140004851	LOC140004851	protein_coding	uncharacterized LOC140004851
arabica_cultivated__vs__arabica_introgressed::chr_D_sg_C_(Scaffold_1;HRSCAF_2)::sgC	arabica_cultivated__vs__arabica_introgressed	chr_D_sg_C_(Scaffold_1;HRSCAF_2)	4c	gene-LOC140005004	LOC140005004	LOC140005004	lncRNA	uncharacterized LOC140005004
arabica_cultivated__vs__arabica_introgressed::chr_D_sg_C_(Scaffold_1;HRSCAF_2)::sgC	arabica_cultivated__vs__arabica_introgressed	chr_D_sg_C_(Scaffold_1;HRSCAF_2)	4c	gene-LOC113739302	LOC113739302	LOC113739302	protein_coding	uncharacterized LOC113739302
arabica_cultivated__vs__arabica_introgressed::chr_D_sg_C_(Scaffold_1;HRSCAF_2)::sgC	arabica_cultivated__vs__arabica_introgressed	chr_D_sg_C_(Scaffold_1;HRSCAF_2)	4c	gene-LOC140004852	LOC140004852	LOC140004852	protein_coding	uncharacterized LOC140004852
arabica_cultivated__vs__arabica_introgressed::chr_D_sg_C_(Scaffold_1;HRSCAF_2)::sgC	arabica_cultivated__vs__arabica_introgressed	chr_D_sg_C_(Scaffold_1;HRSCAF_2)	4c	gene-LOC113738461	LOC113738461	LOC113738461	lncRNA	uncharacterized LOC113738461
arabica_cultivated__vs__arabica_introgressed::chr_D_sg_C_(Scaffold_1;HRSCAF_2)::sgC	arabica_cultivated__vs__arabica_introgressed	chr_D_sg_C_(Scaffold_1;HRSCAF_2)	4c	gene-LOC113739511	LOC113739511	LOC113739511	protein_coding	late embryogenesis abundant protein D-34-like
arabica_cultivated__vs__arabica_introgressed::chr_D_sg_C_(Scaffold_1;HRSCAF_2)::sgC	arabica_cultivated__vs__arabica_introgressed	chr_D_sg_C_(Scaffold_1;HRSCAF_2)	4c	gene-LOC140004853	LOC140004853	LOC140004853	protein_coding	uncharacterized LOC140004853
arabica_cultivated__vs__arabica_introgressed::chr_D_sg_C_(Scaffold_1;HRSCAF_2)::sgC	arabica_cultivated__vs__arabica_introgressed	chr_D_sg_C_(Scaffold_1;HRSCAF_2)	4c	gene-LOC113691236	LOC113691236	LOC113691236	snoRNA	small nucleolar RNA R71
arabica_cultivated__vs__arabica_introgressed::chr_D_sg_C_(Scaffold_1;HRSCAF_2)::sgC	arabica_cultivated__vs__arabica_introgressed	chr_D_sg_C_(Scaffold_1;HRSCAF_2)	4c	gene-LOC113739305	LOC113739305	LOC113739305	protein_coding	uncharacterized LOC113739305
arabica_cultivated__vs__arabica_introgressed::chr_D_sg_C_(Scaffold_1;HRSCAF_2)::sgC	arabica_cultivated__vs__arabica_introgressed	chr_D_sg_C_(Scaffold_1;HRSCAF_2)	4c	gene-LOC113740167	LOC113740167	LOC113740167	protein_coding	glutathione S-transferase U9-like
arabica_cultivated__vs__arabica_introgressed::chr_D_sg_C_(Scaffold_1;HRSCAF_2)::sgC	arabica_cultivated__vs__arabica_introgressed	chr_D_sg_C_(Scaffold_1;HRSCAF_2)	4c	gene-LOC113739306	LOC113739306	LOC113739306	protein_coding	glutathione S-transferase U9-like
arabica_cultivated__vs__arabica_introgressed::chr_D_sg_C_(Scaffold_1;HRSCAF_2)::sgC	arabica_cultivated__vs__arabica_introgressed	chr_D_sg_C_(Scaffold_1;HRSCAF_2)	4c	gene-LOC113739307	LOC113739307	LOC113739307	protein_coding	glutathione S-transferase U9-like
arabica_cultivated__vs__arabica_introgressed::chr_D_sg_C_(Scaffold_1;HRSCAF_2)::sgC	arabica_cultivated__vs__arabica_introgressed	chr_D_sg_C_(Scaffold_1;HRSCAF_2)	4c	gene-LOC113739308	LOC113739308	LOC113739308	protein_coding	glutathione S-transferase U10-like
arabica_cultivated__vs__arabica_introgressed::chr_D_sg_C_(Scaffold_1;HRSCAF_2)::sgC	arabica_cultivated__vs__arabica_introgressed	chr_D_sg_C_(Scaffold_1;HRSCAF_2)	4c	gene-LOC113739309	LOC113739309	LOC113739309	protein_coding	uncharacterized LOC113739309
arabica_cultivated__vs__arabica_introgressed::chr_D_sg_C_(Scaffold_1;HRSCAF_2)::sgC	arabica_cultivated__vs__arabica_introgressed	chr_D_sg_C_(Scaffold_1;HRSCAF_2)	4c	gene-LOC113739310	LOC113739310	LOC113739310	protein_coding	glutathione S-transferase U10-like
arabica_cultivated__vs__arabica_introgressed::chr_D_sg_C_(Scaffold_1;HRSCAF_2)::sgC	arabica_cultivated__vs__arabica_introgressed	chr_D_sg_C_(Scaffold_1;HRSCAF_2)	4c	gene-LOC113739438	LOC113739438	LOC113739438	protein_coding	glutathione S-transferase U9
arabica_cultivated__vs__arabica_introgressed::chr_D_sg_C_(Scaffold_1;HRSCAF_2)::sgC	arabica_cultivated__vs__arabica_introgressed	chr_D_sg_C_(Scaffold_1;HRSCAF_2)	4c	gene-LOC113740190	LOC113740190	LOC113740190	protein_coding	glutathione S-transferase U10-like
arabica_cultivated__vs__arabica_introgressed::chr_D_sg_C_(Scaffold_1;HRSCAF_2)::sgC	arabica_cultivated__vs__arabica_introgressed	chr_D_sg_C_(Scaffold_1;HRSCAF_2)	4c	gene-TRNAL-CAG-2	TRNAL-CAG	TRNAL-CAG	tRNA	transfer RNA leucine (anticodon CAG)
arabica_cultivated__vs__arabica_introgressed::chr_D_sg_C_(Scaffold_1;HRSCAF_2)::sgC	arabica_cultivated__vs__arabica_introgressed	chr_D_sg_C_(Scaffold_1;HRSCAF_2)	4c	gene-LOC113738377	LOC113738377	LOC113738377	protein_coding	pentatricopeptide repeat-containing protein At1g74600%2C chloroplastic
arabica_cultivated__vs__arabica_introgressed::chr_D_sg_C_(Scaffold_1;HRSCAF_2)::sgC	arabica_cultivated__vs__arabica_introgressed	chr_D_sg_C_(Scaffold_1;HRSCAF_2)	4c	gene-LOC113738378	LOC113738378	LOC113738378	protein_coding	uncharacterized LOC113738378
arabica_cultivated__vs__arabica_introgressed::chr_D_sg_C_(Scaffold_1;HRSCAF_2)::sgC	arabica_cultivated__vs__arabica_introgressed	chr_D_sg_C_(Scaffold_1;HRSCAF_2)	4c	gene-LOC113740317	LOC113740317	LOC113740317	protein_coding	uncharacterized LOC113740317
arabica_cultivated__vs__arabica_introgressed::chr_D_sg_C_(Scaffold_1;HRSCAF_2)::sgC	arabica_cultivated__vs__arabica_introgressed	chr_D_sg_C_(Scaffold_1;HRSCAF_2)	4c	gene-LOC113740318	LOC113740318	LOC113740318	protein_coding	uncharacterized LOC113740318
arabica_cultivated__vs__arabica_introgressed::chr_D_sg_C_(Scaffold_1;HRSCAF_2)::sgC	arabica_cultivated__vs__arabica_introgressed	chr_D_sg_C_(Scaffold_1;HRSCAF_2)	4c	gene-LOC113738736	LOC113738736	LOC113738736	protein_coding	probable methyltransferase PMT2
arabica_cultivated__vs__arabica_introgressed::chr_D_sg_C_(Scaffold_1;HRSCAF_2)::sgC	arabica_cultivated__vs__arabica_introgressed	chr_D_sg_C_(Scaffold_1;HRSCAF_2)	4c	gene-LOC113738794	LOC113738794	LOC113738794	protein_coding	protein PHYTOCHROME KINASE SUBSTRATE 3-like	kinase_signaling
arabica_cultivated__vs__arabica_introgressed::chr_D_sg_C_(Scaffold_1;HRSCAF_2)::sgC	arabica_cultivated__vs__arabica_introgressed	chr_D_sg_C_(Scaffold_1;HRSCAF_2)	4c	gene-LOC113740327	LOC113740327	LOC113740327	protein_coding	probable serine/threonine-protein kinase PIX13	kinase_signaling
arabica_cultivated__vs__arabica_introgressed::chr_D_sg_C_(Scaffold_1;HRSCAF_2)::sgC	arabica_cultivated__vs__arabica_introgressed	chr_D_sg_C_(Scaffold_1;HRSCAF_2)	4c	gene-LOC113740324	LOC113740324	LOC113740324	protein_coding	probable LRR receptor-like serine/threonine-protein kinase At2g16250	defense_receptor, kinase_signaling
arabica_cultivated__vs__arabica_introgressed::chr_D_sg_C_(Scaffold_1;HRSCAF_2)::sgC	arabica_cultivated__vs__arabica_introgressed	chr_D_sg_C_(Scaffold_1;HRSCAF_2)	4c	gene-LOC113740330	LOC113740330	LOC113740330	protein_coding	NAP1-related protein 1-like
arabica_cultivated__vs__arabica_introgressed::chr_D_sg_C_(Scaffold_1;HRSCAF_2)::sgC	arabica_cultivated__vs__arabica_introgressed	chr_D_sg_C_(Scaffold_1;HRSCAF_2)	4c	gene-LOC113740328	LOC113740328	LOC113740328	protein_coding	flavonol synthase/flavanone 3-hydroxylase-like
arabica_cultivated__vs__arabica_introgressed::chr_D_sg_C_(Scaffold_1;HRSCAF_2)::sgC	arabica_cultivated__vs__arabica_introgressed	chr_D_sg_C_(Scaffold_1;HRSCAF_2)	4c	gene-LOC113740326	LOC113740326	LOC113740326	protein_coding	flavonol synthase/flavanone 3-hydroxylase-like
arabica_cultivated__vs__arabica_introgressed::chr_D_sg_C_(Scaffold_1;HRSCAF_2)::sgC	arabica_cultivated__vs__arabica_introgressed	chr_D_sg_C_(Scaffold_1;HRSCAF_2)	4c	gene-LOC113740329	LOC113740329	LOC113740329	protein_coding	uncharacterized LOC113740329
arabica_cultivated__vs__arabica_introgressed::chr_D_sg_C_(Scaffold_1;HRSCAF_2)::sgC	arabica_cultivated__vs__arabica_introgressed	chr_D_sg_C_(Scaffold_1;HRSCAF_2)	4c	gene-LOC140005384	LOC140005384	LOC140005384	lncRNA	uncharacterized LOC140005384
arabica_cultivated__vs__arabica_introgressed::chr_D_sg_C_(Scaffold_1;HRSCAF_2)::sgC	arabica_cultivated__vs__arabica_introgressed	chr_D_sg_C_(Scaffold_1;HRSCAF_2)	4c	gene-LOC113740331	LOC113740331	LOC113740331	lncRNA	uncharacterized LOC113740331
arabica_cultivated__vs__arabica_introgressed::chr_D_sg_C_(Scaffold_1;HRSCAF_2)::sgC	arabica_cultivated__vs__arabica_introgressed	chr_D_sg_C_(Scaffold_1;HRSCAF_2)	4c	gene-LOC140005386	LOC140005386	LOC140005386	lncRNA	uncharacterized LOC140005386
arabica_cultivated__vs__arabica_introgressed::chr_D_sg_C_(Scaffold_1;HRSCAF_2)::sgC	arabica_cultivated__vs__arabica_introgressed	chr_D_sg_C_(Scaffold_1;HRSCAF_2)	4c	gene-LOC140005385	LOC140005385	LOC140005385	protein_coding	uncharacterized LOC140005385
arabica_cultivated__vs__arabica_introgressed::chr_D_sg_C_(Scaffold_1;HRSCAF_2)::sgC	arabica_cultivated__vs__arabica_introgressed	chr_D_sg_C_(Scaffold_1;HRSCAF_2)	4c	gene-LOC140005005	LOC140005005	LOC140005005	lncRNA	uncharacterized LOC140005005
arabica_cultivated__vs__arabica_introgressed::chr_D_sg_C_(Scaffold_1;HRSCAF_2)::sgC	arabica_cultivated__vs__arabica_introgressed	chr_D_sg_C_(Scaffold_1;HRSCAF_2)	4c	gene-LOC113739420	LOC113739420	LOC113739420	protein_coding	protein LATERAL BRANCHING OXIDOREDUCTASE 1-like
arabica_cultivated__vs__arabica_introgressed::chr_D_sg_C_(Scaffold_1;HRSCAF_2)::sgC	arabica_cultivated__vs__arabica_introgressed	chr_D_sg_C_(Scaffold_1;HRSCAF_2)	4c	gene-LOC140005006	LOC140005006	LOC140005006	lncRNA	uncharacterized LOC140005006
arabica_cultivated__vs__arabica_introgressed::chr_D_sg_C_(Scaffold_1;HRSCAF_2)::sgC	arabica_cultivated__vs__arabica_introgressed	chr_D_sg_C_(Scaffold_1;HRSCAF_2)	4c	gene-LOC113739311	LOC113739311	LOC113739311	protein_coding	protein FAR1-RELATED SEQUENCE 5-like
arabica_cultivated__vs__arabica_introgressed::chr_D_sg_C_(Scaffold_1;HRSCAF_2)::sgC	arabica_cultivated__vs__arabica_introgressed	chr_D_sg_C_(Scaffold_1;HRSCAF_2)	4c	gene-LOC113740335	LOC113740335	LOC113740335	protein_coding	2-oxoglutarate-dependent dioxygenase 19
arabica_cultivated__vs__arabica_introgressed::chr_D_sg_C_(Scaffold_1;HRSCAF_2)::sgC	arabica_cultivated__vs__arabica_introgressed	chr_D_sg_C_(Scaffold_1;HRSCAF_2)	4c	gene-LOC113740336	LOC113740336	LOC113740336	protein_coding	transcription factor TCP15-like	transcriptional_regulation
arabica_cultivated__vs__arabica_introgressed::chr_D_sg_C_(Scaffold_1;HRSCAF_2)::sgC	arabica_cultivated__vs__arabica_introgressed	chr_D_sg_C_(Scaffold_1;HRSCAF_2)	4c	gene-LOC113740337	LOC113740337	LOC113740337	protein_coding	uncharacterized LOC113740337
arabica_cultivated__vs__arabica_introgressed::chr_D_sg_C_(Scaffold_1;HRSCAF_2)::sgC	arabica_cultivated__vs__arabica_introgressed	chr_D_sg_C_(Scaffold_1;HRSCAF_2)	4c	gene-LOC113740497	LOC113740497	LOC113740497	snRNA	U2 spliceosomal RNA
arabica_cultivated__vs__arabica_introgressed::chr_D_sg_C_(Scaffold_1;HRSCAF_2)::sgC	arabica_cultivated__vs__arabica_introgressed	chr_D_sg_C_(Scaffold_1;HRSCAF_2)	4c	gene-LOC113738471	LOC113738471	LOC113738471	protein_coding	transcription factor bHLH47	transcriptional_regulation
arabica_cultivated__vs__arabica_introgressed::chr_D_sg_C_(Scaffold_1;HRSCAF_2)::sgC	arabica_cultivated__vs__arabica_introgressed	chr_D_sg_C_(Scaffold_1;HRSCAF_2)	4c	gene-LOC113740338	LOC113740338	LOC113740338	protein_coding	HVA22-like protein a
arabica_cultivated__vs__arabica_introgressed::chr_D_sg_C_(Scaffold_1;HRSCAF_2)::sgC	arabica_cultivated__vs__arabica_introgressed	chr_D_sg_C_(Scaffold_1;HRSCAF_2)	4c	gene-TRNAP-AGG-7	TRNAP-AGG	TRNAP-AGG	tRNA	transfer RNA proline (anticodon AGG)
arabica_cultivated__vs__arabica_introgressed::chr_D_sg_C_(Scaffold_1;HRSCAF_2)::sgC	arabica_cultivated__vs__arabica_introgressed	chr_D_sg_C_(Scaffold_1;HRSCAF_2)	4c	gene-LOC113738410	LOC113738410	LOC113738410	protein_coding	PH%2C RCC1 and FYVE domains-containing protein 1-like
arabica_cultivated__vs__arabica_introgressed::chr_D_sg_C_(Scaffold_1;HRSCAF_2)::sgC	arabica_cultivated__vs__arabica_introgressed	chr_D_sg_C_(Scaffold_1;HRSCAF_2)	4c	gene-LOC113739312	LOC113739312	LOC113739312	protein_coding	protein STRICTOSIDINE SYNTHASE-LIKE 10-like
arabica_cultivated__vs__arabica_introgressed::chr_D_sg_C_(Scaffold_1;HRSCAF_2)::sgC	arabica_cultivated__vs__arabica_introgressed	chr_D_sg_C_(Scaffold_1;HRSCAF_2)	4c	gene-LOC113738542	LOC113738542	LOC113738542	protein_coding	microtubule-associated protein RP/EB family member 1B-like
arabica_cultivated__vs__arabica_introgressed::chr_D_sg_C_(Scaffold_1;HRSCAF_2)::sgC	arabica_cultivated__vs__arabica_introgressed	chr_D_sg_C_(Scaffold_1;HRSCAF_2)	4c	gene-LOC113740340	LOC113740340	LOC113740340	protein_coding	small ribosomal subunit protein uS11x-like
arabica_cultivated__vs__arabica_introgressed::chr_D_sg_C_(Scaffold_1;HRSCAF_2)::sgC	arabica_cultivated__vs__arabica_introgressed	chr_D_sg_C_(Scaffold_1;HRSCAF_2)	4c	gene-LOC113740339	LOC113740339	LOC113740339	protein_coding	putative pectinesterase/pectinesterase inhibitor 26
arabica_cultivated__vs__arabica_introgressed::chr_D_sg_C_(Scaffold_1;HRSCAF_2)::sgC	arabica_cultivated__vs__arabica_introgressed	chr_D_sg_C_(Scaffold_1;HRSCAF_2)	4c	gene-LOC140004855	LOC140004855	LOC140004855	protein_coding	uncharacterized LOC140004855
arabica_cultivated__vs__arabica_introgressed::chr_D_sg_C_(Scaffold_1;HRSCAF_2)::sgC	arabica_cultivated__vs__arabica_introgressed	chr_D_sg_C_(Scaffold_1;HRSCAF_2)	4c	gene-LOC113739314	LOC113739314	LOC113739314	protein_coding	uncharacterized LOC113739314
arabica_cultivated__vs__arabica_introgressed::chr_D_sg_C_(Scaffold_1;HRSCAF_2)::sgC	arabica_cultivated__vs__arabica_introgressed	chr_D_sg_C_(Scaffold_1;HRSCAF_2)	4c	gene-LOC113739316	LOC113739316	LOC113739316	protein_coding	germin-like protein 1-1
arabica_cultivated__vs__arabica_introgressed::chr_D_sg_C_(Scaffold_1;HRSCAF_2)::sgC	arabica_cultivated__vs__arabica_introgressed	chr_D_sg_C_(Scaffold_1;HRSCAF_2)	4c	gene-LOC113740480	LOC113740480	LOC113740480	snRNA	U6 spliceosomal RNA
arabica_cultivated__vs__arabica_introgressed::chr_D_sg_C_(Scaffold_1;HRSCAF_2)::sgC	arabica_cultivated__vs__arabica_introgressed	chr_D_sg_C_(Scaffold_1;HRSCAF_2)	4c	gene-LOC113740478	LOC113740478	LOC113740478	snRNA	U6 spliceosomal RNA
arabica_cultivated__vs__arabica_introgressed::chr_D_sg_C_(Scaffold_1;HRSCAF_2)::sgC	arabica_cultivated__vs__arabica_introgressed	chr_D_sg_C_(Scaffold_1;HRSCAF_2)	4c	gene-LOC113740342	LOC113740342	LOC113740342	protein_coding	probable splicing factor 3A subunit 1
arabica_cultivated__vs__arabica_introgressed::chr_D_sg_C_(Scaffold_1;HRSCAF_2)::sgC	arabica_cultivated__vs__arabica_introgressed	chr_D_sg_C_(Scaffold_1;HRSCAF_2)	4c	gene-LOC113740343	LOC113740343	LOC113740343	protein_coding	vacuolar-sorting receptor 6	defense_receptor
arabica_cultivated__vs__arabica_introgressed::chr_D_sg_C_(Scaffold_1;HRSCAF_2)::sgC	arabica_cultivated__vs__arabica_introgressed	chr_D_sg_C_(Scaffold_1;HRSCAF_2)	4c	gene-LOC113740481	LOC113740481	LOC113740481	snRNA	U6 spliceosomal RNA
arabica_cultivated__vs__arabica_introgressed::chr_D_sg_C_(Scaffold_1;HRSCAF_2)::sgC	arabica_cultivated__vs__arabica_introgressed	chr_D_sg_C_(Scaffold_1;HRSCAF_2)	4c	gene-LOC113739317	LOC113739317	LOC113739317	protein_coding	pectinesterase 1-like
arabica_cultivated__vs__arabica_introgressed::chr_D_sg_C_(Scaffold_1;HRSCAF_2)::sgC	arabica_cultivated__vs__arabica_introgressed	chr_D_sg_C_(Scaffold_1;HRSCAF_2)	4c	gene-LOC140005388	LOC140005388	LOC140005388	lncRNA	uncharacterized LOC140005388
arabica_cultivated__vs__arabica_introgressed::chr_D_sg_C_(Scaffold_1;HRSCAF_2)::sgC	arabica_cultivated__vs__arabica_introgressed	chr_D_sg_C_(Scaffold_1;HRSCAF_2)	4c	gene-LOC113739418	LOC113739418	LOC113739418	protein_coding	transcription factor ILI6-like	transcriptional_regulation
arabica_cultivated__vs__arabica_introgressed::chr_D_sg_C_(Scaffold_1;HRSCAF_2)::sgC	arabica_cultivated__vs__arabica_introgressed	chr_D_sg_C_(Scaffold_1;HRSCAF_2)	4c	gene-LOC113740458	LOC113740458	LOC113740458	protein_coding	RINT1-like protein MAG2
arabica_cultivated__vs__arabica_introgressed::chr_D_sg_C_(Scaffold_1;HRSCAF_2)::sgC	arabica_cultivated__vs__arabica_introgressed	chr_D_sg_C_(Scaffold_1;HRSCAF_2)	4c	gene-LOC140004858	LOC140004858	LOC140004858	protein_coding	uncharacterized LOC140004858
arabica_cultivated__vs__arabica_introgressed::chr_D_sg_C_(Scaffold_1;HRSCAF_2)::sgC	arabica_cultivated__vs__arabica_introgressed	chr_D_sg_C_(Scaffold_1;HRSCAF_2)	4c	gene-LOC140005390	LOC140005390	LOC140005390	protein_coding	F-box/kelch-repeat protein SKIP11-like
arabica_cultivated__vs__arabica_introgressed::chr_D_sg_C_(Scaffold_1;HRSCAF_2)::sgC	arabica_cultivated__vs__arabica_introgressed	chr_D_sg_C_(Scaffold_1;HRSCAF_2)	4c	gene-LOC140005391	LOC140005391	LOC140005391	protein_coding	uncharacterized LOC140005391
arabica_cultivated__vs__arabica_introgressed::chr_D_sg_C_(Scaffold_1;HRSCAF_2)::sgC	arabica_cultivated__vs__arabica_introgressed	chr_D_sg_C_(Scaffold_1;HRSCAF_2)	4c	gene-LOC113699805	LOC113699805	LOC113699805	protein_coding	F-box/kelch-repeat protein SKIP11-like
arabica_cultivated__vs__arabica_introgressed::chr_D_sg_C_(Scaffold_1;HRSCAF_2)::sgC	arabica_cultivated__vs__arabica_introgressed	chr_D_sg_C_(Scaffold_1;HRSCAF_2)	4c	gene-LOC113739330	LOC113739330	LOC113739330	protein_coding	tubulin alpha-1 chain-like
arabica_cultivated__vs__arabica_introgressed::chr_D_sg_C_(Scaffold_1;HRSCAF_2)::sgC	arabica_cultivated__vs__arabica_introgressed	chr_D_sg_C_(Scaffold_1;HRSCAF_2)	4c	gene-LOC140004861	LOC140004861	LOC140004861	protein_coding	uncharacterized LOC140004861
arabica_cultivated__vs__arabica_introgressed::chr_D_sg_C_(Scaffold_1;HRSCAF_2)::sgC	arabica_cultivated__vs__arabica_introgressed	chr_D_sg_C_(Scaffold_1;HRSCAF_2)	4c	gene-LOC113739332	LOC113739332	LOC113739332	protein_coding	uncharacterized LOC113739332
arabica_cultivated__vs__arabica_introgressed::chr_D_sg_C_(Scaffold_1;HRSCAF_2)::sgC	arabica_cultivated__vs__arabica_introgressed	chr_D_sg_C_(Scaffold_1;HRSCAF_2)	4c	gene-LOC113738419	LOC113738419	LOC113738419	protein_coding	tubulin alpha chain-like
arabica_cultivated__vs__arabica_introgressed::chr_D_sg_C_(Scaffold_1;HRSCAF_2)::sgC	arabica_cultivated__vs__arabica_introgressed	chr_D_sg_C_(Scaffold_1;HRSCAF_2)	4c	gene-LOC113738714	LOC113738714	LOC113738714	protein_coding	transcription factor PRE3-like	transcriptional_regulation
arabica_cultivated__vs__arabica_introgressed::chr_D_sg_C_(Scaffold_1;HRSCAF_2)::sgC	arabica_cultivated__vs__arabica_introgressed	chr_D_sg_C_(Scaffold_1;HRSCAF_2)	4c	gene-LOC113739333	LOC113739333	LOC113739333	protein_coding	probable serine/threonine-protein kinase PBL18	kinase_signaling
arabica_cultivated__vs__arabica_introgressed::chr_D_sg_C_(Scaffold_1;HRSCAF_2)::sgC	arabica_cultivated__vs__arabica_introgressed	chr_D_sg_C_(Scaffold_1;HRSCAF_2)	4c	gene-LOC113738457	LOC113738457	LOC113738457	protein_coding	vacuolar protein sorting-associated protein 29
arabica_cultivated__vs__arabica_introgressed::chr_D_sg_C_(Scaffold_1;HRSCAF_2)::sgC	arabica_cultivated__vs__arabica_introgressed	chr_D_sg_C_(Scaffold_1;HRSCAF_2)	4c	gene-LOC113739334	LOC113739334	LOC113739334	protein_coding	uncharacterized LOC113739334
arabica_cultivated__vs__arabica_introgressed::chr_D_sg_C_(Scaffold_1;HRSCAF_2)::sgC	arabica_cultivated__vs__arabica_introgressed	chr_D_sg_C_(Scaffold_1;HRSCAF_2)	4c	gene-LOC113738729	LOC113738729	LOC113738729	protein_coding	uncharacterized LOC113738729
arabica_cultivated__vs__arabica_introgressed::chr_D_sg_C_(Scaffold_1;HRSCAF_2)::sgC	arabica_cultivated__vs__arabica_introgressed	chr_D_sg_C_(Scaffold_1;HRSCAF_2)	4c	gene-LOC113738566	LOC113738566	LOC113738566	protein_coding	ABC transporter A family member 7-like	transport_membrane
arabica_cultivated__vs__arabica_introgressed::chr_D_sg_C_(Scaffold_1;HRSCAF_2)::sgC	arabica_cultivated__vs__arabica_introgressed	chr_D_sg_C_(Scaffold_1;HRSCAF_2)	4c	gene-LOC113738827	LOC113738827	LOC113738827	protein_coding	ABC transporter A family member 2	transport_membrane
arabica_cultivated__vs__arabica_introgressed::chr_D_sg_C_(Scaffold_1;HRSCAF_2)::sgC	arabica_cultivated__vs__arabica_introgressed	chr_D_sg_C_(Scaffold_1;HRSCAF_2)	4c	gene-LOC113740346	LOC113740346	LOC113740346	protein_coding	ABC transporter A family member 2	transport_membrane
arabica_cultivated__vs__arabica_introgressed::chr_D_sg_C_(Scaffold_1;HRSCAF_2)::sgC	arabica_cultivated__vs__arabica_introgressed	chr_D_sg_C_(Scaffold_1;HRSCAF_2)	4c	gene-LOC140005393	LOC140005393	LOC140005393	lncRNA	uncharacterized LOC140005393
arabica_cultivated__vs__arabica_introgressed::chr_D_sg_C_(Scaffold_1;HRSCAF_2)::sgC	arabica_cultivated__vs__arabica_introgressed	chr_D_sg_C_(Scaffold_1;HRSCAF_2)	4c	gene-LOC113739335	LOC113739335	LOC113739335	protein_coding	ABC transporter A family member 9-like	transport_membrane
arabica_cultivated__vs__arabica_introgressed::chr_D_sg_C_(Scaffold_1;HRSCAF_2)::sgC	arabica_cultivated__vs__arabica_introgressed	chr_D_sg_C_(Scaffold_1;HRSCAF_2)	4c	gene-LOC140005394	LOC140005394	LOC140005394	protein_coding	ABC transporter A family member 7-like	transport_membrane
arabica_cultivated__vs__arabica_introgressed::chr_D_sg_C_(Scaffold_1;HRSCAF_2)::sgC	arabica_cultivated__vs__arabica_introgressed	chr_D_sg_C_(Scaffold_1;HRSCAF_2)	4c	gene-LOC113741116	LOC113741116	LOC113741116	protein_coding	ABC transporter A family member 9	transport_membrane
arabica_cultivated__vs__arabica_introgressed::chr_D_sg_C_(Scaffold_1;HRSCAF_2)::sgC	arabica_cultivated__vs__arabica_introgressed	chr_D_sg_C_(Scaffold_1;HRSCAF_2)	4c	gene-LOC113729991	LOC113729991	LOC113729991	lncRNA	uncharacterized LOC113729991
arabica_cultivated__vs__arabica_introgressed::chr_D_sg_C_(Scaffold_1;HRSCAF_2)::sgC	arabica_cultivated__vs__arabica_introgressed	chr_D_sg_C_(Scaffold_1;HRSCAF_2)	4c	gene-LOC140005395	LOC140005395	LOC140005395	lncRNA	uncharacterized LOC140005395
arabica_cultivated__vs__arabica_introgressed::chr_D_sg_C_(Scaffold_1;HRSCAF_2)::sgC	arabica_cultivated__vs__arabica_introgressed	chr_D_sg_C_(Scaffold_1;HRSCAF_2)	4c	gene-LOC140005396	LOC140005396	LOC140005396	lncRNA	uncharacterized LOC140005396
arabica_cultivated__vs__arabica_introgressed::chr_D_sg_C_(Scaffold_1;HRSCAF_2)::sgC	arabica_cultivated__vs__arabica_introgressed	chr_D_sg_C_(Scaffold_1;HRSCAF_2)	4c	gene-LOC140005397	LOC140005397	LOC140005397	lncRNA	uncharacterized LOC140005397
arabica_cultivated__vs__arabica_introgressed::chr_D_sg_C_(Scaffold_1;HRSCAF_2)::sgC	arabica_cultivated__vs__arabica_introgressed	chr_D_sg_C_(Scaffold_1;HRSCAF_2)	4c	gene-LOC140005398	LOC140005398	LOC140005398	lncRNA	uncharacterized LOC140005398
arabica_cultivated__vs__arabica_introgressed::chr_D_sg_C_(Scaffold_1;HRSCAF_2)::sgC	arabica_cultivated__vs__arabica_introgressed	chr_D_sg_C_(Scaffold_1;HRSCAF_2)	4c	gene-LOC140004862	LOC140004862	LOC140004862	protein_coding	uncharacterized LOC140004862
arabica_cultivated__vs__arabica_introgressed::chr_D_sg_C_(Scaffold_1;HRSCAF_2)::sgC	arabica_cultivated__vs__arabica_introgressed	chr_D_sg_C_(Scaffold_1;HRSCAF_2)	4c	gene-LOC113740353	LOC113740353	LOC113740353	protein_coding	ubiquitin-conjugating enzyme E2 2
arabica_cultivated__vs__arabica_introgressed::chr_D_sg_C_(Scaffold_1;HRSCAF_2)::sgC	arabica_cultivated__vs__arabica_introgressed	chr_D_sg_C_(Scaffold_1;HRSCAF_2)	4c	gene-LOC113740439	LOC113740439	LOC113740439	protein_coding	uncharacterized LOC113740439
arabica_cultivated__vs__arabica_introgressed::chr_D_sg_C_(Scaffold_1;HRSCAF_2)::sgC	arabica_cultivated__vs__arabica_introgressed	chr_D_sg_C_(Scaffold_1;HRSCAF_2)	4c	gene-LOC113738660	LOC113738660	LOC113738660	protein_coding	WRKY transcription factor 72A-like	transcriptional_regulation
arabica_cultivated__vs__arabica_introgressed::chr_D_sg_C_(Scaffold_1;HRSCAF_2)::sgC	arabica_cultivated__vs__arabica_introgressed	chr_D_sg_C_(Scaffold_1;HRSCAF_2)	4c	gene-LOC113738661	LOC113738661	LOC113738661	protein_coding	WRKY transcription factor 72A-like	transcriptional_regulation
arabica_cultivated__vs__arabica_introgressed::chr_D_sg_C_(Scaffold_1;HRSCAF_2)::sgC	arabica_cultivated__vs__arabica_introgressed	chr_D_sg_C_(Scaffold_1;HRSCAF_2)	4c	gene-LOC113740354	LOC113740354	LOC113740354	protein_coding	probable aldehyde dehydrogenase
arabica_cultivated__vs__arabica_introgressed::chr_D_sg_C_(Scaffold_1;HRSCAF_2)::sgC	arabica_cultivated__vs__arabica_introgressed	chr_D_sg_C_(Scaffold_1;HRSCAF_2)	4c	gene-LOC113740355	LOC113740355	LOC113740355	protein_coding	plant cysteine oxidase 1-like
arabica_cultivated__vs__arabica_introgressed::chr_D_sg_C_(Scaffold_1;HRSCAF_2)::sgC	arabica_cultivated__vs__arabica_introgressed	chr_D_sg_C_(Scaffold_1;HRSCAF_2)	4c	gene-LOC113738514	LOC113738514	LOC113738514	protein_coding	uncharacterized LOC113738514
arabica_cultivated__vs__arabica_introgressed::chr_D_sg_C_(Scaffold_1;HRSCAF_2)::sgC	arabica_cultivated__vs__arabica_introgressed	chr_D_sg_C_(Scaffold_1;HRSCAF_2)	4c	gene-LOC113739339	LOC113739339	LOC113739339	protein_coding	uncharacterized LOC113739339
arabica_cultivated__vs__arabica_introgressed::chr_D_sg_C_(Scaffold_1;HRSCAF_2)::sgC	arabica_cultivated__vs__arabica_introgressed	chr_D_sg_C_(Scaffold_1;HRSCAF_2)	4c	gene-LOC113738627	LOC113738627	LOC113738627	protein_coding	tRNase Z TRZ1
arabica_cultivated__vs__arabica_introgressed::chr_D_sg_C_(Scaffold_1;HRSCAF_2)::sgC	arabica_cultivated__vs__arabica_introgressed	chr_D_sg_C_(Scaffold_1;HRSCAF_2)	4c	gene-LOC113740356	LOC113740356	LOC113740356	protein_coding	uncharacterized LOC113740356
arabica_cultivated__vs__arabica_introgressed::chr_D_sg_C_(Scaffold_1;HRSCAF_2)::sgC	arabica_cultivated__vs__arabica_introgressed	chr_D_sg_C_(Scaffold_1;HRSCAF_2)	4c	gene-LOC113740368	LOC113740368	LOC113740368	protein_coding	isochorismate synthase%2C chloroplastic-like
arabica_cultivated__vs__arabica_introgressed::chr_D_sg_C_(Scaffold_1;HRSCAF_2)::sgC	arabica_cultivated__vs__arabica_introgressed	chr_D_sg_C_(Scaffold_1;HRSCAF_2)	4c	gene-LOC113739344	LOC113739344	LOC113739344	protein_coding	pectate lyase-like
arabica_cultivated__vs__arabica_introgressed::chr_D_sg_C_(Scaffold_1;HRSCAF_2)::sgC	arabica_cultivated__vs__arabica_introgressed	chr_D_sg_C_(Scaffold_1;HRSCAF_2)	4c	gene-LOC113740369	LOC113740369	LOC113740369	protein_coding	uncharacterized LOC113740369
arabica_cultivated__vs__arabica_introgressed::chr_D_sg_C_(Scaffold_1;HRSCAF_2)::sgC	arabica_cultivated__vs__arabica_introgressed	chr_D_sg_C_(Scaffold_1;HRSCAF_2)	4c	gene-LOC113740358	LOC113740358	LOC113740358	protein_coding	protein QUIRKY
arabica_cultivated__vs__arabica_introgressed::chr_D_sg_C_(Scaffold_1;HRSCAF_2)::sgC	arabica_cultivated__vs__arabica_introgressed	chr_D_sg_C_(Scaffold_1;HRSCAF_2)	4c	gene-LOC113739449	LOC113739449	LOC113739449	protein_coding	uncharacterized LOC113739449
arabica_cultivated__vs__arabica_introgressed::chr_D_sg_C_(Scaffold_1;HRSCAF_2)::sgC	arabica_cultivated__vs__arabica_introgressed	chr_D_sg_C_(Scaffold_1;HRSCAF_2)	4c	gene-LOC113740362	LOC113740362	LOC113740362	protein_coding	mitochondrial outer membrane protein porin of 36 kDa-like	transport_membrane
arabica_cultivated__vs__arabica_introgressed::chr_D_sg_C_(Scaffold_1;HRSCAF_2)::sgC	arabica_cultivated__vs__arabica_introgressed	chr_D_sg_C_(Scaffold_1;HRSCAF_2)	4c	gene-LOC113740361	LOC113740361	LOC113740361	protein_coding	hypersensitive-induced reaction 1 protein
arabica_cultivated__vs__arabica_introgressed::chr_D_sg_C_(Scaffold_1;HRSCAF_2)::sgC	arabica_cultivated__vs__arabica_introgressed	chr_D_sg_C_(Scaffold_1;HRSCAF_2)	4c	gene-LOC113739342	LOC113739342	LOC113739342	protein_coding	probable polygalacturonase At1g80170
arabica_cultivated__vs__arabica_introgressed::chr_D_sg_C_(Scaffold_1;HRSCAF_2)::sgC	arabica_cultivated__vs__arabica_introgressed	chr_D_sg_C_(Scaffold_1;HRSCAF_2)	4c	gene-LOC113740420	LOC113740420	LOC113740420	protein_coding	uncharacterized LOC113740420
arabica_cultivated__vs__arabica_introgressed::chr_D_sg_C_(Scaffold_1;HRSCAF_2)::sgC	arabica_cultivated__vs__arabica_introgressed	chr_D_sg_C_(Scaffold_1;HRSCAF_2)	4c	gene-LOC113738504	LOC113738504	LOC113738504	protein_coding	histone-lysine N-methyltransferase%2C H3 lysine-9 specific SUVH5-like
arabica_cultivated__vs__arabica_introgressed::chr_D_sg_C_(Scaffold_1;HRSCAF_2)::sgC	arabica_cultivated__vs__arabica_introgressed	chr_D_sg_C_(Scaffold_1;HRSCAF_2)	4c	gene-LOC140005007	LOC140005007	LOC140005007	protein_coding	uncharacterized LOC140005007
arabica_cultivated__vs__arabica_introgressed::chr_D_sg_C_(Scaffold_1;HRSCAF_2)::sgC	arabica_cultivated__vs__arabica_introgressed	chr_D_sg_C_(Scaffold_1;HRSCAF_2)	4c	gene-LOC140005008	LOC140005008	LOC140005008	protein_coding	uncharacterized LOC140005008
arabica_cultivated__vs__arabica_introgressed::chr_D_sg_C_(Scaffold_1;HRSCAF_2)::sgC	arabica_cultivated__vs__arabica_introgressed	chr_D_sg_C_(Scaffold_1;HRSCAF_2)	4c	gene-TRNAA-AGC-7	TRNAA-AGC	TRNAA-AGC	tRNA	transfer RNA alanine (anticodon AGC)
arabica_cultivated__vs__arabica_introgressed::chr_D_sg_C_(Scaffold_1;HRSCAF_2)::sgC	arabica_cultivated__vs__arabica_introgressed	chr_D_sg_C_(Scaffold_1;HRSCAF_2)	4c	gene-TRNAA-AGC-8	TRNAA-AGC	TRNAA-AGC	tRNA	transfer RNA alanine (anticodon AGC)
arabica_cultivated__vs__arabica_introgressed::chr_D_sg_C_(Scaffold_1;HRSCAF_2)::sgC	arabica_cultivated__vs__arabica_introgressed	chr_D_sg_C_(Scaffold_1;HRSCAF_2)	4c	gene-TRNAA-AGC-9	TRNAA-AGC	TRNAA-AGC	tRNA	transfer RNA alanine (anticodon AGC)
arabica_cultivated__vs__arabica_introgressed::chr_D_sg_C_(Scaffold_1;HRSCAF_2)::sgC	arabica_cultivated__vs__arabica_introgressed	chr_D_sg_C_(Scaffold_1;HRSCAF_2)	4c	gene-TRNAA-AGC-10	TRNAA-AGC	TRNAA-AGC	tRNA	transfer RNA alanine (anticodon AGC)
arabica_cultivated__vs__arabica_introgressed::chr_D_sg_C_(Scaffold_1;HRSCAF_2)::sgC	arabica_cultivated__vs__arabica_introgressed	chr_D_sg_C_(Scaffold_1;HRSCAF_2)	4c	gene-TRNAA-AGC-11	TRNAA-AGC	TRNAA-AGC	tRNA	transfer RNA alanine (anticodon AGC)
arabica_cultivated__vs__arabica_introgressed::chr_D_sg_C_(Scaffold_1;HRSCAF_2)::sgC	arabica_cultivated__vs__arabica_introgressed	chr_D_sg_C_(Scaffold_1;HRSCAF_2)	4c	gene-TRNAA-AGC-12	TRNAA-AGC	TRNAA-AGC	tRNA	transfer RNA alanine (anticodon AGC)
arabica_cultivated__vs__arabica_introgressed::chr_D_sg_C_(Scaffold_1;HRSCAF_2)::sgC	arabica_cultivated__vs__arabica_introgressed	chr_D_sg_C_(Scaffold_1;HRSCAF_2)	4c	gene-TRNAA-AGC-13	TRNAA-AGC	TRNAA-AGC	tRNA	transfer RNA alanine (anticodon AGC)
arabica_cultivated__vs__arabica_introgressed::chr_D_sg_C_(Scaffold_1;HRSCAF_2)::sgC	arabica_cultivated__vs__arabica_introgressed	chr_D_sg_C_(Scaffold_1;HRSCAF_2)	4c	gene-LOC140004181	LOC140004181	LOC140004181	protein_coding	protein NRT1/ PTR FAMILY 4.6-like
arabica_cultivated__vs__arabica_introgressed::chr_D_sg_C_(Scaffold_1;HRSCAF_2)::sgC	arabica_cultivated__vs__arabica_introgressed	chr_D_sg_C_(Scaffold_1;HRSCAF_2)	4c	gene-LOC140005400	LOC140005400	LOC140005400	lncRNA	uncharacterized LOC140005400
arabica_cultivated__vs__arabica_introgressed::chr_D_sg_C_(Scaffold_1;HRSCAF_2)::sgC	arabica_cultivated__vs__arabica_introgressed	chr_D_sg_C_(Scaffold_1;HRSCAF_2)	4c	gene-LOC140004864	LOC140004864	LOC140004864	protein_coding	protein RETICULATA-RELATED 3%2C chloroplastic-like
arabica_cultivated__vs__arabica_introgressed::chr_D_sg_C_(Scaffold_1;HRSCAF_2)::sgC	arabica_cultivated__vs__arabica_introgressed	chr_D_sg_C_(Scaffold_1;HRSCAF_2)	4c	gene-LOC140005401	LOC140005401	LOC140005401	protein_coding	uncharacterized LOC140005401
arabica_cultivated__vs__arabica_introgressed::chr_D_sg_C_(Scaffold_1;HRSCAF_2)::sgC	arabica_cultivated__vs__arabica_introgressed	chr_D_sg_C_(Scaffold_1;HRSCAF_2)	4c	gene-LOC113740373	LOC113740373	LOC113740373	protein_coding	uncharacterized LOC113740373
arabica_cultivated__vs__arabica_introgressed::chr_D_sg_C_(Scaffold_1;HRSCAF_2)::sgC	arabica_cultivated__vs__arabica_introgressed	chr_D_sg_C_(Scaffold_1;HRSCAF_2)	4c	gene-LOC113739347	LOC113739347	LOC113739347	protein_coding	uncharacterized LOC113739347
arabica_cultivated__vs__arabica_introgressed::chr_D_sg_C_(Scaffold_1;HRSCAF_2)::sgC	arabica_cultivated__vs__arabica_introgressed	chr_D_sg_C_(Scaffold_1;HRSCAF_2)	4c	gene-LOC113739526	LOC113739526	LOC113739526	protein_coding	(-)-isopiperitenol/(-)-carveol dehydrogenase%2C mitochondrial-like
arabica_cultivated__vs__arabica_introgressed::chr_D_sg_C_(Scaffold_1;HRSCAF_2)::sgC	arabica_cultivated__vs__arabica_introgressed	chr_D_sg_C_(Scaffold_1;HRSCAF_2)	4c	gene-LOC113738817	LOC113738817	LOC113738817	protein_coding	probable aquaporin NIP5-1
arabica_cultivated__vs__arabica_introgressed::chr_D_sg_C_(Scaffold_1;HRSCAF_2)::sgC	arabica_cultivated__vs__arabica_introgressed	chr_D_sg_C_(Scaffold_1;HRSCAF_2)	4c	gene-LOC113740374	LOC113740374	LOC113740374	protein_coding	(+)-cis%2Ctrans-nepetalactol synthase NEPS2
arabica_cultivated__vs__arabica_introgressed::chr_D_sg_C_(Scaffold_1;HRSCAF_2)::sgC	arabica_cultivated__vs__arabica_introgressed	chr_D_sg_C_(Scaffold_1;HRSCAF_2)	4c	gene-LOC113738567	LOC113738567	LOC113738567	protein_coding	LRR receptor-like serine/threonine-protein kinase FEI 2	defense_receptor, kinase_signaling
arabica_cultivated__vs__arabica_introgressed::chr_D_sg_C_(Scaffold_1;HRSCAF_2)::sgC	arabica_cultivated__vs__arabica_introgressed	chr_D_sg_C_(Scaffold_1;HRSCAF_2)	4c	gene-LOC113740514	LOC113740514	LOC113740514	snoRNA	small nucleolar RNA R71
arabica_cultivated__vs__arabica_introgressed::chr_D_sg_C_(Scaffold_1;HRSCAF_2)::sgC	arabica_cultivated__vs__arabica_introgressed	chr_D_sg_C_(Scaffold_1;HRSCAF_2)	4c	gene-LOC140005009	LOC140005009	LOC140005009	protein_coding	ent-kaurenoic acid oxidase 1-like
arabica_cultivated__vs__arabica_introgressed::chr_D_sg_C_(Scaffold_1;HRSCAF_2)::sgC	arabica_cultivated__vs__arabica_introgressed	chr_D_sg_C_(Scaffold_1;HRSCAF_2)	4c	gene-LOC113739348	LOC113739348	LOC113739348	protein_coding	ent-kaurenoic acid oxidase 1-like
arabica_cultivated__vs__arabica_introgressed::chr_D_sg_C_(Scaffold_1;HRSCAF_2)::sgC	arabica_cultivated__vs__arabica_introgressed	chr_D_sg_C_(Scaffold_1;HRSCAF_2)	4c	gene-LOC113739349	LOC113739349	LOC113739349	protein_coding	protein NRT1/ PTR FAMILY 2.8-like
arabica_cultivated__vs__arabica_introgressed::chr_D_sg_C_(Scaffold_1;HRSCAF_2)::sgC	arabica_cultivated__vs__arabica_introgressed	chr_D_sg_C_(Scaffold_1;HRSCAF_2)	4c	gene-LOC113738384	LOC113738384	LOC113738384	protein_coding	protein NRT1/ PTR FAMILY 2.11-like
arabica_cultivated__vs__arabica_introgressed::chr_D_sg_C_(Scaffold_1;HRSCAF_2)::sgC	arabica_cultivated__vs__arabica_introgressed	chr_D_sg_C_(Scaffold_1;HRSCAF_2)	4c	gene-LOC113738835	LOC113738835	LOC113738835	protein_coding	protein NRT1/ PTR FAMILY 2.11-like
arabica_cultivated__vs__arabica_introgressed::chr_D_sg_C_(Scaffold_1;HRSCAF_2)::sgC	arabica_cultivated__vs__arabica_introgressed	chr_D_sg_C_(Scaffold_1;HRSCAF_2)	4c	gene-LOC140004865	LOC140004865	LOC140004865	protein_coding	uncharacterized LOC140004865
arabica_cultivated__vs__arabica_introgressed::chr_D_sg_C_(Scaffold_1;HRSCAF_2)::sgC	arabica_cultivated__vs__arabica_introgressed	chr_D_sg_C_(Scaffold_1;HRSCAF_2)	4c	gene-LOC113740375	LOC113740375	LOC113740375	protein_coding	protein NRT1/ PTR FAMILY 2.11
arabica_cultivated__vs__arabica_introgressed::chr_D_sg_C_(Scaffold_1;HRSCAF_2)::sgC	arabica_cultivated__vs__arabica_introgressed	chr_D_sg_C_(Scaffold_1;HRSCAF_2)	4c	gene-LOC113738606	LOC113738606	LOC113738606	protein_coding	protein NRT1/ PTR FAMILY 2.11-like
arabica_cultivated__vs__arabica_introgressed::chr_D_sg_C_(Scaffold_1;HRSCAF_2)::sgC	arabica_cultivated__vs__arabica_introgressed	chr_D_sg_C_(Scaffold_1;HRSCAF_2)	4c	gene-LOC140005011	LOC140005011	LOC140005011	lncRNA	uncharacterized LOC140005011
arabica_cultivated__vs__arabica_introgressed::chr_D_sg_C_(Scaffold_1;HRSCAF_2)::sgC	arabica_cultivated__vs__arabica_introgressed	chr_D_sg_C_(Scaffold_1;HRSCAF_2)	4c	gene-LOC113739486	LOC113739486	LOC113739486	protein_coding	protein NRT1/ PTR FAMILY 2.10
arabica_cultivated__vs__arabica_introgressed::chr_D_sg_C_(Scaffold_1;HRSCAF_2)::sgC	arabica_cultivated__vs__arabica_introgressed	chr_D_sg_C_(Scaffold_1;HRSCAF_2)	4c	gene-LOC113739476	LOC113739476	LOC113739476	protein_coding	protein NRT1/ PTR FAMILY 2.11
arabica_cultivated__vs__arabica_introgressed::chr_D_sg_C_(Scaffold_1;HRSCAF_2)::sgC	arabica_cultivated__vs__arabica_introgressed	chr_D_sg_C_(Scaffold_1;HRSCAF_2)	4c	gene-LOC113740378	LOC113740378	LOC113740378	protein_coding	protein NRT1/ PTR FAMILY 2.11-like
arabica_cultivated__vs__arabica_introgressed::chr_D_sg_C_(Scaffold_1;HRSCAF_2)::sgC	arabica_cultivated__vs__arabica_introgressed	chr_D_sg_C_(Scaffold_1;HRSCAF_2)	4c	gene-LOC113740379	LOC113740379	LOC113740379	protein_coding	plasma membrane ATPase 1	transport_membrane
arabica_cultivated__vs__arabica_introgressed::chr_D_sg_C_(Scaffold_1;HRSCAF_2)::sgC	arabica_cultivated__vs__arabica_introgressed	chr_D_sg_C_(Scaffold_1;HRSCAF_2)	4c	gene-LOC113738474	LOC113738474	LOC113738474	lncRNA	uncharacterized LOC113738474
arabica_cultivated__vs__arabica_introgressed::chr_D_sg_C_(Scaffold_1;HRSCAF_2)::sgC	arabica_cultivated__vs__arabica_introgressed	chr_D_sg_C_(Scaffold_1;HRSCAF_2)	4c	gene-LOC113738473	LOC113738473	LOC113738473	protein_coding	uncharacterized LOC113738473
arabica_cultivated__vs__arabica_introgressed::chr_D_sg_C_(Scaffold_1;HRSCAF_2)::sgC	arabica_cultivated__vs__arabica_introgressed	chr_D_sg_C_(Scaffold_1;HRSCAF_2)	4c	gene-LOC113739350	LOC113739350	LOC113739350	protein_coding	LOB domain-containing protein 27-like
arabica_cultivated__vs__arabica_introgressed::chr_D_sg_C_(Scaffold_1;HRSCAF_2)::sgC	arabica_cultivated__vs__arabica_introgressed	chr_D_sg_C_(Scaffold_1;HRSCAF_2)	4c	gene-LOC113740380	LOC113740380	LOC113740380	protein_coding	ABC transporter C family member 3-like	transport_membrane
arabica_cultivated__vs__arabica_introgressed::chr_D_sg_C_(Scaffold_1;HRSCAF_2)::sgC	arabica_cultivated__vs__arabica_introgressed	chr_D_sg_C_(Scaffold_1;HRSCAF_2)	4c	gene-LOC113740381	LOC113740381	LOC113740381	protein_coding	cytochrome c1-2%2C heme protein%2C mitochondrial
arabica_cultivated__vs__arabica_introgressed::chr_D_sg_C_(Scaffold_1;HRSCAF_2)::sgC	arabica_cultivated__vs__arabica_introgressed	chr_D_sg_C_(Scaffold_1;HRSCAF_2)	4c	gene-LOC113740382	LOC113740382	LOC113740382	protein_coding	calcium-dependent protein kinase 10	kinase_signaling
arabica_cultivated__vs__arabica_introgressed::chr_D_sg_C_(Scaffold_1;HRSCAF_2)::sgC	arabica_cultivated__vs__arabica_introgressed	chr_D_sg_C_(Scaffold_1;HRSCAF_2)	4c	gene-LOC140005403	LOC140005403	LOC140005403	lncRNA	uncharacterized LOC140005403
arabica_cultivated__vs__arabica_introgressed::chr_D_sg_C_(Scaffold_1;HRSCAF_2)::sgC	arabica_cultivated__vs__arabica_introgressed	chr_D_sg_C_(Scaffold_1;HRSCAF_2)	4c	gene-LOC113740383	LOC113740383	LOC113740383	protein_coding	pentatricopeptide repeat-containing protein At1g74750-like
arabica_cultivated__vs__arabica_introgressed::chr_D_sg_C_(Scaffold_1;HRSCAF_2)::sgC	arabica_cultivated__vs__arabica_introgressed	chr_D_sg_C_(Scaffold_1;HRSCAF_2)	4c	gene-LOC113740384	LOC113740384	LOC113740384	protein_coding	uncharacterized LOC113740384
arabica_cultivated__vs__arabica_introgressed::chr_D_sg_C_(Scaffold_1;HRSCAF_2)::sgC	arabica_cultivated__vs__arabica_introgressed	chr_D_sg_C_(Scaffold_1;HRSCAF_2)	4c	gene-LOC113739351	LOC113739351	LOC113739351	protein_coding	mediator-associated protein 2-like
arabica_cultivated__vs__arabica_introgressed::chr_D_sg_C_(Scaffold_1;HRSCAF_2)::sgC	arabica_cultivated__vs__arabica_introgressed	chr_D_sg_C_(Scaffold_1;HRSCAF_2)	4c	gene-LOC113740385	LOC113740385	LOC113740385	protein_coding	uncharacterized LOC113740385
arabica_cultivated__vs__arabica_introgressed::chr_D_sg_C_(Scaffold_1;HRSCAF_2)::sgE	arabica_cultivated__vs__arabica_introgressed	chr_D_sg_E_(Scaffold_2;HRSCAF_3)	4e	gene-LOC113742985	LOC113742985	LOC113742985	protein_coding	probable serine/threonine-protein kinase WNK3	kinase_signaling
arabica_cultivated__vs__arabica_introgressed::chr_D_sg_C_(Scaffold_1;HRSCAF_2)::sgE	arabica_cultivated__vs__arabica_introgressed	chr_D_sg_E_(Scaffold_2;HRSCAF_3)	4e	gene-LOC113742241	LOC113742241	LOC113742241	protein_coding	elongation factor Tu%2C chloroplastic
arabica_cultivated__vs__arabica_introgressed::chr_D_sg_C_(Scaffold_1;HRSCAF_2)::sgE	arabica_cultivated__vs__arabica_introgressed	chr_D_sg_E_(Scaffold_2;HRSCAF_3)	4e	gene-LOC113741474	LOC113741474	LOC113741474	protein_coding	uncharacterized LOC113741474
arabica_cultivated__vs__arabica_introgressed::chr_D_sg_C_(Scaffold_1;HRSCAF_2)::sgE	arabica_cultivated__vs__arabica_introgressed	chr_D_sg_E_(Scaffold_2;HRSCAF_3)	4e	gene-LOC140005456	LOC140005456	LOC140005456	protein_coding	uncharacterized LOC140005456
arabica_cultivated__vs__arabica_introgressed::chr_D_sg_C_(Scaffold_1;HRSCAF_2)::sgE	arabica_cultivated__vs__arabica_introgressed	chr_D_sg_E_(Scaffold_2;HRSCAF_3)	4e	gene-LOC113741620	LOC113741620	LOC113741620	lncRNA	uncharacterized LOC113741620
arabica_cultivated__vs__arabica_introgressed::chr_D_sg_C_(Scaffold_1;HRSCAF_2)::sgE	arabica_cultivated__vs__arabica_introgressed	chr_D_sg_E_(Scaffold_2;HRSCAF_3)	4e	gene-LOC140006032	LOC140006032	LOC140006032	lncRNA	uncharacterized LOC140006032
arabica_cultivated__vs__arabica_introgressed::chr_D_sg_C_(Scaffold_1;HRSCAF_2)::sgE	arabica_cultivated__vs__arabica_introgressed	chr_D_sg_E_(Scaffold_2;HRSCAF_3)	4e	gene-LOC113742709	LOC113742709	LOC113742709	protein_coding	protein DEHYDRATION-INDUCED 19 homolog 5-like
arabica_cultivated__vs__arabica_introgressed::chr_D_sg_C_(Scaffold_1;HRSCAF_2)::sgE	arabica_cultivated__vs__arabica_introgressed	chr_D_sg_E_(Scaffold_2;HRSCAF_3)	4e	gene-LOC113740729	LOC113740729	LOC113740729	protein_coding	pentatricopeptide repeat-containing protein At3g48250%2C chloroplastic-like
arabica_cultivated__vs__arabica_introgressed::chr_D_sg_C_(Scaffold_1;HRSCAF_2)::sgE	arabica_cultivated__vs__arabica_introgressed	chr_D_sg_E_(Scaffold_2;HRSCAF_3)	4e	gene-LOC113742246	LOC113742246	LOC113742246	protein_coding	pentatricopeptide repeat-containing protein At3g48250%2C chloroplastic-like
arabica_cultivated__vs__arabica_introgressed::chr_D_sg_C_(Scaffold_1;HRSCAF_2)::sgE	arabica_cultivated__vs__arabica_introgressed	chr_D_sg_E_(Scaffold_2;HRSCAF_3)	4e	gene-LOC113742244	LOC113742244	LOC113742244	protein_coding	pentatricopeptide repeat-containing protein At3g48250%2C chloroplastic-like
arabica_cultivated__vs__arabica_introgressed::chr_D_sg_C_(Scaffold_1;HRSCAF_2)::sgE	arabica_cultivated__vs__arabica_introgressed	chr_D_sg_E_(Scaffold_2;HRSCAF_3)	4e	gene-LOC113742245	LOC113742245	LOC113742245	protein_coding	pachytene checkpoint protein 2 homolog
arabica_cultivated__vs__arabica_introgressed::chr_D_sg_C_(Scaffold_1;HRSCAF_2)::sgE	arabica_cultivated__vs__arabica_introgressed	chr_D_sg_E_(Scaffold_2;HRSCAF_3)	4e	gene-LOC113742250	LOC113742250	LOC113742250	protein_coding	uncharacterized LOC113742250
arabica_cultivated__vs__arabica_introgressed::chr_D_sg_C_(Scaffold_1;HRSCAF_2)::sgE	arabica_cultivated__vs__arabica_introgressed	chr_D_sg_E_(Scaffold_2;HRSCAF_3)	4e	gene-LOC113742248	LOC113742248	LOC113742248	protein_coding	tropinone reductase homolog At5g06060-like
arabica_cultivated__vs__arabica_introgressed::chr_D_sg_C_(Scaffold_1;HRSCAF_2)::sgE	arabica_cultivated__vs__arabica_introgressed	chr_D_sg_E_(Scaffold_2;HRSCAF_3)	4e	gene-LOC113742249	LOC113742249	LOC113742249	protein_coding	tropinone reductase homolog At5g06060-like
arabica_cultivated__vs__arabica_introgressed::chr_D_sg_C_(Scaffold_1;HRSCAF_2)::sgE	arabica_cultivated__vs__arabica_introgressed	chr_D_sg_E_(Scaffold_2;HRSCAF_3)	4e	gene-LOC113742242	LOC113742242	LOC113742242	protein_coding	uncharacterized LOC113742242
arabica_cultivated__vs__arabica_introgressed::chr_D_sg_C_(Scaffold_1;HRSCAF_2)::sgE	arabica_cultivated__vs__arabica_introgressed	chr_D_sg_E_(Scaffold_2;HRSCAF_3)	4e	gene-LOC113742243	LOC113742243	LOC113742243	protein_coding	pentatricopeptide repeat-containing protein At1g08070%2C chloroplastic-like
arabica_cultivated__vs__arabica_introgressed::chr_D_sg_C_(Scaffold_1;HRSCAF_2)::sgE	arabica_cultivated__vs__arabica_introgressed	chr_D_sg_E_(Scaffold_2;HRSCAF_3)	4e	gene-LOC113742754	LOC113742754	LOC113742754	protein_coding	protein JOKA2
arabica_cultivated__vs__arabica_introgressed::chr_D_sg_C_(Scaffold_1;HRSCAF_2)::sgE	arabica_cultivated__vs__arabica_introgressed	chr_D_sg_E_(Scaffold_2;HRSCAF_3)	4e	gene-LOC140005457	LOC140005457	LOC140005457	protein_coding	F-box/LRR-repeat protein At3g48880-like	defense_receptor
arabica_cultivated__vs__arabica_introgressed::chr_D_sg_C_(Scaffold_1;HRSCAF_2)::sgE	arabica_cultivated__vs__arabica_introgressed	chr_D_sg_E_(Scaffold_2;HRSCAF_3)	4e	gene-LOC113740732	LOC113740732	LOC113740732	protein_coding	arabinosyltransferase XEG113-like
arabica_cultivated__vs__arabica_introgressed::chr_D_sg_C_(Scaffold_1;HRSCAF_2)::sgE	arabica_cultivated__vs__arabica_introgressed	chr_D_sg_E_(Scaffold_2;HRSCAF_3)	4e	gene-LOC113740733	LOC113740733	LOC113740733	protein_coding	arabinosyltransferase XEG113-like
arabica_cultivated__vs__arabica_introgressed::chr_D_sg_C_(Scaffold_1;HRSCAF_2)::sgE	arabica_cultivated__vs__arabica_introgressed	chr_D_sg_E_(Scaffold_2;HRSCAF_3)	4e	gene-LOC113740734	LOC113740734	LOC113740734	protein_coding	arabinosyltransferase XEG113-like
arabica_cultivated__vs__arabica_introgressed::chr_D_sg_C_(Scaffold_1;HRSCAF_2)::sgE	arabica_cultivated__vs__arabica_introgressed	chr_D_sg_E_(Scaffold_2;HRSCAF_3)	4e	gene-LOC113740735	LOC113740735	LOC113740735	protein_coding	arabinosyltransferase XEG113-like
arabica_cultivated__vs__arabica_introgressed::chr_D_sg_C_(Scaffold_1;HRSCAF_2)::sgE	arabica_cultivated__vs__arabica_introgressed	chr_D_sg_E_(Scaffold_2;HRSCAF_3)	4e	gene-LOC113742606	LOC113742606	LOC113742606	protein_coding	plant intracellular Ras-group-related LRR protein 9	defense_receptor
arabica_cultivated__vs__arabica_introgressed::chr_D_sg_C_(Scaffold_1;HRSCAF_2)::sgE	arabica_cultivated__vs__arabica_introgressed	chr_D_sg_E_(Scaffold_2;HRSCAF_3)	4e	gene-LOC140005459	LOC140005459	LOC140005459	protein_coding	plant intracellular Ras-group-related LRR protein 9-like	defense_receptor
arabica_cultivated__vs__arabica_introgressed::chr_D_sg_C_(Scaffold_1;HRSCAF_2)::sgE	arabica_cultivated__vs__arabica_introgressed	chr_D_sg_E_(Scaffold_2;HRSCAF_3)	4e	gene-LOC113742812	LOC113742812	LOC113742812	protein_coding	plant intracellular Ras-group-related LRR protein 9-like	defense_receptor
arabica_cultivated__vs__arabica_introgressed::chr_D_sg_C_(Scaffold_1;HRSCAF_2)::sgE	arabica_cultivated__vs__arabica_introgressed	chr_D_sg_E_(Scaffold_2;HRSCAF_3)	4e	gene-LOC140005715	LOC140005715	LOC140005715	lncRNA	uncharacterized LOC140005715
arabica_cultivated__vs__arabica_introgressed::chr_D_sg_C_(Scaffold_1;HRSCAF_2)::sgE	arabica_cultivated__vs__arabica_introgressed	chr_D_sg_E_(Scaffold_2;HRSCAF_3)	4e	gene-LOC113741578	LOC113741578	LOC113741578	protein_coding	pentatricopeptide repeat-containing protein At1g09220%2C mitochondrial-like
arabica_cultivated__vs__arabica_introgressed::chr_D_sg_C_(Scaffold_1;HRSCAF_2)::sgE	arabica_cultivated__vs__arabica_introgressed	chr_D_sg_E_(Scaffold_2;HRSCAF_3)	4e	gene-LOC113743001	LOC113743001	LOC113743001	protein_coding	uncharacterized LOC113743001
arabica_cultivated__vs__arabica_introgressed::chr_D_sg_C_(Scaffold_1;HRSCAF_2)::sgE	arabica_cultivated__vs__arabica_introgressed	chr_D_sg_E_(Scaffold_2;HRSCAF_3)	4e	gene-LOC140005460	LOC140005460	LOC140005460	protein_coding	uncharacterized LOC140005460
arabica_cultivated__vs__arabica_introgressed::chr_D_sg_C_(Scaffold_1;HRSCAF_2)::sgE	arabica_cultivated__vs__arabica_introgressed	chr_D_sg_E_(Scaffold_2;HRSCAF_3)	4e	gene-LOC113741355	LOC113741355	LOC113741355	protein_coding	geranylgeranyl transferase type-1 subunit beta-like
arabica_cultivated__vs__arabica_introgressed::chr_D_sg_C_(Scaffold_1;HRSCAF_2)::sgE	arabica_cultivated__vs__arabica_introgressed	chr_D_sg_E_(Scaffold_2;HRSCAF_3)	4e	gene-LOC140004004	LOC140004004	LOC140004004	protein_coding	putative disease resistance protein At1g50180	stress_response
arabica_cultivated__vs__arabica_introgressed::chr_D_sg_C_(Scaffold_1;HRSCAF_2)::sgE	arabica_cultivated__vs__arabica_introgressed	chr_D_sg_E_(Scaffold_2;HRSCAF_3)	4e	gene-LOC113742791	LOC113742791	LOC113742791	protein_coding	probable disease resistance RPP8-like protein 2	stress_response
arabica_cultivated__vs__arabica_introgressed::chr_D_sg_C_(Scaffold_1;HRSCAF_2)::sgE	arabica_cultivated__vs__arabica_introgressed	chr_D_sg_E_(Scaffold_2;HRSCAF_3)	4e	gene-LOC113741997	LOC113741997	LOC113741997	protein_coding	C2 and GRAM domain-containing protein At5g50170
arabica_cultivated__vs__arabica_introgressed::chr_D_sg_C_(Scaffold_1;HRSCAF_2)::sgE	arabica_cultivated__vs__arabica_introgressed	chr_D_sg_E_(Scaffold_2;HRSCAF_3)	4e	gene-TRNAF-GAA-9	TRNAF-GAA	TRNAF-GAA	tRNA	transfer RNA phenylalanine (anticodon GAA)
arabica_cultivated__vs__arabica_introgressed::chr_D_sg_C_(Scaffold_1;HRSCAF_2)::sgE	arabica_cultivated__vs__arabica_introgressed	chr_D_sg_E_(Scaffold_2;HRSCAF_3)	4e	gene-TRNAF-GAA-10	TRNAF-GAA	TRNAF-GAA	tRNA	transfer RNA phenylalanine (anticodon GAA)
arabica_cultivated__vs__arabica_introgressed::chr_D_sg_C_(Scaffold_1;HRSCAF_2)::sgE	arabica_cultivated__vs__arabica_introgressed	chr_D_sg_E_(Scaffold_2;HRSCAF_3)	4e	gene-LOC113741294	LOC113741294	LOC113741294	protein_coding	uncharacterized LOC113741294
arabica_cultivated__vs__arabica_introgressed::chr_D_sg_C_(Scaffold_1;HRSCAF_2)::sgE	arabica_cultivated__vs__arabica_introgressed	chr_D_sg_E_(Scaffold_2;HRSCAF_3)	4e	gene-LOC113739422	LOC113739422	LOC113739422	protein_coding	pathogenesis-related leaf protein 6-like
arabica_cultivated__vs__arabica_introgressed::chr_D_sg_C_(Scaffold_1;HRSCAF_2)::sgE	arabica_cultivated__vs__arabica_introgressed	chr_D_sg_E_(Scaffold_2;HRSCAF_3)	4e	gene-LOC113739379	LOC113739379	LOC113739379	protein_coding	aldehyde dehydrogenase family 2 member C4
arabica_cultivated__vs__arabica_introgressed::chr_D_sg_C_(Scaffold_1;HRSCAF_2)::sgE	arabica_cultivated__vs__arabica_introgressed	chr_D_sg_E_(Scaffold_2;HRSCAF_3)	4e	gene-LOC113738640	LOC113738640	LOC113738640	protein_coding	uncharacterized LOC113738640
arabica_cultivated__vs__arabica_introgressed::chr_D_sg_C_(Scaffold_1;HRSCAF_2)::sgE	arabica_cultivated__vs__arabica_introgressed	chr_D_sg_E_(Scaffold_2;HRSCAF_3)	4e	gene-LOC113740738	LOC113740738	LOC113740738	protein_coding	NAC domain-containing protein JA2L-like	transcriptional_regulation
arabica_cultivated__vs__arabica_introgressed::chr_D_sg_C_(Scaffold_1;HRSCAF_2)::sgE	arabica_cultivated__vs__arabica_introgressed	chr_D_sg_E_(Scaffold_2;HRSCAF_3)	4e	gene-LOC113742836	LOC113742836	LOC113742836	protein_coding	L-type lectin-domain containing receptor kinase S.1	defense_receptor, kinase_signaling
arabica_cultivated__vs__arabica_introgressed::chr_D_sg_C_(Scaffold_1;HRSCAF_2)::sgE	arabica_cultivated__vs__arabica_introgressed	chr_D_sg_E_(Scaffold_2;HRSCAF_3)	4e	gene-LOC113742835	LOC113742835	LOC113742835	protein_coding	ferric reduction oxidase 8%2C mitochondrial
arabica_cultivated__vs__arabica_introgressed::chr_D_sg_C_(Scaffold_1;HRSCAF_2)::sgE	arabica_cultivated__vs__arabica_introgressed	chr_D_sg_E_(Scaffold_2;HRSCAF_3)	4e	gene-LOC113741904	LOC113741904	LOC113741904	protein_coding	U-box domain-containing protein 52-like
arabica_cultivated__vs__arabica_introgressed::chr_D_sg_C_(Scaffold_1;HRSCAF_2)::sgE	arabica_cultivated__vs__arabica_introgressed	chr_D_sg_E_(Scaffold_2;HRSCAF_3)	4e	gene-LOC113742559	LOC113742559	LOC113742559	protein_coding	DEAD-box ATP-dependent RNA helicase 20-like
arabica_cultivated__vs__arabica_introgressed::chr_D_sg_C_(Scaffold_1;HRSCAF_2)::sgE	arabica_cultivated__vs__arabica_introgressed	chr_D_sg_E_(Scaffold_2;HRSCAF_3)	4e	gene-LOC113741180	LOC113741180	LOC113741180	protein_coding	large ribosomal subunit protein uL15x-like
arabica_cultivated__vs__arabica_introgressed::chr_D_sg_C_(Scaffold_1;HRSCAF_2)::sgE	arabica_cultivated__vs__arabica_introgressed	chr_D_sg_E_(Scaffold_2;HRSCAF_3)	4e	gene-LOC113741456	LOC113741456	LOC113741456	protein_coding	diamine oxidase [copper-containing] 1%2C peroxisomal
arabica_cultivated__vs__arabica_introgressed::chr_D_sg_C_(Scaffold_1;HRSCAF_2)::sgE	arabica_cultivated__vs__arabica_introgressed	chr_D_sg_E_(Scaffold_2;HRSCAF_3)	4e	gene-LOC113740739	LOC113740739	LOC113740739	protein_coding	uncharacterized LOC113740739
arabica_cultivated__vs__arabica_introgressed::chr_D_sg_C_(Scaffold_1;HRSCAF_2)::sgE	arabica_cultivated__vs__arabica_introgressed	chr_D_sg_E_(Scaffold_2;HRSCAF_3)	4e	gene-LOC113740587	LOC113740587	LOC113740587	protein_coding	uncharacterized LOC113740587
arabica_cultivated__vs__arabica_introgressed::chr_D_sg_C_(Scaffold_1;HRSCAF_2)::sgE	arabica_cultivated__vs__arabica_introgressed	chr_D_sg_E_(Scaffold_2;HRSCAF_3)	4e	gene-LOC113742906	LOC113742906	LOC113742906	protein_coding	histone deacetylase 6
arabica_cultivated__vs__arabica_introgressed::chr_D_sg_C_(Scaffold_1;HRSCAF_2)::sgE	arabica_cultivated__vs__arabica_introgressed	chr_D_sg_E_(Scaffold_2;HRSCAF_3)	4e	gene-LOC113741905	LOC113741905	LOC113741905	protein_coding	uncharacterized LOC113741905
arabica_cultivated__vs__arabica_introgressed::chr_D_sg_C_(Scaffold_1;HRSCAF_2)::sgE	arabica_cultivated__vs__arabica_introgressed	chr_D_sg_E_(Scaffold_2;HRSCAF_3)	4e	gene-LOC113742011	LOC113742011	LOC113742011	protein_coding	xyloglucan endotransglucosylase protein 1-like
arabica_cultivated__vs__arabica_introgressed::chr_D_sg_C_(Scaffold_1;HRSCAF_2)::sgE	arabica_cultivated__vs__arabica_introgressed	chr_D_sg_E_(Scaffold_2;HRSCAF_3)	4e	gene-LOC113741285	LOC113741285	LOC113741285	protein_coding	bet1-like protein At4g14600
arabica_cultivated__vs__arabica_introgressed::chr_D_sg_C_(Scaffold_1;HRSCAF_2)::sgE	arabica_cultivated__vs__arabica_introgressed	chr_D_sg_E_(Scaffold_2;HRSCAF_3)	4e	gene-LOC113741940	LOC113741940	LOC113741940	protein_coding	putative pentatricopeptide repeat-containing protein At1g64310
arabica_cultivated__vs__arabica_introgressed::chr_D_sg_C_(Scaffold_1;HRSCAF_2)::sgE	arabica_cultivated__vs__arabica_introgressed	chr_D_sg_E_(Scaffold_2;HRSCAF_3)	4e	gene-LOC113741956	LOC113741956	LOC113741956	protein_coding	protein POOR HOMOLOGOUS SYNAPSIS 1
arabica_cultivated__vs__arabica_introgressed::chr_D_sg_C_(Scaffold_1;HRSCAF_2)::sgE	arabica_cultivated__vs__arabica_introgressed	chr_D_sg_E_(Scaffold_2;HRSCAF_3)	4e	gene-LOC113741352	LOC113741352	LOC113741352	protein_coding	protein LATERAL ORGAN BOUNDARIES
arabica_cultivated__vs__arabica_introgressed::chr_D_sg_C_(Scaffold_1;HRSCAF_2)::sgE	arabica_cultivated__vs__arabica_introgressed	chr_D_sg_E_(Scaffold_2;HRSCAF_3)	4e	gene-LOC113740556	LOC113740556	LOC113740556	protein_coding	oleosin H2-like
arabica_cultivated__vs__arabica_introgressed::chr_D_sg_C_(Scaffold_1;HRSCAF_2)::sgE	arabica_cultivated__vs__arabica_introgressed	chr_D_sg_E_(Scaffold_2;HRSCAF_3)	4e	gene-LOC113742908	LOC113742908	LOC113742908	protein_coding	AP-1 complex subunit mu-2-like
arabica_cultivated__vs__arabica_introgressed::chr_D_sg_C_(Scaffold_1;HRSCAF_2)::sgE	arabica_cultivated__vs__arabica_introgressed	chr_D_sg_E_(Scaffold_2;HRSCAF_3)	4e	gene-LOC113742907	LOC113742907	LOC113742907	protein_coding	tryptophan aminotransferase-related protein 2-like
arabica_cultivated__vs__arabica_introgressed::chr_D_sg_C_(Scaffold_1;HRSCAF_2)::sgE	arabica_cultivated__vs__arabica_introgressed	chr_D_sg_E_(Scaffold_2;HRSCAF_3)	4e	gene-LOC140006035	LOC140006035	LOC140006035	lncRNA	uncharacterized LOC140006035
arabica_cultivated__vs__arabica_introgressed::chr_D_sg_C_(Scaffold_1;HRSCAF_2)::sgE	arabica_cultivated__vs__arabica_introgressed	chr_D_sg_E_(Scaffold_2;HRSCAF_3)	4e	gene-LOC113741959	LOC113741959	LOC113741959	protein_coding	1%2C4-dihydroxy-2-naphthoyl-CoA thioesterase 1
arabica_cultivated__vs__arabica_introgressed::chr_D_sg_C_(Scaffold_1;HRSCAF_2)::sgE	arabica_cultivated__vs__arabica_introgressed	chr_D_sg_E_(Scaffold_2;HRSCAF_3)	4e	gene-LOC113740740	LOC113740740	LOC113740740	lncRNA	uncharacterized LOC113740740
arabica_cultivated__vs__arabica_introgressed::chr_D_sg_C_(Scaffold_1;HRSCAF_2)::sgE	arabica_cultivated__vs__arabica_introgressed	chr_D_sg_E_(Scaffold_2;HRSCAF_3)	4e	gene-LOC113740741	LOC113740741	LOC113740741	protein_coding	LEAF RUST 10 DISEASE-RESISTANCE LOCUS RECEPTOR-LIKE PROTEIN KINASE-like 2.1	defense_receptor, kinase_signaling, stress_response
arabica_cultivated__vs__arabica_introgressed::chr_D_sg_C_(Scaffold_1;HRSCAF_2)::sgE	arabica_cultivated__vs__arabica_introgressed	chr_D_sg_E_(Scaffold_2;HRSCAF_3)	4e	gene-LOC140006036	LOC140006036	LOC140006036	lncRNA	uncharacterized LOC140006036
arabica_cultivated__vs__arabica_introgressed::chr_D_sg_C_(Scaffold_1;HRSCAF_2)::sgE	arabica_cultivated__vs__arabica_introgressed	chr_D_sg_E_(Scaffold_2;HRSCAF_3)	4e	gene-LOC113741187	LOC113741187	LOC113741187	misc_RNA	uncharacterized LOC113741187
arabica_cultivated__vs__arabica_introgressed::chr_D_sg_C_(Scaffold_1;HRSCAF_2)::sgE	arabica_cultivated__vs__arabica_introgressed	chr_D_sg_E_(Scaffold_2;HRSCAF_3)	4e	gene-LOC113741186	LOC113741186	LOC113741186	protein_coding	LEAF RUST 10 DISEASE-RESISTANCE LOCUS RECEPTOR-LIKE PROTEIN KINASE-like 2.4	defense_receptor, kinase_signaling, stress_response
arabica_cultivated__vs__arabica_introgressed::chr_D_sg_C_(Scaffold_1;HRSCAF_2)::sgE	arabica_cultivated__vs__arabica_introgressed	chr_D_sg_E_(Scaffold_2;HRSCAF_3)	4e	gene-LOC113741966	LOC113741966	LOC113741966	lncRNA	uncharacterized LOC113741966
arabica_cultivated__vs__arabica_introgressed::chr_D_sg_C_(Scaffold_1;HRSCAF_2)::sgE	arabica_cultivated__vs__arabica_introgressed	chr_D_sg_E_(Scaffold_2;HRSCAF_3)	4e	gene-LOC140004421	LOC140004421	LOC140004421	protein_coding	F-box/kelch-repeat protein At3g06240-like
arabica_cultivated__vs__arabica_introgressed::chr_D_sg_C_(Scaffold_1;HRSCAF_2)::sgE	arabica_cultivated__vs__arabica_introgressed	chr_D_sg_E_(Scaffold_2;HRSCAF_3)	4e	gene-LOC113738968	LOC113738968	LOC113738968	protein_coding	F-box/kelch-repeat protein At3g06240-like
arabica_cultivated__vs__arabica_introgressed::chr_D_sg_C_(Scaffold_1;HRSCAF_2)::sgE	arabica_cultivated__vs__arabica_introgressed	chr_D_sg_E_(Scaffold_2;HRSCAF_3)	4e	gene-LOC140006037	LOC140006037	LOC140006037	protein_coding	F-box/kelch-repeat protein At3g23880-like
arabica_cultivated__vs__arabica_introgressed::chr_D_sg_C_(Scaffold_1;HRSCAF_2)::sgE	arabica_cultivated__vs__arabica_introgressed	chr_D_sg_E_(Scaffold_2;HRSCAF_3)	4e	gene-LOC140005462	LOC140005462	LOC140005462	protein_coding	F-box/kelch-repeat protein At3g23880-like
arabica_cultivated__vs__arabica_introgressed::chr_D_sg_C_(Scaffold_1;HRSCAF_2)::sgE	arabica_cultivated__vs__arabica_introgressed	chr_D_sg_E_(Scaffold_2;HRSCAF_3)	4e	gene-LOC140006038	LOC140006038	LOC140006038	protein_coding	probable disease resistance RPP8-like protein 2	stress_response
arabica_cultivated__vs__arabica_introgressed::chr_D_sg_C_(Scaffold_1;HRSCAF_2)::sgE	arabica_cultivated__vs__arabica_introgressed	chr_D_sg_E_(Scaffold_2;HRSCAF_3)	4e	gene-LOC140005463	LOC140005463	LOC140005463	protein_coding	uncharacterized LOC140005463
arabica_cultivated__vs__arabica_introgressed::chr_D_sg_C_(Scaffold_1;HRSCAF_2)::sgE	arabica_cultivated__vs__arabica_introgressed	chr_D_sg_E_(Scaffold_2;HRSCAF_3)	4e	gene-LOC140006039	LOC140006039	LOC140006039	protein_coding	replication protein A 70 kDa DNA-binding subunit D-like
arabica_cultivated__vs__arabica_introgressed::chr_D_sg_C_(Scaffold_1;HRSCAF_2)::sgE	arabica_cultivated__vs__arabica_introgressed	chr_D_sg_E_(Scaffold_2;HRSCAF_3)	4e	gene-LOC113720174	LOC113720174	LOC113720174	protein_coding	replication protein A 70 kDa DNA-binding subunit D-like
arabica_cultivated__vs__arabica_introgressed::chr_D_sg_C_(Scaffold_1;HRSCAF_2)::sgE	arabica_cultivated__vs__arabica_introgressed	chr_D_sg_E_(Scaffold_2;HRSCAF_3)	4e	gene-LOC113720175	LOC113720175	LOC113720175	protein_coding	probable disease resistance RPP8-like protein 2	stress_response
arabica_cultivated__vs__arabica_introgressed::chr_D_sg_C_(Scaffold_1;HRSCAF_2)::sgE	arabica_cultivated__vs__arabica_introgressed	chr_D_sg_E_(Scaffold_2;HRSCAF_3)	4e	gene-LOC113741842	LOC113741842	LOC113741842	protein_coding	probable disease resistance RPP8-like protein 2	stress_response
arabica_cultivated__vs__arabica_introgressed::chr_D_sg_C_(Scaffold_1;HRSCAF_2)::sgE	arabica_cultivated__vs__arabica_introgressed	chr_D_sg_E_(Scaffold_2;HRSCAF_3)	4e	gene-LOC140006040	LOC140006040	LOC140006040	lncRNA	uncharacterized LOC140006040
arabica_cultivated__vs__arabica_introgressed::chr_D_sg_C_(Scaffold_1;HRSCAF_2)::sgE	arabica_cultivated__vs__arabica_introgressed	chr_D_sg_E_(Scaffold_2;HRSCAF_3)	4e	gene-LOC140006041	LOC140006041	LOC140006041	lncRNA	uncharacterized LOC140006041
arabica_cultivated__vs__arabica_introgressed::chr_D_sg_C_(Scaffold_1;HRSCAF_2)::sgE	arabica_cultivated__vs__arabica_introgressed	chr_D_sg_E_(Scaffold_2;HRSCAF_3)	4e	gene-LOC140006042	LOC140006042	LOC140006042	protein_coding	replication protein A 70 kDa DNA-binding subunit D-like
arabica_cultivated__vs__arabica_introgressed::chr_D_sg_C_(Scaffold_1;HRSCAF_2)::sgE	arabica_cultivated__vs__arabica_introgressed	chr_D_sg_E_(Scaffold_2;HRSCAF_3)	4e	gene-LOC113740745	LOC113740745	LOC113740745	protein_coding	F-box/kelch-repeat protein At3g06240-like
arabica_cultivated__vs__arabica_introgressed::chr_D_sg_C_(Scaffold_1;HRSCAF_2)::sgE	arabica_cultivated__vs__arabica_introgressed	chr_D_sg_E_(Scaffold_2;HRSCAF_3)	4e	gene-LOC113741258	LOC113741258	LOC113741258	protein_coding	probable disease resistance RPP8-like protein 2	stress_response
arabica_cultivated__vs__arabica_introgressed::chr_D_sg_C_(Scaffold_1;HRSCAF_2)::sgE	arabica_cultivated__vs__arabica_introgressed	chr_D_sg_E_(Scaffold_2;HRSCAF_3)	4e	gene-LOC113740751	LOC113740751	LOC113740751	protein_coding	disease resistance protein RPP8-like	stress_response
arabica_cultivated__vs__arabica_introgressed::chr_D_sg_C_(Scaffold_1;HRSCAF_2)::sgE	arabica_cultivated__vs__arabica_introgressed	chr_D_sg_E_(Scaffold_2;HRSCAF_3)	4e	gene-LOC113740748	LOC113740748	LOC113740748	protein_coding	1%2C4-dihydroxy-2-naphthoyl-CoA thioesterase 1-like
arabica_cultivated__vs__arabica_introgressed::chr_D_sg_C_(Scaffold_1;HRSCAF_2)::sgE	arabica_cultivated__vs__arabica_introgressed	chr_D_sg_E_(Scaffold_2;HRSCAF_3)	4e	gene-LOC113740749	LOC113740749	LOC113740749	protein_coding	1%2C4-dihydroxy-2-naphthoyl-CoA thioesterase 1-like
arabica_cultivated__vs__arabica_introgressed::chr_D_sg_C_(Scaffold_1;HRSCAF_2)::sgE	arabica_cultivated__vs__arabica_introgressed	chr_D_sg_E_(Scaffold_2;HRSCAF_3)	4e	gene-LOC113740750	LOC113740750	LOC113740750	protein_coding	F-box/kelch-repeat protein At3g06240-like
arabica_cultivated__vs__arabica_introgressed::chr_D_sg_C_(Scaffold_1;HRSCAF_2)::sgE	arabica_cultivated__vs__arabica_introgressed	chr_D_sg_E_(Scaffold_2;HRSCAF_3)	4e	gene-LOC113743116	LOC113743116	LOC113743116	snoRNA	small nucleolar RNA R71
arabica_cultivated__vs__arabica_introgressed::chr_D_sg_C_(Scaffold_1;HRSCAF_2)::sgE	arabica_cultivated__vs__arabica_introgressed	chr_D_sg_E_(Scaffold_2;HRSCAF_3)	4e	gene-LOC140006043	LOC140006043	LOC140006043	protein_coding	uncharacterized LOC140006043
arabica_cultivated__vs__arabica_introgressed::chr_D_sg_C_(Scaffold_1;HRSCAF_2)::sgE	arabica_cultivated__vs__arabica_introgressed	chr_D_sg_E_(Scaffold_2;HRSCAF_3)	4e	gene-LOC140006044	LOC140006044	LOC140006044	protein_coding	FKBP12-interacting protein of 37 kDa-like
arabica_cultivated__vs__arabica_introgressed::chr_D_sg_C_(Scaffold_1;HRSCAF_2)::sgE	arabica_cultivated__vs__arabica_introgressed	chr_D_sg_E_(Scaffold_2;HRSCAF_3)	4e	gene-LOC113741886	LOC113741886	LOC113741886	protein_coding	short-chain dehydrogenase TIC 32 B%2C chloroplastic-like
arabica_cultivated__vs__arabica_introgressed::chr_D_sg_C_(Scaffold_1;HRSCAF_2)::sgE	arabica_cultivated__vs__arabica_introgressed	chr_D_sg_E_(Scaffold_2;HRSCAF_3)	4e	gene-LOC113741422	LOC113741422	LOC113741422	protein_coding	kinetochore protein SPC25 homolog
arabica_cultivated__vs__arabica_introgressed::chr_D_sg_C_(Scaffold_1;HRSCAF_2)::sgE	arabica_cultivated__vs__arabica_introgressed	chr_D_sg_E_(Scaffold_2;HRSCAF_3)	4e	gene-LOC140005716	LOC140005716	LOC140005716	lncRNA	uncharacterized LOC140005716
arabica_cultivated__vs__arabica_introgressed::chr_D_sg_C_(Scaffold_1;HRSCAF_2)::sgE	arabica_cultivated__vs__arabica_introgressed	chr_D_sg_E_(Scaffold_2;HRSCAF_3)	4e	gene-LOC113742870	LOC113742870	LOC113742870	protein_coding	uncharacterized LOC113742870
arabica_cultivated__vs__arabica_introgressed::chr_D_sg_C_(Scaffold_1;HRSCAF_2)::sgE	arabica_cultivated__vs__arabica_introgressed	chr_D_sg_E_(Scaffold_2;HRSCAF_3)	4e	gene-LOC113742762	LOC113742762	LOC113742762	protein_coding	cell division cycle protein 48 homolog
arabica_cultivated__vs__arabica_introgressed::chr_D_sg_C_(Scaffold_1;HRSCAF_2)::sgE	arabica_cultivated__vs__arabica_introgressed	chr_D_sg_E_(Scaffold_2;HRSCAF_3)	4e	gene-LOC113742738	LOC113742738	LOC113742738	protein_coding	arginine-specific demethylase JMJ20
arabica_cultivated__vs__arabica_introgressed::chr_D_sg_C_(Scaffold_1;HRSCAF_2)::sgE	arabica_cultivated__vs__arabica_introgressed	chr_D_sg_E_(Scaffold_2;HRSCAF_3)	4e	gene-LOC113743062	LOC113743062	LOC113743062	protein_coding	protein neprosin
arabica_cultivated__vs__arabica_introgressed::chr_D_sg_C_(Scaffold_1;HRSCAF_2)::sgE	arabica_cultivated__vs__arabica_introgressed	chr_D_sg_E_(Scaffold_2;HRSCAF_3)	4e	gene-LOC113740603	LOC113740603	LOC113740603	protein_coding	pterocarpan synthase 1-like
arabica_cultivated__vs__arabica_introgressed::chr_D_sg_C_(Scaffold_1;HRSCAF_2)::sgE	arabica_cultivated__vs__arabica_introgressed	chr_D_sg_E_(Scaffold_2;HRSCAF_3)	4e	gene-LOC113742079	LOC113742079	LOC113742079	protein_coding	pterocarpan synthase 1-like
arabica_cultivated__vs__arabica_introgressed::chr_D_sg_C_(Scaffold_1;HRSCAF_2)::sgE	arabica_cultivated__vs__arabica_introgressed	chr_D_sg_E_(Scaffold_2;HRSCAF_3)	4e	gene-LOC113740760	LOC113740760	LOC113740760	protein_coding	pterocarpan synthase 1-like
arabica_cultivated__vs__arabica_introgressed::chr_D_sg_C_(Scaffold_1;HRSCAF_2)::sgE	arabica_cultivated__vs__arabica_introgressed	chr_D_sg_E_(Scaffold_2;HRSCAF_3)	4e	gene-LOC113740761	LOC113740761	LOC113740761	protein_coding	pterocarpan synthase 1-like
arabica_cultivated__vs__arabica_introgressed::chr_D_sg_C_(Scaffold_1;HRSCAF_2)::sgE	arabica_cultivated__vs__arabica_introgressed	chr_D_sg_E_(Scaffold_2;HRSCAF_3)	4e	gene-LOC113741984	LOC113741984	LOC113741984	protein_coding	uncharacterized LOC113741984
arabica_cultivated__vs__arabica_introgressed::chr_D_sg_C_(Scaffold_1;HRSCAF_2)::sgE	arabica_cultivated__vs__arabica_introgressed	chr_D_sg_E_(Scaffold_2;HRSCAF_3)	4e	gene-LOC113740762	LOC113740762	LOC113740762	protein_coding	pterocarpan synthase 1-like
arabica_cultivated__vs__arabica_introgressed::chr_D_sg_C_(Scaffold_1;HRSCAF_2)::sgE	arabica_cultivated__vs__arabica_introgressed	chr_D_sg_E_(Scaffold_2;HRSCAF_3)	4e	gene-LOC113741983	LOC113741983	LOC113741983	protein_coding	protein neprosin-like
arabica_cultivated__vs__arabica_introgressed::chr_D_sg_C_(Scaffold_1;HRSCAF_2)::sgE	arabica_cultivated__vs__arabica_introgressed	chr_D_sg_E_(Scaffold_2;HRSCAF_3)	4e	gene-LOC113742638	LOC113742638	LOC113742638	protein_coding	protein neprosin-like
arabica_cultivated__vs__arabica_introgressed::chr_D_sg_C_(Scaffold_1;HRSCAF_2)::sgE	arabica_cultivated__vs__arabica_introgressed	chr_D_sg_E_(Scaffold_2;HRSCAF_3)	4e	gene-LOC113740763	LOC113740763	LOC113740763	protein_coding	protein FAR1-RELATED SEQUENCE 6-like
arabica_cultivated__vs__arabica_introgressed::chr_D_sg_C_(Scaffold_1;HRSCAF_2)::sgE	arabica_cultivated__vs__arabica_introgressed	chr_D_sg_E_(Scaffold_2;HRSCAF_3)	4e	gene-LOC113740770	LOC113740770	LOC113740770	protein_coding	uncharacterized LOC113740770
arabica_cultivated__vs__arabica_introgressed::chr_D_sg_C_(Scaffold_1;HRSCAF_2)::sgE	arabica_cultivated__vs__arabica_introgressed	chr_D_sg_E_(Scaffold_2;HRSCAF_3)	4e	gene-LOC113741504	LOC113741504	LOC113741504	protein_coding	plant UBX domain-containing protein 10-like
arabica_cultivated__vs__arabica_introgressed::chr_D_sg_C_(Scaffold_1;HRSCAF_2)::sgE	arabica_cultivated__vs__arabica_introgressed	chr_D_sg_E_(Scaffold_2;HRSCAF_3)	4e	gene-LOC113741503	LOC113741503	LOC113741503	protein_coding	inosine-5'-monophosphate dehydrogenase 2-like
arabica_cultivated__vs__arabica_introgressed::chr_D_sg_C_(Scaffold_1;HRSCAF_2)::sgE	arabica_cultivated__vs__arabica_introgressed	chr_D_sg_E_(Scaffold_2;HRSCAF_3)	4e	gene-LOC113740766	LOC113740766	LOC113740766	protein_coding	zinc finger BED domain-containing protein RICESLEEPER 2-like
arabica_cultivated__vs__arabica_introgressed::chr_D_sg_C_(Scaffold_1;HRSCAF_2)::sgE	arabica_cultivated__vs__arabica_introgressed	chr_D_sg_E_(Scaffold_2;HRSCAF_3)	4e	gene-LOC113741924	LOC113741924	LOC113741924	protein_coding	uncharacterized LOC113741924
arabica_cultivated__vs__arabica_introgressed::chr_D_sg_C_(Scaffold_1;HRSCAF_2)::sgE	arabica_cultivated__vs__arabica_introgressed	chr_D_sg_E_(Scaffold_2;HRSCAF_3)	4e	gene-LOC113741345	LOC113741345	LOC113741345	lncRNA	uncharacterized LOC113741345
arabica_cultivated__vs__arabica_introgressed::chr_D_sg_C_(Scaffold_1;HRSCAF_2)::sgE	arabica_cultivated__vs__arabica_introgressed	chr_D_sg_E_(Scaffold_2;HRSCAF_3)	4e	gene-LOC113740574	LOC113740574	LOC113740574	protein_coding	protein MODIFIER OF SNC1 1
arabica_cultivated__vs__arabica_introgressed::chr_D_sg_C_(Scaffold_1;HRSCAF_2)::sgE	arabica_cultivated__vs__arabica_introgressed	chr_D_sg_E_(Scaffold_2;HRSCAF_3)	4e	gene-LOC113741423	LOC113741423	LOC113741423	protein_coding	uncharacterized LOC113741423
arabica_cultivated__vs__arabica_introgressed::chr_D_sg_C_(Scaffold_1;HRSCAF_2)::sgE	arabica_cultivated__vs__arabica_introgressed	chr_D_sg_E_(Scaffold_2;HRSCAF_3)	4e	gene-LOC113740767	LOC113740767	LOC113740767	protein_coding	DELLA protein RGL3-like
arabica_cultivated__vs__arabica_introgressed::chr_D_sg_C_(Scaffold_1;HRSCAF_2)::sgE	arabica_cultivated__vs__arabica_introgressed	chr_D_sg_E_(Scaffold_2;HRSCAF_3)	4e	gene-LOC113741349	LOC113741349	LOC113741349	protein_coding	uncharacterized LOC113741349
arabica_cultivated__vs__arabica_introgressed::chr_D_sg_C_(Scaffold_1;HRSCAF_2)::sgE	arabica_cultivated__vs__arabica_introgressed	chr_D_sg_E_(Scaffold_2;HRSCAF_3)	4e	gene-LOC113741394	LOC113741394	LOC113741394	protein_coding	probable apyrase 7
arabica_cultivated__vs__arabica_introgressed::chr_D_sg_C_(Scaffold_1;HRSCAF_2)::sgE	arabica_cultivated__vs__arabica_introgressed	chr_D_sg_E_(Scaffold_2;HRSCAF_3)	4e	gene-LOC113741410	LOC113741410	LOC113741410	protein_coding	uncharacterized LOC113741410
arabica_cultivated__vs__arabica_introgressed::chr_D_sg_C_(Scaffold_1;HRSCAF_2)::sgE	arabica_cultivated__vs__arabica_introgressed	chr_D_sg_E_(Scaffold_2;HRSCAF_3)	4e	gene-LOC113740768	LOC113740768	LOC113740768	protein_coding	major allergen Pyr c 1-like
arabica_cultivated__vs__arabica_introgressed::chr_D_sg_C_(Scaffold_1;HRSCAF_2)::sgE	arabica_cultivated__vs__arabica_introgressed	chr_D_sg_E_(Scaffold_2;HRSCAF_3)	4e	gene-LOC113740769	LOC113740769	LOC113740769	protein_coding	major allergen Pru ar 1-like
arabica_cultivated__vs__arabica_introgressed::chr_D_sg_C_(Scaffold_1;HRSCAF_2)::sgE	arabica_cultivated__vs__arabica_introgressed	chr_D_sg_E_(Scaffold_2;HRSCAF_3)	4e	gene-LOC113741742	LOC113741742	LOC113741742	protein_coding	uncharacterized LOC113741742
arabica_cultivated__vs__arabica_introgressed::chr_D_sg_C_(Scaffold_1;HRSCAF_2)::sgE	arabica_cultivated__vs__arabica_introgressed	chr_D_sg_E_(Scaffold_2;HRSCAF_3)	4e	gene-LOC113741568	LOC113741568	LOC113741568	protein_coding	glycerophosphocholine acyltransferase 1-like
arabica_cultivated__vs__arabica_introgressed::chr_D_sg_C_(Scaffold_1;HRSCAF_2)::sgE	arabica_cultivated__vs__arabica_introgressed	chr_D_sg_E_(Scaffold_2;HRSCAF_3)	4e	gene-LOC113743135	LOC113743135	LOC113743135	snoRNA	small nucleolar RNA R71
arabica_cultivated__vs__arabica_introgressed::chr_D_sg_C_(Scaffold_1;HRSCAF_2)::sgE	arabica_cultivated__vs__arabica_introgressed	chr_D_sg_E_(Scaffold_2;HRSCAF_3)	4e	gene-LOC113741308	LOC113741308	LOC113741308	protein_coding	DEAD-box ATP-dependent RNA helicase 50-like
arabica_cultivated__vs__arabica_introgressed::chr_D_sg_C_(Scaffold_1;HRSCAF_2)::sgE	arabica_cultivated__vs__arabica_introgressed	chr_D_sg_E_(Scaffold_2;HRSCAF_3)	4e	gene-LOC113742667	LOC113742667	LOC113742667	protein_coding	protein MICRORCHIDIA 6
arabica_cultivated__vs__arabica_introgressed::chr_D_sg_C_(Scaffold_1;HRSCAF_2)::sgE	arabica_cultivated__vs__arabica_introgressed	chr_D_sg_E_(Scaffold_2;HRSCAF_3)	4e	gene-LOC113740771	LOC113740771	LOC113740771	protein_coding	vacuolar sorting protein 18-like
arabica_cultivated__vs__arabica_introgressed::chr_D_sg_C_(Scaffold_1;HRSCAF_2)::sgE	arabica_cultivated__vs__arabica_introgressed	chr_D_sg_E_(Scaffold_2;HRSCAF_3)	4e	gene-LOC113742205	LOC113742205	LOC113742205	protein_coding	serine/threonine protein phosphatase 2A 55 kDa regulatory subunit B beta isoform-like	kinase_signaling
arabica_cultivated__vs__arabica_introgressed::chr_D_sg_C_(Scaffold_1;HRSCAF_2)::sgE	arabica_cultivated__vs__arabica_introgressed	chr_D_sg_E_(Scaffold_2;HRSCAF_3)	4e	gene-LOC113740772	LOC113740772	LOC113740772	protein_coding	pectinesterase QRT1-like
arabica_cultivated__vs__arabica_introgressed::chr_D_sg_C_(Scaffold_1;HRSCAF_2)::sgE	arabica_cultivated__vs__arabica_introgressed	chr_D_sg_E_(Scaffold_2;HRSCAF_3)	4e	gene-LOC113740773	LOC113740773	LOC113740773	protein_coding	homeobox protein knotted-1-like 1
arabica_cultivated__vs__arabica_introgressed::chr_D_sg_C_(Scaffold_1;HRSCAF_2)::sgE	arabica_cultivated__vs__arabica_introgressed	chr_D_sg_E_(Scaffold_2;HRSCAF_3)	4e	gene-LOC113741259	LOC113741259	LOC113741259	protein_coding	protein STRICTOSIDINE SYNTHASE-LIKE 12
arabica_cultivated__vs__arabica_introgressed::chr_D_sg_C_(Scaffold_1;HRSCAF_2)::sgE	arabica_cultivated__vs__arabica_introgressed	chr_D_sg_E_(Scaffold_2;HRSCAF_3)	4e	gene-LOC113741556	LOC113741556	LOC113741556	protein_coding	uncharacterized LOC113741556
arabica_cultivated__vs__arabica_introgressed::chr_D_sg_C_(Scaffold_1;HRSCAF_2)::sgE	arabica_cultivated__vs__arabica_introgressed	chr_D_sg_E_(Scaffold_2;HRSCAF_3)	4e	gene-LOC113742131	LOC113742131	LOC113742131	protein_coding	uncharacterized LOC113742131
arabica_cultivated__vs__arabica_introgressed::chr_D_sg_C_(Scaffold_1;HRSCAF_2)::sgE	arabica_cultivated__vs__arabica_introgressed	chr_D_sg_E_(Scaffold_2;HRSCAF_3)	4e	gene-LOC113742132	LOC113742132	LOC113742132	protein_coding	glutaredoxin
arabica_cultivated__vs__arabica_introgressed::chr_D_sg_C_(Scaffold_1;HRSCAF_2)::sgE	arabica_cultivated__vs__arabica_introgressed	chr_D_sg_E_(Scaffold_2;HRSCAF_3)	4e	gene-LOC140005717	LOC140005717	LOC140005717	lncRNA	uncharacterized LOC140005717
arabica_cultivated__vs__arabica_introgressed::chr_D_sg_C_(Scaffold_1;HRSCAF_2)::sgE	arabica_cultivated__vs__arabica_introgressed	chr_D_sg_E_(Scaffold_2;HRSCAF_3)	4e	gene-LOC113742560	LOC113742560	LOC113742560	protein_coding	TSL-kinase interacting protein 1-like	kinase_signaling
arabica_cultivated__vs__arabica_introgressed::chr_D_sg_C_(Scaffold_1;HRSCAF_2)::sgE	arabica_cultivated__vs__arabica_introgressed	chr_D_sg_E_(Scaffold_2;HRSCAF_3)	4e	gene-LOC113742562	LOC113742562	LOC113742562	protein_coding	exosome complex component RRP4 homolog
arabica_cultivated__vs__arabica_introgressed::chr_D_sg_C_(Scaffold_1;HRSCAF_2)::sgE	arabica_cultivated__vs__arabica_introgressed	chr_D_sg_E_(Scaffold_2;HRSCAF_3)	4e	gene-LOC140006049	LOC140006049	LOC140006049	lncRNA	uncharacterized LOC140006049
arabica_cultivated__vs__arabica_introgressed::chr_D_sg_C_(Scaffold_1;HRSCAF_2)::sgE	arabica_cultivated__vs__arabica_introgressed	chr_D_sg_E_(Scaffold_2;HRSCAF_3)	4e	gene-LOC140006050	LOC140006050	LOC140006050	lncRNA	uncharacterized LOC140006050
arabica_cultivated__vs__arabica_introgressed::chr_D_sg_C_(Scaffold_1;HRSCAF_2)::sgE	arabica_cultivated__vs__arabica_introgressed	chr_D_sg_E_(Scaffold_2;HRSCAF_3)	4e	gene-LOC140006048	LOC140006048	LOC140006048	protein_coding	uncharacterized LOC140006048
arabica_cultivated__vs__arabica_introgressed::chr_D_sg_C_(Scaffold_1;HRSCAF_2)::sgE	arabica_cultivated__vs__arabica_introgressed	chr_D_sg_E_(Scaffold_2;HRSCAF_3)	4e	gene-LOC140006051	LOC140006051	LOC140006051	lncRNA	uncharacterized LOC140006051
arabica_cultivated__vs__arabica_introgressed::chr_D_sg_C_(Scaffold_1;HRSCAF_2)::sgE	arabica_cultivated__vs__arabica_introgressed	chr_D_sg_E_(Scaffold_2;HRSCAF_3)	4e	gene-LOC113742962	LOC113742962	LOC113742962	protein_coding	anthranilate phosphoribosyltransferase%2C chloroplastic
arabica_cultivated__vs__arabica_introgressed::chr_D_sg_C_(Scaffold_1;HRSCAF_2)::sgE	arabica_cultivated__vs__arabica_introgressed	chr_D_sg_E_(Scaffold_2;HRSCAF_3)	4e	gene-LOC113741822	LOC113741822	LOC113741822	protein_coding	uncharacterized LOC113741822
arabica_cultivated__vs__arabica_introgressed::chr_D_sg_C_(Scaffold_1;HRSCAF_2)::sgE	arabica_cultivated__vs__arabica_introgressed	chr_D_sg_E_(Scaffold_2;HRSCAF_3)	4e	gene-LOC113741529	LOC113741529	LOC113741529	protein_coding	uncharacterized LOC113741529
arabica_cultivated__vs__arabica_introgressed::chr_D_sg_C_(Scaffold_1;HRSCAF_2)::sgE	arabica_cultivated__vs__arabica_introgressed	chr_D_sg_E_(Scaffold_2;HRSCAF_3)	4e	gene-LOC113740775	LOC113740775	LOC113740775	protein_coding	transcription factor ABORTED MICROSPORES-like	transcriptional_regulation
arabica_cultivated__vs__arabica_introgressed::chr_D_sg_C_(Scaffold_1;HRSCAF_2)::sgE	arabica_cultivated__vs__arabica_introgressed	chr_D_sg_E_(Scaffold_2;HRSCAF_3)	4e	gene-LOC113741174	LOC113741174	LOC113741174	protein_coding	M phase phosphoprotein 10
arabica_cultivated__vs__arabica_introgressed::chr_D_sg_C_(Scaffold_1;HRSCAF_2)::sgE	arabica_cultivated__vs__arabica_introgressed	chr_D_sg_E_(Scaffold_2;HRSCAF_3)	4e	gene-LOC113742393	LOC113742393	LOC113742393	protein_coding	uncharacterized LOC113742393
arabica_cultivated__vs__arabica_introgressed::chr_D_sg_C_(Scaffold_1;HRSCAF_2)::sgE	arabica_cultivated__vs__arabica_introgressed	chr_D_sg_E_(Scaffold_2;HRSCAF_3)	4e	gene-LOC113740777	LOC113740777	LOC113740777	protein_coding	DUF21 domain-containing protein At2g14520
arabica_cultivated__vs__arabica_introgressed::chr_D_sg_C_(Scaffold_1;HRSCAF_2)::sgE	arabica_cultivated__vs__arabica_introgressed	chr_D_sg_E_(Scaffold_2;HRSCAF_3)	4e	gene-LOC113741813	LOC113741813	LOC113741813	protein_coding	uncharacterized LOC113741813
arabica_cultivated__vs__arabica_introgressed::chr_D_sg_C_(Scaffold_1;HRSCAF_2)::sgE	arabica_cultivated__vs__arabica_introgressed	chr_D_sg_E_(Scaffold_2;HRSCAF_3)	4e	gene-LOC140005464	LOC140005464	LOC140005464	protein_coding	uncharacterized LOC140005464
arabica_cultivated__vs__arabica_introgressed::chr_D_sg_C_(Scaffold_1;HRSCAF_2)::sgE	arabica_cultivated__vs__arabica_introgressed	chr_D_sg_E_(Scaffold_2;HRSCAF_3)	4e	gene-LOC113741286	LOC113741286	LOC113741286	protein_coding	uncharacterized LOC113741286
arabica_cultivated__vs__arabica_introgressed::chr_D_sg_C_(Scaffold_1;HRSCAF_2)::sgE	arabica_cultivated__vs__arabica_introgressed	chr_D_sg_E_(Scaffold_2;HRSCAF_3)	4e	gene-LOC113741173	LOC113741173	LOC113741173	protein_coding	disease resistance protein RPP8-like	stress_response
arabica_cultivated__vs__arabica_introgressed::chr_D_sg_C_(Scaffold_1;HRSCAF_2)::sgE	arabica_cultivated__vs__arabica_introgressed	chr_D_sg_E_(Scaffold_2;HRSCAF_3)	4e	gene-LOC113741298	LOC113741298	LOC113741298	protein_coding	putative disease resistance protein At1g50180	stress_response
arabica_cultivated__vs__arabica_introgressed::chr_D_sg_C_(Scaffold_1;HRSCAF_2)::sgE	arabica_cultivated__vs__arabica_introgressed	chr_D_sg_E_(Scaffold_2;HRSCAF_3)	4e	gene-LOC140005465	LOC140005465	LOC140005465	protein_coding	uncharacterized LOC140005465
arabica_cultivated__vs__arabica_introgressed::chr_D_sg_C_(Scaffold_1;HRSCAF_2)::sgE	arabica_cultivated__vs__arabica_introgressed	chr_D_sg_E_(Scaffold_2;HRSCAF_3)	4e	gene-LOC113740778	LOC113740778	LOC113740778	protein_coding	putative disease resistance protein At1g50180	stress_response
arabica_cultivated__vs__arabica_introgressed::chr_D_sg_C_(Scaffold_1;HRSCAF_2)::sgE	arabica_cultivated__vs__arabica_introgressed	chr_D_sg_E_(Scaffold_2;HRSCAF_3)	4e	gene-LOC113740779	LOC113740779	LOC113740779	protein_coding	putative disease resistance protein At1g50180	stress_response
arabica_cultivated__vs__arabica_introgressed::chr_D_sg_C_(Scaffold_1;HRSCAF_2)::sgE	arabica_cultivated__vs__arabica_introgressed	chr_D_sg_E_(Scaffold_2;HRSCAF_3)	4e	gene-LOC113742831	LOC113742831	LOC113742831	protein_coding	RAF-like serine/threonine-protein kinase PRAF	kinase_signaling
arabica_cultivated__vs__arabica_introgressed::chr_D_sg_C_(Scaffold_1;HRSCAF_2)::sgE	arabica_cultivated__vs__arabica_introgressed	chr_D_sg_E_(Scaffold_2;HRSCAF_3)	4e	gene-LOC113740780	LOC113740780	LOC113740780	protein_coding	probable disease resistance RPP8-like protein 2	stress_response
arabica_cultivated__vs__arabica_introgressed::chr_D_sg_C_(Scaffold_1;HRSCAF_2)::sgE	arabica_cultivated__vs__arabica_introgressed	chr_D_sg_E_(Scaffold_2;HRSCAF_3)	4e	gene-LOC113740781	LOC113740781	LOC113740781	protein_coding	monodehydroascorbate reductase 4%2C peroxisomal-like
arabica_cultivated__vs__arabica_introgressed::chr_D_sg_C_(Scaffold_1;HRSCAF_2)::sgE	arabica_cultivated__vs__arabica_introgressed	chr_D_sg_E_(Scaffold_2;HRSCAF_3)	4e	gene-LOC113740782	LOC113740782	LOC113740782	protein_coding	putative disease resistance RPP13-like protein 3	stress_response
arabica_cultivated__vs__arabica_introgressed::chr_D_sg_C_(Scaffold_1;HRSCAF_2)::sgE	arabica_cultivated__vs__arabica_introgressed	chr_D_sg_E_(Scaffold_2;HRSCAF_3)	4e	gene-LOC113742982	LOC113742982	LOC113742982	protein_coding	putative disease resistance RPP13-like protein 3	stress_response
arabica_cultivated__vs__arabica_introgressed::chr_D_sg_C_(Scaffold_1;HRSCAF_2)::sgE	arabica_cultivated__vs__arabica_introgressed	chr_D_sg_E_(Scaffold_2;HRSCAF_3)	4e	gene-LOC140005466	LOC140005466	LOC140005466	protein_coding	disease resistance protein RPP8-like	stress_response
arabica_cultivated__vs__arabica_introgressed::chr_D_sg_C_(Scaffold_1;HRSCAF_2)::sgE	arabica_cultivated__vs__arabica_introgressed	chr_D_sg_E_(Scaffold_2;HRSCAF_3)	4e	gene-LOC113740783	LOC113740783	LOC113740783	protein_coding	putative disease resistance RPP13-like protein 3	stress_response
arabica_cultivated__vs__arabica_introgressed::chr_D_sg_C_(Scaffold_1;HRSCAF_2)::sgE	arabica_cultivated__vs__arabica_introgressed	chr_D_sg_E_(Scaffold_2;HRSCAF_3)	4e	gene-LOC113743123	LOC113743123	LOC113743123	snoRNA	small nucleolar RNA R71
arabica_cultivated__vs__arabica_introgressed::chr_D_sg_C_(Scaffold_1;HRSCAF_2)::sgE	arabica_cultivated__vs__arabica_introgressed	chr_D_sg_E_(Scaffold_2;HRSCAF_3)	4e	gene-LOC113741802	LOC113741802	LOC113741802	protein_coding	putative disease resistance RPP13-like protein 3	stress_response
arabica_cultivated__vs__arabica_introgressed::chr_D_sg_C_(Scaffold_1;HRSCAF_2)::sgE	arabica_cultivated__vs__arabica_introgressed	chr_D_sg_E_(Scaffold_2;HRSCAF_3)	4e	gene-LOC113743110	LOC113743110	LOC113743110	snoRNA	small nucleolar RNA R71
arabica_cultivated__vs__arabica_introgressed::chr_D_sg_C_(Scaffold_1;HRSCAF_2)::sgE	arabica_cultivated__vs__arabica_introgressed	chr_D_sg_E_(Scaffold_2;HRSCAF_3)	4e	gene-LOC113742815	LOC113742815	LOC113742815	protein_coding	triose phosphate/phosphate translocator%2C non-green plastid%2C chloroplastic-like
arabica_cultivated__vs__arabica_introgressed::chr_D_sg_C_(Scaffold_1;HRSCAF_2)::sgE	arabica_cultivated__vs__arabica_introgressed	chr_D_sg_E_(Scaffold_2;HRSCAF_3)	4e	gene-LOC113743131	LOC113743131	LOC113743131	snoRNA	small nucleolar RNA R71
arabica_cultivated__vs__arabica_introgressed::chr_D_sg_C_(Scaffold_1;HRSCAF_2)::sgE	arabica_cultivated__vs__arabica_introgressed	chr_D_sg_E_(Scaffold_2;HRSCAF_3)	4e	gene-LOC113743097	LOC113743097	LOC113743097	snoRNA	small nucleolar RNA R71
arabica_cultivated__vs__arabica_introgressed::chr_D_sg_C_(Scaffold_1;HRSCAF_2)::sgE	arabica_cultivated__vs__arabica_introgressed	chr_D_sg_E_(Scaffold_2;HRSCAF_3)	4e	gene-LOC113743101	LOC113743101	LOC113743101	snoRNA	small nucleolar RNA R71
arabica_cultivated__vs__arabica_introgressed::chr_D_sg_C_(Scaffold_1;HRSCAF_2)::sgE	arabica_cultivated__vs__arabica_introgressed	chr_D_sg_E_(Scaffold_2;HRSCAF_3)	4e	gene-LOC113740790	LOC113740790	LOC113740790	protein_coding	transcription factor MYB115-like	transcriptional_regulation
arabica_cultivated__vs__arabica_introgressed::chr_D_sg_C_(Scaffold_1;HRSCAF_2)::sgE	arabica_cultivated__vs__arabica_introgressed	chr_D_sg_E_(Scaffold_2;HRSCAF_3)	4e	gene-LOC140005467	LOC140005467	LOC140005467	protein_coding	transcription factor MYB98-like	transcriptional_regulation
arabica_cultivated__vs__arabica_introgressed::chr_D_sg_C_(Scaffold_1;HRSCAF_2)::sgE	arabica_cultivated__vs__arabica_introgressed	chr_D_sg_E_(Scaffold_2;HRSCAF_3)	4e	gene-LOC113740309	LOC113740309	LOC113740309	protein_coding	GDSL esterase/lipase At5g62930
arabica_cultivated__vs__arabica_introgressed::chr_D_sg_C_(Scaffold_1;HRSCAF_2)::sgE	arabica_cultivated__vs__arabica_introgressed	chr_D_sg_E_(Scaffold_2;HRSCAF_3)	4e	gene-LOC140004587	LOC140004587	LOC140004587	protein_coding	probable boron transporter 2	transport_membrane
arabica_cultivated__vs__arabica_introgressed::chr_D_sg_C_(Scaffold_1;HRSCAF_2)::sgE	arabica_cultivated__vs__arabica_introgressed	chr_D_sg_E_(Scaffold_2;HRSCAF_3)	4e	gene-LOC113739907	LOC113739907	LOC113739907	protein_coding	iron-sulfur cluster assembly protein 1-like
arabica_cultivated__vs__arabica_introgressed::chr_D_sg_C_(Scaffold_1;HRSCAF_2)::sgE	arabica_cultivated__vs__arabica_introgressed	chr_D_sg_E_(Scaffold_2;HRSCAF_3)	4e	gene-LOC140006053	LOC140006053	LOC140006053	protein_coding	pantothenate kinase 2-like	kinase_signaling
arabica_cultivated__vs__arabica_introgressed::chr_D_sg_C_(Scaffold_1;HRSCAF_2)::sgE	arabica_cultivated__vs__arabica_introgressed	chr_D_sg_E_(Scaffold_2;HRSCAF_3)	4e	gene-TRNAP-UGG-20	TRNAP-UGG	TRNAP-UGG	tRNA	transfer RNA proline (anticodon UGG)
arabica_cultivated__vs__arabica_introgressed::chr_D_sg_C_(Scaffold_1;HRSCAF_2)::sgE	arabica_cultivated__vs__arabica_introgressed	chr_D_sg_E_(Scaffold_2;HRSCAF_3)	4e	gene-LOC113739910	LOC113739910	LOC113739910	protein_coding	uncharacterized LOC113739910
arabica_cultivated__vs__arabica_introgressed::chr_D_sg_C_(Scaffold_1;HRSCAF_2)::sgE	arabica_cultivated__vs__arabica_introgressed	chr_D_sg_E_(Scaffold_2;HRSCAF_3)	4e	gene-LOC140006054	LOC140006054	LOC140006054	protein_coding	dof zinc finger protein DOF5.6-like
arabica_cultivated__vs__arabica_introgressed::chr_D_sg_C_(Scaffold_1;HRSCAF_2)::sgE	arabica_cultivated__vs__arabica_introgressed	chr_D_sg_E_(Scaffold_2;HRSCAF_3)	4e	gene-LOC140005468	LOC140005468	LOC140005468	protein_coding	uncharacterized LOC140005468
arabica_cultivated__vs__arabica_introgressed::chr_D_sg_C_(Scaffold_1;HRSCAF_2)::sgE	arabica_cultivated__vs__arabica_introgressed	chr_D_sg_E_(Scaffold_2;HRSCAF_3)	4e	gene-LOC140005469	LOC140005469	LOC140005469	protein_coding	uncharacterized LOC140005469
arabica_cultivated__vs__arabica_introgressed::chr_D_sg_C_(Scaffold_1;HRSCAF_2)::sgE	arabica_cultivated__vs__arabica_introgressed	chr_D_sg_E_(Scaffold_2;HRSCAF_3)	4e	gene-LOC113739908	LOC113739908	LOC113739908	protein_coding	serine/threonine-protein kinase ATM	kinase_signaling
arabica_cultivated__vs__arabica_introgressed::chr_D_sg_C_(Scaffold_1;HRSCAF_2)::sgE	arabica_cultivated__vs__arabica_introgressed	chr_D_sg_E_(Scaffold_2;HRSCAF_3)	4e	gene-LOC140006056	LOC140006056	LOC140006056	protein_coding	probable inactive poly [ADP-ribose] polymerase SRO5
arabica_cultivated__vs__arabica_introgressed::chr_D_sg_C_(Scaffold_1;HRSCAF_2)::sgE	arabica_cultivated__vs__arabica_introgressed	chr_D_sg_E_(Scaffold_2;HRSCAF_3)	4e	gene-LOC140004548	LOC140004548	LOC140004548	protein_coding	putative pentatricopeptide repeat-containing protein At5g08490
arabica_cultivated__vs__arabica_introgressed::chr_D_sg_C_(Scaffold_1;HRSCAF_2)::sgE	arabica_cultivated__vs__arabica_introgressed	chr_D_sg_E_(Scaffold_2;HRSCAF_3)	4e	gene-LOC113707980	LOC113707980	LOC113707980	protein_coding	probable inactive poly [ADP-ribose] polymerase SRO5
arabica_cultivated__vs__arabica_introgressed::chr_D_sg_C_(Scaffold_1;HRSCAF_2)::sgE	arabica_cultivated__vs__arabica_introgressed	chr_D_sg_E_(Scaffold_2;HRSCAF_3)	4e	gene-LOC113707977	LOC113707977	LOC113707977	protein_coding	putative pentatricopeptide repeat-containing protein At5g08490
arabica_cultivated__vs__arabica_introgressed::chr_D_sg_C_(Scaffold_1;HRSCAF_2)::sgE	arabica_cultivated__vs__arabica_introgressed	chr_D_sg_E_(Scaffold_2;HRSCAF_3)	4e	gene-LOC113707946	LOC113707946	LOC113707946	protein_coding	uncharacterized LOC113707946
arabica_cultivated__vs__arabica_introgressed::chr_D_sg_C_(Scaffold_1;HRSCAF_2)::sgE	arabica_cultivated__vs__arabica_introgressed	chr_D_sg_E_(Scaffold_2;HRSCAF_3)	4e	gene-LOC113708424	LOC113708424	LOC113708424	protein_coding	protein ALP1-like
arabica_cultivated__vs__arabica_introgressed::chr_D_sg_C_(Scaffold_1;HRSCAF_2)::sgE	arabica_cultivated__vs__arabica_introgressed	chr_D_sg_E_(Scaffold_2;HRSCAF_3)	4e	gene-LOC140005470	LOC140005470	LOC140005470	protein_coding	uncharacterized LOC140005470
arabica_cultivated__vs__arabica_introgressed::chr_D_sg_C_(Scaffold_1;HRSCAF_2)::sgE	arabica_cultivated__vs__arabica_introgressed	chr_D_sg_E_(Scaffold_2;HRSCAF_3)	4e	gene-LOC113738432	LOC113738432	LOC113738432	protein_coding	putative disease resistance RPP13-like protein 3	stress_response
arabica_cultivated__vs__arabica_introgressed::chr_D_sg_C_(Scaffold_1;HRSCAF_2)::sgE	arabica_cultivated__vs__arabica_introgressed	chr_D_sg_E_(Scaffold_2;HRSCAF_3)	4e	gene-LOC140005471	LOC140005471	LOC140005471	protein_coding	limonoid 7-O-acetyltransferse-like
arabica_cultivated__vs__arabica_introgressed::chr_D_sg_C_(Scaffold_1;HRSCAF_2)::sgE	arabica_cultivated__vs__arabica_introgressed	chr_D_sg_E_(Scaffold_2;HRSCAF_3)	4e	gene-LOC140006057	LOC140006057	LOC140006057	protein_coding	1-deoxy-D-xylulose 5-phosphate reductoisomerase%2C chloroplastic-like
arabica_cultivated__vs__arabica_introgressed::chr_D_sg_C_(Scaffold_1;HRSCAF_2)::sgE	arabica_cultivated__vs__arabica_introgressed	chr_D_sg_E_(Scaffold_2;HRSCAF_3)	4e	gene-LOC113743122	LOC113743122	LOC113743122	snoRNA	small nucleolar RNA R71
arabica_cultivated__vs__arabica_introgressed::chr_D_sg_C_(Scaffold_1;HRSCAF_2)::sgE	arabica_cultivated__vs__arabica_introgressed	chr_D_sg_E_(Scaffold_2;HRSCAF_3)	4e	gene-LOC113741024	LOC113741024	LOC113741024	protein_coding	replication protein A 70 kDa DNA-binding subunit B-like
arabica_cultivated__vs__arabica_introgressed::chr_D_sg_C_(Scaffold_1;HRSCAF_2)::sgE	arabica_cultivated__vs__arabica_introgressed	chr_D_sg_E_(Scaffold_2;HRSCAF_3)	4e	gene-LOC113742805	LOC113742805	LOC113742805	protein_coding	putative disease resistance RPP13-like protein 3	stress_response
arabica_cultivated__vs__arabica_introgressed::chr_D_sg_C_(Scaffold_1;HRSCAF_2)::sgE	arabica_cultivated__vs__arabica_introgressed	chr_D_sg_E_(Scaffold_2;HRSCAF_3)	4e	gene-LOC113739914	LOC113739914	LOC113739914	protein_coding	probable disease resistance RPP8-like protein 2	stress_response
arabica_cultivated__vs__arabica_introgressed::chr_D_sg_C_(Scaffold_1;HRSCAF_2)::sgE	arabica_cultivated__vs__arabica_introgressed	chr_D_sg_E_(Scaffold_2;HRSCAF_3)	4e	gene-LOC140005472	LOC140005472	LOC140005472	protein_coding	uncharacterized LOC140005472
arabica_cultivated__vs__arabica_introgressed::chr_D_sg_C_(Scaffold_1;HRSCAF_2)::sgE	arabica_cultivated__vs__arabica_introgressed	chr_D_sg_E_(Scaffold_2;HRSCAF_3)	4e	gene-LOC113740794	LOC113740794	LOC113740794	protein_coding	putative disease resistance protein At1g50180	stress_response
arabica_cultivated__vs__arabica_introgressed::chr_D_sg_C_(Scaffold_1;HRSCAF_2)::sgE	arabica_cultivated__vs__arabica_introgressed	chr_D_sg_E_(Scaffold_2;HRSCAF_3)	4e	gene-LOC140005473	LOC140005473	LOC140005473	protein_coding	disease resistance protein RPP8-like	stress_response
arabica_cultivated__vs__arabica_introgressed::chr_D_sg_C_(Scaffold_1;HRSCAF_2)::sgE	arabica_cultivated__vs__arabica_introgressed	chr_D_sg_E_(Scaffold_2;HRSCAF_3)	4e	gene-LOC113742547	LOC113742547	LOC113742547	protein_coding	1-deoxy-D-xylulose 5-phosphate reductoisomerase%2C chloroplastic
arabica_cultivated__vs__arabica_introgressed::chr_D_sg_C_(Scaffold_1;HRSCAF_2)::sgE	arabica_cultivated__vs__arabica_introgressed	chr_D_sg_E_(Scaffold_2;HRSCAF_3)	4e	gene-LOC140005474	LOC140005474	LOC140005474	protein_coding	uncharacterized LOC140005474
arabica_cultivated__vs__arabica_introgressed::chr_D_sg_C_(Scaffold_1;HRSCAF_2)::sgE	arabica_cultivated__vs__arabica_introgressed	chr_D_sg_E_(Scaffold_2;HRSCAF_3)	4e	gene-LOC113742523	LOC113742523	LOC113742523	protein_coding	peroxisomal membrane protein PEX14	transport_membrane
arabica_cultivated__vs__arabica_introgressed::chr_D_sg_C_(Scaffold_1;HRSCAF_2)::sgE	arabica_cultivated__vs__arabica_introgressed	chr_D_sg_E_(Scaffold_2;HRSCAF_3)	4e	gene-LOC140006058	LOC140006058	LOC140006058	protein_coding	uncharacterized LOC140006058
arabica_cultivated__vs__arabica_introgressed::chr_D_sg_C_(Scaffold_1;HRSCAF_2)::sgE	arabica_cultivated__vs__arabica_introgressed	chr_D_sg_E_(Scaffold_2;HRSCAF_3)	4e	gene-LOC113739917	LOC113739917	LOC113739917	protein_coding	protein KINESIN LIGHT CHAIN-RELATED 3-like
arabica_cultivated__vs__arabica_introgressed::chr_D_sg_C_(Scaffold_1;HRSCAF_2)::sgE	arabica_cultivated__vs__arabica_introgressed	chr_D_sg_E_(Scaffold_2;HRSCAF_3)	4e	gene-LOC113742706	LOC113742706	LOC113742706	protein_coding	probable disease resistance RPP8-like protein 2	stress_response
arabica_cultivated__vs__arabica_introgressed::chr_D_sg_C_(Scaffold_1;HRSCAF_2)::sgE	arabica_cultivated__vs__arabica_introgressed	chr_D_sg_E_(Scaffold_2;HRSCAF_3)	4e	gene-LOC113741231	LOC113741231	LOC113741231	protein_coding	putative disease resistance RPP13-like protein 3	stress_response
arabica_cultivated__vs__arabica_introgressed::chr_D_sg_C_(Scaffold_1;HRSCAF_2)::sgE	arabica_cultivated__vs__arabica_introgressed	chr_D_sg_E_(Scaffold_2;HRSCAF_3)	4e	gene-LOC140005718	LOC140005718	LOC140005718	lncRNA	uncharacterized LOC140005718
arabica_cultivated__vs__arabica_introgressed::chr_D_sg_C_(Scaffold_1;HRSCAF_2)::sgE	arabica_cultivated__vs__arabica_introgressed	chr_D_sg_E_(Scaffold_2;HRSCAF_3)	4e	gene-LOC113740798	LOC113740798	LOC113740798	protein_coding	protein FAR1-RELATED SEQUENCE 5-like
arabica_cultivated__vs__arabica_introgressed::chr_D_sg_C_(Scaffold_1;HRSCAF_2)::sgE	arabica_cultivated__vs__arabica_introgressed	chr_D_sg_E_(Scaffold_2;HRSCAF_3)	4e	gene-LOC113740799	LOC113740799	LOC113740799	protein_coding	putative disease resistance RPP13-like protein 3	stress_response
arabica_cultivated__vs__arabica_introgressed::chr_D_sg_C_(Scaffold_1;HRSCAF_2)::sgE	arabica_cultivated__vs__arabica_introgressed	chr_D_sg_E_(Scaffold_2;HRSCAF_3)	4e	gene-TRNAL-UAG-6	TRNAL-UAG	TRNAL-UAG	tRNA	transfer RNA leucine (anticodon UAG)
arabica_cultivated__vs__arabica_introgressed::chr_D_sg_C_(Scaffold_1;HRSCAF_2)::sgE	arabica_cultivated__vs__arabica_introgressed	chr_D_sg_E_(Scaffold_2;HRSCAF_3)	4e	gene-LOC113741296	LOC113741296	LOC113741296	protein_coding	serine/threonine/tyrosine-protein kinase HT1	kinase_signaling
arabica_cultivated__vs__arabica_introgressed::chr_D_sg_C_(Scaffold_1;HRSCAF_2)::sgE	arabica_cultivated__vs__arabica_introgressed	chr_D_sg_E_(Scaffold_2;HRSCAF_3)	4e	gene-LOC113741549	LOC113741549	LOC113741549	lncRNA	uncharacterized LOC113741549
arabica_cultivated__vs__arabica_introgressed::chr_D_sg_C_(Scaffold_1;HRSCAF_2)::sgE	arabica_cultivated__vs__arabica_introgressed	chr_D_sg_E_(Scaffold_2;HRSCAF_3)	4e	gene-LOC113742432	LOC113742432	LOC113742432	protein_coding	4-hydroxybenzoate geranyltransferase 2
arabica_cultivated__vs__arabica_introgressed::chr_D_sg_C_(Scaffold_1;HRSCAF_2)::sgE	arabica_cultivated__vs__arabica_introgressed	chr_D_sg_E_(Scaffold_2;HRSCAF_3)	4e	gene-LOC113742433	LOC113742433	LOC113742433	protein_coding	uncharacterized LOC113742433
arabica_cultivated__vs__arabica_introgressed::chr_D_sg_C_(Scaffold_1;HRSCAF_2)::sgE	arabica_cultivated__vs__arabica_introgressed	chr_D_sg_E_(Scaffold_2;HRSCAF_3)	4e	gene-LOC140005475	LOC140005475	LOC140005475	protein_coding	4-hydroxybenzoate polyprenyltransferase%2C mitochondrial-like
arabica_cultivated__vs__arabica_introgressed::chr_D_sg_C_(Scaffold_1;HRSCAF_2)::sgE	arabica_cultivated__vs__arabica_introgressed	chr_D_sg_E_(Scaffold_2;HRSCAF_3)	4e	gene-LOC113741544	LOC113741544	LOC113741544	protein_coding	4-hydroxybenzoate geranyltransferase 2-like
arabica_cultivated__vs__arabica_introgressed::chr_D_sg_C_(Scaffold_1;HRSCAF_2)::sgE	arabica_cultivated__vs__arabica_introgressed	chr_D_sg_E_(Scaffold_2;HRSCAF_3)	4e	gene-LOC113742845	LOC113742845	LOC113742845	protein_coding	general transcription and DNA repair factor IIH subunit TFB4-like
arabica_cultivated__vs__arabica_introgressed::chr_D_sg_C_(Scaffold_1;HRSCAF_2)::sgE	arabica_cultivated__vs__arabica_introgressed	chr_D_sg_E_(Scaffold_2;HRSCAF_3)	4e	gene-LOC113741874	LOC113741874	LOC113741874	protein_coding	metal tolerance protein 1
arabica_cultivated__vs__arabica_introgressed::chr_D_sg_C_(Scaffold_1;HRSCAF_2)::sgE	arabica_cultivated__vs__arabica_introgressed	chr_D_sg_E_(Scaffold_2;HRSCAF_3)	4e	gene-LOC140006060	LOC140006060	LOC140006060	lncRNA	uncharacterized LOC140006060
arabica_cultivated__vs__arabica_introgressed::chr_D_sg_C_(Scaffold_1;HRSCAF_2)::sgE	arabica_cultivated__vs__arabica_introgressed	chr_D_sg_E_(Scaffold_2;HRSCAF_3)	4e	gene-LOC113740802	LOC113740802	LOC113740802	protein_coding	uncharacterized LOC113740802
arabica_cultivated__vs__arabica_introgressed::chr_D_sg_C_(Scaffold_1;HRSCAF_2)::sgE	arabica_cultivated__vs__arabica_introgressed	chr_D_sg_E_(Scaffold_2;HRSCAF_3)	4e	gene-LOC140005476	LOC140005476	LOC140005476	protein_coding	cysteine proteinase inhibitor 4-like
arabica_cultivated__vs__arabica_introgressed::chr_D_sg_C_(Scaffold_1;HRSCAF_2)::sgE	arabica_cultivated__vs__arabica_introgressed	chr_D_sg_E_(Scaffold_2;HRSCAF_3)	4e	gene-LOC140006061	LOC140006061	LOC140006061	lncRNA	uncharacterized LOC140006061
arabica_cultivated__vs__arabica_introgressed::chr_D_sg_C_(Scaffold_1;HRSCAF_2)::sgE	arabica_cultivated__vs__arabica_introgressed	chr_D_sg_E_(Scaffold_2;HRSCAF_3)	4e	gene-LOC140006062	LOC140006062	LOC140006062	lncRNA	uncharacterized LOC140006062
arabica_cultivated__vs__arabica_introgressed::chr_D_sg_C_(Scaffold_1;HRSCAF_2)::sgE	arabica_cultivated__vs__arabica_introgressed	chr_D_sg_E_(Scaffold_2;HRSCAF_3)	4e	gene-LOC140005477	LOC140005477	LOC140005477	protein_coding	uncharacterized LOC140005477
arabica_cultivated__vs__arabica_introgressed::chr_D_sg_C_(Scaffold_1;HRSCAF_2)::sgE	arabica_cultivated__vs__arabica_introgressed	chr_D_sg_E_(Scaffold_2;HRSCAF_3)	4e	gene-LOC140005478	LOC140005478	LOC140005478	protein_coding	cysteine proteinase inhibitor 4-like
arabica_cultivated__vs__arabica_introgressed::chr_D_sg_C_(Scaffold_1;HRSCAF_2)::sgE	arabica_cultivated__vs__arabica_introgressed	chr_D_sg_E_(Scaffold_2;HRSCAF_3)	4e	gene-LOC140006063	LOC140006063	LOC140006063	lncRNA	uncharacterized LOC140006063
arabica_cultivated__vs__arabica_introgressed::chr_D_sg_C_(Scaffold_1;HRSCAF_2)::sgE	arabica_cultivated__vs__arabica_introgressed	chr_D_sg_E_(Scaffold_2;HRSCAF_3)	4e	gene-LOC140006064	LOC140006064	LOC140006064	lncRNA	uncharacterized LOC140006064
arabica_cultivated__vs__arabica_introgressed::chr_D_sg_C_(Scaffold_1;HRSCAF_2)::sgE	arabica_cultivated__vs__arabica_introgressed	chr_D_sg_E_(Scaffold_2;HRSCAF_3)	4e	gene-LOC140005479	LOC140005479	LOC140005479	protein_coding	uncharacterized LOC140005479
arabica_cultivated__vs__arabica_introgressed::chr_D_sg_C_(Scaffold_1;HRSCAF_2)::sgE	arabica_cultivated__vs__arabica_introgressed	chr_D_sg_E_(Scaffold_2;HRSCAF_3)	4e	gene-LOC140005480	LOC140005480	LOC140005480	protein_coding	cysteine proteinase inhibitor 4-like
arabica_cultivated__vs__arabica_introgressed::chr_D_sg_C_(Scaffold_1;HRSCAF_2)::sgE	arabica_cultivated__vs__arabica_introgressed	chr_D_sg_E_(Scaffold_2;HRSCAF_3)	4e	gene-LOC113740803	LOC113740803	LOC113740803	protein_coding	cysteine proteinase inhibitor 1-like
arabica_cultivated__vs__arabica_introgressed::chr_D_sg_C_(Scaffold_1;HRSCAF_2)::sgE	arabica_cultivated__vs__arabica_introgressed	chr_D_sg_E_(Scaffold_2;HRSCAF_3)	4e	gene-LOC140006065	LOC140006065	LOC140006065	lncRNA	uncharacterized LOC140006065
arabica_cultivated__vs__arabica_introgressed::chr_D_sg_C_(Scaffold_1;HRSCAF_2)::sgE	arabica_cultivated__vs__arabica_introgressed	chr_D_sg_E_(Scaffold_2;HRSCAF_3)	4e	gene-LOC140005481	LOC140005481	LOC140005481	protein_coding	uncharacterized LOC140005481
arabica_cultivated__vs__arabica_introgressed::chr_D_sg_C_(Scaffold_1;HRSCAF_2)::sgE	arabica_cultivated__vs__arabica_introgressed	chr_D_sg_E_(Scaffold_2;HRSCAF_3)	4e	gene-LOC140005482	LOC140005482	LOC140005482	protein_coding	cysteine proteinase inhibitor 4-like
arabica_cultivated__vs__arabica_introgressed::chr_D_sg_C_(Scaffold_1;HRSCAF_2)::sgE	arabica_cultivated__vs__arabica_introgressed	chr_D_sg_E_(Scaffold_2;HRSCAF_3)	4e	gene-LOC113740805	LOC113740805	LOC113740805	protein_coding	cysteine proteinase inhibitor 1-like
arabica_cultivated__vs__arabica_introgressed::chr_D_sg_C_(Scaffold_1;HRSCAF_2)::sgE	arabica_cultivated__vs__arabica_introgressed	chr_D_sg_E_(Scaffold_2;HRSCAF_3)	4e	gene-LOC113742174	LOC113742174	LOC113742174	protein_coding	cysteine proteinase inhibitor 1-like
arabica_cultivated__vs__arabica_introgressed::chr_D_sg_C_(Scaffold_1;HRSCAF_2)::sgE	arabica_cultivated__vs__arabica_introgressed	chr_D_sg_E_(Scaffold_2;HRSCAF_3)	4e	gene-LOC113741658	LOC113741658	LOC113741658	protein_coding	cysteine proteinase inhibitor 4
arabica_cultivated__vs__arabica_introgressed::chr_D_sg_C_(Scaffold_1;HRSCAF_2)::sgE	arabica_cultivated__vs__arabica_introgressed	chr_D_sg_E_(Scaffold_2;HRSCAF_3)	4e	gene-LOC140005719	LOC140005719	LOC140005719	protein_coding	uncharacterized LOC140005719
arabica_cultivated__vs__arabica_introgressed::chr_D_sg_C_(Scaffold_1;HRSCAF_2)::sgE	arabica_cultivated__vs__arabica_introgressed	chr_D_sg_E_(Scaffold_2;HRSCAF_3)	4e	gene-LOC140005720	LOC140005720	LOC140005720	lncRNA	uncharacterized LOC140005720
arabica_cultivated__vs__arabica_introgressed::chr_D_sg_C_(Scaffold_1;HRSCAF_2)::sgE	arabica_cultivated__vs__arabica_introgressed	chr_D_sg_E_(Scaffold_2;HRSCAF_3)	4e	gene-LOC113740806	LOC113740806	LOC113740806	protein_coding	disease resistance protein RPP13-like	stress_response
arabica_cultivated__vs__arabica_introgressed::chr_D_sg_C_(Scaffold_1;HRSCAF_2)::sgE	arabica_cultivated__vs__arabica_introgressed	chr_D_sg_E_(Scaffold_2;HRSCAF_3)	4e	gene-LOC140005483	LOC140005483	LOC140005483	protein_coding	uncharacterized LOC140005483
arabica_cultivated__vs__arabica_introgressed::chr_D_sg_C_(Scaffold_1;HRSCAF_2)::sgE	arabica_cultivated__vs__arabica_introgressed	chr_D_sg_E_(Scaffold_2;HRSCAF_3)	4e	gene-LOC113741396	LOC113741396	LOC113741396	protein_coding	CASP-like protein 4A3
arabica_cultivated__vs__arabica_introgressed::chr_D_sg_C_(Scaffold_1;HRSCAF_2)::sgE	arabica_cultivated__vs__arabica_introgressed	chr_D_sg_E_(Scaffold_2;HRSCAF_3)	4e	gene-LOC113742312	LOC113742312	LOC113742312	protein_coding	protein EXECUTER 2%2C chloroplastic
arabica_cultivated__vs__arabica_introgressed::chr_D_sg_C_(Scaffold_1;HRSCAF_2)::sgE	arabica_cultivated__vs__arabica_introgressed	chr_D_sg_E_(Scaffold_2;HRSCAF_3)	4e	gene-LOC113741889	LOC113741889	LOC113741889	protein_coding	uncharacterized LOC113741889
arabica_cultivated__vs__arabica_introgressed::chr_D_sg_C_(Scaffold_1;HRSCAF_2)::sgE	arabica_cultivated__vs__arabica_introgressed	chr_D_sg_E_(Scaffold_2;HRSCAF_3)	4e	gene-LOC113740807	LOC113740807	LOC113740807	protein_coding	uncharacterized LOC113740807
arabica_cultivated__vs__arabica_introgressed::chr_D_sg_C_(Scaffold_1;HRSCAF_2)::sgE	arabica_cultivated__vs__arabica_introgressed	chr_D_sg_E_(Scaffold_2;HRSCAF_3)	4e	gene-LOC113740808	LOC113740808	LOC113740808	protein_coding	uncharacterized LOC113740808
arabica_cultivated__vs__arabica_introgressed::chr_D_sg_C_(Scaffold_1;HRSCAF_2)::sgE	arabica_cultivated__vs__arabica_introgressed	chr_D_sg_E_(Scaffold_2;HRSCAF_3)	4e	gene-LOC113740810	LOC113740810	LOC113740810	protein_coding	probable serine/threonine-protein kinase PIX13	kinase_signaling
arabica_cultivated__vs__arabica_introgressed::chr_D_sg_C_(Scaffold_1;HRSCAF_2)::sgE	arabica_cultivated__vs__arabica_introgressed	chr_D_sg_E_(Scaffold_2;HRSCAF_3)	4e	gene-LOC113742580	LOC113742580	LOC113742580	protein_coding	uncharacterized LOC113742580
arabica_cultivated__vs__arabica_introgressed::chr_D_sg_C_(Scaffold_1;HRSCAF_2)::sgE	arabica_cultivated__vs__arabica_introgressed	chr_D_sg_E_(Scaffold_2;HRSCAF_3)	4e	gene-LOC113742704	LOC113742704	LOC113742704	protein_coding	E3 ubiquitin-protein ligase SIS3
arabica_cultivated__vs__arabica_introgressed::chr_D_sg_C_(Scaffold_1;HRSCAF_2)::sgE	arabica_cultivated__vs__arabica_introgressed	chr_D_sg_E_(Scaffold_2;HRSCAF_3)	4e	gene-LOC113741700	LOC113741700	LOC113741700	protein_coding	uncharacterized LOC113741700
arabica_cultivated__vs__arabica_introgressed::chr_D_sg_C_(Scaffold_1;HRSCAF_2)::sgE	arabica_cultivated__vs__arabica_introgressed	chr_D_sg_E_(Scaffold_2;HRSCAF_3)	4e	gene-LOC113742076	LOC113742076	LOC113742076	protein_coding	polygalacturonase 1 beta-like protein 2
arabica_cultivated__vs__arabica_introgressed::chr_D_sg_C_(Scaffold_1;HRSCAF_2)::sgE	arabica_cultivated__vs__arabica_introgressed	chr_D_sg_E_(Scaffold_2;HRSCAF_3)	4e	gene-LOC140005721	LOC140005721	LOC140005721	lncRNA	uncharacterized LOC140005721
arabica_cultivated__vs__arabica_introgressed::chr_D_sg_C_(Scaffold_1;HRSCAF_2)::sgE	arabica_cultivated__vs__arabica_introgressed	chr_D_sg_E_(Scaffold_2;HRSCAF_3)	4e	gene-LOC113736699	LOC113736699	LOC113736699	protein_coding	uncharacterized LOC113736699
arabica_cultivated__vs__arabica_introgressed::chr_D_sg_C_(Scaffold_1;HRSCAF_2)::sgE	arabica_cultivated__vs__arabica_introgressed	chr_D_sg_E_(Scaffold_2;HRSCAF_3)	4e	gene-LOC113740813	LOC113740813	LOC113740813	protein_coding	transcription factor bHLH162-like	transcriptional_regulation
arabica_cultivated__vs__arabica_introgressed::chr_D_sg_C_(Scaffold_1;HRSCAF_2)::sgE	arabica_cultivated__vs__arabica_introgressed	chr_D_sg_E_(Scaffold_2;HRSCAF_3)	4e	gene-LOC113742909	LOC113742909	LOC113742909	protein_coding	calmodulin-binding transcription activator 3-like	kinase_signaling
arabica_cultivated__vs__arabica_introgressed::chr_D_sg_C_(Scaffold_1;HRSCAF_2)::sgE	arabica_cultivated__vs__arabica_introgressed	chr_D_sg_E_(Scaffold_2;HRSCAF_3)	4e	gene-LOC140005722	LOC140005722	LOC140005722	protein_coding	transcription factor bHLH162-like	transcriptional_regulation
arabica_cultivated__vs__arabica_introgressed::chr_D_sg_C_(Scaffold_1;HRSCAF_2)::sgE	arabica_cultivated__vs__arabica_introgressed	chr_D_sg_E_(Scaffold_2;HRSCAF_3)	4e	gene-LOC113741267	LOC113741267	LOC113741267	protein_coding	transcription factor bHLH162	transcriptional_regulation
arabica_cultivated__vs__arabica_introgressed::chr_D_sg_C_(Scaffold_1;HRSCAF_2)::sgE	arabica_cultivated__vs__arabica_introgressed	chr_D_sg_E_(Scaffold_2;HRSCAF_3)	4e	gene-LOC113741953	LOC113741953	LOC113741953	protein_coding	transcription factor bHLH162-like	transcriptional_regulation
arabica_cultivated__vs__arabica_introgressed::chr_D_sg_C_(Scaffold_1;HRSCAF_2)::sgE	arabica_cultivated__vs__arabica_introgressed	chr_D_sg_E_(Scaffold_2;HRSCAF_3)	4e	gene-LOC140005484	LOC140005484	LOC140005484	protein_coding	secreted RxLR effector protein 161-like
arabica_cultivated__vs__arabica_introgressed::chr_D_sg_C_(Scaffold_1;HRSCAF_2)::sgE	arabica_cultivated__vs__arabica_introgressed	chr_D_sg_E_(Scaffold_2;HRSCAF_3)	4e	gene-LOC140006067	LOC140006067	LOC140006067	lncRNA	uncharacterized LOC140006067
arabica_cultivated__vs__arabica_introgressed::chr_D_sg_C_(Scaffold_1;HRSCAF_2)::sgE	arabica_cultivated__vs__arabica_introgressed	chr_D_sg_E_(Scaffold_2;HRSCAF_3)	4e	gene-LOC140005485	LOC140005485	LOC140005485	protein_coding	uncharacterized LOC140005485
arabica_cultivated__vs__arabica_introgressed::chr_D_sg_C_(Scaffold_1;HRSCAF_2)::sgE	arabica_cultivated__vs__arabica_introgressed	chr_D_sg_E_(Scaffold_2;HRSCAF_3)	4e	gene-LOC113742637	LOC113742637	LOC113742637	protein_coding	serine/threonine-protein kinase 52	kinase_signaling
arabica_cultivated__vs__arabica_introgressed::chr_D_sg_C_(Scaffold_1;HRSCAF_2)::sgE	arabica_cultivated__vs__arabica_introgressed	chr_D_sg_E_(Scaffold_2;HRSCAF_3)	4e	gene-LOC113740815	LOC113740815	LOC113740815	protein_coding	bidirectional sugar transporter SWEET5-like	transport_membrane
arabica_cultivated__vs__arabica_introgressed::chr_D_sg_C_(Scaffold_1;HRSCAF_2)::sgE	arabica_cultivated__vs__arabica_introgressed	chr_D_sg_E_(Scaffold_2;HRSCAF_3)	4e	gene-LOC113741793	LOC113741793	LOC113741793	protein_coding	bidirectional sugar transporter SWEET5-like	transport_membrane
arabica_cultivated__vs__arabica_introgressed::chr_D_sg_C_(Scaffold_1;HRSCAF_2)::sgE	arabica_cultivated__vs__arabica_introgressed	chr_D_sg_E_(Scaffold_2;HRSCAF_3)	4e	gene-LOC140005486	LOC140005486	LOC140005486	protein_coding	uncharacterized LOC140005486
arabica_cultivated__vs__arabica_introgressed::chr_D_sg_C_(Scaffold_1;HRSCAF_2)::sgE	arabica_cultivated__vs__arabica_introgressed	chr_D_sg_E_(Scaffold_2;HRSCAF_3)	4e	gene-LOC113740819	LOC113740819	LOC113740819	protein_coding	putative RING-H2 finger protein ATL36
arabica_cultivated__vs__arabica_introgressed::chr_D_sg_C_(Scaffold_1;HRSCAF_2)::sgE	arabica_cultivated__vs__arabica_introgressed	chr_D_sg_E_(Scaffold_2;HRSCAF_3)	4e	gene-LOC113740820	LOC113740820	LOC113740820	protein_coding	UDP-glycosyltransferase 90A1-like
arabica_cultivated__vs__arabica_introgressed::chr_D_sg_C_(Scaffold_1;HRSCAF_2)::sgE	arabica_cultivated__vs__arabica_introgressed	chr_D_sg_E_(Scaffold_2;HRSCAF_3)	4e	gene-LOC113740821	LOC113740821	LOC113740821	protein_coding	uncharacterized mitochondrial protein AtMg00310-like
arabica_cultivated__vs__arabica_introgressed::chr_D_sg_C_(Scaffold_1;HRSCAF_2)::sgE	arabica_cultivated__vs__arabica_introgressed	chr_D_sg_E_(Scaffold_2;HRSCAF_3)	4e	gene-LOC140005487	LOC140005487	LOC140005487	protein_coding	uncharacterized LOC140005487
arabica_cultivated__vs__arabica_introgressed::chr_D_sg_C_(Scaffold_1;HRSCAF_2)::sgE	arabica_cultivated__vs__arabica_introgressed	chr_D_sg_E_(Scaffold_2;HRSCAF_3)	4e	gene-LOC113740824	LOC113740824	LOC113740824	protein_coding	uncharacterized LOC113740824
arabica_cultivated__vs__arabica_introgressed::chr_D_sg_C_(Scaffold_1;HRSCAF_2)::sgE	arabica_cultivated__vs__arabica_introgressed	chr_D_sg_E_(Scaffold_2;HRSCAF_3)	4e	gene-LOC140005488	LOC140005488	LOC140005488	protein_coding	uncharacterized LOC140005488
arabica_cultivated__vs__arabica_introgressed::chr_D_sg_C_(Scaffold_1;HRSCAF_2)::sgE	arabica_cultivated__vs__arabica_introgressed	chr_D_sg_E_(Scaffold_2;HRSCAF_3)	4e	gene-LOC113743141	LOC113743141	LOC113743141	snoRNA	small nucleolar RNA R71
arabica_cultivated__vs__arabica_introgressed::chr_D_sg_C_(Scaffold_1;HRSCAF_2)::sgE	arabica_cultivated__vs__arabica_introgressed	chr_D_sg_E_(Scaffold_2;HRSCAF_3)	4e	gene-LOC113740825	LOC113740825	LOC113740825	protein_coding	UDP-glycosyltransferase 90A1-like
arabica_cultivated__vs__arabica_introgressed::chr_D_sg_C_(Scaffold_1;HRSCAF_2)::sgE	arabica_cultivated__vs__arabica_introgressed	chr_D_sg_E_(Scaffold_2;HRSCAF_3)	4e	gene-LOC113740827	LOC113740827	LOC113740827	protein_coding	UDP-glycosyltransferase 90A1-like
arabica_cultivated__vs__arabica_introgressed::chr_D_sg_C_(Scaffold_1;HRSCAF_2)::sgE	arabica_cultivated__vs__arabica_introgressed	chr_D_sg_E_(Scaffold_2;HRSCAF_3)	4e	gene-LOC113740828	LOC113740828	LOC113740828	protein_coding	protein FAR1-RELATED SEQUENCE 5-like
arabica_cultivated__vs__arabica_introgressed::chr_D_sg_C_(Scaffold_1;HRSCAF_2)::sgE	arabica_cultivated__vs__arabica_introgressed	chr_D_sg_E_(Scaffold_2;HRSCAF_3)	4e	gene-LOC113740829	LOC113740829	LOC113740829	protein_coding	uncharacterized LOC113740829
arabica_cultivated__vs__arabica_introgressed::chr_D_sg_C_(Scaffold_1;HRSCAF_2)::sgE	arabica_cultivated__vs__arabica_introgressed	chr_D_sg_E_(Scaffold_2;HRSCAF_3)	4e	gene-LOC140006068	LOC140006068	LOC140006068	lncRNA	uncharacterized LOC140006068
arabica_cultivated__vs__arabica_introgressed::chr_D_sg_C_(Scaffold_1;HRSCAF_2)::sgE	arabica_cultivated__vs__arabica_introgressed	chr_D_sg_E_(Scaffold_2;HRSCAF_3)	4e	gene-LOC140005489	LOC140005489	LOC140005489	protein_coding	uncharacterized LOC140005489
arabica_cultivated__vs__arabica_introgressed::chr_D_sg_C_(Scaffold_1;HRSCAF_2)::sgE	arabica_cultivated__vs__arabica_introgressed	chr_D_sg_E_(Scaffold_2;HRSCAF_3)	4e	gene-LOC140006069	LOC140006069	LOC140006069	lncRNA	uncharacterized LOC140006069
arabica_cultivated__vs__arabica_introgressed::chr_D_sg_C_(Scaffold_1;HRSCAF_2)::sgE	arabica_cultivated__vs__arabica_introgressed	chr_D_sg_E_(Scaffold_2;HRSCAF_3)	4e	gene-LOC140005490	LOC140005490	LOC140005490	protein_coding	zinc finger BED domain-containing protein RICESLEEPER 2-like
arabica_cultivated__vs__arabica_introgressed::chr_D_sg_C_(Scaffold_1;HRSCAF_2)::sgE	arabica_cultivated__vs__arabica_introgressed	chr_D_sg_E_(Scaffold_2;HRSCAF_3)	4e	gene-LOC113742336	LOC113742336	LOC113742336	protein_coding	gibberellin 3-beta-dioxygenase 1-like
arabica_cultivated__vs__arabica_introgressed::chr_D_sg_C_(Scaffold_1;HRSCAF_2)::sgE	arabica_cultivated__vs__arabica_introgressed	chr_D_sg_E_(Scaffold_2;HRSCAF_3)	4e	gene-LOC113740832	LOC113740832	LOC113740832	protein_coding	UDP-glycosyltransferase 90A1-like
arabica_cultivated__vs__arabica_introgressed::chr_D_sg_C_(Scaffold_1;HRSCAF_2)::sgE	arabica_cultivated__vs__arabica_introgressed	chr_D_sg_E_(Scaffold_2;HRSCAF_3)	4e	gene-LOC113742994	LOC113742994	LOC113742994	protein_coding	protein DELETION OF SUV3 SUPPRESSOR 1(I)-like
arabica_cultivated__vs__arabica_introgressed::chr_D_sg_C_(Scaffold_1;HRSCAF_2)::sgE	arabica_cultivated__vs__arabica_introgressed	chr_D_sg_E_(Scaffold_2;HRSCAF_3)	4e	gene-LOC113743091	LOC113743091	LOC113743091	snoRNA	small nucleolar RNA snoR145
arabica_cultivated__vs__arabica_introgressed::chr_D_sg_C_(Scaffold_1;HRSCAF_2)::sgE	arabica_cultivated__vs__arabica_introgressed	chr_D_sg_E_(Scaffold_2;HRSCAF_3)	4e	gene-LOC113743093	LOC113743093	LOC113743093	snoRNA	small nucleolar RNA snoR145
arabica_cultivated__vs__arabica_introgressed::chr_D_sg_C_(Scaffold_1;HRSCAF_2)::sgE	arabica_cultivated__vs__arabica_introgressed	chr_D_sg_E_(Scaffold_2;HRSCAF_3)	4e	gene-LOC113743092	LOC113743092	LOC113743092	snoRNA	small nucleolar RNA snoR145
arabica_cultivated__vs__arabica_introgressed::chr_D_sg_C_(Scaffold_1;HRSCAF_2)::sgE	arabica_cultivated__vs__arabica_introgressed	chr_D_sg_E_(Scaffold_2;HRSCAF_3)	4e	gene-LOC113742083	LOC113742083	LOC113742083	protein_coding	U-box domain-containing protein 19-like
arabica_cultivated__vs__arabica_introgressed::chr_D_sg_C_(Scaffold_1;HRSCAF_2)::sgE	arabica_cultivated__vs__arabica_introgressed	chr_D_sg_E_(Scaffold_2;HRSCAF_3)	4e	gene-LOC113742365	LOC113742365	LOC113742365	protein_coding	benzaldehyde dehydrogenase%2C mitochondrial-like
arabica_cultivated__vs__arabica_introgressed::chr_D_sg_C_(Scaffold_1;HRSCAF_2)::sgE	arabica_cultivated__vs__arabica_introgressed	chr_D_sg_E_(Scaffold_2;HRSCAF_3)	4e	gene-LOC113742927	LOC113742927	LOC113742927	protein_coding	probable cyclic nucleotide-gated ion channel 16	transport_membrane
arabica_cultivated__vs__arabica_introgressed::chr_D_sg_C_(Scaffold_1;HRSCAF_2)::sgE	arabica_cultivated__vs__arabica_introgressed	chr_D_sg_E_(Scaffold_2;HRSCAF_3)	4e	gene-LOC113742023	LOC113742023	LOC113742023	protein_coding	uncharacterized LOC113742023
arabica_cultivated__vs__arabica_introgressed::chr_D_sg_C_(Scaffold_1;HRSCAF_2)::sgE	arabica_cultivated__vs__arabica_introgressed	chr_D_sg_E_(Scaffold_2;HRSCAF_3)	4e	gene-LOC140005723	LOC140005723	LOC140005723	lncRNA	uncharacterized LOC140005723
arabica_cultivated__vs__arabica_introgressed::chr_D_sg_C_(Scaffold_1;HRSCAF_2)::sgE	arabica_cultivated__vs__arabica_introgressed	chr_D_sg_E_(Scaffold_2;HRSCAF_3)	4e	gene-LOC113741606	LOC113741606	LOC113741606	protein_coding	uncharacterized LOC113741606
arabica_cultivated__vs__arabica_introgressed::chr_D_sg_C_(Scaffold_1;HRSCAF_2)::sgE	arabica_cultivated__vs__arabica_introgressed	chr_D_sg_E_(Scaffold_2;HRSCAF_3)	4e	gene-LOC113742879	LOC113742879	LOC113742879	protein_coding	RNA-dependent RNA polymerase 2
arabica_cultivated__vs__arabica_introgressed::chr_D_sg_C_(Scaffold_1;HRSCAF_2)::sgE	arabica_cultivated__vs__arabica_introgressed	chr_D_sg_E_(Scaffold_2;HRSCAF_3)	4e	gene-LOC140005492	LOC140005492	LOC140005492	protein_coding	uncharacterized LOC140005492
arabica_cultivated__vs__arabica_introgressed::chr_D_sg_C_(Scaffold_1;HRSCAF_2)::sgE	arabica_cultivated__vs__arabica_introgressed	chr_D_sg_E_(Scaffold_2;HRSCAF_3)	4e	gene-LOC113740833	LOC113740833	LOC113740833	protein_coding	probable (S)-N-methylcoclaurine 3'-hydroxylase isozyme 2
arabica_cultivated__vs__arabica_introgressed::chr_D_sg_C_(Scaffold_1;HRSCAF_2)::sgE	arabica_cultivated__vs__arabica_introgressed	chr_D_sg_E_(Scaffold_2;HRSCAF_3)	4e	gene-LOC113742069	LOC113742069	LOC113742069	protein_coding	probable (S)-N-methylcoclaurine 3'-hydroxylase isozyme 2
arabica_cultivated__vs__arabica_introgressed::chr_D_sg_C_(Scaffold_1;HRSCAF_2)::sgE	arabica_cultivated__vs__arabica_introgressed	chr_D_sg_E_(Scaffold_2;HRSCAF_3)	4e	gene-LOC140005812	LOC140005812	LOC140005812	protein_coding	uncharacterized LOC140005812
arabica_cultivated__vs__arabica_introgressed::chr_D_sg_C_(Scaffold_1;HRSCAF_2)::sgE	arabica_cultivated__vs__arabica_introgressed	chr_D_sg_E_(Scaffold_2;HRSCAF_3)	4e	gene-LOC140005493	LOC140005493	LOC140005493	protein_coding	uncharacterized LOC140005493
arabica_cultivated__vs__arabica_introgressed::chr_D_sg_C_(Scaffold_1;HRSCAF_2)::sgE	arabica_cultivated__vs__arabica_introgressed	chr_D_sg_E_(Scaffold_2;HRSCAF_3)	4e	gene-LOC113742176	LOC113742176	LOC113742176	protein_coding	2-isopropylmalate synthase A
arabica_cultivated__vs__arabica_introgressed::chr_D_sg_C_(Scaffold_1;HRSCAF_2)::sgE	arabica_cultivated__vs__arabica_introgressed	chr_D_sg_E_(Scaffold_2;HRSCAF_3)	4e	gene-LOC113741859	LOC113741859	LOC113741859	lncRNA	uncharacterized LOC113741859
arabica_cultivated__vs__arabica_introgressed::chr_D_sg_C_(Scaffold_1;HRSCAF_2)::sgE	arabica_cultivated__vs__arabica_introgressed	chr_D_sg_E_(Scaffold_2;HRSCAF_3)	4e	gene-LOC140005724	LOC140005724	LOC140005724	lncRNA	uncharacterized LOC140005724
arabica_cultivated__vs__arabica_introgressed::chr_D_sg_C_(Scaffold_1;HRSCAF_2)::sgE	arabica_cultivated__vs__arabica_introgressed	chr_D_sg_E_(Scaffold_2;HRSCAF_3)	4e	gene-LOC140005494	LOC140005494	LOC140005494	protein_coding	uncharacterized LOC140005494
arabica_cultivated__vs__arabica_introgressed::chr_D_sg_C_(Scaffold_1;HRSCAF_2)::sgE	arabica_cultivated__vs__arabica_introgressed	chr_D_sg_E_(Scaffold_2;HRSCAF_3)	4e	gene-LOC113740837	LOC113740837	LOC113740837	protein_coding	UDP-glycosyltransferase 91D2-like
arabica_cultivated__vs__arabica_introgressed::chr_D_sg_C_(Scaffold_1;HRSCAF_2)::sgE	arabica_cultivated__vs__arabica_introgressed	chr_D_sg_E_(Scaffold_2;HRSCAF_3)	4e	gene-LOC113743129	LOC113743129	LOC113743129	snoRNA	small nucleolar RNA R71
arabica_cultivated__vs__arabica_introgressed::chr_D_sg_C_(Scaffold_1;HRSCAF_2)::sgE	arabica_cultivated__vs__arabica_introgressed	chr_D_sg_E_(Scaffold_2;HRSCAF_3)	4e	gene-LOC113741164	LOC113741164	LOC113741164	protein_coding	RING-H2 finger protein ATL46-like
arabica_cultivated__vs__arabica_introgressed::chr_D_sg_C_(Scaffold_1;HRSCAF_2)::sgE	arabica_cultivated__vs__arabica_introgressed	chr_D_sg_E_(Scaffold_2;HRSCAF_3)	4e	gene-LOC113741552	LOC113741552	LOC113741552	protein_coding	probable inactive receptor kinase At2g26730	defense_receptor, kinase_signaling
arabica_cultivated__vs__arabica_introgressed::chr_D_sg_C_(Scaffold_1;HRSCAF_2)::sgE	arabica_cultivated__vs__arabica_introgressed	chr_D_sg_E_(Scaffold_2;HRSCAF_3)	4e	gene-LOC113741205	LOC113741205	LOC113741205	protein_coding	ubiquitin-conjugating enzyme E2 5
arabica_cultivated__vs__arabica_introgressed::chr_D_sg_C_(Scaffold_1;HRSCAF_2)::sgE	arabica_cultivated__vs__arabica_introgressed	chr_D_sg_E_(Scaffold_2;HRSCAF_3)	4e	gene-LOC140005725	LOC140005725	LOC140005725	lncRNA	uncharacterized LOC140005725
arabica_cultivated__vs__arabica_introgressed::chr_D_sg_C_(Scaffold_1;HRSCAF_2)::sgE	arabica_cultivated__vs__arabica_introgressed	chr_D_sg_E_(Scaffold_2;HRSCAF_3)	4e	gene-LOC140005726	LOC140005726	LOC140005726	lncRNA	uncharacterized LOC140005726
arabica_cultivated__vs__arabica_introgressed::chr_D_sg_C_(Scaffold_1;HRSCAF_2)::sgE	arabica_cultivated__vs__arabica_introgressed	chr_D_sg_E_(Scaffold_2;HRSCAF_3)	4e	gene-LOC113741538	LOC113741538	LOC113741538	lncRNA	uncharacterized LOC113741538
arabica_cultivated__vs__arabica_introgressed::chr_D_sg_C_(Scaffold_1;HRSCAF_2)::sgE	arabica_cultivated__vs__arabica_introgressed	chr_D_sg_E_(Scaffold_2;HRSCAF_3)	4e	gene-LOC140006073	LOC140006073	LOC140006073	protein_coding	protease Do-like 9
arabica_cultivated__vs__arabica_introgressed::chr_D_sg_C_(Scaffold_1;HRSCAF_2)::sgE	arabica_cultivated__vs__arabica_introgressed	chr_D_sg_E_(Scaffold_2;HRSCAF_3)	4e	gene-LOC113741682	LOC113741682	LOC113741682	protein_coding	alpha-N-acetylglucosaminidase
arabica_cultivated__vs__arabica_introgressed::chr_D_sg_C_(Scaffold_1;HRSCAF_2)::sgE	arabica_cultivated__vs__arabica_introgressed	chr_D_sg_E_(Scaffold_2;HRSCAF_3)	4e	gene-LOC140005495	LOC140005495	LOC140005495	protein_coding	uncharacterized LOC140005495
arabica_cultivated__vs__arabica_introgressed::chr_D_sg_C_(Scaffold_1;HRSCAF_2)::sgE	arabica_cultivated__vs__arabica_introgressed	chr_D_sg_E_(Scaffold_2;HRSCAF_3)	4e	gene-LOC113741987	LOC113741987	LOC113741987	protein_coding	rac-like GTP-binding protein 3
arabica_cultivated__vs__arabica_introgressed::chr_D_sg_C_(Scaffold_1;HRSCAF_2)::sgE	arabica_cultivated__vs__arabica_introgressed	chr_D_sg_E_(Scaffold_2;HRSCAF_3)	4e	gene-LOC113741986	LOC113741986	LOC113741986	protein_coding	uncharacterized LOC113741986
arabica_cultivated__vs__arabica_introgressed::chr_D_sg_C_(Scaffold_1;HRSCAF_2)::sgE	arabica_cultivated__vs__arabica_introgressed	chr_D_sg_E_(Scaffold_2;HRSCAF_3)	4e	gene-LOC113742813	LOC113742813	LOC113742813	protein_coding	proteasome subunit alpha type-2-like
arabica_cultivated__vs__arabica_introgressed::chr_D_sg_C_(Scaffold_1;HRSCAF_2)::sgE	arabica_cultivated__vs__arabica_introgressed	chr_D_sg_E_(Scaffold_2;HRSCAF_3)	4e	gene-LOC113741720	LOC113741720	LOC113741720	protein_coding	nucleobase-ascorbate transporter 6	transport_membrane
arabica_cultivated__vs__arabica_introgressed::chr_D_sg_C_(Scaffold_1;HRSCAF_2)::sgE	arabica_cultivated__vs__arabica_introgressed	chr_D_sg_E_(Scaffold_2;HRSCAF_3)	4e	gene-LOC113741385	LOC113741385	LOC113741385	protein_coding	uncharacterized LOC113741385
arabica_cultivated__vs__arabica_introgressed::chr_D_sg_C_(Scaffold_1;HRSCAF_2)::sgE	arabica_cultivated__vs__arabica_introgressed	chr_D_sg_E_(Scaffold_2;HRSCAF_3)	4e	gene-LOC113741970	LOC113741970	LOC113741970	protein_coding	pentatricopeptide repeat-containing protein At3g62890-like
arabica_cultivated__vs__arabica_introgressed::chr_D_sg_C_(Scaffold_1;HRSCAF_2)::sgE	arabica_cultivated__vs__arabica_introgressed	chr_D_sg_E_(Scaffold_2;HRSCAF_3)	4e	gene-LOC113742576	LOC113742576	LOC113742576	protein_coding	SUPPRESSOR OF ABI3-5-like
arabica_cultivated__vs__arabica_introgressed::chr_D_sg_C_(Scaffold_1;HRSCAF_2)::sgE	arabica_cultivated__vs__arabica_introgressed	chr_D_sg_E_(Scaffold_2;HRSCAF_3)	4e	gene-LOC113740839	LOC113740839	LOC113740839	protein_coding	ananain-like
arabica_cultivated__vs__arabica_introgressed::chr_D_sg_C_(Scaffold_1;HRSCAF_2)::sgE	arabica_cultivated__vs__arabica_introgressed	chr_D_sg_E_(Scaffold_2;HRSCAF_3)	4e	gene-LOC113740840	LOC113740840	LOC113740840	protein_coding	beta-fructofuranosidase%2C insoluble isoenzyme 1-like
arabica_cultivated__vs__arabica_introgressed::chr_D_sg_C_(Scaffold_1;HRSCAF_2)::sgE	arabica_cultivated__vs__arabica_introgressed	chr_D_sg_E_(Scaffold_2;HRSCAF_3)	4e	gene-LOC113740841	LOC113740841	LOC113740841	protein_coding	protein ALP1-like
arabica_cultivated__vs__arabica_introgressed::chr_D_sg_C_(Scaffold_1;HRSCAF_2)::sgE	arabica_cultivated__vs__arabica_introgressed	chr_D_sg_E_(Scaffold_2;HRSCAF_3)	4e	gene-LOC113741945	LOC113741945	LOC113741945	protein_coding	LIM domain-containing protein WLIM1-like
arabica_cultivated__vs__arabica_introgressed::chr_D_sg_C_(Scaffold_1;HRSCAF_2)::sgE	arabica_cultivated__vs__arabica_introgressed	chr_D_sg_E_(Scaffold_2;HRSCAF_3)	4e	gene-LOC113741341	LOC113741341	LOC113741341	protein_coding	succinate dehydrogenase subunit 7B%2C mitochondrial-like
arabica_cultivated__vs__arabica_introgressed::chr_D_sg_C_(Scaffold_1;HRSCAF_2)::sgE	arabica_cultivated__vs__arabica_introgressed	chr_D_sg_E_(Scaffold_2;HRSCAF_3)	4e	gene-LOC113743107	LOC113743107	LOC113743107	snoRNA	small nucleolar RNA R71
arabica_cultivated__vs__arabica_introgressed::chr_D_sg_C_(Scaffold_1;HRSCAF_2)::sgE	arabica_cultivated__vs__arabica_introgressed	chr_D_sg_E_(Scaffold_2;HRSCAF_3)	4e	gene-LOC140006074	LOC140006074	LOC140006074	protein_coding	uncharacterized LOC140006074
arabica_cultivated__vs__arabica_introgressed::chr_D_sg_C_(Scaffold_1;HRSCAF_2)::sgE	arabica_cultivated__vs__arabica_introgressed	chr_D_sg_E_(Scaffold_2;HRSCAF_3)	4e	gene-LOC140005496	LOC140005496	LOC140005496	protein_coding	uncharacterized LOC140005496
arabica_cultivated__vs__arabica_introgressed::chr_D_sg_C_(Scaffold_1;HRSCAF_2)::sgE	arabica_cultivated__vs__arabica_introgressed	chr_D_sg_E_(Scaffold_2;HRSCAF_3)	4e	gene-LOC140005498	LOC140005498	LOC140005498	protein_coding	uncharacterized LOC140005498
arabica_cultivated__vs__arabica_introgressed::chr_D_sg_C_(Scaffold_1;HRSCAF_2)::sgE	arabica_cultivated__vs__arabica_introgressed	chr_D_sg_E_(Scaffold_2;HRSCAF_3)	4e	gene-LOC140006075	LOC140006075	LOC140006075	protein_coding	uncharacterized LOC140006075
arabica_cultivated__vs__arabica_introgressed::chr_D_sg_C_(Scaffold_1;HRSCAF_2)::sgE	arabica_cultivated__vs__arabica_introgressed	chr_D_sg_E_(Scaffold_2;HRSCAF_3)	4e	gene-LOC140005499	LOC140005499	LOC140005499	protein_coding	uncharacterized LOC140005499
arabica_cultivated__vs__arabica_introgressed::chr_D_sg_C_(Scaffold_1;HRSCAF_2)::sgE	arabica_cultivated__vs__arabica_introgressed	chr_D_sg_E_(Scaffold_2;HRSCAF_3)	4e	gene-LOC140005500	LOC140005500	LOC140005500	protein_coding	uncharacterized LOC140005500
arabica_cultivated__vs__arabica_introgressed::chr_D_sg_C_(Scaffold_1;HRSCAF_2)::sgE	arabica_cultivated__vs__arabica_introgressed	chr_D_sg_E_(Scaffold_2;HRSCAF_3)	4e	gene-LOC140006076	LOC140006076	LOC140006076	lncRNA	uncharacterized LOC140006076
arabica_cultivated__vs__arabica_introgressed::chr_D_sg_C_(Scaffold_1;HRSCAF_2)::sgE	arabica_cultivated__vs__arabica_introgressed	chr_D_sg_E_(Scaffold_2;HRSCAF_3)	4e	gene-LOC113742768	LOC113742768	LOC113742768	protein_coding	uncharacterized protein At5g50100%2C chloroplastic
arabica_cultivated__vs__arabica_introgressed::chr_D_sg_C_(Scaffold_1;HRSCAF_2)::sgE	arabica_cultivated__vs__arabica_introgressed	chr_D_sg_E_(Scaffold_2;HRSCAF_3)	4e	gene-LOC113742767	LOC113742767	LOC113742767	protein_coding	calmodulin-binding protein 60 A	kinase_signaling
arabica_cultivated__vs__arabica_introgressed::chr_D_sg_C_(Scaffold_1;HRSCAF_2)::sgE	arabica_cultivated__vs__arabica_introgressed	chr_D_sg_E_(Scaffold_2;HRSCAF_3)	4e	gene-LOC113740843	LOC113740843	LOC113740843	protein_coding	uncharacterized mitochondrial protein AtMg00310-like
arabica_cultivated__vs__arabica_introgressed::chr_D_sg_C_(Scaffold_1;HRSCAF_2)::sgE	arabica_cultivated__vs__arabica_introgressed	chr_D_sg_E_(Scaffold_2;HRSCAF_3)	4e	gene-LOC113740844	LOC113740844	LOC113740844	protein_coding	uncharacterized LOC113740844
arabica_cultivated__vs__arabica_introgressed::chr_D_sg_C_(Scaffold_1;HRSCAF_2)::sgE	arabica_cultivated__vs__arabica_introgressed	chr_D_sg_E_(Scaffold_2;HRSCAF_3)	4e	gene-LOC140005501	LOC140005501	LOC140005501	protein_coding	uncharacterized LOC140005501
arabica_cultivated__vs__arabica_introgressed::chr_D_sg_C_(Scaffold_1;HRSCAF_2)::sgE	arabica_cultivated__vs__arabica_introgressed	chr_D_sg_E_(Scaffold_2;HRSCAF_3)	4e	gene-LOC113740846	LOC113740846	LOC113740846	protein_coding	probable 2-oxoglutarate-dependent dioxygenase AOP1
arabica_cultivated__vs__arabica_introgressed::chr_D_sg_C_(Scaffold_1;HRSCAF_2)::sgE	arabica_cultivated__vs__arabica_introgressed	chr_D_sg_E_(Scaffold_2;HRSCAF_3)	4e	gene-LOC113743140	LOC113743140	LOC113743140	snoRNA	small nucleolar RNA R71
arabica_cultivated__vs__arabica_introgressed::chr_D_sg_C_(Scaffold_1;HRSCAF_2)::sgE	arabica_cultivated__vs__arabica_introgressed	chr_D_sg_E_(Scaffold_2;HRSCAF_3)	4e	gene-LOC113740848	LOC113740848	LOC113740848	protein_coding	uncharacterized LOC113740848
arabica_cultivated__vs__arabica_introgressed::chr_D_sg_C_(Scaffold_1;HRSCAF_2)::sgE	arabica_cultivated__vs__arabica_introgressed	chr_D_sg_E_(Scaffold_2;HRSCAF_3)	4e	gene-LOC113742104	LOC113742104	LOC113742104	protein_coding	calmodulin-binding protein 60 A	kinase_signaling
arabica_cultivated__vs__arabica_introgressed::chr_D_sg_C_(Scaffold_1;HRSCAF_2)::sgE	arabica_cultivated__vs__arabica_introgressed	chr_D_sg_E_(Scaffold_2;HRSCAF_3)	4e	gene-LOC113743136	LOC113743136	LOC113743136	snoRNA	small nucleolar RNA R71
arabica_cultivated__vs__arabica_introgressed::chr_D_sg_C_(Scaffold_1;HRSCAF_2)::sgE	arabica_cultivated__vs__arabica_introgressed	chr_D_sg_E_(Scaffold_2;HRSCAF_3)	4e	gene-LOC113743139	LOC113743139	LOC113743139	snoRNA	small nucleolar RNA R71
arabica_cultivated__vs__arabica_introgressed::chr_D_sg_C_(Scaffold_1;HRSCAF_2)::sgE	arabica_cultivated__vs__arabica_introgressed	chr_D_sg_E_(Scaffold_2;HRSCAF_3)	4e	gene-LOC140005502	LOC140005502	LOC140005502	protein_coding	uncharacterized LOC140005502
arabica_cultivated__vs__arabica_introgressed::chr_D_sg_C_(Scaffold_1;HRSCAF_2)::sgE	arabica_cultivated__vs__arabica_introgressed	chr_D_sg_E_(Scaffold_2;HRSCAF_3)	4e	gene-LOC140005727	LOC140005727	LOC140005727	lncRNA	uncharacterized LOC140005727
arabica_cultivated__vs__arabica_introgressed::chr_D_sg_C_(Scaffold_1;HRSCAF_2)::sgE	arabica_cultivated__vs__arabica_introgressed	chr_D_sg_E_(Scaffold_2;HRSCAF_3)	4e	gene-LOC113741219	LOC113741219	LOC113741219	protein_coding	uncharacterized LOC113741219
arabica_cultivated__vs__arabica_introgressed::chr_D_sg_C_(Scaffold_1;HRSCAF_2)::sgE	arabica_cultivated__vs__arabica_introgressed	chr_D_sg_E_(Scaffold_2;HRSCAF_3)	4e	gene-LOC113741218	LOC113741218	LOC113741218	protein_coding	ADP%2CATP carrier protein ER-ANT1-like
arabica_cultivated__vs__arabica_introgressed::chr_D_sg_C_(Scaffold_1;HRSCAF_2)::sgE	arabica_cultivated__vs__arabica_introgressed	chr_D_sg_E_(Scaffold_2;HRSCAF_3)	4e	gene-LOC113741974	LOC113741974	LOC113741974	protein_coding	calmodulin-binding protein 60 A-like	kinase_signaling
arabica_cultivated__vs__arabica_introgressed::chr_D_sg_C_(Scaffold_1;HRSCAF_2)::sgE	arabica_cultivated__vs__arabica_introgressed	chr_D_sg_E_(Scaffold_2;HRSCAF_3)	4e	gene-LOC113741975	LOC113741975	LOC113741975	lncRNA	uncharacterized LOC113741975
arabica_cultivated__vs__arabica_introgressed::chr_D_sg_C_(Scaffold_1;HRSCAF_2)::sgE	arabica_cultivated__vs__arabica_introgressed	chr_D_sg_E_(Scaffold_2;HRSCAF_3)	4e	gene-LOC140006077	LOC140006077	LOC140006077	lncRNA	uncharacterized LOC140006077
arabica_cultivated__vs__arabica_introgressed::chr_D_sg_C_(Scaffold_1;HRSCAF_2)::sgE	arabica_cultivated__vs__arabica_introgressed	chr_D_sg_E_(Scaffold_2;HRSCAF_3)	4e	gene-LOC113741745	LOC113741745	LOC113741745	protein_coding	calmodulin-binding protein 60 A	kinase_signaling
arabica_cultivated__vs__arabica_introgressed::chr_D_sg_C_(Scaffold_1;HRSCAF_2)::sgE	arabica_cultivated__vs__arabica_introgressed	chr_D_sg_E_(Scaffold_2;HRSCAF_3)	4e	gene-LOC113741815	LOC113741815	LOC113741815	protein_coding	UDP-glycosyltransferase 74B1-like
arabica_cultivated__vs__arabica_introgressed::chr_D_sg_C_(Scaffold_1;HRSCAF_2)::sgE	arabica_cultivated__vs__arabica_introgressed	chr_D_sg_E_(Scaffold_2;HRSCAF_3)	4e	gene-LOC113742344	LOC113742344	LOC113742344	protein_coding	calmodulin-binding protein 60 A	kinase_signaling
arabica_cultivated__vs__arabica_introgressed::chr_D_sg_C_(Scaffold_1;HRSCAF_2)::sgE	arabica_cultivated__vs__arabica_introgressed	chr_D_sg_E_(Scaffold_2;HRSCAF_3)	4e	gene-LOC113741547	LOC113741547	LOC113741547	lncRNA	uncharacterized LOC113741547
arabica_cultivated__vs__arabica_introgressed::chr_D_sg_C_(Scaffold_1;HRSCAF_2)::sgE	arabica_cultivated__vs__arabica_introgressed	chr_D_sg_E_(Scaffold_2;HRSCAF_3)	4e	gene-LOC140005503	LOC140005503	LOC140005503	protein_coding	uncharacterized LOC140005503
arabica_cultivated__vs__arabica_introgressed::chr_D_sg_C_(Scaffold_1;HRSCAF_2)::sgE	arabica_cultivated__vs__arabica_introgressed	chr_D_sg_E_(Scaffold_2;HRSCAF_3)	4e	gene-LOC140005504	LOC140005504	LOC140005504	protein_coding	uncharacterized LOC140005504
arabica_cultivated__vs__arabica_introgressed::chr_D_sg_C_(Scaffold_1;HRSCAF_2)::sgE	arabica_cultivated__vs__arabica_introgressed	chr_D_sg_E_(Scaffold_2;HRSCAF_3)	4e	gene-LOC140005505	LOC140005505	LOC140005505	protein_coding	uncharacterized LOC140005505
arabica_cultivated__vs__arabica_introgressed::chr_D_sg_C_(Scaffold_1;HRSCAF_2)::sgE	arabica_cultivated__vs__arabica_introgressed	chr_D_sg_E_(Scaffold_2;HRSCAF_3)	4e	gene-LOC140005506	LOC140005506	LOC140005506	protein_coding	uncharacterized LOC140005506
arabica_cultivated__vs__arabica_introgressed::chr_D_sg_C_(Scaffold_1;HRSCAF_2)::sgE	arabica_cultivated__vs__arabica_introgressed	chr_D_sg_E_(Scaffold_2;HRSCAF_3)	4e	gene-LOC140005507	LOC140005507	LOC140005507	protein_coding	uncharacterized LOC140005507
arabica_cultivated__vs__arabica_introgressed::chr_D_sg_C_(Scaffold_1;HRSCAF_2)::sgE	arabica_cultivated__vs__arabica_introgressed	chr_D_sg_E_(Scaffold_2;HRSCAF_3)	4e	gene-LOC113740851	LOC113740851	LOC113740851	protein_coding	receptor kinase-like protein Xa21	defense_receptor, kinase_signaling
arabica_cultivated__vs__arabica_introgressed::chr_D_sg_C_(Scaffold_1;HRSCAF_2)::sgE	arabica_cultivated__vs__arabica_introgressed	chr_D_sg_E_(Scaffold_2;HRSCAF_3)	4e	gene-LOC113740852	LOC113740852	LOC113740852	protein_coding	uncharacterized LOC113740852
arabica_cultivated__vs__arabica_introgressed::chr_D_sg_C_(Scaffold_1;HRSCAF_2)::sgE	arabica_cultivated__vs__arabica_introgressed	chr_D_sg_E_(Scaffold_2;HRSCAF_3)	4e	gene-LOC140005509	LOC140005509	LOC140005509	protein_coding	uncharacterized LOC140005509
arabica_cultivated__vs__arabica_introgressed::chr_D_sg_C_(Scaffold_1;HRSCAF_2)::sgE	arabica_cultivated__vs__arabica_introgressed	chr_D_sg_E_(Scaffold_2;HRSCAF_3)	4e	gene-LOC113743132	LOC113743132	LOC113743132	snoRNA	small nucleolar RNA R71
arabica_cultivated__vs__arabica_introgressed::chr_D_sg_C_(Scaffold_1;HRSCAF_2)::sgE	arabica_cultivated__vs__arabica_introgressed	chr_D_sg_E_(Scaffold_2;HRSCAF_3)	4e	gene-LOC113740856	LOC113740856	LOC113740856	protein_coding	uncharacterized LOC113740856
arabica_cultivated__vs__arabica_introgressed::chr_D_sg_C_(Scaffold_1;HRSCAF_2)::sgE	arabica_cultivated__vs__arabica_introgressed	chr_D_sg_E_(Scaffold_2;HRSCAF_3)	4e	gene-LOC113741372	LOC113741372	LOC113741372	protein_coding	uncharacterized LOC113741372
arabica_cultivated__vs__arabica_introgressed::chr_D_sg_C_(Scaffold_1;HRSCAF_2)::sgE	arabica_cultivated__vs__arabica_introgressed	chr_D_sg_E_(Scaffold_2;HRSCAF_3)	4e	gene-LOC113740857	LOC113740857	LOC113740857	protein_coding	uncharacterized LOC113740857
arabica_cultivated__vs__arabica_introgressed::chr_D_sg_C_(Scaffold_1;HRSCAF_2)::sgE	arabica_cultivated__vs__arabica_introgressed	chr_D_sg_E_(Scaffold_2;HRSCAF_3)	4e	gene-LOC113742270	LOC113742270	LOC113742270	protein_coding	protein MOS2-like
arabica_cultivated__vs__arabica_introgressed::chr_D_sg_C_(Scaffold_1;HRSCAF_2)::sgE	arabica_cultivated__vs__arabica_introgressed	chr_D_sg_E_(Scaffold_2;HRSCAF_3)	4e	gene-LOC113742513	LOC113742513	LOC113742513	protein_coding	protein MOS2
arabica_cultivated__vs__arabica_introgressed::chr_D_sg_C_(Scaffold_1;HRSCAF_2)::sgE	arabica_cultivated__vs__arabica_introgressed	chr_D_sg_E_(Scaffold_2;HRSCAF_3)	4e	gene-LOC113740578	LOC113740578	LOC113740578	protein_coding	alpha-mannosidase I MNS5-like
arabica_cultivated__vs__arabica_introgressed::chr_D_sg_C_(Scaffold_1;HRSCAF_2)::sgE	arabica_cultivated__vs__arabica_introgressed	chr_D_sg_E_(Scaffold_2;HRSCAF_3)	4e	gene-LOC140005511	LOC140005511	LOC140005511	protein_coding	uncharacterized LOC140005511
arabica_cultivated__vs__arabica_introgressed::chr_D_sg_C_(Scaffold_1;HRSCAF_2)::sgE	arabica_cultivated__vs__arabica_introgressed	chr_D_sg_E_(Scaffold_2;HRSCAF_3)	4e	gene-LOC113740860	LOC113740860	LOC113740860	protein_coding	peroxidase 41-like
arabica_cultivated__vs__arabica_introgressed::chr_D_sg_C_(Scaffold_1;HRSCAF_2)::sgE	arabica_cultivated__vs__arabica_introgressed	chr_D_sg_E_(Scaffold_2;HRSCAF_3)	4e	gene-LOC113742918	LOC113742918	LOC113742918	protein_coding	putative DNA glycosylase At3g47830
arabica_cultivated__vs__arabica_introgressed::chr_D_sg_C_(Scaffold_1;HRSCAF_2)::sgE	arabica_cultivated__vs__arabica_introgressed	chr_D_sg_E_(Scaffold_2;HRSCAF_3)	4e	gene-LOC113707897	LOC113707897	LOC113707897	lncRNA	uncharacterized LOC113707897
arabica_cultivated__vs__arabica_introgressed::chr_D_sg_C_(Scaffold_1;HRSCAF_2)::sgE	arabica_cultivated__vs__arabica_introgressed	chr_D_sg_E_(Scaffold_2;HRSCAF_3)	4e	gene-LOC140005512	LOC140005512	LOC140005512	protein_coding	uncharacterized LOC140005512
arabica_cultivated__vs__arabica_introgressed::chr_D_sg_C_(Scaffold_1;HRSCAF_2)::sgE	arabica_cultivated__vs__arabica_introgressed	chr_D_sg_E_(Scaffold_2;HRSCAF_3)	4e	gene-LOC140005728	LOC140005728	LOC140005728	lncRNA	uncharacterized LOC140005728
arabica_cultivated__vs__arabica_introgressed::chr_D_sg_C_(Scaffold_1;HRSCAF_2)::sgE	arabica_cultivated__vs__arabica_introgressed	chr_D_sg_E_(Scaffold_2;HRSCAF_3)	4e	gene-LOC140005513	LOC140005513	LOC140005513	protein_coding	uncharacterized LOC140005513
arabica_cultivated__vs__arabica_introgressed::chr_D_sg_C_(Scaffold_1;HRSCAF_2)::sgE	arabica_cultivated__vs__arabica_introgressed	chr_D_sg_E_(Scaffold_2;HRSCAF_3)	4e	gene-LOC140006078	LOC140006078	LOC140006078	lncRNA	uncharacterized LOC140006078
arabica_cultivated__vs__arabica_introgressed::chr_D_sg_C_(Scaffold_1;HRSCAF_2)::sgE	arabica_cultivated__vs__arabica_introgressed	chr_D_sg_E_(Scaffold_2;HRSCAF_3)	4e	gene-LOC140005514	LOC140005514	LOC140005514	protein_coding	uncharacterized LOC140005514
arabica_cultivated__vs__arabica_introgressed::chr_D_sg_C_(Scaffold_1;HRSCAF_2)::sgE	arabica_cultivated__vs__arabica_introgressed	chr_D_sg_E_(Scaffold_2;HRSCAF_3)	4e	gene-LOC113741772	LOC113741772	LOC113741772	lncRNA	uncharacterized LOC113741772
arabica_cultivated__vs__arabica_introgressed::chr_D_sg_C_(Scaffold_1;HRSCAF_2)::sgE	arabica_cultivated__vs__arabica_introgressed	chr_D_sg_E_(Scaffold_2;HRSCAF_3)	4e	gene-LOC113743020	LOC113743020	LOC113743020	protein_coding	U-box domain-containing protein 40-like
arabica_cultivated__vs__arabica_introgressed::chr_D_sg_C_(Scaffold_1;HRSCAF_2)::sgE	arabica_cultivated__vs__arabica_introgressed	chr_D_sg_E_(Scaffold_2;HRSCAF_3)	4e	gene-LOC113740863	LOC113740863	LOC113740863	lncRNA	uncharacterized LOC113740863
arabica_cultivated__vs__arabica_introgressed::chr_D_sg_C_(Scaffold_1;HRSCAF_2)::sgE	arabica_cultivated__vs__arabica_introgressed	chr_D_sg_E_(Scaffold_2;HRSCAF_3)	4e	gene-LOC113740864	LOC113740864	LOC113740864	protein_coding	uncharacterized LOC113740864
arabica_cultivated__vs__arabica_introgressed::chr_D_sg_C_(Scaffold_1;HRSCAF_2)::sgE	arabica_cultivated__vs__arabica_introgressed	chr_D_sg_E_(Scaffold_2;HRSCAF_3)	4e	gene-LOC113742933	LOC113742933	LOC113742933	protein_coding	uncharacterized LOC113742933
arabica_cultivated__vs__arabica_introgressed::chr_D_sg_C_(Scaffold_1;HRSCAF_2)::sgE	arabica_cultivated__vs__arabica_introgressed	chr_D_sg_E_(Scaffold_2;HRSCAF_3)	4e	gene-LOC113742930	LOC113742930	LOC113742930	protein_coding	protein JINGUBANG-like
arabica_cultivated__vs__arabica_introgressed::chr_D_sg_C_(Scaffold_1;HRSCAF_2)::sgE	arabica_cultivated__vs__arabica_introgressed	chr_D_sg_E_(Scaffold_2;HRSCAF_3)	4e	gene-LOC113742876	LOC113742876	LOC113742876	protein_coding	pyridoxine/pyridoxamine 5'-phosphate oxidase 1%2C chloroplastic-like
arabica_cultivated__vs__arabica_introgressed::chr_D_sg_C_(Scaffold_1;HRSCAF_2)::sgE	arabica_cultivated__vs__arabica_introgressed	chr_D_sg_E_(Scaffold_2;HRSCAF_3)	4e	gene-LOC113740865	LOC113740865	LOC113740865	protein_coding	uncharacterized LOC113740865
arabica_cultivated__vs__arabica_introgressed::chr_D_sg_C_(Scaffold_1;HRSCAF_2)::sgE	arabica_cultivated__vs__arabica_introgressed	chr_D_sg_E_(Scaffold_2;HRSCAF_3)	4e	gene-LOC140005515	LOC140005515	LOC140005515	protein_coding	uncharacterized LOC140005515
arabica_cultivated__vs__arabica_introgressed::chr_D_sg_C_(Scaffold_1;HRSCAF_2)::sgE	arabica_cultivated__vs__arabica_introgressed	chr_D_sg_E_(Scaffold_2;HRSCAF_3)	4e	gene-LOC113741514	LOC113741514	LOC113741514	protein_coding	aminoaldehyde dehydrogenase 2%2C peroxisomal
arabica_cultivated__vs__arabica_introgressed::chr_D_sg_C_(Scaffold_1;HRSCAF_2)::sgE	arabica_cultivated__vs__arabica_introgressed	chr_D_sg_E_(Scaffold_2;HRSCAF_3)	4e	gene-LOC113742301	LOC113742301	LOC113742301	protein_coding	uncharacterized LOC113742301
arabica_cultivated__vs__arabica_introgressed::chr_D_sg_C_(Scaffold_1;HRSCAF_2)::sgE	arabica_cultivated__vs__arabica_introgressed	chr_D_sg_E_(Scaffold_2;HRSCAF_3)	4e	gene-LOC113740866	LOC113740866	LOC113740866	protein_coding	uncharacterized LOC113740866
arabica_cultivated__vs__arabica_introgressed::chr_D_sg_C_(Scaffold_1;HRSCAF_2)::sgE	arabica_cultivated__vs__arabica_introgressed	chr_D_sg_E_(Scaffold_2;HRSCAF_3)	4e	gene-LOC140005729	LOC140005729	LOC140005729	lncRNA	uncharacterized LOC140005729
arabica_cultivated__vs__arabica_introgressed::chr_D_sg_C_(Scaffold_1;HRSCAF_2)::sgE	arabica_cultivated__vs__arabica_introgressed	chr_D_sg_E_(Scaffold_2;HRSCAF_3)	4e	gene-LOC140005730	LOC140005730	LOC140005730	lncRNA	uncharacterized LOC140005730
arabica_cultivated__vs__arabica_introgressed::chr_D_sg_C_(Scaffold_1;HRSCAF_2)::sgE	arabica_cultivated__vs__arabica_introgressed	chr_D_sg_E_(Scaffold_2;HRSCAF_3)	4e	gene-LOC140005516	LOC140005516	LOC140005516	protein_coding	zinc finger BED domain-containing protein RICESLEEPER 2-like
arabica_cultivated__vs__arabica_introgressed::chr_D_sg_C_(Scaffold_1;HRSCAF_2)::sgE	arabica_cultivated__vs__arabica_introgressed	chr_D_sg_E_(Scaffold_2;HRSCAF_3)	4e	gene-LOC113741169	LOC113741169	LOC113741169	protein_coding	large ribosomal subunit protein uL18c
arabica_cultivated__vs__arabica_introgressed::chr_D_sg_C_(Scaffold_1;HRSCAF_2)::sgE	arabica_cultivated__vs__arabica_introgressed	chr_D_sg_E_(Scaffold_2;HRSCAF_3)	4e	gene-LOC113742070	LOC113742070	LOC113742070	lncRNA	uncharacterized LOC113742070
arabica_cultivated__vs__arabica_introgressed::chr_D_sg_C_(Scaffold_1;HRSCAF_2)::sgE	arabica_cultivated__vs__arabica_introgressed	chr_D_sg_E_(Scaffold_2;HRSCAF_3)	4e	gene-LOC140006079	LOC140006079	LOC140006079	lncRNA	uncharacterized LOC140006079
arabica_cultivated__vs__arabica_introgressed::chr_D_sg_C_(Scaffold_1;HRSCAF_2)::sgE	arabica_cultivated__vs__arabica_introgressed	chr_D_sg_E_(Scaffold_2;HRSCAF_3)	4e	gene-LOC113742172	LOC113742172	LOC113742172	protein_coding	uncharacterized LOC113742172
arabica_cultivated__vs__arabica_introgressed::chr_D_sg_C_(Scaffold_1;HRSCAF_2)::sgE	arabica_cultivated__vs__arabica_introgressed	chr_D_sg_E_(Scaffold_2;HRSCAF_3)	4e	gene-LOC113740867	LOC113740867	LOC113740867	protein_coding	protein FAR1-RELATED SEQUENCE 5-like
arabica_cultivated__vs__arabica_introgressed::chr_D_sg_C_(Scaffold_1;HRSCAF_2)::sgE	arabica_cultivated__vs__arabica_introgressed	chr_D_sg_E_(Scaffold_2;HRSCAF_3)	4e	gene-LOC140005517	LOC140005517	LOC140005517	protein_coding	protein FAR1-RELATED SEQUENCE 5-like
arabica_cultivated__vs__arabica_introgressed::chr_D_sg_C_(Scaffold_1;HRSCAF_2)::sgE	arabica_cultivated__vs__arabica_introgressed	chr_D_sg_E_(Scaffold_2;HRSCAF_3)	4e	gene-LOC113742161	LOC113742161	LOC113742161	protein_coding	ABC transporter G family member 11-like	transport_membrane
arabica_cultivated__vs__arabica_introgressed::chr_D_sg_C_(Scaffold_1;HRSCAF_2)::sgE	arabica_cultivated__vs__arabica_introgressed	chr_D_sg_E_(Scaffold_2;HRSCAF_3)	4e	gene-LOC140005731	LOC140005731	LOC140005731	lncRNA	uncharacterized LOC140005731
arabica_cultivated__vs__arabica_introgressed::chr_D_sg_C_(Scaffold_1;HRSCAF_2)::sgE	arabica_cultivated__vs__arabica_introgressed	chr_D_sg_E_(Scaffold_2;HRSCAF_3)	4e	gene-LOC140005518	LOC140005518	LOC140005518	protein_coding	uncharacterized LOC140005518
arabica_cultivated__vs__arabica_introgressed::chr_D_sg_C_(Scaffold_1;HRSCAF_2)::sgE	arabica_cultivated__vs__arabica_introgressed	chr_D_sg_E_(Scaffold_2;HRSCAF_3)	4e	gene-LOC113705611	LOC113705611	LOC113705611	protein_coding	rhomboid-like protein 14%2C mitochondrial
arabica_cultivated__vs__arabica_introgressed::chr_D_sg_C_(Scaffold_1;HRSCAF_2)::sgE	arabica_cultivated__vs__arabica_introgressed	chr_D_sg_E_(Scaffold_2;HRSCAF_3)	4e	gene-LOC113705773	LOC113705773	LOC113705773	protein_coding	putative disease resistance protein RGA4	stress_response
arabica_cultivated__vs__arabica_introgressed::chr_D_sg_C_(Scaffold_1;HRSCAF_2)::sgE	arabica_cultivated__vs__arabica_introgressed	chr_D_sg_E_(Scaffold_2;HRSCAF_3)	4e	gene-LOC113705774	LOC113705774	LOC113705774	protein_coding	uncharacterized LOC113705774
arabica_cultivated__vs__arabica_introgressed::chr_D_sg_C_(Scaffold_1;HRSCAF_2)::sgE	arabica_cultivated__vs__arabica_introgressed	chr_D_sg_E_(Scaffold_2;HRSCAF_3)	4e	gene-LOC113742013	LOC113742013	LOC113742013	lncRNA	uncharacterized LOC113742013
arabica_cultivated__vs__arabica_introgressed::chr_D_sg_C_(Scaffold_1;HRSCAF_2)::sgE	arabica_cultivated__vs__arabica_introgressed	chr_D_sg_E_(Scaffold_2;HRSCAF_3)	4e	gene-LOC113740868	LOC113740868	LOC113740868	protein_coding	uncharacterized LOC113740868
arabica_cultivated__vs__arabica_introgressed::chr_D_sg_C_(Scaffold_1;HRSCAF_2)::sgE	arabica_cultivated__vs__arabica_introgressed	chr_D_sg_E_(Scaffold_2;HRSCAF_3)	4e	gene-LOC113740869	LOC113740869	LOC113740869	protein_coding	uncharacterized LOC113740869
arabica_cultivated__vs__arabica_introgressed::chr_D_sg_C_(Scaffold_1;HRSCAF_2)::sgE	arabica_cultivated__vs__arabica_introgressed	chr_D_sg_E_(Scaffold_2;HRSCAF_3)	4e	gene-LOC140005519	LOC140005519	LOC140005519	protein_coding	uncharacterized LOC140005519
arabica_cultivated__vs__arabica_introgressed::chr_D_sg_C_(Scaffold_1;HRSCAF_2)::sgE	arabica_cultivated__vs__arabica_introgressed	chr_D_sg_E_(Scaffold_2;HRSCAF_3)	4e	gene-LOC113743043	LOC113743043	LOC113743043	protein_coding	alpha-galactosidase-like
arabica_cultivated__vs__arabica_introgressed::chr_D_sg_C_(Scaffold_1;HRSCAF_2)::sgE	arabica_cultivated__vs__arabica_introgressed	chr_D_sg_E_(Scaffold_2;HRSCAF_3)	4e	gene-LOC113740870	LOC113740870	LOC113740870	protein_coding	uncharacterized LOC113740870
arabica_cultivated__vs__arabica_introgressed::chr_D_sg_C_(Scaffold_1;HRSCAF_2)::sgE	arabica_cultivated__vs__arabica_introgressed	chr_D_sg_E_(Scaffold_2;HRSCAF_3)	4e	gene-LOC113741710	LOC113741710	LOC113741710	lncRNA	uncharacterized LOC113741710
arabica_cultivated__vs__arabica_introgressed::chr_D_sg_C_(Scaffold_1;HRSCAF_2)::sgE	arabica_cultivated__vs__arabica_introgressed	chr_D_sg_E_(Scaffold_2;HRSCAF_3)	4e	gene-LOC113743019	LOC113743019	LOC113743019	protein_coding	uncharacterized LOC113743019
arabica_cultivated__vs__arabica_introgressed::chr_D_sg_C_(Scaffold_1;HRSCAF_2)::sgE	arabica_cultivated__vs__arabica_introgressed	chr_D_sg_E_(Scaffold_2;HRSCAF_3)	4e	gene-LOC113742112	LOC113742112	LOC113742112	protein_coding	uncharacterized LOC113742112
arabica_cultivated__vs__arabica_introgressed::chr_D_sg_C_(Scaffold_1;HRSCAF_2)::sgE	arabica_cultivated__vs__arabica_introgressed	chr_D_sg_E_(Scaffold_2;HRSCAF_3)	4e	gene-LOC113742014	LOC113742014	LOC113742014	protein_coding	probable aquaporin TIP3-2
arabica_cultivated__vs__arabica_introgressed::chr_D_sg_C_(Scaffold_1;HRSCAF_2)::sgE	arabica_cultivated__vs__arabica_introgressed	chr_D_sg_E_(Scaffold_2;HRSCAF_3)	4e	gene-LOC113740871	LOC113740871	LOC113740871	protein_coding	probable leucine-rich repeat receptor-like protein kinase At1g68400	defense_receptor, kinase_signaling
arabica_cultivated__vs__arabica_introgressed::chr_D_sg_C_(Scaffold_1;HRSCAF_2)::sgE	arabica_cultivated__vs__arabica_introgressed	chr_D_sg_E_(Scaffold_2;HRSCAF_3)	4e	gene-LOC113740873	LOC113740873	LOC113740873	protein_coding	uncharacterized LOC113740873
arabica_cultivated__vs__arabica_introgressed::chr_D_sg_C_(Scaffold_1;HRSCAF_2)::sgE	arabica_cultivated__vs__arabica_introgressed	chr_D_sg_E_(Scaffold_2;HRSCAF_3)	4e	gene-LOC113741339	LOC113741339	LOC113741339	protein_coding	uncharacterized LOC113741339
arabica_cultivated__vs__arabica_introgressed::chr_D_sg_C_(Scaffold_1;HRSCAF_2)::sgE	arabica_cultivated__vs__arabica_introgressed	chr_D_sg_E_(Scaffold_2;HRSCAF_3)	4e	gene-LOC113741728	LOC113741728	LOC113741728	protein_coding	uncharacterized LOC113741728
arabica_cultivated__vs__arabica_introgressed::chr_D_sg_C_(Scaffold_1;HRSCAF_2)::sgE	arabica_cultivated__vs__arabica_introgressed	chr_D_sg_E_(Scaffold_2;HRSCAF_3)	4e	gene-LOC113742741	LOC113742741	LOC113742741	protein_coding	uncharacterized LOC113742741
arabica_cultivated__vs__arabica_introgressed::chr_D_sg_C_(Scaffold_1;HRSCAF_2)::sgE	arabica_cultivated__vs__arabica_introgressed	chr_D_sg_E_(Scaffold_2;HRSCAF_3)	4e	gene-LOC113742826	LOC113742826	LOC113742826	protein_coding	beta-galactosidase 10
arabica_cultivated__vs__arabica_introgressed::chr_D_sg_C_(Scaffold_1;HRSCAF_2)::sgE	arabica_cultivated__vs__arabica_introgressed	chr_D_sg_E_(Scaffold_2;HRSCAF_3)	4e	gene-LOC140006080	LOC140006080	LOC140006080	lncRNA	uncharacterized LOC140006080
arabica_cultivated__vs__arabica_introgressed::chr_D_sg_C_(Scaffold_1;HRSCAF_2)::sgE	arabica_cultivated__vs__arabica_introgressed	chr_D_sg_E_(Scaffold_2;HRSCAF_3)	4e	gene-LOC113741827	LOC113741827	LOC113741827	protein_coding	abietadienol/abietadienal oxidase
arabica_cultivated__vs__arabica_introgressed::chr_D_sg_C_(Scaffold_1;HRSCAF_2)::sgE	arabica_cultivated__vs__arabica_introgressed	chr_D_sg_E_(Scaffold_2;HRSCAF_3)	4e	gene-LOC113742566	LOC113742566	LOC113742566	protein_coding	mitogen-activated protein kinase kinase 3	kinase_signaling
arabica_cultivated__vs__arabica_introgressed::chr_D_sg_C_(Scaffold_1;HRSCAF_2)::sgE	arabica_cultivated__vs__arabica_introgressed	chr_D_sg_E_(Scaffold_2;HRSCAF_3)	4e	gene-LOC113740877	LOC113740877	LOC113740877	protein_coding	uncharacterized LOC113740877
arabica_cultivated__vs__arabica_introgressed::chr_D_sg_C_(Scaffold_1;HRSCAF_2)::sgE	arabica_cultivated__vs__arabica_introgressed	chr_D_sg_E_(Scaffold_2;HRSCAF_3)	4e	gene-LOC140005520	LOC140005520	LOC140005520	protein_coding	uncharacterized LOC140005520
arabica_cultivated__vs__arabica_introgressed::chr_D_sg_C_(Scaffold_1;HRSCAF_2)::sgE	arabica_cultivated__vs__arabica_introgressed	chr_D_sg_E_(Scaffold_2;HRSCAF_3)	4e	gene-LOC140005521	LOC140005521	LOC140005521	protein_coding	uncharacterized LOC140005521
arabica_cultivated__vs__arabica_introgressed::chr_D_sg_C_(Scaffold_1;HRSCAF_2)::sgE	arabica_cultivated__vs__arabica_introgressed	chr_D_sg_E_(Scaffold_2;HRSCAF_3)	4e	gene-LOC113740878	LOC113740878	LOC113740878	protein_coding	uncharacterized LOC113740878
arabica_cultivated__vs__arabica_introgressed::chr_D_sg_C_(Scaffold_1;HRSCAF_2)::sgE	arabica_cultivated__vs__arabica_introgressed	chr_D_sg_E_(Scaffold_2;HRSCAF_3)	4e	gene-LOC113742816	LOC113742816	LOC113742816	protein_coding	uncharacterized LOC113742816
arabica_cultivated__vs__arabica_introgressed::chr_D_sg_C_(Scaffold_1;HRSCAF_2)::sgE	arabica_cultivated__vs__arabica_introgressed	chr_D_sg_E_(Scaffold_2;HRSCAF_3)	4e	gene-LOC113742707	LOC113742707	LOC113742707	protein_coding	uncharacterized LOC113742707
arabica_cultivated__vs__arabica_introgressed::chr_D_sg_C_(Scaffold_1;HRSCAF_2)::sgE	arabica_cultivated__vs__arabica_introgressed	chr_D_sg_E_(Scaffold_2;HRSCAF_3)	4e	gene-LOC113740879	LOC113740879	LOC113740879	protein_coding	uncharacterized LOC113740879
arabica_cultivated__vs__arabica_introgressed::chr_D_sg_C_(Scaffold_1;HRSCAF_2)::sgE	arabica_cultivated__vs__arabica_introgressed	chr_D_sg_E_(Scaffold_2;HRSCAF_3)	4e	gene-LOC140005732	LOC140005732	LOC140005732	lncRNA	uncharacterized LOC140005732
arabica_cultivated__vs__arabica_introgressed::chr_D_sg_C_(Scaffold_1;HRSCAF_2)::sgE	arabica_cultivated__vs__arabica_introgressed	chr_D_sg_E_(Scaffold_2;HRSCAF_3)	4e	gene-LOC140005733	LOC140005733	LOC140005733	lncRNA	uncharacterized LOC140005733
arabica_cultivated__vs__arabica_introgressed::chr_D_sg_C_(Scaffold_1;HRSCAF_2)::sgE	arabica_cultivated__vs__arabica_introgressed	chr_D_sg_E_(Scaffold_2;HRSCAF_3)	4e	gene-LOC113741788	LOC113741788	LOC113741788	protein_coding	exocyst complex component EXO70E2-like
arabica_cultivated__vs__arabica_introgressed::chr_D_sg_C_(Scaffold_1;HRSCAF_2)::sgE	arabica_cultivated__vs__arabica_introgressed	chr_D_sg_E_(Scaffold_2;HRSCAF_3)	4e	gene-LOC113741411	LOC113741411	LOC113741411	protein_coding	presenilin-like protein At2g29900
arabica_cultivated__vs__arabica_introgressed::chr_D_sg_C_(Scaffold_1;HRSCAF_2)::sgE	arabica_cultivated__vs__arabica_introgressed	chr_D_sg_E_(Scaffold_2;HRSCAF_3)	4e	gene-LOC140005522	LOC140005522	LOC140005522	protein_coding	uncharacterized LOC140005522
arabica_cultivated__vs__arabica_introgressed::chr_D_sg_C_(Scaffold_1;HRSCAF_2)::sgE	arabica_cultivated__vs__arabica_introgressed	chr_D_sg_E_(Scaffold_2;HRSCAF_3)	4e	gene-LOC140005523	LOC140005523	LOC140005523	protein_coding	uncharacterized LOC140005523
arabica_cultivated__vs__arabica_introgressed::chr_D_sg_C_(Scaffold_1;HRSCAF_2)::sgE	arabica_cultivated__vs__arabica_introgressed	chr_D_sg_E_(Scaffold_2;HRSCAF_3)	4e	gene-LOC140005524	LOC140005524	LOC140005524	protein_coding	uncharacterized LOC140005524
arabica_cultivated__vs__arabica_introgressed::chr_D_sg_C_(Scaffold_1;HRSCAF_2)::sgE	arabica_cultivated__vs__arabica_introgressed	chr_D_sg_E_(Scaffold_2;HRSCAF_3)	4e	gene-LOC140005525	LOC140005525	LOC140005525	protein_coding	uncharacterized LOC140005525
arabica_cultivated__vs__arabica_introgressed::chr_D_sg_C_(Scaffold_1;HRSCAF_2)::sgE	arabica_cultivated__vs__arabica_introgressed	chr_D_sg_E_(Scaffold_2;HRSCAF_3)	4e	gene-LOC140005734	LOC140005734	LOC140005734	lncRNA	uncharacterized LOC140005734
arabica_cultivated__vs__arabica_introgressed::chr_D_sg_C_(Scaffold_1;HRSCAF_2)::sgE	arabica_cultivated__vs__arabica_introgressed	chr_D_sg_E_(Scaffold_2;HRSCAF_3)	4e	gene-LOC140005735	LOC140005735	LOC140005735	lncRNA	uncharacterized LOC140005735
arabica_cultivated__vs__arabica_introgressed::chr_D_sg_C_(Scaffold_1;HRSCAF_2)::sgE	arabica_cultivated__vs__arabica_introgressed	chr_D_sg_E_(Scaffold_2;HRSCAF_3)	4e	gene-LOC113742015	LOC113742015	LOC113742015	lncRNA	uncharacterized LOC113742015
arabica_cultivated__vs__arabica_introgressed::chr_D_sg_C_(Scaffold_1;HRSCAF_2)::sgE	arabica_cultivated__vs__arabica_introgressed	chr_D_sg_E_(Scaffold_2;HRSCAF_3)	4e	gene-LOC113741508	LOC113741508	LOC113741508	protein_coding	COBRA-like protein 4
arabica_cultivated__vs__arabica_introgressed::chr_D_sg_C_(Scaffold_1;HRSCAF_2)::sgE	arabica_cultivated__vs__arabica_introgressed	chr_D_sg_E_(Scaffold_2;HRSCAF_3)	4e	gene-LOC113741509	LOC113741509	LOC113741509	protein_coding	COBRA-like protein 2
arabica_cultivated__vs__arabica_introgressed::chr_D_sg_C_(Scaffold_1;HRSCAF_2)::sgE	arabica_cultivated__vs__arabica_introgressed	chr_D_sg_E_(Scaffold_2;HRSCAF_3)	4e	gene-LOC140006081	LOC140006081	LOC140006081	lncRNA	uncharacterized LOC140006081
arabica_cultivated__vs__arabica_introgressed::chr_D_sg_C_(Scaffold_1;HRSCAF_2)::sgE	arabica_cultivated__vs__arabica_introgressed	chr_D_sg_E_(Scaffold_2;HRSCAF_3)	4e	gene-LOC140006082	LOC140006082	LOC140006082	lncRNA	uncharacterized LOC140006082
arabica_cultivated__vs__arabica_introgressed::chr_D_sg_C_(Scaffold_1;HRSCAF_2)::sgE	arabica_cultivated__vs__arabica_introgressed	chr_D_sg_E_(Scaffold_2;HRSCAF_3)	4e	gene-LOC140006083	LOC140006083	LOC140006083	lncRNA	uncharacterized LOC140006083
arabica_cultivated__vs__arabica_introgressed::chr_D_sg_C_(Scaffold_1;HRSCAF_2)::sgE	arabica_cultivated__vs__arabica_introgressed	chr_D_sg_E_(Scaffold_2;HRSCAF_3)	4e	gene-LOC140006084	LOC140006084	LOC140006084	lncRNA	uncharacterized LOC140006084
arabica_cultivated__vs__arabica_introgressed::chr_D_sg_C_(Scaffold_1;HRSCAF_2)::sgE	arabica_cultivated__vs__arabica_introgressed	chr_D_sg_E_(Scaffold_2;HRSCAF_3)	4e	gene-LOC113741849	LOC113741849	LOC113741849	protein_coding	COBRA-like protein 2
arabica_cultivated__vs__arabica_introgressed::chr_D_sg_C_(Scaffold_1;HRSCAF_2)::sgE	arabica_cultivated__vs__arabica_introgressed	chr_D_sg_E_(Scaffold_2;HRSCAF_3)	4e	gene-LOC113741851	LOC113741851	LOC113741851	lncRNA	uncharacterized LOC113741851
arabica_cultivated__vs__arabica_introgressed::chr_D_sg_C_(Scaffold_1;HRSCAF_2)::sgE	arabica_cultivated__vs__arabica_introgressed	chr_D_sg_E_(Scaffold_2;HRSCAF_3)	4e	gene-LOC113741189	LOC113741189	LOC113741189	lncRNA	uncharacterized LOC113741189
arabica_cultivated__vs__arabica_introgressed::chr_D_sg_C_(Scaffold_1;HRSCAF_2)::sgE	arabica_cultivated__vs__arabica_introgressed	chr_D_sg_E_(Scaffold_2;HRSCAF_3)	4e	gene-LOC113740891	LOC113740891	LOC113740891	protein_coding	uncharacterized LOC113740891
arabica_cultivated__vs__arabica_introgressed::chr_D_sg_C_(Scaffold_1;HRSCAF_2)::sgE	arabica_cultivated__vs__arabica_introgressed	chr_D_sg_E_(Scaffold_2;HRSCAF_3)	4e	gene-LOC140005526	LOC140005526	LOC140005526	protein_coding	secreted RxLR effector protein 161-like
arabica_cultivated__vs__arabica_introgressed::chr_D_sg_C_(Scaffold_1;HRSCAF_2)::sgE	arabica_cultivated__vs__arabica_introgressed	chr_D_sg_E_(Scaffold_2;HRSCAF_3)	4e	gene-LOC140006085	LOC140006085	LOC140006085	protein_coding	cleavage stimulation factor subunit 50-like
arabica_cultivated__vs__arabica_introgressed::chr_D_sg_C_(Scaffold_1;HRSCAF_2)::sgE	arabica_cultivated__vs__arabica_introgressed	chr_D_sg_E_(Scaffold_2;HRSCAF_3)	4e	gene-LOC140006086	LOC140006086	LOC140006086	protein_coding	small ribosomal subunit protein mL104 (rPPR9)-like
arabica_cultivated__vs__arabica_introgressed::chr_D_sg_C_(Scaffold_1;HRSCAF_2)::sgE	arabica_cultivated__vs__arabica_introgressed	chr_D_sg_E_(Scaffold_2;HRSCAF_3)	4e	gene-LOC140006087	LOC140006087	LOC140006087	protein_coding	psbP-like protein 1%2C chloroplastic
arabica_cultivated__vs__arabica_introgressed::chr_D_sg_C_(Scaffold_1;HRSCAF_2)::sgE	arabica_cultivated__vs__arabica_introgressed	chr_D_sg_E_(Scaffold_2;HRSCAF_3)	4e	gene-LOC140006088	LOC140006088	LOC140006088	protein_coding	cytochrome P450 78A5-like
arabica_cultivated__vs__arabica_introgressed::chr_D_sg_C_(Scaffold_1;HRSCAF_2)::sgE	arabica_cultivated__vs__arabica_introgressed	chr_D_sg_E_(Scaffold_2;HRSCAF_3)	4e	gene-LOC113729160	LOC113729160	LOC113729160	protein_coding	zinc finger BED domain-containing protein RICESLEEPER 2-like
arabica_cultivated__vs__arabica_introgressed::chr_D_sg_C_(Scaffold_1;HRSCAF_2)::sgE	arabica_cultivated__vs__arabica_introgressed	chr_D_sg_E_(Scaffold_2;HRSCAF_3)	4e	gene-LOC140005736	LOC140005736	LOC140005736	lncRNA	uncharacterized LOC140005736
arabica_cultivated__vs__arabica_introgressed::chr_D_sg_C_(Scaffold_1;HRSCAF_2)::sgE	arabica_cultivated__vs__arabica_introgressed	chr_D_sg_E_(Scaffold_2;HRSCAF_3)	4e	gene-LOC140005737	LOC140005737	LOC140005737	lncRNA	uncharacterized LOC140005737
arabica_cultivated__vs__arabica_introgressed::chr_D_sg_C_(Scaffold_1;HRSCAF_2)::sgE	arabica_cultivated__vs__arabica_introgressed	chr_D_sg_E_(Scaffold_2;HRSCAF_3)	4e	gene-LOC140005738	LOC140005738	LOC140005738	lncRNA	uncharacterized LOC140005738
arabica_cultivated__vs__arabica_introgressed::chr_D_sg_C_(Scaffold_1;HRSCAF_2)::sgE	arabica_cultivated__vs__arabica_introgressed	chr_D_sg_E_(Scaffold_2;HRSCAF_3)	4e	gene-LOC140006089	LOC140006089	LOC140006089	lncRNA	uncharacterized LOC140006089
arabica_cultivated__vs__arabica_introgressed::chr_D_sg_C_(Scaffold_1;HRSCAF_2)::sgE	arabica_cultivated__vs__arabica_introgressed	chr_D_sg_E_(Scaffold_2;HRSCAF_3)	4e	gene-LOC113742255	LOC113742255	LOC113742255	lncRNA	uncharacterized LOC113742255
arabica_cultivated__vs__arabica_introgressed::chr_D_sg_C_(Scaffold_1;HRSCAF_2)::sgE	arabica_cultivated__vs__arabica_introgressed	chr_D_sg_E_(Scaffold_2;HRSCAF_3)	4e	gene-LOC113740883	LOC113740883	LOC113740883	protein_coding	protein FAR1-RELATED SEQUENCE 5-like
arabica_cultivated__vs__arabica_introgressed::chr_D_sg_C_(Scaffold_1;HRSCAF_2)::sgE	arabica_cultivated__vs__arabica_introgressed	chr_D_sg_E_(Scaffold_2;HRSCAF_3)	4e	gene-LOC113741757	LOC113741757	LOC113741757	protein_coding	ABC transporter B family member 25	transport_membrane
arabica_cultivated__vs__arabica_introgressed::chr_D_sg_C_(Scaffold_1;HRSCAF_2)::sgE	arabica_cultivated__vs__arabica_introgressed	chr_D_sg_E_(Scaffold_2;HRSCAF_3)	4e	gene-LOC113741759	LOC113741759	LOC113741759	protein_coding	transcription termination factor MTERF15%2C mitochondrial
arabica_cultivated__vs__arabica_introgressed::chr_D_sg_C_(Scaffold_1;HRSCAF_2)::sgE	arabica_cultivated__vs__arabica_introgressed	chr_D_sg_E_(Scaffold_2;HRSCAF_3)	4e	gene-LOC113743109	LOC113743109	LOC113743109	snoRNA	small nucleolar RNA R71
arabica_cultivated__vs__arabica_introgressed::chr_D_sg_C_(Scaffold_1;HRSCAF_2)::sgE	arabica_cultivated__vs__arabica_introgressed	chr_D_sg_E_(Scaffold_2;HRSCAF_3)	4e	gene-LOC140005527	LOC140005527	LOC140005527	protein_coding	uncharacterized LOC140005527
arabica_cultivated__vs__arabica_introgressed::chr_D_sg_C_(Scaffold_1;HRSCAF_2)::sgE	arabica_cultivated__vs__arabica_introgressed	chr_D_sg_E_(Scaffold_2;HRSCAF_3)	4e	gene-LOC140005529	LOC140005529	LOC140005529	protein_coding	uncharacterized LOC140005529
arabica_cultivated__vs__arabica_introgressed::chr_D_sg_C_(Scaffold_1;HRSCAF_2)::sgE	arabica_cultivated__vs__arabica_introgressed	chr_D_sg_E_(Scaffold_2;HRSCAF_3)	4e	gene-LOC140005530	LOC140005530	LOC140005530	protein_coding	uncharacterized LOC140005530
arabica_cultivated__vs__arabica_introgressed::chr_D_sg_C_(Scaffold_1;HRSCAF_2)::sgE	arabica_cultivated__vs__arabica_introgressed	chr_D_sg_E_(Scaffold_2;HRSCAF_3)	4e	gene-LOC113741274	LOC113741274	LOC113741274	protein_coding	RHOMBOID-like protein 12%2C mitochondrial
arabica_cultivated__vs__arabica_introgressed::chr_D_sg_C_(Scaffold_1;HRSCAF_2)::sgE	arabica_cultivated__vs__arabica_introgressed	chr_D_sg_E_(Scaffold_2;HRSCAF_3)	4e	gene-LOC140006090	LOC140006090	LOC140006090	protein_coding	RHOMBOID-like protein 12%2C mitochondrial
arabica_cultivated__vs__arabica_introgressed::chr_D_sg_C_(Scaffold_1;HRSCAF_2)::sgE	arabica_cultivated__vs__arabica_introgressed	chr_D_sg_E_(Scaffold_2;HRSCAF_3)	4e	gene-LOC140006091	LOC140006091	LOC140006091	protein_coding	RHOMBOID-like protein 12%2C mitochondrial
arabica_cultivated__vs__arabica_introgressed::chr_D_sg_C_(Scaffold_1;HRSCAF_2)::sgE	arabica_cultivated__vs__arabica_introgressed	chr_D_sg_E_(Scaffold_2;HRSCAF_3)	4e	gene-LOC140005531	LOC140005531	LOC140005531	protein_coding	uncharacterized LOC140005531
arabica_cultivated__vs__arabica_introgressed::chr_D_sg_C_(Scaffold_1;HRSCAF_2)::sgE	arabica_cultivated__vs__arabica_introgressed	chr_D_sg_E_(Scaffold_2;HRSCAF_3)	4e	gene-LOC140006092	LOC140006092	LOC140006092	protein_coding	uncharacterized LOC140006092
arabica_cultivated__vs__arabica_introgressed::chr_D_sg_C_(Scaffold_1;HRSCAF_2)::sgE	arabica_cultivated__vs__arabica_introgressed	chr_D_sg_E_(Scaffold_2;HRSCAF_3)	4e	gene-LOC140005532	LOC140005532	LOC140005532	protein_coding	uncharacterized LOC140005532
arabica_cultivated__vs__arabica_introgressed::chr_D_sg_C_(Scaffold_1;HRSCAF_2)::sgE	arabica_cultivated__vs__arabica_introgressed	chr_D_sg_E_(Scaffold_2;HRSCAF_3)	4e	gene-LOC113719541	LOC113719541	LOC113719541	protein_coding	protein GLUTELIN PRECURSOR ACCUMULATION 3
arabica_cultivated__vs__arabica_introgressed::chr_D_sg_C_(Scaffold_1;HRSCAF_2)::sgE	arabica_cultivated__vs__arabica_introgressed	chr_D_sg_E_(Scaffold_2;HRSCAF_3)	4e	gene-LOC113719225	LOC113719225	LOC113719225	protein_coding	protein SPIRAL1-like 2
arabica_cultivated__vs__arabica_introgressed::chr_D_sg_C_(Scaffold_1;HRSCAF_2)::sgE	arabica_cultivated__vs__arabica_introgressed	chr_D_sg_E_(Scaffold_2;HRSCAF_3)	4e	gene-LOC140006093	LOC140006093	LOC140006093	lncRNA	uncharacterized LOC140006093
arabica_cultivated__vs__arabica_introgressed::chr_D_sg_C_(Scaffold_1;HRSCAF_2)::sgE	arabica_cultivated__vs__arabica_introgressed	chr_D_sg_E_(Scaffold_2;HRSCAF_3)	4e	gene-LOC113722476	LOC113722476	LOC113722476	lncRNA	uncharacterized LOC113722476
arabica_cultivated__vs__arabica_introgressed::chr_D_sg_C_(Scaffold_1;HRSCAF_2)::sgE	arabica_cultivated__vs__arabica_introgressed	chr_D_sg_E_(Scaffold_2;HRSCAF_3)	4e	gene-LOC140005533	LOC140005533	LOC140005533	protein_coding	uncharacterized LOC140005533
arabica_cultivated__vs__arabica_introgressed::chr_D_sg_C_(Scaffold_1;HRSCAF_2)::sgE	arabica_cultivated__vs__arabica_introgressed	chr_D_sg_E_(Scaffold_2;HRSCAF_3)	4e	gene-LOC140005739	LOC140005739	LOC140005739	lncRNA	uncharacterized LOC140005739
arabica_cultivated__vs__arabica_introgressed::chr_D_sg_C_(Scaffold_1;HRSCAF_2)::sgE	arabica_cultivated__vs__arabica_introgressed	chr_D_sg_E_(Scaffold_2;HRSCAF_3)	4e	gene-LOC140004521	LOC140004521	LOC140004521	protein_coding	uncharacterized LOC140004521
arabica_cultivated__vs__arabica_introgressed::chr_D_sg_C_(Scaffold_1;HRSCAF_2)::sgE	arabica_cultivated__vs__arabica_introgressed	chr_D_sg_E_(Scaffold_2;HRSCAF_3)	4e	gene-LOC140005534	LOC140005534	LOC140005534	protein_coding	uncharacterized LOC140005534
arabica_cultivated__vs__arabica_introgressed::chr_D_sg_C_(Scaffold_1;HRSCAF_2)::sgE	arabica_cultivated__vs__arabica_introgressed	chr_D_sg_E_(Scaffold_2;HRSCAF_3)	4e	gene-LOC113742990	LOC113742990	LOC113742990	protein_coding	uncharacterized LOC113742990
arabica_cultivated__vs__arabica_introgressed::chr_D_sg_C_(Scaffold_1;HRSCAF_2)::sgE	arabica_cultivated__vs__arabica_introgressed	chr_D_sg_E_(Scaffold_2;HRSCAF_3)	4e	gene-LOC113741482	LOC113741482	LOC113741482	protein_coding	protein LONGIFOLIA 1
arabica_cultivated__vs__arabica_introgressed::chr_D_sg_C_(Scaffold_1;HRSCAF_2)::sgE	arabica_cultivated__vs__arabica_introgressed	chr_D_sg_E_(Scaffold_2;HRSCAF_3)	4e	gene-LOC113741595	LOC113741595	LOC113741595	lncRNA	uncharacterized LOC113741595
arabica_cultivated__vs__arabica_introgressed::chr_D_sg_C_(Scaffold_1;HRSCAF_2)::sgE	arabica_cultivated__vs__arabica_introgressed	chr_D_sg_E_(Scaffold_2;HRSCAF_3)	4e	gene-LOC140005740	LOC140005740	LOC140005740	lncRNA	uncharacterized LOC140005740
arabica_cultivated__vs__arabica_introgressed::chr_D_sg_C_(Scaffold_1;HRSCAF_2)::sgE	arabica_cultivated__vs__arabica_introgressed	chr_D_sg_E_(Scaffold_2;HRSCAF_3)	4e	gene-LOC140005741	LOC140005741	LOC140005741	lncRNA	uncharacterized LOC140005741
arabica_cultivated__vs__arabica_introgressed::chr_D_sg_C_(Scaffold_1;HRSCAF_2)::sgE	arabica_cultivated__vs__arabica_introgressed	chr_D_sg_E_(Scaffold_2;HRSCAF_3)	4e	gene-LOC140005742	LOC140005742	LOC140005742	lncRNA	uncharacterized LOC140005742
arabica_cultivated__vs__arabica_introgressed::chr_D_sg_C_(Scaffold_1;HRSCAF_2)::sgE	arabica_cultivated__vs__arabica_introgressed	chr_D_sg_E_(Scaffold_2;HRSCAF_3)	4e	gene-LOC140005743	LOC140005743	LOC140005743	lncRNA	uncharacterized LOC140005743
arabica_cultivated__vs__arabica_introgressed::chr_D_sg_C_(Scaffold_1;HRSCAF_2)::sgE	arabica_cultivated__vs__arabica_introgressed	chr_D_sg_E_(Scaffold_2;HRSCAF_3)	4e	gene-LOC140005745	LOC140005745	LOC140005745	lncRNA	uncharacterized LOC140005745
arabica_cultivated__vs__arabica_introgressed::chr_D_sg_C_(Scaffold_1;HRSCAF_2)::sgE	arabica_cultivated__vs__arabica_introgressed	chr_D_sg_E_(Scaffold_2;HRSCAF_3)	4e	gene-LOC113705150	LOC113705150	LOC113705150	snoRNA	small nucleolar RNA R71
arabica_cultivated__vs__arabica_introgressed::chr_D_sg_C_(Scaffold_1;HRSCAF_2)::sgE	arabica_cultivated__vs__arabica_introgressed	chr_D_sg_E_(Scaffold_2;HRSCAF_3)	4e	gene-LOC140005535	LOC140005535	LOC140005535	protein_coding	uncharacterized LOC140005535
arabica_cultivated__vs__arabica_introgressed::chr_D_sg_C_(Scaffold_1;HRSCAF_2)::sgE	arabica_cultivated__vs__arabica_introgressed	chr_D_sg_E_(Scaffold_2;HRSCAF_3)	4e	gene-LOC113703196	LOC113703196	LOC113703196	protein_coding	transcription factor TCP5-like	transcriptional_regulation
arabica_cultivated__vs__arabica_introgressed::chr_D_sg_C_(Scaffold_1;HRSCAF_2)::sgE	arabica_cultivated__vs__arabica_introgressed	chr_D_sg_E_(Scaffold_2;HRSCAF_3)	4e	gene-LOC113702566	LOC113702566	LOC113702566	snoRNA	small nucleolar RNA R71
arabica_cultivated__vs__arabica_introgressed::chr_D_sg_C_(Scaffold_1;HRSCAF_2)::sgE	arabica_cultivated__vs__arabica_introgressed	chr_D_sg_E_(Scaffold_2;HRSCAF_3)	4e	gene-LOC113740896	LOC113740896	LOC113740896	protein_coding	uncharacterized LOC113740896
arabica_cultivated__vs__arabica_introgressed::chr_D_sg_C_(Scaffold_1;HRSCAF_2)::sgE	arabica_cultivated__vs__arabica_introgressed	chr_D_sg_E_(Scaffold_2;HRSCAF_3)	4e	gene-LOC113741679	LOC113741679	LOC113741679	lncRNA	uncharacterized LOC113741679
arabica_cultivated__vs__arabica_introgressed::chr_D_sg_C_(Scaffold_1;HRSCAF_2)::sgE	arabica_cultivated__vs__arabica_introgressed	chr_D_sg_E_(Scaffold_2;HRSCAF_3)	4e	gene-LOC140005746	LOC140005746	LOC140005746	lncRNA	uncharacterized LOC140005746
arabica_cultivated__vs__arabica_introgressed::chr_D_sg_C_(Scaffold_1;HRSCAF_2)::sgE	arabica_cultivated__vs__arabica_introgressed	chr_D_sg_E_(Scaffold_2;HRSCAF_3)	4e	gene-LOC140005747	LOC140005747	LOC140005747	lncRNA	uncharacterized LOC140005747
arabica_cultivated__vs__arabica_introgressed::chr_D_sg_C_(Scaffold_1;HRSCAF_2)::sgE	arabica_cultivated__vs__arabica_introgressed	chr_D_sg_E_(Scaffold_2;HRSCAF_3)	4e	gene-LOC113740595	LOC113740595	LOC113740595	protein_coding	glycerophosphodiester phosphodiesterase GDPD6-like
arabica_cultivated__vs__arabica_introgressed::chr_D_sg_C_(Scaffold_1;HRSCAF_2)::sgE	arabica_cultivated__vs__arabica_introgressed	chr_D_sg_E_(Scaffold_2;HRSCAF_3)	4e	gene-LOC140005748	LOC140005748	LOC140005748	lncRNA	uncharacterized LOC140005748
arabica_cultivated__vs__arabica_introgressed::chr_D_sg_C_(Scaffold_1;HRSCAF_2)::sgE	arabica_cultivated__vs__arabica_introgressed	chr_D_sg_E_(Scaffold_2;HRSCAF_3)	4e	gene-LOC113740898	LOC113740898	LOC113740898	protein_coding	uncharacterized LOC113740898
arabica_cultivated__vs__arabica_introgressed::chr_D_sg_C_(Scaffold_1;HRSCAF_2)::sgE	arabica_cultivated__vs__arabica_introgressed	chr_D_sg_E_(Scaffold_2;HRSCAF_3)	4e	gene-LOC140005537	LOC140005537	LOC140005537	protein_coding	uncharacterized LOC140005537
arabica_cultivated__vs__arabica_introgressed::chr_D_sg_C_(Scaffold_1;HRSCAF_2)::sgE	arabica_cultivated__vs__arabica_introgressed	chr_D_sg_E_(Scaffold_2;HRSCAF_3)	4e	gene-LOC140005749	LOC140005749	LOC140005749	lncRNA	uncharacterized LOC140005749
arabica_cultivated__vs__arabica_introgressed::chr_D_sg_C_(Scaffold_1;HRSCAF_2)::sgE	arabica_cultivated__vs__arabica_introgressed	chr_D_sg_E_(Scaffold_2;HRSCAF_3)	4e	gene-LOC113742106	LOC113742106	LOC113742106	protein_coding	nuclear transport factor 2
arabica_cultivated__vs__arabica_introgressed::chr_D_sg_C_(Scaffold_1;HRSCAF_2)::sgE	arabica_cultivated__vs__arabica_introgressed	chr_D_sg_E_(Scaffold_2;HRSCAF_3)	4e	gene-LOC113742108	LOC113742108	LOC113742108	protein_coding	uncharacterized LOC113742108
arabica_cultivated__vs__arabica_introgressed::chr_D_sg_C_(Scaffold_1;HRSCAF_2)::sgE	arabica_cultivated__vs__arabica_introgressed	chr_D_sg_E_(Scaffold_2;HRSCAF_3)	4e	gene-LOC113741565	LOC113741565	LOC113741565	protein_coding	mitochondrial import receptor subunit TOM5 homolog	defense_receptor
arabica_cultivated__vs__arabica_introgressed::chr_D_sg_C_(Scaffold_1;HRSCAF_2)::sgE	arabica_cultivated__vs__arabica_introgressed	chr_D_sg_E_(Scaffold_2;HRSCAF_3)	4e	gene-LOC140005750	LOC140005750	LOC140005750	lncRNA	uncharacterized LOC140005750
arabica_cultivated__vs__arabica_introgressed::chr_D_sg_C_(Scaffold_1;HRSCAF_2)::sgE	arabica_cultivated__vs__arabica_introgressed	chr_D_sg_E_(Scaffold_2;HRSCAF_3)	4e	gene-LOC140005751	LOC140005751	LOC140005751	lncRNA	uncharacterized LOC140005751
arabica_cultivated__vs__arabica_introgressed::chr_D_sg_C_(Scaffold_1;HRSCAF_2)::sgE	arabica_cultivated__vs__arabica_introgressed	chr_D_sg_E_(Scaffold_2;HRSCAF_3)	4e	gene-LOC140005538	LOC140005538	LOC140005538	protein_coding	uncharacterized LOC140005538
arabica_cultivated__vs__arabica_introgressed::chr_D_sg_C_(Scaffold_1;HRSCAF_2)::sgE	arabica_cultivated__vs__arabica_introgressed	chr_D_sg_E_(Scaffold_2;HRSCAF_3)	4e	gene-LOC140004516	LOC140004516	LOC140004516	protein_coding	alcohol dehydrogenase-like 6
arabica_cultivated__vs__arabica_introgressed::chr_D_sg_C_(Scaffold_1;HRSCAF_2)::sgE	arabica_cultivated__vs__arabica_introgressed	chr_D_sg_E_(Scaffold_2;HRSCAF_3)	4e	gene-LOC140006094	LOC140006094	LOC140006094	lncRNA	uncharacterized LOC140006094
arabica_cultivated__vs__arabica_introgressed::chr_D_sg_C_(Scaffold_1;HRSCAF_2)::sgE	arabica_cultivated__vs__arabica_introgressed	chr_D_sg_E_(Scaffold_2;HRSCAF_3)	4e	gene-LOC140005539	LOC140005539	LOC140005539	protein_coding	protein FAR1-RELATED SEQUENCE 5-like
arabica_cultivated__vs__arabica_introgressed::chr_D_sg_C_(Scaffold_1;HRSCAF_2)::sgE	arabica_cultivated__vs__arabica_introgressed	chr_D_sg_E_(Scaffold_2;HRSCAF_3)	4e	gene-LOC140005752	LOC140005752	LOC140005752	lncRNA	uncharacterized LOC140005752
arabica_cultivated__vs__arabica_introgressed::chr_D_sg_C_(Scaffold_1;HRSCAF_2)::sgE	arabica_cultivated__vs__arabica_introgressed	chr_D_sg_E_(Scaffold_2;HRSCAF_3)	4e	gene-LOC140005753	LOC140005753	LOC140005753	lncRNA	uncharacterized LOC140005753
arabica_cultivated__vs__arabica_introgressed::chr_D_sg_C_(Scaffold_1;HRSCAF_2)::sgE	arabica_cultivated__vs__arabica_introgressed	chr_D_sg_E_(Scaffold_2;HRSCAF_3)	4e	gene-LOC140005540	LOC140005540	LOC140005540	protein_coding	uncharacterized LOC140005540
arabica_cultivated__vs__arabica_introgressed::chr_D_sg_C_(Scaffold_1;HRSCAF_2)::sgE	arabica_cultivated__vs__arabica_introgressed	chr_D_sg_E_(Scaffold_2;HRSCAF_3)	4e	gene-LOC140006095	LOC140006095	LOC140006095	protein_coding	uncharacterized LOC140006095
arabica_cultivated__vs__arabica_introgressed::chr_D_sg_C_(Scaffold_1;HRSCAF_2)::sgE	arabica_cultivated__vs__arabica_introgressed	chr_D_sg_E_(Scaffold_2;HRSCAF_3)	4e	gene-LOC113741405	LOC113741405	LOC113741405	protein_coding	calcium-dependent protein kinase-like	kinase_signaling
arabica_cultivated__vs__arabica_introgressed::chr_D_sg_C_(Scaffold_1;HRSCAF_2)::sgE	arabica_cultivated__vs__arabica_introgressed	chr_D_sg_E_(Scaffold_2;HRSCAF_3)	4e	gene-LOC113740916	LOC113740916	LOC113740916	protein_coding	uncharacterized LOC113740916
arabica_cultivated__vs__arabica_introgressed::chr_D_sg_C_(Scaffold_1;HRSCAF_2)::sgE	arabica_cultivated__vs__arabica_introgressed	chr_D_sg_E_(Scaffold_2;HRSCAF_3)	4e	gene-LOC140004096	LOC140004096	LOC140004096	protein_coding	NF-X1-type zinc finger protein NFXL1-like
arabica_cultivated__vs__arabica_introgressed::chr_D_sg_C_(Scaffold_1;HRSCAF_2)::sgE	arabica_cultivated__vs__arabica_introgressed	chr_D_sg_E_(Scaffold_2;HRSCAF_3)	4e	gene-LOC113742191	LOC113742191	LOC113742191	protein_coding	glutamine synthetase nodule isozyme
arabica_cultivated__vs__arabica_introgressed::chr_D_sg_C_(Scaffold_1;HRSCAF_2)::sgE	arabica_cultivated__vs__arabica_introgressed	chr_D_sg_E_(Scaffold_2;HRSCAF_3)	4e	gene-LOC140005754	LOC140005754	LOC140005754	lncRNA	uncharacterized LOC140005754
[truncated: 255 more rows]

[truncated: 2 more sheets: S6_candidate_gene_summary, S7_crosswalk_diagnostics]
