# Supplementary material
Source: Research Square preprint supplement (doi:10.21203/rs.3.rs-9818054/v1)
Supplement: Supplementary file 2 [file f6f0e2523a4fd2056148f9b1.xlsx]

## Sheet: Guide
Supplementary Data S1. Expanded numerical outputs underlying Figures 1-4 and Tables S1-S7.
This workbook contains cleaned, submission-facing numerical outputs derived from public Coffea arabica genomic resources. Local file paths, input inventories, script-specific staging sheets, and redundant duplicate sheets were removed.
sheet_name	description
Direction_evidence_summary	Ranked evidence summary for manuscript directions and contrast-level interpretations.
Panel_summary	Raw panel composition summary with cleaned category labels.
Common_panel	Matched common accession panel retained across both subgenomes.
Accession_evidence_all	Full accession-level evidence matrix across affinity, asymmetry, and combined evidence metrics.
Group_relationships	Pairwise group relationships based on subgenome-resolved similarity and PCA centroid summaries.
Group_parental_summary	Group-level summaries of parental affinity and subgenome-asymmetry metrics.
Cultivated_candidates	Cultivated arabica accessions ranked by combined evidence metrics.
Introgressed_references	Introgressed arabica accessions ranked as reference accessions for the introgression axis.
Wild_candidates	Wild arabica accessions ranked by combined evidence metrics.
Asymmetry_candidates	Arabica accessions ranked by subgenome-asymmetry evidence.
Shared_hotspots_all	Full shared hotspot evidence table across both subgenomes.
Same_contig_nonoverlap	Same-contig but non-overlapping hotspot evidence retained for comparison.
Subgenome_specific_hotspots	Hotspot intervals retained in one subgenome without a same-contig counterpart.
Contrast_consensus	Contrast-level support metrics integrating marker effects and hotspot concordance.
sgC_top_markers	Top marker rows for subgenome C contrast summaries.
sgE_top_markers	Top marker rows for subgenome E contrast summaries.
PCA_scores_sgC	Subgenome C PCA scores for the common panel.
PCA_scores_sgE	Subgenome E PCA scores for the common panel.
Final_accession_shortlist	Integrated accession shortlist across role-defined priority categories.
Primary_accession_shortlist	Primary accession shortlist used for the cultivated-introgressed interpretation.
Accession_role_matrix	Expanded role matrix underlying accession prioritization.
Final_hotspot_shortlist	Integrated hotspot shortlist across shared, same-contig, and subgenome-specific categories.
Final_shared_hotspots	All retained shared hotspots.
Primary_shared_hotspots	Primary shared hotspot rows supporting the cultivated-introgressed axis.
Final_subgenome_specific	All retained subgenome-specific hotspot rows.
Primary_subgenome_specific	Primary subgenome-specific hotspot rows retained for comparison.
Marker_support_shared	Top marker rows supporting retained shared hotspots.
Primary_contrast_support	Highest-ranked contrast support summary.
Alternative_directions	Alternative evidence directions ranked below the primary interpretation.
Label_rescue_readiness	Summary of annotation-readiness after chromosome-label coordinate rescue.
sgC_label_dictionary	Subgenome C RefSeq chromosome-label dictionary parsed from GFF3 region features.
sgE_label_dictionary	Subgenome E RefSeq chromosome-label dictionary parsed from GFF3 region features.
Rescued_shared_sgC_map	Primary shared hotspot interval transferred to subgenome C annotation coordinates.
Rescued_shared_sgE_map	Primary shared hotspot interval transferred to subgenome E annotation coordinates.
Rescued_shared_sgC_genes	Genes overlapping the rescued primary shared hotspot in subgenome C.
Rescued_shared_sgE_genes	Genes overlapping the rescued primary shared hotspot in subgenome E.
Rescued_subgenome_specific	Subgenome-specific hotspot intervals after annotation-coordinate rescue.
Rescued_candidate_genes	Candidate genes prioritized from rescued hotspot overlaps.
Label_rescue_diagnostics	Diagnostic metrics for chromosome-label coordinate rescue and gene recovery.

## Sheet: Source_data
resource	identifier	files_or_materials_used	url
Dryad dataset for Salojärvi et al. 2024	doi:10.5061/dryad.qnk98sfpt	Accession_info.xlsx; Arabica_sgC.TIP.BB.vcf.gz; Arabica_sgE.TIP.BB.vcf.gz; Coffea_syntenic_alignments.tar.gz; README.md	https://datadryad.org/dataset/doi:10.5061/dryad.qnk98sfpt
Zenodo Coffea assemblies and annotations	doi:10.5281/zenodo.17250347	C_arabica_ET39_sgC.gff3; C_arabica_ET39_sgE.gff3; C_arabica_ET39_sgC.fasta; C_arabica_ET39_sgE.fasta	https://zenodo.org/records/17250347
NCBI Datasets assembly metadata	GCA_036785775.1	assembly_data_report.jsonl and associated assembly metadata context	https://www.ncbi.nlm.nih.gov/datasets/genome/GCA_036785775.1/

## Sheet: Analysis_parameters
parameter	value	note
new_sequence_data_generated	No	All analyses used public processed genomic resources.
matched_panel_size	44	Accessions retained in the common subgenome-resolved analysis panel.
subgenomes_analyzed	C and E	Canephora-derived and eugenioides-derived subgenomes.
variant_type	biallelic SNPs	Analyses were restricted to biallelic SNPs.
minimum_site_call_rate	0.8	Minimum site call rate for analysis-ready variants.
minimum_minor_allele_frequency	0.05	Minimum MAF for analysis-ready variants.
maximum_analysis_variants_per_subgenome	12000	Deterministic reservoir-sampled variant count used for ordination, similarity, and contrast summaries.
similarity_metric	1 - |di - dj| / 2	Identity-by-state-like dosage similarity averaged across retained SNPs.
primary_contrast	cultivated arabica vs introgressed arabica	Highest-supported contrast in the final evidence summary.
annotation_transfer_strategy	chromosome-label rescue with length scaling	Used to transfer hotspot intervals into RefSeq annotation coordinates.
candidate_gene_classes	defense receptor; kinase signaling; stress response; transcriptional regulation; membrane transport	Annotation-supported keyword classes used for candidate prioritization.
local_paths_removed	Yes	Local directory paths and input inventory sheets were removed from this final workbook.

## Sheet: Direction_evidence_summary
direction_type	direction_label	candidate_focus	support_metric_1	support_metric_1_name	support_metric_2	support_metric_2_name	support_metric_3	support_metric_3_name	support_metric_4	support_metric_4_name	composite_support_score	support_scope	source_key	recommended_rank	is_primary_recommendation
shared_hotspot	Shared hotspot architecture: arabica cultivated vs arabica introgressed	cross-subgenome hotspot architecture	4	n_shared_hotspots	0.95	max_consensus_hotspot_percentile	332	max_combined_n_markers_hotspot	0.776307	mean_combined_mean_abs_delta_af	0.875	shared hotspot architecture	arabica_cultivated__vs__arabica_introgressed	1	TRUE
contrast	arabica cultivated vs arabica introgressed	contrast-first manuscript	0.814911	mean_abs_delta_af_average	194	n_markers_delta_ge_0_90_total	4	n_overlapping_hotspot_pairs	0.51625	mean_consensus_hotspot_percentile	0.77825	panel-wide contrast architecture	arabica_cultivated__vs__arabica_introgressed	2	FALSE
subgenome_specific_hotspots	Subgenome-specific hotspot architecture	subgenome-specific hotspot shortlist	0.966184	mean_top_subgenome_specific_support_percentile	0.782429	mean_top_mean_abs_delta_af	32	sum_top_n_markers_hotspot	2	n_contrasts_represented	0.677617	subgenome-specific architecture	top_subgenome_specific_hotspots	3	FALSE
contrast	arabica cultivated vs arabica wild	contrast-first manuscript	0.617375	mean_abs_delta_af_average	8	n_markers_delta_ge_0_90_total	21	n_overlapping_hotspot_pairs	0.520714	mean_consensus_hotspot_percentile	0.629143	panel-wide contrast architecture	arabica_cultivated__vs__arabica_wild	4	FALSE
introgressed_reference	Introgressed reference accessions as breeding anchors	introgressed accession shortlist	0.720085	mean_top_combined_evidence_percentile	0.0137833	mean_top_introgressed_shift	0.439501	mean_top_canephora_affinity	1	best_overall_combined_evidence_rank	0.628917	breeding reference accessions	top_introgressed_candidates	5	FALSE
shared_hotspot	Shared hotspot architecture: arabica cultivated vs arabica wild	cross-subgenome hotspot architecture	21	n_shared_hotspots	0.84	max_consensus_hotspot_percentile	62	max_combined_n_markers_hotspot	0.610852	mean_combined_mean_abs_delta_af	0.625	shared hotspot architecture	arabica_cultivated__vs__arabica_wild	6	FALSE
accession_asymmetry	Subgenome asymmetry across the accession panel	accession-level asymmetry	0.653205	mean_top_asymmetry_percentile	0.539423	mean_top_combined_evidence_percentile	2	n_analysis_groups_in_top_asymmetry_set	1	best_overall_subgenome_asymmetry_rank	0.619765	accession-level asymmetric structure	top_asymmetry_candidates	7	FALSE
same_contig_nonoverlap	Same-contig but non-overlapping hotspot architecture	offset hotspot support	0.627841	mean_top_same_contig_support_percentile	0.835626	mean_top_combined_mean_abs_delta_af	26	sum_top_combined_n_markers_hotspot	2	n_contrasts_represented	0.58428	same-contig offset hotspot architecture	top_same_contig_nonoverlap	8	FALSE
wild_transition	Wild transition accessions as diversification anchors	wild accession shortlist	0.627804	mean_top_combined_evidence_percentile	0.00723712	mean_top_wild_shift	0.560096	mean_top_subgenome_asymmetry_percentile	5	best_overall_combined_evidence_rank	0.584268	wild accession shortlist	top_wild_candidates	9	FALSE

## Sheet: Panel_summary
summary_type	category	n_accessions	n_unique_accessions	n_countries
overall	all_accessions	44	44	10
analysis_group	arabica_cultivated	15	15
analysis_group	arabica_introgressed	6	6
analysis_group	arabica_wild	18	18
analysis_group	canephora	3	3
analysis_group	eugenioides	2	2
species_name	Coffea arabica	39	39
species_name	Coffea canephora	3	3
species_name	Coffea eugenioides	2	2
variety	Cultivated	17	17
variety	Introgressed	6	6
variety	Wild	21	21
country_of_origin	Brazil	15	15
country_of_origin	Ethiopia	18	18
country_of_origin	France	3	3
country_of_origin	France (La Réunion)	1	1
country_of_origin	Great-Britain	1	1
country_of_origin	Indonesia	2	2
country_of_origin	Kenya	1	1
country_of_origin	The Netherlands	1	1
country_of_origin	Uganda	2	2
genome_structure	C	3	3
genome_structure	CaEa	39	39
genome_structure	E	2	2

## Sheet: Common_panel
sgC_sample_id	sgC_total_sites	sgC_called_sites	sgC_missing_sites	sgC_call_rate_all_sites	sgC_biallelic_snp_sites	sgC_called_biallelic_snp_sites	sgC_call_rate_biallelic_snps	sgC_het_biallelic_snp_sites	sgC_heterozygosity_rate_biallelic_snps	sgC_nonref_biallelic_snp_sites	sgC_non_reference_rate_biallelic_snps	sgC_mean_depth	canonical_seq_id	sgC_rescue_status	sgC_rescue_method	sgE_sample_id	sgE_total_sites	sgE_called_sites	sgE_missing_sites	sgE_call_rate_all_sites	sgE_biallelic_snp_sites	sgE_called_biallelic_snp_sites	sgE_call_rate_biallelic_snps	sgE_het_biallelic_snp_sites	sgE_heterozygosity_rate_biallelic_snps	sgE_nonref_biallelic_snp_sites	sgE_non_reference_rate_biallelic_snps	sgE_mean_depth	sgE_rescue_status	sgE_rescue_method	seq_id	accession_name	species_name	variety	location_code	country_of_origin	Latitude	Longitude	altitude	ploidy_level	genome_size_gb	genome_structure	donor_institute	collection_location	notes	ref	full_reference	analysis_group	has_latitude
1	39754989	36481779	3273210	0.917665	32794313	30315050	0.9244	1754528	0.0578765	2203226	0.0726776	22.3054	1	matched	exact	1	42251958	39019263	3232695	0.92349	34795708	32367628	0.930219	1744379	0.0538927	2186717	0.0675588	22.3815	matched	exact	1	Ar8	Coffea arabica	Wild	Wush-Wush, Ilubabor Prov.	Ethiopia	7.3088	36.1091	1860	4	1.3	CaEa	R&D Nestlé	Nanegal, Ecuador	Ethiopian accession used as female Parent for genetic map, IRD recollection mission 1966.	Guillaumet & Hallé 1978	Guillaumet, J.-L. & Hallé, F. (1978) Echantillonnage du matériel Coffea arabica récolté en Ethiopie. Bulletin IFCC, 13-18.	arabica_wild	TRUE
10	39754989	36194316	3560673	0.910435	32794313	30054920	0.916467	2912809	0.0969162	3787014	0.126003	36.7746	10	matched	exact	10	42251958	38905567	3346391	0.920799	34795708	32242003	0.926609	2907316	0.0901717	3795144	0.117708	37.2662	matched	exact	10	Iapar 59	Coffea arabica	Introgressed	IAPAR, Londrina, PR	Brazil	-23.3518	-51.1516	580	4	1.3	CaEa	IAPAR	Londrina, PR, Brazil	Cross between H. timor HT832/2 x Villa Sarchi. Parent to Sarchimores			arabica_introgressed	TRUE
11	39754989	36309094	3445895	0.913322	32794313	30136378	0.918951	3790877	0.125791	4678040	0.155229	36.3151	11	matched	exact	11	42251958	39000337	3251621	0.923042	34795708	32314687	0.928697	3819403	0.118194	4713728	0.14587	35.7856	matched	exact	11	H.Timor	Coffea arabica	Introgressed	IAPAR, Londrina, PR	Brazil	-23.3518	-51.1516	580	4	1.3	CaEa	IAPAR	Londrina, PR, Brazil	HT832/2 - Accession Introgressed with C. canephora			arabica_introgressed	TRUE
12	39754989	36323087	3431902	0.913674	32794313	30167798	0.919909	1825842	0.0605229	2314296	0.0767141	26.9791	12	matched	exact	12	42251958	38841540	3410418	0.919284	34795708	32200763	0.925423	1814122	0.0563379	2296057	0.0713044	27.0995	matched	exact	12	M.Novo	Coffea arabica	Cultivated	IAPAR, Londrina, PR	Brazil	-23.3518	-51.1516	580	4	1.3	CaEa	IAPAR	Londrina, PR, Brazil	Typica (from Sumatra) x Bourbon	Carvalho et al. 1952	Carvalho, A. et al . Melhoramento do cafeeiro: IV - Café Mundo Novo. Bragantia, Campinas , v. 12, n. 4-6, p. 97-130, June 1952 . https://doi.org/10.1590/S0006-87051952000200001.	arabica_cultivated	TRUE
13	39754989	36768465	2986524	0.924877	32794313	30520106	0.930652	1935208	0.0634076	2441678	0.0800023	33.9626	13	matched	exact	13	42251958	39307997	2943961	0.930324	34795708	32570296	0.936043	1922772	0.0590345	2422876	0.0743891	34.076	matched	exact	13	Bourbon	Coffea arabica	Cultivated	IAPAR, Londrina, PR	Brazil	-15.5956	-47.7311	1000	4	1.3	CaEa	IAPAR	Londrina, PR, Brazil	A Typica mutant, Bourbon Variety after mass selection	Bourbon Tekisic El Salvador	González, J.A., TEKISIC: an improved Bourbon variety [Coffea arabica L. El Salvador. Agricultura en El Salvador (El Salvador). v. 15(3) p. 3-4. Jul 1976	arabica_cultivated	TRUE
14	39754989	36628637	3126352	0.92136	32794313	30416743	0.927501	1954596	0.0642605	2417873	0.0794915	27.036	14	matched	exact	14	42251958	39164838	3087120	0.926935	34795708	32467115	0.933078	1941743	0.0598065	2398503	0.0738748	27.1534	matched	exact	14	Geisha	Coffea arabica	Cultivated	Gesha, Ethiopia	Ethiopia	6.7	35.4667	1600-1800	4	1.3	CaEa	IAPAR	Londrina, PR, Brazil	Independent of Yemen cultivars, Ethiopian wild accession found near the town of Gesha (1931) and directly put to field. No known relationship with Bourbon/Typica.			arabica_cultivated	TRUE
15	39754989	36704541	3050448	0.923269	32794313	30497557	0.929965	2099280	0.0688344	2442193	0.0800783	23.2597	15	matched	exact	15	42251958	39286395	2965563	0.929812	34795708	32583424	0.936421	2083494	0.0639434	2422632	0.0743517	23.4305	matched	exact	15	Eth28.2	Coffea arabica	Wild	Kefa Prov.	Ethiopia				4	1.3	CaEa	R&D Nestlé	Ethiopia	Ethiopian accession, Seeds from Jimma Agricultural Research Centre, Ethiopian Institute of Agricultural Research -JARC/EIAR	Alemayehu et al. 2010	Alemayehu T., Crouzillat D., Petiard V., and P. Brouhan (2010). Genetic Diversity of Arabica Coffee (Coffea Arabica L.) Collections, Ethiopian Journal of Applied Science and Technology, 1:63-79	arabica_wild	FALSE
16	39754989	35987503	3767486	0.905232	32794313	29912169	0.912115	2438032	0.0815064	3155206	0.105482	20.9561	16	matched	exact	16	42251958	38665378	3586580	0.915114	34795708	32072081	0.921725	2432899	0.0758572	3156594	0.0984219	21.2327	matched	exact	16	IPR99	Coffea arabica	Introgressed	IAPAR, Londrina, PR	Brazil	-23.3518	-51.1516	580	4	1.3	CaEa	IAPAR	Londrina, PR, Brazil	Cultivar Introgressed with C. canephora - HT832/2	Sera et al. 2013	Sera, Tumoru et al . IPR 99 - Cultivar de café arábica de porte compacto resistente à mancha anular. Crop Breed. Appl. Biotechnol., Viçosa , v. 13, n. 1, p. 91-94, Mar. 2013 .	arabica_introgressed	TRUE
17_BMJM	39754989	36819171	2935818	0.926152	32794313	30573653	0.932285	1931588	0.0631782	2374359	0.0776603	26.7004	17_BMJM	matched	exact	17_BMJM	42251958	39327870	2924088	0.930794	34795708	32600731	0.936918	1919841	0.0588895	2357018	0.0722995	26.9918	matched	exact	17_BMJM	BMJM	Coffea arabica	Cultivated	Planaltina DF	Brazil	-15.5956	-47.7311	1000	4	1.3	CaEa	EMBRAPA	Cerrado Center,DF, Brazil	C. arabica bourbon (Blue Mountain) from Jamaica can be considered as cultivated but with very few breeding cycles. British introduced coffee to Jamaica in 1730 using Typica obtained from French in Martinique.			arabica_cultivated	TRUE
18_E123	39754989	36788229	2966760	0.925374	32794313	30560981	0.931899	1923347	0.0629347	2351791	0.076954	23.0264	18_E123	matched	exact	18_E123	42251958	39264819	2987139	0.929302	34795708	32563364	0.935844	1911788	0.0587098	2334672	0.0716963	23.0843	matched	exact	18_E123	E123	Coffea arabica	Wild	Beru, Maji, Kefa Prov.	Ethiopia	6.25	35.2333		4	1.3	CaEa	EMBRAPA	Cerrado Center,DF, Brazil	Ethiopian accession, Seeds from CATIE, FAO collection 1964	Meyer et al. 1968	Meyer, A.J.T., Fernie, L.M., Narasimhaswami, R.L., Monaco, L.C. & Greathead, D.J. (1968) FAO Coffee Mission to Ethiopia 1964-65. FAO, Rome	arabica_wild	TRUE
19_E237	39754989	36968773	2786216	0.929915	32794313	30694227	0.935962	2077115	0.0676712	2547697	0.0830025	30.2852	19_E237	matched	exact	19_E237	42251958	39495732	2756226	0.934767	34795708	32733464	0.940733	2063692	0.0630453	2528052	0.0772314	30.3503	matched	exact	19_E237	E237	Coffea arabica	Wild	Yirgalem, Bira, Sidamo	Ethiopia	6.43611	38.4556		4	1.3	CaEa	EMBRAPA	Cerrado Center,DF, Brazil	Ethiopian accession, Seeds from CATIE, FAO collection 1964	Meyer et al. 1968	Meyer, A.J.T., Fernie, L.M., Narasimhaswami, R.L., Monaco, L.C. & Greathead, D.J. (1968) FAO Coffee Mission to Ethiopia 1964-65. FAO, Rome	arabica_wild	TRUE
2	39754989	36711961	3043028	0.923455	32794313	30482404	0.929503	1893621	0.0621218	2372003	0.0778155	32.7197	2	matched	exact	2	42251958	39249128	3002830	0.92893	34795708	32535039	0.93503	1881078	0.057817	2353254	0.0723298	32.8941	matched	exact	2	Ar17-05	Coffea arabica	Wild	Gimma-Gore Prov.	Ethiopia	8.14583	35.5294	1350	4	1.3	CaEa	R&D Nestlé	Nanegal, Ecuador	Ethiopian accession, IRD recollection mission 1966.	Guillaumet & Hallé 1978	Guillaumet, J.-L. & Hallé, F. (1978) Echantillonnage du matériel Coffea arabica récolté en Ethiopie. Bulletin IFCC, 13-18.	arabica_wild	TRUE
20_E261	39754989	36889178	2865811	0.927913	32794313	30637458	0.934231	1864691	0.0608631	2350688	0.0767259	28.3047	20_E261	matched	exact	20_E261	42251958	39459826	2792132	0.933917	34795708	32712232	0.940123	1853701	0.0566669	2334185	0.0713551	28.4387	matched	exact	20_E261	E261	Coffea arabica	Wild	Doyo, Kefa Prov.	Ethiopia	7.61667	36.7667	1770	4	1.3	CaEa	EMBRAPA	Cerrado Center,DF, Brazil	Ethiopian accession, Seeds from CATIE, FAO collection 1964	Meyer et al. 1968	Meyer, A.J.T., Fernie, L.M., Narasimhaswami, R.L., Monaco, L.C. & Greathead, D.J. (1968) FAO Coffee Mission to Ethiopia 1964-65. FAO, Rome	arabica_wild	TRUE
21_E383	39754989	37295198	2459791	0.938126	32794313	30947932	0.943698	2007958	0.0648818	2489167	0.0804308	39.1573	21_E383	matched	exact	21_E383	42251958	39844427	2407531	0.94302	34795708	33009485	0.948665	1995921	0.0604651	2471505	0.0748726	39.2928	matched	exact	21_E383	E383	Coffea arabica	Wild	Kefa Prov.	Ethiopia	7.71667	36.3	1900	4	1.3	CaEa	EMBRAPA	Cerrado Center,DF, Brazil	Ethiopian accession, Seeds from CATIE, FAO collection 1964	Meyer et al. 1968	Meyer, A.J.T., Fernie, L.M., Narasimhaswami, R.L., Monaco, L.C. & Greathead, D.J. (1968) FAO Coffee Mission to Ethiopia 1964-65. FAO, Rome	arabica_wild	TRUE
22_E516	39754989	37069374	2685615	0.932446	32794313	30770006	0.938273	1999023	0.0649666	2507770	0.0815005	37.2886	22_E516	matched	exact	22_E516	42251958	39588454	2663504	0.936961	34795708	32798874	0.942613	1987021	0.060582	2489616	0.0759055	37.4273	matched	exact	22_E516	E516	Coffea arabica	Wild	Tunteta, Kefa Prov.	Ethiopia	6.86667	35.45	1620	4	1.3	CaEa	EMBRAPA	Cerrado Center,DF, Brazil	Ethiopian accession, Seeds from CATIE, FAO collection 1964	Meyer et al. 1968	Meyer, A.J.T., Fernie, L.M., Narasimhaswami, R.L., Monaco, L.C. & Greathead, D.J. (1968) FAO Coffee Mission to Ethiopia 1964-65. FAO, Rome	arabica_wild	TRUE
23_Erecta	39754989	37136061	2618928	0.934123	32794313	30825464	0.939964	2039772	0.0661717	2570956	0.0834036	36.4229	23_Erecta	matched	exact	23_Erecta	42251958	39637641	2614317	0.938126	34795708	32844466	0.943923	2027514	0.0617308	2552196	0.0777055	36.6092	matched	exact	23_Erecta	Erecta	Coffea arabica	Cultivated	Planaltina DF	Brazil	-15.5956	-47.7311	1000	4	1.3	CaEa	EMBRAPA	Cerrado Center,DF, Brazil	C. arabica Typica mutant probably from Java - indonesia	Carvalho 2008	Carvalho, C.H.S. de. (Ed.). Cultivares de café: origem, características e recomendações. Brasília: Embrapa Café, 2008a. v.1, p.284-285	arabica_cultivated	TRUE
24_ET59	39754989	37217691	2537298	0.936177	32794313	30897120	0.942149	2075480	0.0671739	2500748	0.0809379	30.5707	24_ET59	matched	exact	24_ET59	42251958	39793918	2458040	0.941824	34795708	32976420	0.947715	2061949	0.062528	2481988	0.0752655	30.726	matched	exact	24_ET59	ET59	Coffea arabica	Wild	Bonga, Kefa Prov.	Ethiopia	7.28443	36.2563	1750	4	1.3	CaEa	EMBRAPA	Cerrado Center,DF, Brazil	Ethiopian accession related to Ar59			arabica_wild	TRUE
25_JK1	39754989	36808521	2946468	0.925884	32794313	30570679	0.932195	1897931	0.0620834	2401993	0.0785718	27.6044	25_JK1	matched	exact	25_JK1	42251958	39330767	2921191	0.930863	34795708	32605299	0.937049	1886638	0.0578629	2384906	0.0731447	27.7845	matched	exact	25_JK1	JK1	Coffea arabica	Cultivated	Planaltina DF	Brazil	-15.5956	-47.7311	1000	4	1.3	CaEa	EMBRAPA	Cerrado Center,DF, Brazil	"Jackson 1" - Indian variety, originates from 7 seeds smuggled out from Yemen by Baba Buda. Belongs to "Typica" haplogroup			arabica_cultivated	TRUE
26_Moka	39754989	36653896	3101093	0.921995	32794313	30451096	0.928548	1827921	0.0600281	2317379	0.0761017	24.0707	26_Moka	matched	exact	26_Moka	42251958	39177536	3074422	0.927236	34795708	32488465	0.933692	1816794	0.0559212	2300051	0.0707959	24.1917	matched	exact	26_Moka	Moka	Coffea arabica	Cultivated	Planaltina DF	Brazil	-15.5956	-47.7311	1000	4	1.3	CaEa	EMBRAPA	Cerrado Center,DF, Brazil	Bourbon mutant			arabica_cultivated	TRUE
27_Rubi	39754989	37154687	2600302	0.934592	32794313	30835080	0.940257	2042413	0.0662367	2584561	0.0838189	38.9635	27_Rubi	matched	exact	27_Rubi	42251958	39665851	2586107	0.938793	34795708	32861110	0.944401	2030317	0.0617848	2565673	0.0780763	39.1273	matched	exact	27_Rubi	Rubi	Coffea arabica	Cultivated	Planaltina DF	Brazil	-15.5956	-47.7311	1000	4	1.3	CaEa	EMBRAPA	Cerrado Center,DF, Brazil	C. arabica cultivar issued from a cross between Catuaí Vermelho and Mundo Novo	Carvalho 2008	Carvalho, C.H.S. de. (Ed.). Cultivares de café: origem, características e recomendações. Brasília: Embrapa Café, 2008a. v.1, p.284-285	arabica_cultivated	TRUE
28_Topazio	39754989	36983890	2771099	0.930296	32794313	30708713	0.936404	1972483	0.064232	2498951	0.081376	32.102	28_Topazio	matched	exact	28_Topazio	42251958	39470888	2781070	0.934179	34795708	32715670	0.940221	1960820	0.0599352	2480470	0.075819	31.7455	matched	exact	28_Topazio	Topazio	Coffea arabica	Cultivated	Planaltina DF	Brazil	-15.5956	-47.7311	1000	4	1.3	CaEa	EMBRAPA	Cerrado Center,DF, Brazil	C. arabica cultivar issued from a cross between Catuaí Amarelo and Mundo Novo	Carvalho 2008	Carvalho, C.H.S. de. (Ed.). Cultivares de café: origem, características e recomendações. Brasília: Embrapa Café, 2008a. v.1, p.284-285	arabica_cultivated	TRUE
29_CostaRica95	39754989	36645050	3109939	0.921772	32794313	30410101	0.927298	2394618	0.0787442	3219482	0.105869	39.9605	29_CostaRica95	matched	exact	29_CostaRica95	42251958	39394100	2857858	0.932362	34795708	32633957	0.937873	2379289	0.0729084	3211056	0.0983962	40.3522	matched	exact	29_CostaRica95	Costa Rica 95	Coffea arabica	Introgressed	Nestlé greenhouses, Tours	France				4	1.3	CaEa	R&D Nestlé		Descendant of HT832/1 x Caturra - Catimores			arabica_introgressed	FALSE
3	39754989	36735749	3019240	0.924054	32794313	30504379	0.930173	1902543	0.0623695	2394425	0.0784945	33.4955	3	matched	exact	3	42251958	39330080	2921878	0.930846	34795708	32601962	0.936954	1890610	0.0579907	2376853	0.0729052	33.6835	matched	exact	3	Ar36B	Coffea arabica	Wild	Kollo, Kefa Prov.	Ethiopia	6.14325	35.5868	1460	4	1.3	CaEa	R&D Nestlé	Nanegal, Ecuador	Ethiopian accession used as male Parent for genetic map, IRD recollection mission 1966.	Guillaumet & Hallé 1978	Guillaumet, J.-L. & Hallé, F. (1978) Echantillonnage du matériel Coffea arabica récolté en Ethiopie. Bulletin IFCC, 13-18.	arabica_wild	TRUE
30_OroAzteca	39754989	36460815	3294174	0.917138	32794313	30256449	0.922613	2829860	0.0935292	3858730	0.127534	42.3243	30_OroAzteca	matched	exact	30_OroAzteca	42251958	39336310	2915648	0.930994	34795708	32582466	0.936393	2811279	0.086282	3857126	0.11838	42.8827	matched	exact	30_OroAzteca	Oro Azteca	Coffea arabica	Introgressed	Nestlé greenhouses, Tours	France				4	1.3	CaEa	R&D Nestlé		Descendant of HT832/1 x Caturra - Catimores			arabica_introgressed	FALSE
31_ArabustaPizze	39754989	37161406	2593583	0.934761	32794313	30879409	0.941609	7443053	0.241036	7916177	0.256358	36.2547	31_ArabustaPizze	matched	exact	31_ArabustaPizze	42251958	39625322	2626636	0.937834	34795708	32870600	0.944674	7590675	0.230926	8056098	0.245085	28.3986	matched	exact	31_ArabustaPizze	Arabusta Pizze	Coffea arabica	Introgressed	Nestlé greenhouses, Tours	France				4	1.3	CaEa	R&D Nestlé	Tours, France	Arabusta generally designate first generation hybrids C. arabica X C. canephora (4n) made by IFCC in the 70s			arabica_introgressed	FALSE
32_Bourbonpointu	39754989	36793296	2961693	0.925501	32794313	30563831	0.931986	1850091	0.060532	2349133	0.0768599	23.4867	32_Bourbonpointu	matched	exact	32_Bourbonpointu	42251958	39299671	2952287	0.930127	34795708	32586580	0.936511	1839613	0.0564531	2332286	0.071572	23.6515	matched	exact	32_Bourbonpointu	Bourbon pointu	Coffea arabica	Cultivated	La Réunion Island	France (La Réunion)	-21.313	55.5114		4	1.3	CaEa	IRD	La Réunion, France	Bourbon mutant "Laurina" originating from island of Bourbon (Reunion). Many phenotypic differences to Bourbon, genetics behaves as a single locus mutant.	Lécolier (2006)	Lécolier A. (2006) Caractérisation de certains impacts de la mutation Laurina chez Coffea arabica L. aux niveaux histo-morphologique et moléculaire. Thèse de doctorat Univ. de la Réunion	arabica_cultivated	TRUE
37_Catuai99	39754989	36850469	2904520	0.926939	32794313	30603380	0.933192	1915315	0.0625851	2425514	0.0792564	27.105	37_Catuai99	matched	exact	37_Catuai99	42251958	39357455	2894503	0.931494	34795708	32626972	0.937672	1904171	0.0583619	2407812	0.0737982	27.2158	matched	exact	37_Catuai99	Catuai99	Coffea arabica	Cultivated	Planaltina DF	Brazil	-15.5956	-47.7311	1000	4	1.3	CaEa	EMBRAPA	Cerrado Center,DF, Brazil	Issued from a cross between Mundo Novo and Caturra (Caturra is a mutated Bourbon)			arabica_cultivated	TRUE
38_Et38C3	39754989	37049074	2705915	0.931935	32794313	30763817	0.938084	1981337	0.0644048	2354590	0.0765376	29.1413	38_Et38C3	matched	exact	38_Et38C3	42251958	39648222	2603736	0.938376	34795708	32864246	0.944491	1969362	0.0599241	2338731	0.0711634	29.2138	matched	exact	38_Et38C3	Et38C3	Coffea arabica	Wild	Shasa, Kefa Prov.	Ethiopia	7.18407	38.7161		4	1.3	CaEa	EMBRAPA	Cerrado Center,DF, Brazil	Ethiopian accession			arabica_wild	TRUE
39_Guatemalense	39754989	37024447	2730542	0.931316	32794313	30737646	0.937286	2011553	0.0654426	2517231	0.0818941	33.0499	39_Guatemalense	matched	exact	39_Guatemalense	42251958	39549280	2702678	0.936034	34795708	32775514	0.941941	2000208	0.0610275	2499917	0.0762739	33.2598	matched	exact	39_Guatemalense	Guatemalense	Coffea arabica	Cultivated	Planaltina DF	Brazil	-15.5956	-47.7311	1000	4	1.3	CaEa	EMBRAPA	Cerrado Center,DF, Brazil	Cross between C. arabica dwarf Typica mutant "Pache colis" found in Mataquescuintla (Guatemala) and Caturra			arabica_cultivated	TRUE
4	39754989	36753615	3001374	0.924503	32794313	30518694	0.930609	2107210	0.0690465	2558636	0.0838383	29.6152	4	matched	exact	4	42251958	39295883	2956075	0.930037	34795708	32573171	0.936126	2092100	0.0642277	2537191	0.077892	29.7073	matched	exact	4	Ar02-05	Coffea arabica	Wild	Gojeb, Kefa Prov.	Ethiopia	7.41071	36.5407	1420	4	1.3	CaEa	IRD	La Réunion, France	Ethiopian accession, IRD recollection mission 1966.	Guillaumet & Hallé 1978	Guillaumet, J.-L. & Hallé, F. (1978) Echantillonnage du matériel Coffea arabica récolté en Ethiopie. Bulletin IFCC, 13-18.	arabica_wild	TRUE
40_BU-A_Eugenioides	39754989	24906718	14848271	0.626505	32794313	20398590	0.622016	4661235	0.228508	9994710	0.489971	31.1415	40_BU-A	rescued	normalized:40_BU-A	40_BU-A_Eugenioides	42251958	27887922	14364036	0.660039	34795708	22850602	0.656707	3852338	0.168588	6402088	0.280172	30.2199	rescued	normalized:40_BU-A	40_BU-A	BU-A	Coffea eugenioides	Wild	Budongo	Uganda	1.78727	31.5074		2	0.67	E	NARO	Budango forest, Uganda	Female parental species of C. arabica. Collected in Uganda, Budango forest in 2012 (IRD/NARO)			eugenioides	TRUE
5	39754989	36759938	2995051	0.924662	32794313	30517128	0.930562	2070655	0.0678522	2500419	0.0819349	32.3921	5	matched	exact	5	42251958	39365486	2886472	0.931684	34795708	32621054	0.937502	2053439	0.0629483	2479080	0.0759963	32.4848	matched	exact	5	Ar22-05	Coffea arabica	Wild	Tippi, Ilubabor Prov.	Ethiopia	7.22812	35.382	1300	4	1.3	CaEa	IRD	La Réunion, France	Ethiopian accession, IRD recollection mission 1966.	Guillaumet & Hallé 1978	Guillaumet, J.-L. & Hallé, F. (1978) Echantillonnage du matériel Coffea arabica récolté en Ethiopie. Bulletin IFCC, 13-18.	arabica_wild	TRUE
6	39754989	36895092	2859897	0.928062	32794313	30641281	0.934347	2172956	0.070916	2526116	0.0824416	28.4393	6	matched	exact	6	42251958	39474393	2777565	0.934262	34795708	32725459	0.940503	2155953	0.06588	2504908	0.0765431	28.555	matched	exact	6	Ar35-06	Coffea arabica	Wild	Mizan-Teferi, Kefa Prov.	Ethiopia	6.96903	35.6223	1500	4	1.3	CaEa	IRD	La Réunion, France	Ethiopian accession, IRD recollection mission 1966.	Guillaumet & Hallé 1978	Guillaumet, J.-L. & Hallé, F. (1978) Echantillonnage du matériel Coffea arabica récolté en Ethiopie. Bulletin IFCC, 13-18.	arabica_wild	TRUE
7	39754989	36876233	2878756	0.927588	32794313	30615490	0.933561	1706984	0.0557556	2054403	0.0671034	30.4663	7	matched	exact	7	42251958	39429463	2822495	0.933198	34795708	32678859	0.939164	1696814	0.0519239	2040538	0.0624421	30.6228	matched	exact	7	Ar59-05	Coffea arabica	Wild	Bonga, Kefa Prov.	Ethiopia	7.28443	36.2563	1700	4	1.3	CaEa	IRD	La Réunion, France	Ethiopian accession, IRD recollection mission 1966.	Guillaumet & Hallé 1978	Guillaumet, J.-L. & Hallé, F. (1978) Echantillonnage du matériel Coffea arabica récolté en Ethiopie. Bulletin IFCC, 13-18.	arabica_wild	TRUE
8	39754989	37000378	2754611	0.93071	32794313	30713227	0.936541	2246830	0.0731551	2585713	0.0841889	33.4589	8	matched	exact	8	42251958	39565550	2686408	0.936419	34795708	32784118	0.942189	2228452	0.0679735	2564487	0.0782235	33.5368	matched	exact	8	E016/136	Coffea arabica	Wild	Shewa Prov.	Ethiopia	7.11667	38.6667	1800	4	1.3	CaEa	IAPAR	Londrina, PR, Brazil	Ethiopian accession, Seeds from CATIE, FAO collection 1964	Meyer et al. 1968	Meyer, A.J.T., Fernie, L.M., Narasimhaswami, R.L., Monaco, L.C. & Greathead, D.J. (1968) FAO Coffee Mission to Ethiopia 1964-65. FAO, Rome	arabica_wild	TRUE
9	39754989	36996260	2758729	0.930607	32794313	30706896	0.936348	2148741	0.0699758	2554963	0.0832049	34.8944	9	matched	exact	9	42251958	39572715	2679243	0.936589	34795708	32789763	0.942351	2133257	0.0650586	2535052	0.0773123	34.8875	matched	exact	9	E159/180	Coffea arabica	Wild	Gera, Kefa Prov.	Ethiopia	7.23333	36.4	2040	4	1.3	CaEa	IAPAR	Londrina, PR, Brazil	Ethiopian accession, Seeds from CATIE, FAO collection 1964	Meyer et al. 1968	Meyer, A.J.T., Fernie, L.M., Narasimhaswami, R.L., Monaco, L.C. & Greathead, D.J. (1968) FAO Coffee Mission to Ethiopia 1964-65. FAO, Rome	arabica_wild	TRUE
Amsterdam	39754989	36396284	3358705	0.915515	32794313	30271475	0.923071	1625288	0.0536904	2097463	0.0692884	14.669	Amsterdam	matched	exact	Amsterdam	42251958	38895414	3356544	0.920559	34795708	32288625	0.927948	1616387	0.0500606	2082314	0.0644906	14.7621	matched	exact	Amsterdam	Amsterdam	Coffea arabica	Cultivated	Amsterdam Botanical Garden, Amsterdam	The Netherlands				4	1.3	CaEa	Amsterdam Botanical Garden	Amsterdam, Netherlands	Bourbon variant growing in Amsterdam Botanical Gardens			arabica_cultivated	FALSE
BB1	39754989	37136244	2618745	0.934128	32794313	30840514	0.940423	2083605	0.0675606	2618041	0.0848897	37.5622	BB1	matched	exact	BB1	42251958	39654331	2597627	0.938521	34795708	32872534	0.94473	2071316	0.0630105	2599268	0.0790711	37.7518	matched	exact	BB1	BB1	Coffea arabica	Cultivated	IAC - Campinas	Brazil				4	1.3	CaEa	IAC - Campinas	Ex-situ germoplasm Collection	C. arabica variety Bourbon reference	Krug et al. 1951	Krug, C.A.; Carvalho, A. The genetics of Coffea. Advances in Genetics, v.4, p.127-158, 1951.	arabica_cultivated	FALSE
BP409_sgC	39754989	29093948	10661041	0.731831	32794313	23976074	0.731105	4269847	0.178088	6931306	0.289093	32.5235	BP409	rescued	normalized:BP409	BP409_sgE	42251958	27823007	14428951	0.658502	34795708	22850745	0.656712	4957521	0.216952	10721943	0.469216	31.2841	rescued	normalized:BP409	BP409	BP409	Coffea canephora	Cultivated	ICCRI, Jember	Indonesia	-8.2574	113.616		2	0.71	C	ICCRI	Jember, Indonesia	Parent of the F1 segregating Robusta genetic map from ICCRI (Indonesia)			canephora	TRUE
BUD15_sgC	39754989	29133739	10621250	0.732832	32794313	23982724	0.731307	3434038	0.143188	5630830	0.234787	45.2458	BUD15	rescued	normalized:BUD15	BUD15_sgE	42251958	27616969	14634989	0.653626	34795708	22669521	0.651503	4388320	0.193578	9973515	0.439953	44.6491	rescued	normalized:BUD15	BUD15	BUD15	Coffea canephora	Wild	Budongo	Uganda	1.78727	31.5074		2	0.71	C	NARO/IRD	Budango forest, Uganda	Collected in Uganda, Budango forest 2012 (IRD/NARO)			canephora	TRUE
DA56_sgC	39754989	22250558	17504431	0.559692	32794313	18383470	0.560569	2231143	0.121367	6835351	0.37182	16.9943	DA56	rescued	normalized:DA56	DA56_sgE	42251958	26799303	15452655	0.634274	34795708	22021266	0.632873	2252815	0.102302	4900734	0.222546	19.737	rescued	normalized:DA56	DA56	DA56	Coffea eugenioides	Wild	Kambiri, kakamega	Kenya	0.342977	34.8724	1660-2200	2	0.67	E	IRD	La Réunion, France	IRD collecting mission Kenya 1977	Berthaud et al. 1980	Berthaud, J., Guillaumet, J.-L., Le Pierres, D. & Lourd, M. (1980) Rapport de prospection des caféiers du Kenya. Café, Cacao, Thé, XXIV, 101-112.	eugenioides	TRUE
LINN32	39754989	23202532	16552457	0.583638	32794313	19753620	0.602349	224602	0.0113702	380511	0.0192628	3.22717	LINN32	matched	exact	LINN32	42251958	24956238	17295720	0.590653	34795708	21204138	0.609389	224263	0.0105764	378414	0.0178462	3.22329	matched	exact	LINN32	LINN_232	Coffea arabica	Wild	Linnean society, London	Great-Britain	13.3023	43.2361		4	1.3	CaEa	NHM, London		Herbarium sample from the Linnean society in London, lectotype for C. arabica, probably collected in Yemen			arabica_wild	TRUE
Q121_sgC	39754989	28448795	11306194	0.715603	32794313	23467135	0.715586	4400207	0.187505	8322312	0.354637	29.9568	Q121	rescued	normalized:Q121	Q121_sgE	42251958	27550189	14701769	0.652045	34795708	22648343	0.650895	4855904	0.214404	10962653	0.484038	29.0609	rescued	normalized:Q121	Q121	Q121	Coffea canephora	Cultivated	ICCRI, Jember	Indonesia	-8.2574	113.616		2	0.71	C	ICCRI	Jember, Indonesia	Parent of the F1 segregating Robusta genetic map from ICCRI (Indonesia)			canephora	TRUE
TIP1	39754989	37306938	2448051	0.938422	32794313	30985860	0.944855	2111983	0.0681596	2640935	0.0852303	32.7354	TIP1	matched	exact	TIP1	42251958	39808127	2443831	0.942161	34795708	33003303	0.948488	2099717	0.0636214	2622708	0.079468	32.9313	matched	exact	TIP1	TIP1	Coffea arabica	Cultivated	IAC - Campinas	Brazil				4	1.3	CaEa	IAC - Campinas	Ex-situ germoplasm Collection	C. arabica variety Typica reference	Antunes Filho et al. 1957	Antunes Filho, H.; Carvalho, A. Genética de Coffea XVI. The variety typica as a standard for genetical studies of Coffea arabica. Journal of Heredity, v.48, p.110-117, 1957.	arabica_cultivated	FALSE
[truncated: 7 more columns]

## Sheet: Accession_evidence_all
sgC_sample_id	sgC_total_sites	sgC_called_sites	sgC_missing_sites	sgC_call_rate_all_sites	sgC_biallelic_snp_sites	sgC_called_biallelic_snp_sites	sgC_call_rate_biallelic_snps	sgC_het_biallelic_snp_sites	sgC_heterozygosity_rate_biallelic_snps	sgC_nonref_biallelic_snp_sites	sgC_non_reference_rate_biallelic_snps	sgC_mean_depth	canonical_seq_id	sgC_rescue_status	sgC_rescue_method	sgE_sample_id	sgE_total_sites	sgE_called_sites	sgE_missing_sites	sgE_call_rate_all_sites	sgE_biallelic_snp_sites	sgE_called_biallelic_snp_sites	sgE_call_rate_biallelic_snps	sgE_het_biallelic_snp_sites	sgE_heterozygosity_rate_biallelic_snps	sgE_nonref_biallelic_snp_sites	sgE_non_reference_rate_biallelic_snps	sgE_mean_depth	sgE_rescue_status	sgE_rescue_method	seq_id	accession_name	species_name	variety	location_code	country_of_origin	Latitude	Longitude	altitude	ploidy_level	genome_size_gb	genome_structure	donor_institute	collection_location	notes	ref	full_reference	analysis_group	has_latitude
11	39754989	36309094	3445895	0.913322	32794313	30136378	0.918951	3790877	0.125791	4678040	0.155229	36.3151	11	matched	exact	11	42251958	39000337	3251621	0.923042	34795708	32314687	0.928697	3819403	0.118194	4713728	0.14587	35.7856	matched	exact	11	H.Timor	Coffea arabica	Introgressed	IAPAR, Londrina, PR	Brazil	-23.3518	-51.1516	580	4	1.3	CaEa	IAPAR	Londrina, PR, Brazil	HT832/2 - Accession Introgressed with C. canephora			arabica_introgressed	TRUE
31_ArabustaPizze	39754989	37161406	2593583	0.934761	32794313	30879409	0.941609	7443053	0.241036	7916177	0.256358	36.2547	31_ArabustaPizze	matched	exact	31_ArabustaPizze	42251958	39625322	2626636	0.937834	34795708	32870600	0.944674	7590675	0.230926	8056098	0.245085	28.3986	matched	exact	31_ArabustaPizze	Arabusta Pizze	Coffea arabica	Introgressed	Nestlé greenhouses, Tours	France				4	1.3	CaEa	R&D Nestlé	Tours, France	Arabusta generally designate first generation hybrids C. arabica X C. canephora (4n) made by IFCC in the 70s			arabica_introgressed	FALSE
10	39754989	36194316	3560673	0.910435	32794313	30054920	0.916467	2912809	0.0969162	3787014	0.126003	36.7746	10	matched	exact	10	42251958	38905567	3346391	0.920799	34795708	32242003	0.926609	2907316	0.0901717	3795144	0.117708	37.2662	matched	exact	10	Iapar 59	Coffea arabica	Introgressed	IAPAR, Londrina, PR	Brazil	-23.3518	-51.1516	580	4	1.3	CaEa	IAPAR	Londrina, PR, Brazil	Cross between H. timor HT832/2 x Villa Sarchi. Parent to Sarchimores			arabica_introgressed	TRUE
30_OroAzteca	39754989	36460815	3294174	0.917138	32794313	30256449	0.922613	2829860	0.0935292	3858730	0.127534	42.3243	30_OroAzteca	matched	exact	30_OroAzteca	42251958	39336310	2915648	0.930994	34795708	32582466	0.936393	2811279	0.086282	3857126	0.11838	42.8827	matched	exact	30_OroAzteca	Oro Azteca	Coffea arabica	Introgressed	Nestlé greenhouses, Tours	France				4	1.3	CaEa	R&D Nestlé		Descendant of HT832/1 x Caturra - Catimores			arabica_introgressed	FALSE
5	39754989	36759938	2995051	0.924662	32794313	30517128	0.930562	2070655	0.0678522	2500419	0.0819349	32.3921	5	matched	exact	5	42251958	39365486	2886472	0.931684	34795708	32621054	0.937502	2053439	0.0629483	2479080	0.0759963	32.4848	matched	exact	5	Ar22-05	Coffea arabica	Wild	Tippi, Ilubabor Prov.	Ethiopia	7.22812	35.382	1300	4	1.3	CaEa	IRD	La Réunion, France	Ethiopian accession, IRD recollection mission 1966.	Guillaumet & Hallé 1978	Guillaumet, J.-L. & Hallé, F. (1978) Echantillonnage du matériel Coffea arabica récolté en Ethiopie. Bulletin IFCC, 13-18.	arabica_wild	TRUE
16	39754989	35987503	3767486	0.905232	32794313	29912169	0.912115	2438032	0.0815064	3155206	0.105482	20.9561	16	matched	exact	16	42251958	38665378	3586580	0.915114	34795708	32072081	0.921725	2432899	0.0758572	3156594	0.0984219	21.2327	matched	exact	16	IPR99	Coffea arabica	Introgressed	IAPAR, Londrina, PR	Brazil	-23.3518	-51.1516	580	4	1.3	CaEa	IAPAR	Londrina, PR, Brazil	Cultivar Introgressed with C. canephora - HT832/2	Sera et al. 2013	Sera, Tumoru et al . IPR 99 - Cultivar de café arábica de porte compacto resistente à mancha anular. Crop Breed. Appl. Biotechnol., Viçosa , v. 13, n. 1, p. 91-94, Mar. 2013 .	arabica_introgressed	TRUE
15	39754989	36704541	3050448	0.923269	32794313	30497557	0.929965	2099280	0.0688344	2442193	0.0800783	23.2597	15	matched	exact	15	42251958	39286395	2965563	0.929812	34795708	32583424	0.936421	2083494	0.0639434	2422632	0.0743517	23.4305	matched	exact	15	Eth28.2	Coffea arabica	Wild	Kefa Prov.	Ethiopia				4	1.3	CaEa	R&D Nestlé	Ethiopia	Ethiopian accession, Seeds from Jimma Agricultural Research Centre, Ethiopian Institute of Agricultural Research -JARC/EIAR	Alemayehu et al. 2010	Alemayehu T., Crouzillat D., Petiard V., and P. Brouhan (2010). Genetic Diversity of Arabica Coffee (Coffea Arabica L.) Collections, Ethiopian Journal of Applied Science and Technology, 1:63-79	arabica_wild	FALSE
29_CostaRica95	39754989	36645050	3109939	0.921772	32794313	30410101	0.927298	2394618	0.0787442	3219482	0.105869	39.9605	29_CostaRica95	matched	exact	29_CostaRica95	42251958	39394100	2857858	0.932362	34795708	32633957	0.937873	2379289	0.0729084	3211056	0.0983962	40.3522	matched	exact	29_CostaRica95	Costa Rica 95	Coffea arabica	Introgressed	Nestlé greenhouses, Tours	France				4	1.3	CaEa	R&D Nestlé		Descendant of HT832/1 x Caturra - Catimores			arabica_introgressed	FALSE
6	39754989	36895092	2859897	0.928062	32794313	30641281	0.934347	2172956	0.070916	2526116	0.0824416	28.4393	6	matched	exact	6	42251958	39474393	2777565	0.934262	34795708	32725459	0.940503	2155953	0.06588	2504908	0.0765431	28.555	matched	exact	6	Ar35-06	Coffea arabica	Wild	Mizan-Teferi, Kefa Prov.	Ethiopia	6.96903	35.6223	1500	4	1.3	CaEa	IRD	La Réunion, France	Ethiopian accession, IRD recollection mission 1966.	Guillaumet & Hallé 1978	Guillaumet, J.-L. & Hallé, F. (1978) Echantillonnage du matériel Coffea arabica récolté en Ethiopie. Bulletin IFCC, 13-18.	arabica_wild	TRUE
9	39754989	36996260	2758729	0.930607	32794313	30706896	0.936348	2148741	0.0699758	2554963	0.0832049	34.8944	9	matched	exact	9	42251958	39572715	2679243	0.936589	34795708	32789763	0.942351	2133257	0.0650586	2535052	0.0773123	34.8875	matched	exact	9	E159/180	Coffea arabica	Wild	Gera, Kefa Prov.	Ethiopia	7.23333	36.4	2040	4	1.3	CaEa	IAPAR	Londrina, PR, Brazil	Ethiopian accession, Seeds from CATIE, FAO collection 1964	Meyer et al. 1968	Meyer, A.J.T., Fernie, L.M., Narasimhaswami, R.L., Monaco, L.C. & Greathead, D.J. (1968) FAO Coffee Mission to Ethiopia 1964-65. FAO, Rome	arabica_wild	TRUE
4	39754989	36753615	3001374	0.924503	32794313	30518694	0.930609	2107210	0.0690465	2558636	0.0838383	29.6152	4	matched	exact	4	42251958	39295883	2956075	0.930037	34795708	32573171	0.936126	2092100	0.0642277	2537191	0.077892	29.7073	matched	exact	4	Ar02-05	Coffea arabica	Wild	Gojeb, Kefa Prov.	Ethiopia	7.41071	36.5407	1420	4	1.3	CaEa	IRD	La Réunion, France	Ethiopian accession, IRD recollection mission 1966.	Guillaumet & Hallé 1978	Guillaumet, J.-L. & Hallé, F. (1978) Echantillonnage du matériel Coffea arabica récolté en Ethiopie. Bulletin IFCC, 13-18.	arabica_wild	TRUE
19_E237	39754989	36968773	2786216	0.929915	32794313	30694227	0.935962	2077115	0.0676712	2547697	0.0830025	30.2852	19_E237	matched	exact	19_E237	42251958	39495732	2756226	0.934767	34795708	32733464	0.940733	2063692	0.0630453	2528052	0.0772314	30.3503	matched	exact	19_E237	E237	Coffea arabica	Wild	Yirgalem, Bira, Sidamo	Ethiopia	6.43611	38.4556		4	1.3	CaEa	EMBRAPA	Cerrado Center,DF, Brazil	Ethiopian accession, Seeds from CATIE, FAO collection 1964	Meyer et al. 1968	Meyer, A.J.T., Fernie, L.M., Narasimhaswami, R.L., Monaco, L.C. & Greathead, D.J. (1968) FAO Coffee Mission to Ethiopia 1964-65. FAO, Rome	arabica_wild	TRUE
18_E123	39754989	36788229	2966760	0.925374	32794313	30560981	0.931899	1923347	0.0629347	2351791	0.076954	23.0264	18_E123	matched	exact	18_E123	42251958	39264819	2987139	0.929302	34795708	32563364	0.935844	1911788	0.0587098	2334672	0.0716963	23.0843	matched	exact	18_E123	E123	Coffea arabica	Wild	Beru, Maji, Kefa Prov.	Ethiopia	6.25	35.2333		4	1.3	CaEa	EMBRAPA	Cerrado Center,DF, Brazil	Ethiopian accession, Seeds from CATIE, FAO collection 1964	Meyer et al. 1968	Meyer, A.J.T., Fernie, L.M., Narasimhaswami, R.L., Monaco, L.C. & Greathead, D.J. (1968) FAO Coffee Mission to Ethiopia 1964-65. FAO, Rome	arabica_wild	TRUE
1	39754989	36481779	3273210	0.917665	32794313	30315050	0.9244	1754528	0.0578765	2203226	0.0726776	22.3054	1	matched	exact	1	42251958	39019263	3232695	0.92349	34795708	32367628	0.930219	1744379	0.0538927	2186717	0.0675588	22.3815	matched	exact	1	Ar8	Coffea arabica	Wild	Wush-Wush, Ilubabor Prov.	Ethiopia	7.3088	36.1091	1860	4	1.3	CaEa	R&D Nestlé	Nanegal, Ecuador	Ethiopian accession used as female Parent for genetic map, IRD recollection mission 1966.	Guillaumet & Hallé 1978	Guillaumet, J.-L. & Hallé, F. (1978) Echantillonnage du matériel Coffea arabica récolté en Ethiopie. Bulletin IFCC, 13-18.	arabica_wild	TRUE
24_ET59	39754989	37217691	2537298	0.936177	32794313	30897120	0.942149	2075480	0.0671739	2500748	0.0809379	30.5707	24_ET59	matched	exact	24_ET59	42251958	39793918	2458040	0.941824	34795708	32976420	0.947715	2061949	0.062528	2481988	0.0752655	30.726	matched	exact	24_ET59	ET59	Coffea arabica	Wild	Bonga, Kefa Prov.	Ethiopia	7.28443	36.2563	1750	4	1.3	CaEa	EMBRAPA	Cerrado Center,DF, Brazil	Ethiopian accession related to Ar59			arabica_wild	TRUE
7	39754989	36876233	2878756	0.927588	32794313	30615490	0.933561	1706984	0.0557556	2054403	0.0671034	30.4663	7	matched	exact	7	42251958	39429463	2822495	0.933198	34795708	32678859	0.939164	1696814	0.0519239	2040538	0.0624421	30.6228	matched	exact	7	Ar59-05	Coffea arabica	Wild	Bonga, Kefa Prov.	Ethiopia	7.28443	36.2563	1700	4	1.3	CaEa	IRD	La Réunion, France	Ethiopian accession, IRD recollection mission 1966.	Guillaumet & Hallé 1978	Guillaumet, J.-L. & Hallé, F. (1978) Echantillonnage du matériel Coffea arabica récolté en Ethiopie. Bulletin IFCC, 13-18.	arabica_wild	TRUE
20_E261	39754989	36889178	2865811	0.927913	32794313	30637458	0.934231	1864691	0.0608631	2350688	0.0767259	28.3047	20_E261	matched	exact	20_E261	42251958	39459826	2792132	0.933917	34795708	32712232	0.940123	1853701	0.0566669	2334185	0.0713551	28.4387	matched	exact	20_E261	E261	Coffea arabica	Wild	Doyo, Kefa Prov.	Ethiopia	7.61667	36.7667	1770	4	1.3	CaEa	EMBRAPA	Cerrado Center,DF, Brazil	Ethiopian accession, Seeds from CATIE, FAO collection 1964	Meyer et al. 1968	Meyer, A.J.T., Fernie, L.M., Narasimhaswami, R.L., Monaco, L.C. & Greathead, D.J. (1968) FAO Coffee Mission to Ethiopia 1964-65. FAO, Rome	arabica_wild	TRUE
3	39754989	36735749	3019240	0.924054	32794313	30504379	0.930173	1902543	0.0623695	2394425	0.0784945	33.4955	3	matched	exact	3	42251958	39330080	2921878	0.930846	34795708	32601962	0.936954	1890610	0.0579907	2376853	0.0729052	33.6835	matched	exact	3	Ar36B	Coffea arabica	Wild	Kollo, Kefa Prov.	Ethiopia	6.14325	35.5868	1460	4	1.3	CaEa	R&D Nestlé	Nanegal, Ecuador	Ethiopian accession used as male Parent for genetic map, IRD recollection mission 1966.	Guillaumet & Hallé 1978	Guillaumet, J.-L. & Hallé, F. (1978) Echantillonnage du matériel Coffea arabica récolté en Ethiopie. Bulletin IFCC, 13-18.	arabica_wild	TRUE
17_BMJM	39754989	36819171	2935818	0.926152	32794313	30573653	0.932285	1931588	0.0631782	2374359	0.0776603	26.7004	17_BMJM	matched	exact	17_BMJM	42251958	39327870	2924088	0.930794	34795708	32600731	0.936918	1919841	0.0588895	2357018	0.0722995	26.9918	matched	exact	17_BMJM	BMJM	Coffea arabica	Cultivated	Planaltina DF	Brazil	-15.5956	-47.7311	1000	4	1.3	CaEa	EMBRAPA	Cerrado Center,DF, Brazil	C. arabica bourbon (Blue Mountain) from Jamaica can be considered as cultivated but with very few breeding cycles. British introduced coffee to Jamaica in 1730 using Typica obtained from French in Martinique.			arabica_cultivated	TRUE
8	39754989	37000378	2754611	0.93071	32794313	30713227	0.936541	2246830	0.0731551	2585713	0.0841889	33.4589	8	matched	exact	8	42251958	39565550	2686408	0.936419	34795708	32784118	0.942189	2228452	0.0679735	2564487	0.0782235	33.5368	matched	exact	8	E016/136	Coffea arabica	Wild	Shewa Prov.	Ethiopia	7.11667	38.6667	1800	4	1.3	CaEa	IAPAR	Londrina, PR, Brazil	Ethiopian accession, Seeds from CATIE, FAO collection 1964	Meyer et al. 1968	Meyer, A.J.T., Fernie, L.M., Narasimhaswami, R.L., Monaco, L.C. & Greathead, D.J. (1968) FAO Coffee Mission to Ethiopia 1964-65. FAO, Rome	arabica_wild	TRUE
21_E383	39754989	37295198	2459791	0.938126	32794313	30947932	0.943698	2007958	0.0648818	2489167	0.0804308	39.1573	21_E383	matched	exact	21_E383	42251958	39844427	2407531	0.94302	34795708	33009485	0.948665	1995921	0.0604651	2471505	0.0748726	39.2928	matched	exact	21_E383	E383	Coffea arabica	Wild	Kefa Prov.	Ethiopia	7.71667	36.3	1900	4	1.3	CaEa	EMBRAPA	Cerrado Center,DF, Brazil	Ethiopian accession, Seeds from CATIE, FAO collection 1964	Meyer et al. 1968	Meyer, A.J.T., Fernie, L.M., Narasimhaswami, R.L., Monaco, L.C. & Greathead, D.J. (1968) FAO Coffee Mission to Ethiopia 1964-65. FAO, Rome	arabica_wild	TRUE
2	39754989	36711961	3043028	0.923455	32794313	30482404	0.929503	1893621	0.0621218	2372003	0.0778155	32.7197	2	matched	exact	2	42251958	39249128	3002830	0.92893	34795708	32535039	0.93503	1881078	0.057817	2353254	0.0723298	32.8941	matched	exact	2	Ar17-05	Coffea arabica	Wild	Gimma-Gore Prov.	Ethiopia	8.14583	35.5294	1350	4	1.3	CaEa	R&D Nestlé	Nanegal, Ecuador	Ethiopian accession, IRD recollection mission 1966.	Guillaumet & Hallé 1978	Guillaumet, J.-L. & Hallé, F. (1978) Echantillonnage du matériel Coffea arabica récolté en Ethiopie. Bulletin IFCC, 13-18.	arabica_wild	TRUE
38_Et38C3	39754989	37049074	2705915	0.931935	32794313	30763817	0.938084	1981337	0.0644048	2354590	0.0765376	29.1413	38_Et38C3	matched	exact	38_Et38C3	42251958	39648222	2603736	0.938376	34795708	32864246	0.944491	1969362	0.0599241	2338731	0.0711634	29.2138	matched	exact	38_Et38C3	Et38C3	Coffea arabica	Wild	Shasa, Kefa Prov.	Ethiopia	7.18407	38.7161		4	1.3	CaEa	EMBRAPA	Cerrado Center,DF, Brazil	Ethiopian accession			arabica_wild	TRUE
14	39754989	36628637	3126352	0.92136	32794313	30416743	0.927501	1954596	0.0642605	2417873	0.0794915	27.036	14	matched	exact	14	42251958	39164838	3087120	0.926935	34795708	32467115	0.933078	1941743	0.0598065	2398503	0.0738748	27.1534	matched	exact	14	Geisha	Coffea arabica	Cultivated	Gesha, Ethiopia	Ethiopia	6.7	35.4667	1600-1800	4	1.3	CaEa	IAPAR	Londrina, PR, Brazil	Independent of Yemen cultivars, Ethiopian wild accession found near the town of Gesha (1931) and directly put to field. No known relationship with Bourbon/Typica.			arabica_cultivated	TRUE
22_E516	39754989	37069374	2685615	0.932446	32794313	30770006	0.938273	1999023	0.0649666	2507770	0.0815005	37.2886	22_E516	matched	exact	22_E516	42251958	39588454	2663504	0.936961	34795708	32798874	0.942613	1987021	0.060582	2489616	0.0759055	37.4273	matched	exact	22_E516	E516	Coffea arabica	Wild	Tunteta, Kefa Prov.	Ethiopia	6.86667	35.45	1620	4	1.3	CaEa	EMBRAPA	Cerrado Center,DF, Brazil	Ethiopian accession, Seeds from CATIE, FAO collection 1964	Meyer et al. 1968	Meyer, A.J.T., Fernie, L.M., Narasimhaswami, R.L., Monaco, L.C. & Greathead, D.J. (1968) FAO Coffee Mission to Ethiopia 1964-65. FAO, Rome	arabica_wild	TRUE
23_Erecta	39754989	37136061	2618928	0.934123	32794313	30825464	0.939964	2039772	0.0661717	2570956	0.0834036	36.4229	23_Erecta	matched	exact	23_Erecta	42251958	39637641	2614317	0.938126	34795708	32844466	0.943923	2027514	0.0617308	2552196	0.0777055	36.6092	matched	exact	23_Erecta	Erecta	Coffea arabica	Cultivated	Planaltina DF	Brazil	-15.5956	-47.7311	1000	4	1.3	CaEa	EMBRAPA	Cerrado Center,DF, Brazil	C. arabica Typica mutant probably from Java - indonesia	Carvalho 2008	Carvalho, C.H.S. de. (Ed.). Cultivares de café: origem, características e recomendações. Brasília: Embrapa Café, 2008a. v.1, p.284-285	arabica_cultivated	TRUE
TIP1	39754989	37306938	2448051	0.938422	32794313	30985860	0.944855	2111983	0.0681596	2640935	0.0852303	32.7354	TIP1	matched	exact	TIP1	42251958	39808127	2443831	0.942161	34795708	33003303	0.948488	2099717	0.0636214	2622708	0.079468	32.9313	matched	exact	TIP1	TIP1	Coffea arabica	Cultivated	IAC - Campinas	Brazil				4	1.3	CaEa	IAC - Campinas	Ex-situ germoplasm Collection	C. arabica variety Typica reference	Antunes Filho et al. 1957	Antunes Filho, H.; Carvalho, A. Genética de Coffea XVI. The variety typica as a standard for genetical studies of Coffea arabica. Journal of Heredity, v.48, p.110-117, 1957.	arabica_cultivated	FALSE
Amsterdam	39754989	36396284	3358705	0.915515	32794313	30271475	0.923071	1625288	0.0536904	2097463	0.0692884	14.669	Amsterdam	matched	exact	Amsterdam	42251958	38895414	3356544	0.920559	34795708	32288625	0.927948	1616387	0.0500606	2082314	0.0644906	14.7621	matched	exact	Amsterdam	Amsterdam	Coffea arabica	Cultivated	Amsterdam Botanical Garden, Amsterdam	The Netherlands				4	1.3	CaEa	Amsterdam Botanical Garden	Amsterdam, Netherlands	Bourbon variant growing in Amsterdam Botanical Gardens			arabica_cultivated	FALSE
28_Topazio	39754989	36983890	2771099	0.930296	32794313	30708713	0.936404	1972483	0.064232	2498951	0.081376	32.102	28_Topazio	matched	exact	28_Topazio	42251958	39470888	2781070	0.934179	34795708	32715670	0.940221	1960820	0.0599352	2480470	0.075819	31.7455	matched	exact	28_Topazio	Topazio	Coffea arabica	Cultivated	Planaltina DF	Brazil	-15.5956	-47.7311	1000	4	1.3	CaEa	EMBRAPA	Cerrado Center,DF, Brazil	C. arabica cultivar issued from a cross between Catuaí Amarelo and Mundo Novo	Carvalho 2008	Carvalho, C.H.S. de. (Ed.). Cultivares de café: origem, características e recomendações. Brasília: Embrapa Café, 2008a. v.1, p.284-285	arabica_cultivated	TRUE
37_Catuai99	39754989	36850469	2904520	0.926939	32794313	30603380	0.933192	1915315	0.0625851	2425514	0.0792564	27.105	37_Catuai99	matched	exact	37_Catuai99	42251958	39357455	2894503	0.931494	34795708	32626972	0.937672	1904171	0.0583619	2407812	0.0737982	27.2158	matched	exact	37_Catuai99	Catuai99	Coffea arabica	Cultivated	Planaltina DF	Brazil	-15.5956	-47.7311	1000	4	1.3	CaEa	EMBRAPA	Cerrado Center,DF, Brazil	Issued from a cross between Mundo Novo and Caturra (Caturra is a mutated Bourbon)			arabica_cultivated	TRUE
BB1	39754989	37136244	2618745	0.934128	32794313	30840514	0.940423	2083605	0.0675606	2618041	0.0848897	37.5622	BB1	matched	exact	BB1	42251958	39654331	2597627	0.938521	34795708	32872534	0.94473	2071316	0.0630105	2599268	0.0790711	37.7518	matched	exact	BB1	BB1	Coffea arabica	Cultivated	IAC - Campinas	Brazil				4	1.3	CaEa	IAC - Campinas	Ex-situ germoplasm Collection	C. arabica variety Bourbon reference	Krug et al. 1951	Krug, C.A.; Carvalho, A. The genetics of Coffea. Advances in Genetics, v.4, p.127-158, 1951.	arabica_cultivated	FALSE
12	39754989	36323087	3431902	0.913674	32794313	30167798	0.919909	1825842	0.0605229	2314296	0.0767141	26.9791	12	matched	exact	12	42251958	38841540	3410418	0.919284	34795708	32200763	0.925423	1814122	0.0563379	2296057	0.0713044	27.0995	matched	exact	12	M.Novo	Coffea arabica	Cultivated	IAPAR, Londrina, PR	Brazil	-23.3518	-51.1516	580	4	1.3	CaEa	IAPAR	Londrina, PR, Brazil	Typica (from Sumatra) x Bourbon	Carvalho et al. 1952	Carvalho, A. et al . Melhoramento do cafeeiro: IV - Café Mundo Novo. Bragantia, Campinas , v. 12, n. 4-6, p. 97-130, June 1952 . https://doi.org/10.1590/S0006-87051952000200001.	arabica_cultivated	TRUE
25_JK1	39754989	36808521	2946468	0.925884	32794313	30570679	0.932195	1897931	0.0620834	2401993	0.0785718	27.6044	25_JK1	matched	exact	25_JK1	42251958	39330767	2921191	0.930863	34795708	32605299	0.937049	1886638	0.0578629	2384906	0.0731447	27.7845	matched	exact	25_JK1	JK1	Coffea arabica	Cultivated	Planaltina DF	Brazil	-15.5956	-47.7311	1000	4	1.3	CaEa	EMBRAPA	Cerrado Center,DF, Brazil	"Jackson 1" - Indian variety, originates from 7 seeds smuggled out from Yemen by Baba Buda. Belongs to "Typica" haplogroup			arabica_cultivated	TRUE
13	39754989	36768465	2986524	0.924877	32794313	30520106	0.930652	1935208	0.0634076	2441678	0.0800023	33.9626	13	matched	exact	13	42251958	39307997	2943961	0.930324	34795708	32570296	0.936043	1922772	0.0590345	2422876	0.0743891	34.076	matched	exact	13	Bourbon	Coffea arabica	Cultivated	IAPAR, Londrina, PR	Brazil	-15.5956	-47.7311	1000	4	1.3	CaEa	IAPAR	Londrina, PR, Brazil	A Typica mutant, Bourbon Variety after mass selection	Bourbon Tekisic El Salvador	González, J.A., TEKISIC: an improved Bourbon variety [Coffea arabica L. El Salvador. Agricultura en El Salvador (El Salvador). v. 15(3) p. 3-4. Jul 1976	arabica_cultivated	TRUE
27_Rubi	39754989	37154687	2600302	0.934592	32794313	30835080	0.940257	2042413	0.0662367	2584561	0.0838189	38.9635	27_Rubi	matched	exact	27_Rubi	42251958	39665851	2586107	0.938793	34795708	32861110	0.944401	2030317	0.0617848	2565673	0.0780763	39.1273	matched	exact	27_Rubi	Rubi	Coffea arabica	Cultivated	Planaltina DF	Brazil	-15.5956	-47.7311	1000	4	1.3	CaEa	EMBRAPA	Cerrado Center,DF, Brazil	C. arabica cultivar issued from a cross between Catuaí Vermelho and Mundo Novo	Carvalho 2008	Carvalho, C.H.S. de. (Ed.). Cultivares de café: origem, características e recomendações. Brasília: Embrapa Café, 2008a. v.1, p.284-285	arabica_cultivated	TRUE
39_Guatemalense	39754989	37024447	2730542	0.931316	32794313	30737646	0.937286	2011553	0.0654426	2517231	0.0818941	33.0499	39_Guatemalense	matched	exact	39_Guatemalense	42251958	39549280	2702678	0.936034	34795708	32775514	0.941941	2000208	0.0610275	2499917	0.0762739	33.2598	matched	exact	39_Guatemalense	Guatemalense	Coffea arabica	Cultivated	Planaltina DF	Brazil	-15.5956	-47.7311	1000	4	1.3	CaEa	EMBRAPA	Cerrado Center,DF, Brazil	Cross between C. arabica dwarf Typica mutant "Pache colis" found in Mataquescuintla (Guatemala) and Caturra			arabica_cultivated	TRUE
LINN32	39754989	23202532	16552457	0.583638	32794313	19753620	0.602349	224602	0.0113702	380511	0.0192628	3.22717	LINN32	matched	exact	LINN32	42251958	24956238	17295720	0.590653	34795708	21204138	0.609389	224263	0.0105764	378414	0.0178462	3.22329	matched	exact	LINN32	LINN_232	Coffea arabica	Wild	Linnean society, London	Great-Britain	13.3023	43.2361		4	1.3	CaEa	NHM, London		Herbarium sample from the Linnean society in London, lectotype for C. arabica, probably collected in Yemen			arabica_wild	TRUE
32_Bourbonpointu	39754989	36793296	2961693	0.925501	32794313	30563831	0.931986	1850091	0.060532	2349133	0.0768599	23.4867	32_Bourbonpointu	matched	exact	32_Bourbonpointu	42251958	39299671	2952287	0.930127	34795708	32586580	0.936511	1839613	0.0564531	2332286	0.071572	23.6515	matched	exact	32_Bourbonpointu	Bourbon pointu	Coffea arabica	Cultivated	La Réunion Island	France (La Réunion)	-21.313	55.5114		4	1.3	CaEa	IRD	La Réunion, France	Bourbon mutant "Laurina" originating from island of Bourbon (Reunion). Many phenotypic differences to Bourbon, genetics behaves as a single locus mutant.	Lécolier (2006)	Lécolier A. (2006) Caractérisation de certains impacts de la mutation Laurina chez Coffea arabica L. aux niveaux histo-morphologique et moléculaire. Thèse de doctorat Univ. de la Réunion	arabica_cultivated	TRUE
26_Moka	39754989	36653896	3101093	0.921995	32794313	30451096	0.928548	1827921	0.0600281	2317379	0.0761017	24.0707	26_Moka	matched	exact	26_Moka	42251958	39177536	3074422	0.927236	34795708	32488465	0.933692	1816794	0.0559212	2300051	0.0707959	24.1917	matched	exact	26_Moka	Moka	Coffea arabica	Cultivated	Planaltina DF	Brazil	-15.5956	-47.7311	1000	4	1.3	CaEa	EMBRAPA	Cerrado Center,DF, Brazil	Bourbon mutant			arabica_cultivated	TRUE
BP409_sgC	39754989	29093948	10661041	0.731831	32794313	23976074	0.731105	4269847	0.178088	6931306	0.289093	32.5235	BP409	rescued	normalized:BP409	BP409_sgE	42251958	27823007	14428951	0.658502	34795708	22850745	0.656712	4957521	0.216952	10721943	0.469216	31.2841	rescued	normalized:BP409	BP409	BP409	Coffea canephora	Cultivated	ICCRI, Jember	Indonesia	-8.2574	113.616		2	0.71	C	ICCRI	Jember, Indonesia	Parent of the F1 segregating Robusta genetic map from ICCRI (Indonesia)			canephora	TRUE
Q121_sgC	39754989	28448795	11306194	0.715603	32794313	23467135	0.715586	4400207	0.187505	8322312	0.354637	29.9568	Q121	rescued	normalized:Q121	Q121_sgE	42251958	27550189	14701769	0.652045	34795708	22648343	0.650895	4855904	0.214404	10962653	0.484038	29.0609	rescued	normalized:Q121	Q121	Q121	Coffea canephora	Cultivated	ICCRI, Jember	Indonesia	-8.2574	113.616		2	0.71	C	ICCRI	Jember, Indonesia	Parent of the F1 segregating Robusta genetic map from ICCRI (Indonesia)			canephora	TRUE
BUD15_sgC	39754989	29133739	10621250	0.732832	32794313	23982724	0.731307	3434038	0.143188	5630830	0.234787	45.2458	BUD15	rescued	normalized:BUD15	BUD15_sgE	42251958	27616969	14634989	0.653626	34795708	22669521	0.651503	4388320	0.193578	9973515	0.439953	44.6491	rescued	normalized:BUD15	BUD15	BUD15	Coffea canephora	Wild	Budongo	Uganda	1.78727	31.5074		2	0.71	C	NARO/IRD	Budango forest, Uganda	Collected in Uganda, Budango forest 2012 (IRD/NARO)			canephora	TRUE
40_BU-A_Eugenioides	39754989	24906718	14848271	0.626505	32794313	20398590	0.622016	4661235	0.228508	9994710	0.489971	31.1415	40_BU-A	rescued	normalized:40_BU-A	40_BU-A_Eugenioides	42251958	27887922	14364036	0.660039	34795708	22850602	0.656707	3852338	0.168588	6402088	0.280172	30.2199	rescued	normalized:40_BU-A	40_BU-A	BU-A	Coffea eugenioides	Wild	Budongo	Uganda	1.78727	31.5074		2	0.67	E	NARO	Budango forest, Uganda	Female parental species of C. arabica. Collected in Uganda, Budango forest in 2012 (IRD/NARO)			eugenioides	TRUE
DA56_sgC	39754989	22250558	17504431	0.559692	32794313	18383470	0.560569	2231143	0.121367	6835351	0.37182	16.9943	DA56	rescued	normalized:DA56	DA56_sgE	42251958	26799303	15452655	0.634274	34795708	22021266	0.632873	2252815	0.102302	4900734	0.222546	19.737	rescued	normalized:DA56	DA56	DA56	Coffea eugenioides	Wild	Kambiri, kakamega	Kenya	0.342977	34.8724	1660-2200	2	0.67	E	IRD	La Réunion, France	IRD collecting mission Kenya 1977	Berthaud et al. 1980	Berthaud, J., Guillaumet, J.-L., Le Pierres, D. & Lourd, M. (1980) Rapport de prospection des caféiers du Kenya. Café, Cacao, Thé, XXIV, 101-112.	eugenioides	TRUE
[truncated: 48 more columns]

## Sheet: Group_relationships
pair_group_1	pair_group_2	n_pairs_sgC	mean_ibs_sgC	median_ibs_sgC	min_ibs_sgC	max_ibs_sgC	mean_distance_1_minus_ibs_sgC	n_pairs_sgE	mean_ibs_sgE	median_ibs_sgE	min_ibs_sgE	max_ibs_sgE	mean_distance_1_minus_ibs_sgE	delta_mean_ibs_sgC_minus_sgE	sgC_centroid_distance_pc1_to_pc5	sgE_centroid_distance_pc1_to_pc5	delta_centroid_distance_pc1_to_pc5_sgC_minus_sgE	subgenome_with_higher_similarity_by_mean_ibs	subgenome_with_greater_centroid_separation	absolute_delta_mean_ibs	absolute_delta_centroid_distance
arabica_wild	eugenioides	36	0.464902	0.459407	0.425655	0.47968	0.535098	36	0.719622	0.717543	0.710913	0.763799	0.280378	-0.25472	198.896	147.318	51.5773	sgE	sgC	0.25472	51.5773
arabica_cultivated	eugenioides	30	0.462848	0.463187	0.449487	0.476634	0.537152	30	0.713244	0.712347	0.709168	0.722369	0.286756	-0.250397	200.447	150.645	49.8017	sgE	sgC	0.250397	49.8017
arabica_introgressed	eugenioides	12	0.456544	0.450168	0.436346	0.506461	0.543456	12	0.699883	0.699818	0.693053	0.708076	0.300117	-0.243339	204.445	164.859	39.5861	sgE	sgC	0.243339	39.5861
arabica_introgressed	canephora	18	0.55979	0.571944	0.468581	0.668562	0.44021	18	0.319211	0.31237	0.288829	0.377806	0.680789	0.240579	174.993	267.696	-92.7025	sgC	sgE	0.240579	92.7025
arabica_wild	canephora	54	0.525863	0.501063	0.455343	0.611734	0.474137	54	0.29674	0.297086	0.241193	0.322327	0.70326	0.229123	189.179	268.786	-79.6064	sgC	sgE	0.229123	79.6064
arabica_cultivated	canephora	45	0.52265	0.496368	0.467247	0.603257	0.47735	45	0.295466	0.294482	0.274694	0.318159	0.704534	0.227184	190.826	269.98	-79.1536	sgC	sgE	0.227184	79.1536
canephora	eugenioides	6	0.575868	0.536955	0.52286	0.66916	0.424132	6	0.396662	0.392722	0.381533	0.415143	0.603338	0.179206	191.617	253.778	-62.1602	sgC	sgE	0.179206	62.1602
canephora	canephora	3	0.71169	0.727528	0.674054	0.733488	0.28831	3	0.869549	0.872548	0.859183	0.876917	0.130451	-0.157859	0	0	0	sgE	tie	0.157859	0
eugenioides	eugenioides	1	0.903562	0.903562	0.903562	0.903562	0.0964377	1	0.863167	0.863167	0.863167	0.863167	0.136833	0.040395	0	0	0	sgC	tie	0.040395	0
arabica_introgressed	arabica_wild	108	0.799595	0.799301	0.733474	0.853176	0.200405	108	0.839156	0.833577	0.813809	0.877604	0.160844	-0.0395607	107.268	101.654	5.61389	sgE	sgC	0.0395607	5.61389
arabica_introgressed	arabica_introgressed	15	0.840567	0.858942	0.774803	0.895928	0.159433	15	0.875426	0.884586	0.829607	0.913681	0.124574	-0.0348584	0	0	0	sgE	tie	0.0348584	0
arabica_cultivated	arabica_introgressed	90	0.827096	0.830259	0.770132	0.879373	0.172904	90	0.861331	0.856983	0.830284	0.901486	0.138669	-0.0342345	100.386	95.8121	4.57366	sgE	sgC	0.0342345	4.57366
arabica_wild	arabica_wild	153	0.901811	0.9034	0.864165	0.925635	0.0981892	153	0.92248	0.923054	0.899212	0.939316	0.0775198	-0.0206693	0	0	0	sgE	tie	0.0206693	0
arabica_cultivated	arabica_wild	270	0.897866	0.897473	0.881028	0.915052	0.102134	270	0.918489	0.918133	0.908826	0.934762	0.0815111	-0.0206231	45.4213	40.167	5.25427	sgE	sgC	0.0206231	5.25427
arabica_cultivated	arabica_cultivated	105	0.929544	0.933314	0.905798	0.943707	0.0704558	105	0.943505	0.945497	0.926612	0.953341	0.0564948	-0.013961	0	0	0	sgE	tie	0.013961	0

## Sheet: Group_parental_summary
analysis_group	n_accessions	mean_sgC_parental_advantage	mean_sgE_parental_advantage	mean_parental_consistency_score	mean_parental_distortion_score	mean_introgression_shift	mean_canephora_affinity	mean_eugenioides_affinity	mean_abs_delta_introgressed_shift
eugenioides	2	-0.327695	0.466505	0.0694053	0.7942	-0.00983244	0.486265	0.883365	0.00705755
canephora	3	0.135822	-0.472887	-0.168532	0.608709	0.0304422	0.790619	0.486265	0.019312
arabica_wild	18	0.0609609	0.422882	0.241922	0.361922	-0.0888017	0.411301	0.592262	0.0189377
arabica_cultivated	15	0.0598028	0.417778	0.23879	0.357975	-0.0923114	0.409058	0.588046	0.0202735
arabica_introgressed	6	0.103246	0.380672	0.241959	0.277426	0.0137833	0.439501	0.578214	0.00468602

## Sheet: Cultivated_candidates
sgC_sample_id	sgC_total_sites	sgC_called_sites	sgC_missing_sites	sgC_call_rate_all_sites	sgC_biallelic_snp_sites	sgC_called_biallelic_snp_sites	sgC_call_rate_biallelic_snps	sgC_het_biallelic_snp_sites	sgC_heterozygosity_rate_biallelic_snps	sgC_nonref_biallelic_snp_sites	sgC_non_reference_rate_biallelic_snps	sgC_mean_depth	canonical_seq_id	sgC_rescue_status	sgC_rescue_method	sgE_sample_id	sgE_total_sites	sgE_called_sites	sgE_missing_sites	sgE_call_rate_all_sites	sgE_biallelic_snp_sites	sgE_called_biallelic_snp_sites	sgE_call_rate_biallelic_snps	sgE_het_biallelic_snp_sites	sgE_heterozygosity_rate_biallelic_snps	sgE_nonref_biallelic_snp_sites	sgE_non_reference_rate_biallelic_snps	sgE_mean_depth	sgE_rescue_status	sgE_rescue_method	seq_id	accession_name	species_name	variety	location_code	country_of_origin	Latitude	Longitude	altitude	ploidy_level	genome_size_gb	genome_structure	donor_institute	collection_location	notes	ref	full_reference	analysis_group	has_latitude
17_BMJM	39754989	36819171	2935818	0.926152	32794313	30573653	0.932285	1931588	0.0631782	2374359	0.0776603	26.7004	17_BMJM	matched	exact	17_BMJM	42251958	39327870	2924088	0.930794	34795708	32600731	0.936918	1919841	0.0588895	2357018	0.0722995	26.9918	matched	exact	17_BMJM	BMJM	Coffea arabica	Cultivated	Planaltina DF	Brazil	-15.5956	-47.7311	1000	4	1.3	CaEa	EMBRAPA	Cerrado Center,DF, Brazil	C. arabica bourbon (Blue Mountain) from Jamaica can be considered as cultivated but with very few breeding cycles. British introduced coffee to Jamaica in 1730 using Typica obtained from French in Martinique.			arabica_cultivated	TRUE
14	39754989	36628637	3126352	0.92136	32794313	30416743	0.927501	1954596	0.0642605	2417873	0.0794915	27.036	14	matched	exact	14	42251958	39164838	3087120	0.926935	34795708	32467115	0.933078	1941743	0.0598065	2398503	0.0738748	27.1534	matched	exact	14	Geisha	Coffea arabica	Cultivated	Gesha, Ethiopia	Ethiopia	6.7	35.4667	1600-1800	4	1.3	CaEa	IAPAR	Londrina, PR, Brazil	Independent of Yemen cultivars, Ethiopian wild accession found near the town of Gesha (1931) and directly put to field. No known relationship with Bourbon/Typica.			arabica_cultivated	TRUE
23_Erecta	39754989	37136061	2618928	0.934123	32794313	30825464	0.939964	2039772	0.0661717	2570956	0.0834036	36.4229	23_Erecta	matched	exact	23_Erecta	42251958	39637641	2614317	0.938126	34795708	32844466	0.943923	2027514	0.0617308	2552196	0.0777055	36.6092	matched	exact	23_Erecta	Erecta	Coffea arabica	Cultivated	Planaltina DF	Brazil	-15.5956	-47.7311	1000	4	1.3	CaEa	EMBRAPA	Cerrado Center,DF, Brazil	C. arabica Typica mutant probably from Java - indonesia	Carvalho 2008	Carvalho, C.H.S. de. (Ed.). Cultivares de café: origem, características e recomendações. Brasília: Embrapa Café, 2008a. v.1, p.284-285	arabica_cultivated	TRUE
TIP1	39754989	37306938	2448051	0.938422	32794313	30985860	0.944855	2111983	0.0681596	2640935	0.0852303	32.7354	TIP1	matched	exact	TIP1	42251958	39808127	2443831	0.942161	34795708	33003303	0.948488	2099717	0.0636214	2622708	0.079468	32.9313	matched	exact	TIP1	TIP1	Coffea arabica	Cultivated	IAC - Campinas	Brazil				4	1.3	CaEa	IAC - Campinas	Ex-situ germoplasm Collection	C. arabica variety Typica reference	Antunes Filho et al. 1957	Antunes Filho, H.; Carvalho, A. Genética de Coffea XVI. The variety typica as a standard for genetical studies of Coffea arabica. Journal of Heredity, v.48, p.110-117, 1957.	arabica_cultivated	FALSE
Amsterdam	39754989	36396284	3358705	0.915515	32794313	30271475	0.923071	1625288	0.0536904	2097463	0.0692884	14.669	Amsterdam	matched	exact	Amsterdam	42251958	38895414	3356544	0.920559	34795708	32288625	0.927948	1616387	0.0500606	2082314	0.0644906	14.7621	matched	exact	Amsterdam	Amsterdam	Coffea arabica	Cultivated	Amsterdam Botanical Garden, Amsterdam	The Netherlands				4	1.3	CaEa	Amsterdam Botanical Garden	Amsterdam, Netherlands	Bourbon variant growing in Amsterdam Botanical Gardens			arabica_cultivated	FALSE
28_Topazio	39754989	36983890	2771099	0.930296	32794313	30708713	0.936404	1972483	0.064232	2498951	0.081376	32.102	28_Topazio	matched	exact	28_Topazio	42251958	39470888	2781070	0.934179	34795708	32715670	0.940221	1960820	0.0599352	2480470	0.075819	31.7455	matched	exact	28_Topazio	Topazio	Coffea arabica	Cultivated	Planaltina DF	Brazil	-15.5956	-47.7311	1000	4	1.3	CaEa	EMBRAPA	Cerrado Center,DF, Brazil	C. arabica cultivar issued from a cross between Catuaí Amarelo and Mundo Novo	Carvalho 2008	Carvalho, C.H.S. de. (Ed.). Cultivares de café: origem, características e recomendações. Brasília: Embrapa Café, 2008a. v.1, p.284-285	arabica_cultivated	TRUE
37_Catuai99	39754989	36850469	2904520	0.926939	32794313	30603380	0.933192	1915315	0.0625851	2425514	0.0792564	27.105	37_Catuai99	matched	exact	37_Catuai99	42251958	39357455	2894503	0.931494	34795708	32626972	0.937672	1904171	0.0583619	2407812	0.0737982	27.2158	matched	exact	37_Catuai99	Catuai99	Coffea arabica	Cultivated	Planaltina DF	Brazil	-15.5956	-47.7311	1000	4	1.3	CaEa	EMBRAPA	Cerrado Center,DF, Brazil	Issued from a cross between Mundo Novo and Caturra (Caturra is a mutated Bourbon)			arabica_cultivated	TRUE
BB1	39754989	37136244	2618745	0.934128	32794313	30840514	0.940423	2083605	0.0675606	2618041	0.0848897	37.5622	BB1	matched	exact	BB1	42251958	39654331	2597627	0.938521	34795708	32872534	0.94473	2071316	0.0630105	2599268	0.0790711	37.7518	matched	exact	BB1	BB1	Coffea arabica	Cultivated	IAC - Campinas	Brazil				4	1.3	CaEa	IAC - Campinas	Ex-situ germoplasm Collection	C. arabica variety Bourbon reference	Krug et al. 1951	Krug, C.A.; Carvalho, A. The genetics of Coffea. Advances in Genetics, v.4, p.127-158, 1951.	arabica_cultivated	FALSE
12	39754989	36323087	3431902	0.913674	32794313	30167798	0.919909	1825842	0.0605229	2314296	0.0767141	26.9791	12	matched	exact	12	42251958	38841540	3410418	0.919284	34795708	32200763	0.925423	1814122	0.0563379	2296057	0.0713044	27.0995	matched	exact	12	M.Novo	Coffea arabica	Cultivated	IAPAR, Londrina, PR	Brazil	-23.3518	-51.1516	580	4	1.3	CaEa	IAPAR	Londrina, PR, Brazil	Typica (from Sumatra) x Bourbon	Carvalho et al. 1952	Carvalho, A. et al . Melhoramento do cafeeiro: IV - Café Mundo Novo. Bragantia, Campinas , v. 12, n. 4-6, p. 97-130, June 1952 . https://doi.org/10.1590/S0006-87051952000200001.	arabica_cultivated	TRUE
25_JK1	39754989	36808521	2946468	0.925884	32794313	30570679	0.932195	1897931	0.0620834	2401993	0.0785718	27.6044	25_JK1	matched	exact	25_JK1	42251958	39330767	2921191	0.930863	34795708	32605299	0.937049	1886638	0.0578629	2384906	0.0731447	27.7845	matched	exact	25_JK1	JK1	Coffea arabica	Cultivated	Planaltina DF	Brazil	-15.5956	-47.7311	1000	4	1.3	CaEa	EMBRAPA	Cerrado Center,DF, Brazil	"Jackson 1" - Indian variety, originates from 7 seeds smuggled out from Yemen by Baba Buda. Belongs to "Typica" haplogroup			arabica_cultivated	TRUE
13	39754989	36768465	2986524	0.924877	32794313	30520106	0.930652	1935208	0.0634076	2441678	0.0800023	33.9626	13	matched	exact	13	42251958	39307997	2943961	0.930324	34795708	32570296	0.936043	1922772	0.0590345	2422876	0.0743891	34.076	matched	exact	13	Bourbon	Coffea arabica	Cultivated	IAPAR, Londrina, PR	Brazil	-15.5956	-47.7311	1000	4	1.3	CaEa	IAPAR	Londrina, PR, Brazil	A Typica mutant, Bourbon Variety after mass selection	Bourbon Tekisic El Salvador	González, J.A., TEKISIC: an improved Bourbon variety [Coffea arabica L. El Salvador. Agricultura en El Salvador (El Salvador). v. 15(3) p. 3-4. Jul 1976	arabica_cultivated	TRUE
27_Rubi	39754989	37154687	2600302	0.934592	32794313	30835080	0.940257	2042413	0.0662367	2584561	0.0838189	38.9635	27_Rubi	matched	exact	27_Rubi	42251958	39665851	2586107	0.938793	34795708	32861110	0.944401	2030317	0.0617848	2565673	0.0780763	39.1273	matched	exact	27_Rubi	Rubi	Coffea arabica	Cultivated	Planaltina DF	Brazil	-15.5956	-47.7311	1000	4	1.3	CaEa	EMBRAPA	Cerrado Center,DF, Brazil	C. arabica cultivar issued from a cross between Catuaí Vermelho and Mundo Novo	Carvalho 2008	Carvalho, C.H.S. de. (Ed.). Cultivares de café: origem, características e recomendações. Brasília: Embrapa Café, 2008a. v.1, p.284-285	arabica_cultivated	TRUE
39_Guatemalense	39754989	37024447	2730542	0.931316	32794313	30737646	0.937286	2011553	0.0654426	2517231	0.0818941	33.0499	39_Guatemalense	matched	exact	39_Guatemalense	42251958	39549280	2702678	0.936034	34795708	32775514	0.941941	2000208	0.0610275	2499917	0.0762739	33.2598	matched	exact	39_Guatemalense	Guatemalense	Coffea arabica	Cultivated	Planaltina DF	Brazil	-15.5956	-47.7311	1000	4	1.3	CaEa	EMBRAPA	Cerrado Center,DF, Brazil	Cross between C. arabica dwarf Typica mutant "Pache colis" found in Mataquescuintla (Guatemala) and Caturra			arabica_cultivated	TRUE
32_Bourbonpointu	39754989	36793296	2961693	0.925501	32794313	30563831	0.931986	1850091	0.060532	2349133	0.0768599	23.4867	32_Bourbonpointu	matched	exact	32_Bourbonpointu	42251958	39299671	2952287	0.930127	34795708	32586580	0.936511	1839613	0.0564531	2332286	0.071572	23.6515	matched	exact	32_Bourbonpointu	Bourbon pointu	Coffea arabica	Cultivated	La Réunion Island	France (La Réunion)	-21.313	55.5114		4	1.3	CaEa	IRD	La Réunion, France	Bourbon mutant "Laurina" originating from island of Bourbon (Reunion). Many phenotypic differences to Bourbon, genetics behaves as a single locus mutant.	Lécolier (2006)	Lécolier A. (2006) Caractérisation de certains impacts de la mutation Laurina chez Coffea arabica L. aux niveaux histo-morphologique et moléculaire. Thèse de doctorat Univ. de la Réunion	arabica_cultivated	TRUE
26_Moka	39754989	36653896	3101093	0.921995	32794313	30451096	0.928548	1827921	0.0600281	2317379	0.0761017	24.0707	26_Moka	matched	exact	26_Moka	42251958	39177536	3074422	0.927236	34795708	32488465	0.933692	1816794	0.0559212	2300051	0.0707959	24.1917	matched	exact	26_Moka	Moka	Coffea arabica	Cultivated	Planaltina DF	Brazil	-15.5956	-47.7311	1000	4	1.3	CaEa	EMBRAPA	Cerrado Center,DF, Brazil	Bourbon mutant			arabica_cultivated	TRUE
[truncated: 48 more columns]

[truncated: 32 more sheets: Introgressed_references, Wild_candidates, Asymmetry_candidates, Shared_hotspots_all, Same_contig_nonoverlap, Subgenome_specific_hotspots, Contrast_consensus, sgC_top_markers, sgE_top_markers, PCA_scores_sgC, PCA_scores_sgE, Final_accession_shortlist, Primary_accession_shortlist, Accession_role_matrix, Final_hotspot_shortlist, Final_shared_hotspots, Primary_shared_hotspots, Final_subgenome_specific, Primary_subgenome_specific, Marker_support_shared …]
